# Supplementary material for: Fibrillar Aβ triggers microglial proteome alterations and dysfunction in Alzheimer mouse models
Source: eLife journal article supplement (doi:10.7554/elife.54083), 2020-06-08
Supplement: fig9-data1 [file elife-54083-fig9-data1-v1.pdf]

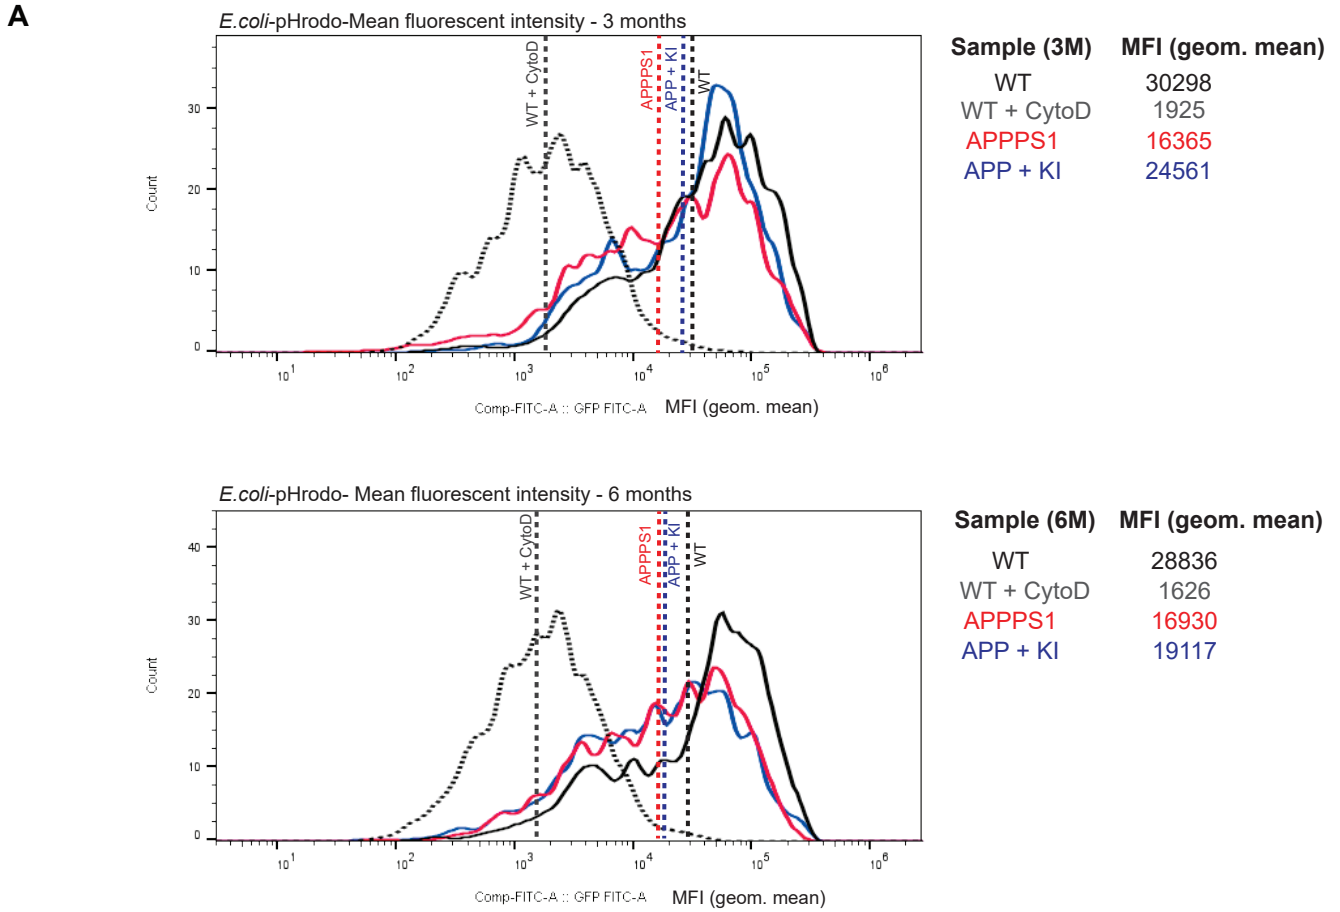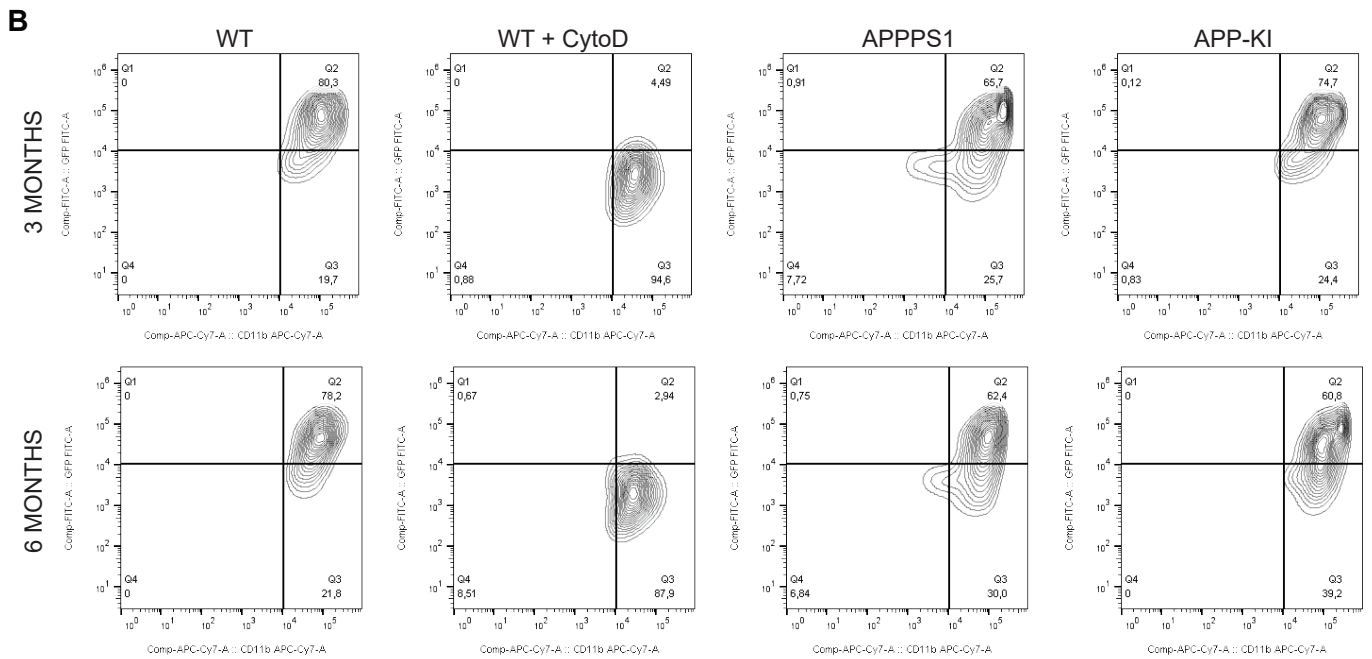

Figure 9-source data 1
