# Supplementary material for: Fibrillar Aβ triggers microglial proteome alterations and dysfunction in Alzheimer mouse models
Source: eLife. 2020 Jun 8;9:e54083. doi: 10.7554/eLife.54083 (PMC7279888; doi:10.7554/eLife.54083)
Supplement: Figure 2—source data 1. — Protein groups are represented by the UniProt accession number. [file elife-54083-fig2-data1.xlsx]

## Sheet: APPPS1
				MARPs (upregulated: +1; downregulated: -1)			Protein LFQ ratios of APPPS1 vs WT microglia				log2 transformed protein LFQ ratios of APPPS1 vs WT microglia				Student's Ttest p-values of protein changes APPPS1 vs WT microglia (p < 0.05: red)				Number of quantifications in different experimental groups								log2 transformed LFQ intensities WT 1 month			log2 transformed LFQ intensities APPPS1 1 month			log2 transformed LFQ intensities WT 3 months			log2 transformed LFQ intensities APPPS1 3 months			log2 transformed LFQ intensities WT 6 months			log2 transformed LFQ intensities APPPS1 6 months			log2 transformed LFQ intensities WT 12 months			log2 transformed LFQ intensities APPPS1 12 months
Gene Names	UniProt Accession	Accession 1	Protein Names	Early MARP	Middle MARP	Advanced MARP	ratio (APPPS1/WT) 01M	ratio (APPPS1/WT) 03M	ratio (APPPS1/WT) 06M	ratio (APPPS1/WT) 12M	log2 (APPPS1/WT) 01M	log2 (APPPS1/WT) 03M	log2 (APPPS1/WT) 06M	log2 (APPPS1/WT) 12M	p (APPPS1/WT) 01M	p (APPPS1/WT) 03M	p (APPPS1/WT) 06M	p (APPPS1/WT) 12M	Quants WT_01M	Quants APPPS1_01M	Quants WT_03M	Quants APPPS1_03M	Quants WT_06M	Quants APPPS1_06M	Quants WT_12M	Quants APPPS1_12M	log2 LFQ WT_01M_1	log2 LFQ WT_01M_2	log2 LFQ WT_01M_3	log2 LFQ APPPS1_01M_1	log2 LFQ APPPS1_01M_2	log2 LFQ APPPS1_01M_3	log2 LFQ WT_03M_1	log2 LFQ WT_03M_2	log2 LFQ WT_03M_3	log2 LFQ APPPS1_03M_1	log2 LFQ APPPS1_03M_2	log2 LFQ APPPS1_03M_3	log2 LFQ WT_06M_1	log2 LFQ WT_06M_2	log2 LFQ WT_06M_3	log2 LFQ APPPS1_06M_1	log2 LFQ APPPS1_06M_2	log2 LFQ APPPS1_06M_3	log2 LFQ WT_12M_1	log2 LFQ WT_12M_2	log2 LFQ WT_12M_3	log2 LFQ APPPS1_12M_1	log2 LFQ APPPS1_12M_2
Aaas	P58742	P58742	Aladin	0	0	0	1.05912	1.08297	1.16527	1.38633	0.08286	0.114987	0.220663	0.47127	0.549617	0.0609827	0.151598	0.0137576	3	3	3	3	3	3	3	3	15.1667	15.3234	14.9391	15.1242	15.2196	15.3339	16.1488	16.1146	16.1861	16.2384	16.3423	16.2138	16.1702	15.8779	16.201	16.3646	16.3832	16.1633	15.9727	15.7706	15.974	16.2737	16.5558
Aacs	Q9D2R0	Q9D2R0	Acetoacetyl-CoA synthetase	0	1	0	0.894574	1.06241	1.68764	2.30599	-0.160727	0.08734	0.755007	1.20538	0.382243	0.415073	0.00824978	0.0018578	3	3	3	3	3	3	3	3	16.1117	15.6065	15.6738	15.5548	15.6948	15.6602	17.4537	17.2125	17.4494	17.4119	17.3991	17.5666	17.2418	17.2029	17.3355	18.2718	18.0215	17.7519	16.3361	16.6563	16.7488	17.7236	17.9948
Aagab	Q8R2R3	Q8R2R3	Alpha- and gamma-adaptin-binding protein p34	0	0	-1	0.863072	0.987081	0.811742	0.555018	-0.212447	-0.01876	-0.300907	-0.849393	0.338194	0.849814	0.00129697	0.0065725	3	3	3	3	3	3	3	3	16.7187	17.3388	17.1571	16.8799	16.9613	16.7361	17.9831	18.0908	17.9266	17.8923	18.1399	17.912	18.2047	18.2437	18.1888	17.8477	17.9247	17.9621	17.7053	17.6059	17.5391	17.0644	16.5336
Aak1	Q3UHJ0	Q3UHJ0	AP2-associated protein kinase 1	0	0	1	1.16839	0.845871	0.92785	1.45168	0.22452	-0.24149	-0.108037	0.537727	0.130824	0.26724	0.603296	0.012212	3	3	3	3	3	3	3	3	16.614	16.6963	16.9107	17.1196	16.8625	16.9123	18.9904	18.6961	19.2669	18.8542	18.8086	18.5661	18.446	18.3847	18.9379	18.6236	18.4675	18.3534	17.2853	17.2842	17.5013	17.6949	17.9749
Aamdc	Q8R0P4	Q8R0P4	Mth938 domain-containing protein	0	0	0	0.945256	0.584656	0.562476	1.0137	-0.0812233	-0.77434	-0.830137	0.0196267	0.525251	0.129875	0.0148018	0.893255	3	3	3	3	3	3	3	3	15.4167	15.2856	15.4011	15.4323	15.0726	15.3549	17.1062	16.5834	15.9676	16.1251	15.8907	15.3184	16.7422	16.5917	16.6579	15.7974	16.1927	15.5114	15.896	16.1559	15.8492	16.1761	15.9401
Aar2	Q9D2V5	Q9D2V5	Protein AAR2 homolog	0	0	0	1.06031	0.784329	1.07314	1.18811	0.0844833	-0.35047	0.101833	0.248663	0.762977	0.622161	0.531532	0.633582	3	3	3	3	3	3	3	3	13.3092	12.8105	13.1496	13.0697	13.5904	12.8627	12.2926	13.0664	14.4835	12.6623	13.1531	12.9756	13.5381	14.0177	13.8291	13.8243	13.8685	13.9976	13.7365	12.463	13.0797	13.0703	12.9896
Aars	Q8BGQ7	Q8BGQ7	Alanine--tRNA ligase, cytoplasmic	0	0	0	0.96093	1.02144	0.936402	0.727568	-0.0574967	0.03061	-0.0948	-0.458847	0.395974	0.653677	0.334084	0.00154471	3	3	3	3	3	3	3	3	19.7233	19.7976	19.6903	19.771	19.5926	19.6751	20.1066	20.1572	20.297	20.2507	20.1629	20.2391	20.4379	20.6165	20.3838	20.3029	20.4759	20.3749	20.2081	20.3073	20.1681	19.8451	19.6959
Aarsd1	Q3THG9	Q3THG9	Alanyl-tRNA editing protein Aarsd1	0	0	1	0.996503	1.05552	1.2003	1.57816	-0.00505333	0.07795	0.263393	0.658247	0.978998	0.322648	0.245856	0.00365245	3	3	3	3	3	3	3	3	15.3417	15.9014	15.6752	15.7894	15.5763	15.5374	16.6795	16.679	16.4944	16.6338	16.7361	16.7168	16.521	16.5365	16.6972	17.0619	17.0043	16.4788	16.3835	16.0152	16.1758	16.8788	16.8494
Aass	Q99K67	Q99K67	Alpha-aminoadipic semialdehyde synthase, mitochondrial	0	0	0	NaN	0.0527455	0.165894	1.15004	NaN	-4.24481	-2.59166	0.20168	NaN	NaN	0.0454937	NaN	0	0	3	2	3	3	2	1	NaN	NaN	NaN	NaN	NaN	NaN	15.1365	14.2103	15.4177	11.6083	NaN	9.74505	14.0331	13.4351	14.8948	10.3203	11.2325	13.0352	11.7724	NaN	11.5084	11.8421	NaN
Abat	P61922	P61922	4-aminobutyrate aminotransferase, mitochondrial	0	0	0	1.13352	0.177524	0.403093	0.851952	0.180807	-2.49392	-1.31082	-0.231157	0.300887	0.0017404	0.108644	0.434409	3	3	3	3	3	3	3	3	17.6657	18.1421	17.7222	17.9804	18.0255	18.0666	21.7873	21.4179	22.1389	19.647	18.7762	19.4391	21.1937	20.3824	22.3178	20.3452	20.2274	19.3888	19.7259	19.4459	20.0661	19.6651	19.1244
Abca1	P41233	P41233	ATP-binding cassette sub-family A member 1	0	0	0	0.873204	0.966276	0.846356	0.8429	-0.19561	-0.0494933	-0.240663	-0.246567	0.0818026	0.586255	0.0660559	0.0296567	3	3	3	3	3	3	3	3	16.3158	16.337	16.124	16.1012	16.1257	15.963	16.8705	17.1038	17.1141	16.9575	17.0322	16.9502	17.2497	17.4746	17.2572	16.9715	17.1072	17.1807	16.9299	16.9349	16.9412	16.7155	16.5486
Abca2	P41234	P41234	ATP-binding cassette sub-family A member 2	0	0	0	0.903742	0.998003	0.945212	2.42191	-0.146017	-0.00288333	-0.08129	1.27614	0.516071	0.990398	0.765461	0.534402	3	3	3	3	3	3	3	3	15.2974	15.3701	15.7932	15.5269	15.0784	15.4175	15.9788	15.8946	16.3827	15.7528	16.2982	16.1965	14.8124	15.0632	14.4057	14.358	14.7564	14.923	13.1703	13.5726	13.4538	13.2203	18.397
Abca3	Q8R420	Q8R420	ATP-binding cassette sub-family A member 3	0	0	0	0.716089	2.95528	6.58664	3.76035	-0.48179	1.5633	2.71954	1.91087	NaN	1.06431e-05	0.0260288	0.0559177	3	2	3	3	3	3	3	3	13.0085	13.092	13.1191	NaN	12.4355	12.7474	14.3409	14.3517	14.2215	15.8496	15.8114	15.943	12.7282	12.1565	14.7057	15.8005	16.2264	15.7223	14.8094	14.0031	12.4712	15.7627	15.2774
Abca9	Q8K449	Q8K449	ATP-binding cassette sub-family A member 9	0	-1	0	0.961385	0.892337	0.703778	0.584251	-0.0568133	-0.16434	-0.506807	-0.77534	0.51409	0.0285859	0.0062815	0.000656475	3	3	3	3	3	3	3	3	21.1055	21.0559	21.1013	21.1861	20.9618	20.9443	21.418	21.5612	21.5201	21.3238	21.3823	21.3002	21.7436	21.6866	21.6091	21.2443	20.9975	21.277	21.3349	21.1795	21.1036	20.4929	20.4518
Abcb10	Q9JI39	Q9JI39	ATP-binding cassette sub-family B member 10, mitochondrial	0	0	0	1.39987	0.56181	0.431222	0.622436	0.485297	-0.831847	-1.2135	-0.684003	0.692945	0.237102	0.00175028	0.208935	3	3	3	3	3	3	3	3	16.1584	16.024	12.7548	15.9509	15.3814	15.0608	16.1991	16.0105	16.1691	15.6721	16.0845	14.1266	15.8814	15.7122	16.1008	14.668	14.8974	14.4885	15.2042	15.1563	15.6852	14.1169	14.3759
Abcb11	Q9QY30	Q9QY30	Bile salt export pump	0	0	0	0.453092	0.771376	0.915495	0.300606	-1.14213	-0.374493	-0.127377	-1.73406	NaN	0.0225019	0.644947	NaN	1	2	3	3	3	3	3	2	15.1272	NaN	NaN	13.832	14.1382	NaN	15.9933	15.9438	16.1901	15.7363	15.7421	15.5253	15.8836	15.9139	16.1733	16.2887	15.838	15.462	15.8762	20.6101	15.7791	NaN	15.3193
Abcb1a	P21447	P21447	Multidrug resistance protein 1A	0	0	0	1.08469	0.75475	0.616049	1.18659	0.11728	-0.40593	-0.698883	0.246827	0.420717	0.0696937	0.00270022	0.17964	3	3	3	3	3	3	3	3	17.5331	17.8737	17.6608	17.6431	17.8468	17.9296	18.8113	18.7376	19.1464	18.5299	18.2916	18.656	19.0756	19.248	19.3847	18.6464	18.505	18.4603	18.6942	18.3791	18.8721	18.9736	18.8077
Abcb1b	P06795	P06795	Multidrug resistance protein 1B	0	1	0	0.978138	1.52784	1.65229	2.26794	-0.03189	0.61149	0.724463	1.18138	0.948585	0.148167	0.00101891	0.00778276	3	3	3	3	3	3	3	3	14.8188	14.4309	15.8606	15.3673	14.7709	14.8764	16.3848	15.2744	16.0897	16.5771	16.6371	16.3691	16.0756	16.2206	16.0996	16.9833	16.8506	16.7353	15.819	15.2145	15.1326	16.7518	16.5558
Abcb4	P21440	P21440	Phosphatidylcholine translocator ABCB4	0	0	0	1.14468	1.47333	0.796097	0.681025	0.194947	0.559083	-0.328983	-0.55422	0.418555	0.414677	0.109308	0.201994	3	3	3	3	3	3	3	3	13.4563	14.0531	14.1358	14.0223	14.1323	14.0754	13.4477	15.5624	14.548	15.0338	14.9813	15.2203	15.1242	15.2601	15.2152	15.1767	14.6726	14.7632	14.5757	15.3409	15.281	13.9814	14.7105
Abcb5	B5X0E4	B5X0E4	ATP-binding cassette sub-family B member 5	0	0	0	1.40886	1.66425	1.0048	0.893465	0.494533	0.734873	0.00690333	-0.162517	NaN	NaN	NaN	0.303794	2	3	1	3	3	2	3	3	NaN	14.4129	13.4247	15.1408	13.896	14.2032	NaN	14.922	NaN	15.3348	15.3715	16.2645	16.4736	16.4871	16.3605	NaN	16.7952	16.0994	17.4578	17.478	17.2959	17.2307	17.0403
Abcb6	Q9DC29	Q9DC29	ATP-binding cassette sub-family B member 6, mitochondrial	0	0	0	0.993425	1.55776	1.02819	1.42332	-0.00951667	0.63947	0.04011	0.509263	0.962842	0.0100372	0.688237	0.0279837	3	3	3	3	3	3	3	3	13.7923	14.0479	14.1771	13.7156	14.2512	14.0219	15.4422	15.5996	15.8649	16.199	16.4026	16.2235	15.5747	15.7319	15.8893	15.74	15.8077	15.7683	15.2014	14.921	15.2807	15.6404	15.4645
Abcb7	Q61102	Q61102	ATP-binding cassette sub-family B member 7, mitochondrial	0	0	0	0.915361	0.68861	0.80018	0.895966	-0.127587	-0.53824	-0.321603	-0.158483	0.0780338	0.00535988	0.0664133	0.0821002	3	3	3	3	3	3	3	3	16.739	16.8774	16.7598	16.675	16.7153	16.6032	18.4635	18.5335	18.7426	18.1033	17.9409	18.0806	18.3956	18.2537	18.6885	18.1159	18.1129	18.1442	17.7038	17.6908	17.7036	17.4254	17.5349
Abcb8	Q9CXJ4	Q9CXJ4	ATP-binding cassette sub-family B member 8, mitochondrial	0	0	0	1.11031	0.417217	0.855253	1.17196	0.15096	-1.26113	-0.225577	0.228927	0.136461	0.00441777	0.601435	0.164111	3	3	3	3	3	3	3	3	13.9748	14.029	13.8642	14.0269	14.058	14.2359	16.7596	16.5771	17.2596	15.6926	15.4528	15.6675	16.3971	15.8386	17.1349	16.4002	16.325	15.9686	15.7688	15.7547	16.114	16.2194	15.9923
Abcb9	Q9JJ59	Q9JJ59	ATP-binding cassette sub-family B member 9	0	0	0	0.49007	1.18633	0.958941	1.37702	-1.02894	0.24651	-0.0604867	0.461547	NaN	0.624316	0.883278	NaN	1	1	3	3	3	3	3	1	NaN	NaN	13.6565	NaN	12.6276	NaN	14.3702	13.9639	15.1108	15.3657	14.4907	14.328	14.642	13.6325	14.5989	14.4033	14.4613	13.8274	13.4817	13.8069	13.461	NaN	14.0447
Abcc1	O35379	O35379	Multidrug resistance-associated protein 1	0	0	0	1.13021	0.812632	0.911259	0.798498	0.176593	-0.299327	-0.134067	-0.32464	0.0899244	0.301759	0.262689	0.00444232	3	3	3	3	3	3	3	3	14.2618	14.3677	14.4541	14.4427	14.5324	14.6383	15.1459	15.1554	15.3216	15.1819	14.417	15.126	15.4377	15.4557	15.4887	15.2393	15.2109	15.5297	14.95	14.8589	14.9058	14.6792	14.5362
Abcc3	B2RX12	B2RX12	Canalicular multispecific organic anion transporter 2	0	0	0	1.0054	0.933602	0.797342	0.895687	0.00776667	-0.09912	-0.32673	-0.158933	0.908681	0.130951	0.0239359	0.188897	3	3	3	3	3	3	3	3	17.4026	17.3323	17.4919	17.4999	17.3985	17.3517	18.5397	18.6287	18.6643	18.4482	18.576	18.5112	18.6566	18.7166	18.6641	18.3889	18.181	18.4872	18.3836	18.304	18.298	17.9781	18.2877
Abcd1	P48410	P48410	ATP-binding cassette sub-family D member 1	0	0	0	0.974671	1.19883	0.987113	0.850728	-0.0370133	0.261627	-0.0187133	-0.23323	0.798776	0.034857	0.850163	0.00736281	3	3	3	3	3	3	3	3	16.5758	16.5563	16.2723	16.2471	16.5564	16.4898	17.438	17.5843	17.3013	17.7267	17.7104	17.6714	17.8748	18.0063	17.7254	17.8916	17.899	17.7597	17.6801	17.6157	17.6177	17.3658	17.3608
Abcd2	Q61285	Q61285	ATP-binding cassette sub-family D member 2	0	1	0	2.37073	0.458995	1.63997	2.25598	1.24533	-1.12345	0.71367	1.17375	0.413006	0.634222	0.00945765	0.00873272	3	3	3	3	3	3	3	3	14.6374	13.4981	13.6389	17.8028	13.8339	13.8737	14.9378	20.8863	13.9225	15.9339	15.2392	15.2032	15.3821	15.3958	15.5859	16.3911	16.1968	15.9169	15.3817	15.7587	14.9494	16.6671	16.5326
Abcd3	P55096	P55096	ATP-binding cassette sub-family D member 3	0	0	0	1.0851	1.0828	1.04323	1.32616	0.117833	0.114767	0.06106	0.407257	0.172969	0.370177	0.593141	2.33103e-05	3	3	3	3	3	3	3	3	17.2246	17.3935	17.171	17.3514	17.428	17.3633	18.4627	18.5657	18.6081	18.4927	18.6335	18.8544	18.7715	18.8083	18.9558	18.9701	19.0183	18.7305	18.0858	18.1064	18.1358	18.538	18.5026
Abcd4	O89016	O89016	ATP-binding cassette sub-family D member 4	0	0	0	1.00176	0.988987	0.855257	0.863122	0.00254	-0.0159767	-0.22557	-0.212363	0.991318	0.9114	0.136791	0.495036	3	3	3	3	3	3	3	3	14.7966	14.8545	14.9808	15.1822	14.4698	14.9875	15.9256	15.7648	15.4667	15.6998	15.6865	15.7229	16.0028	15.9848	15.7744	15.5109	15.7355	15.8388	14.9828	15.9488	15.5085	15.1797	15.2814
Abce1	P61222	P61222	ATP-binding cassette sub-family E member 1	0	0	0	0.985176	0.918907	0.964792	0.970646	-0.0215467	-0.12201	-0.05171	-0.0429833	0.808128	0.0147855	0.192002	0.679364	3	3	3	3	3	3	3	3	18.1069	18.1078	18.2099	18.271	18.0354	18.0535	19.5488	19.6403	19.5844	19.4912	19.4456	19.4707	19.677	19.6341	19.5756	19.5706	19.5552	19.6058	19.0073	18.9606	19.1917	18.9455	18.943
Abcf1	Q6P542	Q6P542	ATP-binding cassette sub-family F member 1	0	0	0	1.10357	0.142758	0.180394	0.437215	0.142183	-2.80836	-2.47077	-1.19359	0.56151	0.00104148	0.0166788	0.0166104	3	3	3	3	3	3	3	3	18.3884	18.5932	18.6805	18.4043	18.5867	19.0977	23.14	22.5087	23.6123	20.4298	20.2511	20.1551	21.9257	21.1513	23.1571	20.0463	19.3725	19.4029	19.1685	19.0691	20.0081	18.1434	18.2258
Abcf2	Q99LE6	Q99LE6	ATP-binding cassette sub-family F member 2	0	0	0	1.01431	1.28563	1.06667	0.942556	0.0205	0.36247	0.09311	-0.08535	0.694708	0.0103827	0.294378	0.635793	3	3	3	3	3	3	3	3	16.156	16.2179	16.1783	16.2839	16.2021	16.1277	16.2174	16.0902	16.0278	16.4893	16.5642	16.3693	16.5984	16.7728	16.7255	16.756	16.7162	16.9037	16.1033	15.9037	16.3116	16.1645	16.1114
Abcf3	Q8K268	Q8K268	ATP-binding cassette sub-family F member 3	0	0	0	1.06756	0.998236	0.934744	0.723942	0.0943133	-0.00254667	-0.0973567	-0.466053	0.262812	0.973357	0.39329	0.0175648	3	3	3	3	3	3	3	3	15.1346	14.9068	14.9585	15.0562	15.0936	15.1331	15.8731	16.0736	15.8612	15.9089	15.9724	15.9189	16.3115	16.5554	16.4256	16.3144	16.2166	16.4693	16.0035	15.7976	16.1739	15.4953	15.6226
Abcg1	Q64343	Q64343	ATP-binding cassette sub-family G member 1	0	0	0	1.91025	1.24711	1.39883	1.14096	0.93376	0.31859	0.484217	0.190253	0.115492	0.100942	0.0239453	0.8352	3	3	3	3	3	3	3	3	14.1165	12.7568	13.8405	14.5095	14.1363	14.8692	15.5762	15.5507	15.6298	15.7322	16.1992	15.7811	15.1376	15.4821	15.461	16.0021	15.7562	15.7751	14.4218	14.5615	14.1056	12.8611	15.4402
Abcg2	Q7TMS5	Q7TMS5	ATP-binding cassette sub-family G member 2	0	0	0	1.02099	0.92069	1.00057	0.91006	0.02997	-0.119213	0.00082	-0.135967	0.719414	0.13076	0.993145	0.401118	3	3	3	3	3	3	3	3	16.2268	16.1833	15.9767	16.1727	16.1628	16.1412	16.698	16.7734	16.7896	16.5221	16.6879	16.6932	16.776	16.9996	16.9441	16.7929	16.9369	16.9923	16.5678	16.3927	16.7011	16.6355	16.2498
Abcg3	Q99P81	Q99P81	ATP-binding cassette sub-family G member 3	0	0	1	0.544389	0.950646	1.95415	4.25247	-0.87729	-0.07302	0.966543	2.0883	NaN	0.651528	0.0712844	0.000763565	1	1	3	3	3	3	3	3	NaN	12.8729	NaN	NaN	NaN	11.9956	18.797	18.4992	18.6706	18.5369	18.397	18.8139	18.0416	17.639	18.67	19.2607	19.4161	18.5734	17.8361	17.7661	18.4539	20.0311	20.0692
Abhd10	Q6PE15	Q6PE15	Mycophenolic acid acyl-glucuronide esterase, mitochondrial	0	0	0	1.03321	0.433384	0.68338	0.805215	0.04714	-1.20628	-0.54924	-0.312553	0.157032	0.00624215	0.134743	0.139005	3	3	3	3	3	3	3	3	15.5051	15.444	15.4637	15.5482	15.5265	15.4795	17.2377	17.0655	17.732	16.2897	15.919	16.2076	17.1958	16.7464	17.5928	16.7864	16.7969	16.304	16.0539	16.1828	16.1788	16.0192	15.4994
Abhd11	Q8K4F5	Q8K4F5	Protein ABHD11	0	0	0	0.985447	0.349808	0.565959	0.919214	-0.02115	-1.51536	-0.82123	-0.121527	0.950974	0.0189568	0.0640753	0.728929	3	3	3	3	3	3	3	3	15.6173	14.9318	15.4348	15.8031	15.0062	15.1111	16.2378	16.2898	16.6989	15.2164	14.1551	15.3088	16.5112	16.0036	17.1125	15.6352	15.7802	15.7482	15.4354	15.0076	15.8947	15.5945	14.9265
Abhd12	Q99LR1	Q99LR1	Monoacylglycerol lipase ABHD12	0	0	0	0.950942	1.33394	1.25822	1.28942	-0.07257	0.415697	0.33138	0.366723	0.269169	0.00135224	0.0348959	0.0113526	3	3	3	3	3	3	3	3	22.4766	22.4036	22.4564	22.4672	22.3649	22.2867	23.0738	23.0991	22.9746	23.5336	23.4482	23.4127	23.2982	23.4978	23.1892	23.5962	23.6146	23.7685	22.9028	22.9558	22.8167	23.3704	23.281
Abhd14b	Q8VCR7	Q8VCR7	Protein ABHD14B	0	0	0	1.0073	1.00133	0.919234	0.935976	0.0104967	0.00192	-0.121497	-0.0954567	0.834975	0.965098	0.266409	0.426441	3	3	3	3	3	3	3	3	18.4931	18.4337	18.5604	18.5486	18.4487	18.5215	19.5142	19.4845	19.398	19.4647	19.4308	19.507	19.7082	19.7187	19.4686	19.4186	19.5397	19.5726	19.5639	19.7295	19.5582	19.705	19.4472
Abhd15	Q5F2F2	Q5F2F2	Protein ABHD15	0	-1	0	1.06871	1.01111	0.650887	0.397672	0.09587	0.01594	-0.61952	-1.33035	0.17703	0.85297	0.0119056	0.000231393	3	3	3	3	3	3	3	3	17.7258	17.7411	17.5633	17.7712	17.7491	17.7976	18.8003	18.9018	18.6503	18.7321	18.84	18.8283	19.3115	19.4354	19.1456	18.6255	18.5121	18.8963	18.8013	18.8303	19.0195	17.7073	17.4334
Abhd16a	Q9Z1Q2	Q9Z1Q2	Protein ABHD16A	0	0	0	1.20242	0.744058	0.821182	0.824972	0.265947	-0.426513	-0.284227	-0.277583	0.0955814	0.0675651	0.100555	0.0184793	3	3	3	3	3	3	3	3	16.7765	16.4334	16.4262	16.8637	16.8383	16.7318	17.2721	17.1902	17.53	17.0758	16.6325	17.0044	17.6348	17.5938	17.8959	17.3367	17.3226	17.6125	17.4356	17.2846	17.3915	17.2023	17.0648
Abhd17b	Q7M759	Q7M759	Protein ABHD17B	0	0	0	1.07774	0.793847	0.916676	1.30865	0.108003	-0.333067	-0.125517	0.388077	0.368453	0.102748	0.598575	0.148847	3	3	3	3	3	3	3	3	13.4922	13.5579	13.493	13.775	13.4227	13.6695	15.3	15.0138	15.5545	14.9773	14.9084	14.9834	15.1771	14.7874	15.4915	15.1232	15.0946	14.8617	14.4172	14.3896	14.9517	14.8238	14.893
Abhd3	Q91ZH7	Q91ZH7	Phospholipase ABHD3	0	0	0	NaN	0.51617	0.165779	2.66505	NaN	-0.954082	-2.59266	1.41416	NaN	NaN	0.0798992	NaN	0	2	3	2	3	3	1	3	NaN	NaN	NaN	NaN	14.4446	15.1442	17.7587	13.947	15.4775	13.5038	NaN	16.0435	17.7533	14.7719	16.3715	12.5698	13.5626	14.9864	NaN	NaN	15.1538	16.6553	16.5695
Abhd4	Q8VD66	Q8VD66	Protein ABHD4	0	0	0	0.988921	0.985058	0.8578	1.0445	-0.0160733	-0.02172	-0.221287	0.06281	0.871833	0.838493	0.010607	0.357655	3	3	3	3	3	3	3	3	16.0049	15.9623	15.9984	16.1541	15.9125	15.8508	16.5201	16.7106	16.7625	16.7664	16.5343	16.6272	16.8911	16.9586	16.902	16.7067	16.7666	16.6146	16.1071	16.0504	15.9639	16.0551	16.0638
Abhd6	Q8R2Y0	Q8R2Y0	Monoacylglycerol lipase ABHD6	0	0	0	1.01091	0.784421	1.10634	1.36113	0.0156567	-0.3503	0.1458	0.444803	0.835201	0.00569942	0.401156	0.0547783	3	3	3	3	3	3	3	3	15.4163	15.4053	15.42	15.3016	15.5443	15.4427	16.8868	16.7793	16.892	16.5072	16.4074	16.5926	16.5733	16.5045	16.9813	16.8504	16.8987	16.7473	16.166	16.2659	16.6882	16.796	16.7588
Abi1	Q8CBW3	Q8CBW3	Abl interactor 1	0	0	-1	1.05091	0.964527	0.849145	0.700267	0.0716333	-0.0521067	-0.235917	-0.514023	0.456171	0.244398	0.0905872	0.00563396	3	3	3	3	3	3	3	3	17.9612	18.0343	18.0153	18.2424	17.975	18.0083	19.0377	19.0578	19.0276	18.9146	19.0282	19.0239	19.4764	19.4584	19.1792	19.2017	19.1552	19.0492	18.8678	19.0052	18.9518	18.5917	18.3004
Abi2	P62484	P62484	Abl interactor 2	0	0	0	1.57683	0.66055	0.638204	0.84468	0.657027	-0.59826	-0.64791	-0.243523	0.141128	0.0119902	0.0109259	0.194915	3	3	3	3	3	3	3	3	16.7088	15.9044	16.4058	17.5394	16.7022	16.7484	18.5272	18.3711	18.7381	18.1193	17.8484	17.8739	18.5177	18.2676	18.473	17.7428	17.5758	17.9959	17.0974	16.8523	17.372	16.7759	16.9219
Abi3	Q8BYZ1	Q8BYZ1	ABI gene family member 3	0	0	-1	1.00426	1.05359	0.900778	0.517052	0.00614	0.07532	-0.150757	-0.95162	0.956128	0.472291	0.439498	0.00143703	3	3	3	3	3	3	3	3	21.4992	21.3146	21.446	21.6048	21.3367	21.3367	21.8574	22.0554	21.7718	21.9131	21.9398	22.0577	22.3967	22.3676	21.8882	21.9666	22.0563	22.1774	21.8259	21.9848	21.8273	21.1294	20.7528
Abl1	P00520	P00520	Tyrosine-protein kinase ABL1	0	0	0	0.947692	1.09186	0.817366	1.0342	-0.07751	0.12679	-0.290947	0.0485167	0.511883	0.194771	0.0391706	0.814044	3	3	3	3	3	3	3	3	18.7137	18.6725	18.7074	18.83	18.4779	18.5532	20.1167	20.2419	20.1033	20.176	20.2567	20.4096	20.2527	20.2482	19.9715	19.8452	19.8377	19.9167	19.3285	19.3926	19.1028	19.6564	19.0826
Abl2	Q4JIM5	Q4JIM5	Abelson tyrosine-protein kinase 2	0	0	0	1.03669	0.944383	0.736001	0.204697	0.05199	-0.0825567	-0.44222	-2.28844	0.704479	0.85714	0.432654	0.0305984	3	3	3	3	3	3	3	3	14.1916	13.8352	13.7947	13.959	14.026	13.9924	15.0975	14.9823	16.009	15.6132	15.5084	14.7195	15.7368	15.9016	15.7967	14.8667	14.862	16.3797	15.4989	15.5082	15.4779	11.8211	14.0524
Abr	Q5SSL4	Q5SSL4	Active breakpoint cluster region-related protein	0	0	0	1.0679	0.796802	1.07781	1.3009	0.09477	-0.327707	0.1081	0.37951	0.327991	0.133676	0.602775	0.047184	3	3	3	3	3	3	3	3	16.4865	16.4644	16.722	16.6949	16.6286	16.6337	18.3727	17.9571	18.5282	17.912	17.9301	18.0328	18.0523	18.0437	18.4464	18.5102	18.3213	18.0351	17.4939	17.4171	17.5064	17.6053	18.0517
Abracl	Q4KML4	Q4KML4	Costars family protein ABRACL	0	0	0	0.83666	1.33337	1.05201	0.988025	-0.257287	0.415073	0.0731433	-0.01738	0.0934721	0.0119225	0.727397	0.830689	3	3	3	3	3	3	3	3	20.0522	20.0448	20.1521	20.0492	19.6968	19.7313	19.5515	19.608	19.3158	19.9177	19.8476	19.9551	20.2443	19.8358	19.6121	20.0951	19.9267	19.8898	19.2981	19.1271	19.1994	19.3018	19.1634
Acaa1a	Q921H8	Q921H8	3-ketoacyl-CoA thiolase A, peroxisomal	0	0	0	0.946114	1.06163	0.947355	0.917896	-0.0799133	0.0862767	-0.0780233	-0.123597	0.106101	0.439891	0.597135	0.542136	3	3	3	3	3	3	3	3	19.5261	19.5422	19.6356	19.4996	19.4533	19.5112	19.7319	19.6282	19.6085	19.9283	19.6605	19.6386	20.1453	20.2675	19.8202	19.9978	20.0466	19.9546	19.6548	19.8258	19.447	19.7425	19.5803
Acaa2	Q8BWT1	Q8BWT1	3-ketoacyl-CoA thiolase, mitochondrial	0	0	0	1.16177	0.531691	0.846417	0.978233	0.216323	-0.91134	-0.24056	-0.03175	0.0053346	0.00185565	0.0589017	0.732877	3	3	3	3	3	3	3	3	18.637	18.6923	18.7231	18.9447	18.9141	18.8427	20.1473	19.8845	20.2364	19.0586	19.2863	19.1894	19.9551	19.7965	20.1137	19.7041	19.7102	19.7292	18.7334	18.6198	18.5318	18.5742	18.7172
Acaca	Q5SWU9	Q5SWU9	Acetyl-CoA carboxylase 1	1	0	0	3.16829	1.61589	4.01093	11.6198	1.6637	0.692327	2.00394	3.53851	0.371775	0.0321521	0.00395365	0.00369712	3	3	3	3	3	3	3	3	14.1333	14.1403	14.1341	19.1097	14.078	14.2112	15.8262	15.4476	16.0499	16.6569	16.2357	16.5082	15.7497	15.3487	16.3741	18.0124	17.9494	17.5226	14.8772	14.7074	15.0506	19.5622	17.8962
Acacb	E9Q4Z2	E9Q4Z2	Acetyl-CoA carboxylase 2	0	0	0	NaN	1.68262	NaN	24.3717	NaN	0.75071	NaN	4.60714	NaN	NaN	NaN	NaN	0	0	1	3	0	3	2	3	0.212661	NaN	NaN	NaN	NaN	NaN	NaN	NaN	14.001	14.6789	14.6199	14.9563	0.135476	NaN	NaN	16.4311	16.3667	15.7591	12.794	NaN	12.5167	17.4113	17.1391
Acad10	Q8K370	Q8K370	Acyl-CoA dehydrogenase family member 10	0	0	0	1.00683	1.34267	1.12503	1.48846	0.00982667	0.425107	0.169963	0.57382	0.8503	0.0175029	0.147993	0.0262565	3	3	3	3	3	3	3	3	16.1817	16.1819	16.2134	16.2831	16.2052	16.1181	16.6047	16.5944	16.2839	16.8661	16.9609	16.9313	17.3756	17.5145	17.4961	17.5627	17.8	17.5335	17.0822	17.105	17.0477	17.3537	17.9269
Acad8	Q9D7B6	Q9D7B6	Isobutyryl-CoA dehydrogenase, mitochondrial	0	0	0	1.20827	0.808082	0.907198	0.915247	0.272943	-0.307427	-0.14051	-0.127767	0.00437938	0.0132922	0.205616	0.131842	3	3	3	3	3	3	3	3	18.3398	18.3841	18.4059	18.5686	18.7141	18.6659	19.3597	19.3711	19.5401	19.202	19.0812	19.0654	19.2813	19.2317	19.3376	19.0473	19.0632	19.3186	18.6815	18.7599	18.7375	18.4763	18.63
Acad9	Q8JZN5	Q8JZN5	Acyl-CoA dehydrogenase family member 9, mitochondrial	0	0	0	1.0445	0.626044	0.785077	0.919172	0.0628133	-0.675663	-0.349093	-0.121593	0.472113	0.0048271	0.0711453	0.261658	3	3	3	3	3	3	3	3	17.8756	17.9409	17.9365	18.1276	17.9422	17.8716	19.1656	19.3333	19.5385	18.7563	18.5777	18.6764	19.0941	19.0422	19.4844	18.8321	18.92	18.8214	18.6767	18.6048	18.468	18.4197	18.3665
Acadl	P51174	P51174	Long-chain specific acyl-CoA dehydrogenase, mitochondrial	0	0	0	0.977964	0.705597	0.896938	1.05705	-0.0321467	-0.503083	-0.15692	0.08004	0.684416	0.00700157	0.25852	0.581286	3	3	3	3	3	3	3	3	19.8188	20.0464	19.9921	19.8749	19.966	19.92	21.4269	21.3343	21.5762	21.0776	20.9017	20.8489	21.356	21.2675	21.6413	21.2208	21.3418	21.2314	20.6099	20.5881	20.3802	20.383	20.7273
Acadm	P45952	P45952	Medium-chain specific acyl-CoA dehydrogenase, mitochondrial	0	0	0	0.998502	0.892483	0.845309	0.811168	-0.00216333	-0.164103	-0.24245	-0.301927	0.980936	0.00162331	0.0292117	0.0190823	3	3	3	3	3	3	3	3	20.2836	20.182	20.0611	20.274	20.1647	20.0815	20.9149	20.9315	20.8849	20.7343	20.7252	20.7795	21.2312	21.2354	21.0223	20.8881	20.9542	20.9193	20.691	20.8427	20.6499	20.5002	20.4558
Acads	Q07417	Q07417	Short-chain specific acyl-CoA dehydrogenase, mitochondrial	0	0	0	0.913268	1.00525	0.851519	0.743013	-0.13089	0.00755333	-0.23189	-0.42854	0.200963	0.897935	0.125637	0.0064375	3	3	3	3	3	3	3	3	20.6167	20.4956	20.5803	20.5867	20.3785	20.3347	21.139	21.1052	20.9742	21.1236	21.0448	21.0727	21.3018	21.2843	21.0292	20.8591	20.9292	21.1313	20.8188	21.0006	20.774	20.4996	20.4569
Acadsb	Q9DBL1	Q9DBL1	Short/branched chain specific acyl-CoA dehydrogenase, mitochondrial	0	0	0	0.970605	0.76724	0.833727	0.899809	-0.0430433	-0.38225	-0.262353	-0.15231	0.512513	0.0178878	0.0078207	0.176414	3	3	3	3	3	3	3	3	17.2493	17.1603	17.1748	17.0501	17.2301	17.1751	18.4391	18.2622	18.5236	18.1381	18.0144	17.9257	18.5175	18.4029	18.5206	18.2095	18.2848	18.1597	17.6869	17.8695	17.5807	17.5938	17.4825
Acadvl	P50544	P50544	Very long-chain specific acyl-CoA dehydrogenase, mitochondrial	0	0	0	1.05541	0.783177	0.757232	0.950156	0.0778067	-0.35259	-0.401193	-0.0737633	0.375019	0.0107243	0.0504183	0.533981	3	3	3	3	3	3	3	3	18.4329	18.3446	18.3714	18.6073	18.3972	18.3777	19.4702	19.3907	19.6103	19.0959	19.0907	19.2268	19.4131	19.6325	19.7656	19.0623	19.144	19.4014	19.1553	19.3049	19.0441	19.0214	19.0116
Acap2	Q6ZQK5	Q6ZQK5	Arf-GAP with coiled-coil, ANK repeat and PH domain-containing protein 2	0	0	0	0.95004	1.0314	1.00708	0.818849	-0.07394	0.0446	0.0101733	-0.28833	0.271455	0.402466	0.87034	0.0021751	3	3	3	3	3	3	3	3	18.4569	18.5152	18.5786	18.5329	18.4159	18.3801	19.4603	19.57	19.4969	19.5017	19.6206	19.5388	19.6981	19.8163	19.6769	19.719	19.6861	19.8167	19.436	19.4566	19.4415	19.1279	19.1047
Acat1	Q8QZT1	Q8QZT1	Acetyl-CoA acetyltransferase, mitochondrial	0	0	0	1.00661	0.613856	0.728121	0.767252	0.00951	-0.704027	-0.45775	-0.382227	0.91589	0.0168461	0.052284	0.019794	3	3	3	3	3	3	3	3	20.7131	20.5702	20.713	20.8025	20.6607	20.5616	22.0034	21.6154	22.1459	21.3794	21.1175	21.1557	21.5861	21.3372	21.9151	21.1684	21.1522	21.1445	20.664	20.7073	20.8117	20.4232	20.4505
Acat2	Q8CAY6	Q8CAY6	Acetyl-CoA acetyltransferase, cytosolic	0	0	0	1.0458	0.938601	1.20204	0.940448	0.0646067	-0.0914167	0.26548	-0.08858	0.809081	0.720042	0.236245	0.724849	3	3	3	3	3	3	3	3	15.9449	16.4059	16.7989	16.5056	16.3662	16.4717	18.4872	17.9735	18.7209	18.3817	18.3989	18.1268	17.2434	17.4691	17.7062	17.9552	17.7722	17.4876	15.9763	15.6431	16.1108	15.5857	16.195
Acbd3	Q8BMP6	Q8BMP6	Golgi resident protein GCP60	0	0	1	0.985397	1.2743	1.40379	1.55673	-0.0212233	0.349703	0.489327	0.638517	0.772507	0.0750785	0.0316131	0.00413576	3	3	3	3	3	3	3	3	16.6296	16.6595	16.4969	16.4809	16.6102	16.6313	17.7897	17.4421	17.5129	18.114	17.9133	17.7665	17.8475	18.0566	17.7631	18.5002	18.5029	18.132	16.979	17.2819	17.3174	17.8351	17.8054
Acbd5	Q5XG73	Q5XG73	Acyl-CoA-binding domain-containing protein 5	0	0	0	1.08912	1.15777	1.12129	1.31771	0.123167	0.211343	0.165157	0.39803	0.219448	0.0625241	0.138433	0.00829459	3	3	3	3	3	3	3	3	15.3125	15.2837	15.0885	15.3523	15.4326	15.2694	16.2954	16.4802	16.4269	16.4923	16.6965	16.6478	16.884	17.0639	16.9602	17.1467	17.2539	17.0031	16.4924	16.72	16.5568	16.9952	17.0637
Acbd6	Q9D061	Q9D061	Acyl-CoA-binding domain-containing protein 6	0	0	0	0.890405	1.0015	0.88542	1.01756	-0.167467	0.00216	-0.175567	0.0251133	0.478139	0.982721	0.139459	0.503754	3	3	3	3	3	3	3	3	15.6075	15.5779	15.6072	15.607	15.6791	15.004	16.0719	16.2264	16.0158	16.2343	15.9953	16.091	16.2561	16.341	16.575	16.211	16.2167	16.2178	15.5726	15.6205	15.6005	15.5608	15.6478
Accs	A2AIG8	A2AIG8	1-aminocyclopropane-1-carboxylate synthase-like protein 1	0	0	0	0.962303	1.14593	0.99734	0.976499	-0.0554367	0.196517	-0.00384333	-0.03431	0.662765	0.0424018	0.982397	0.72863	3	3	3	3	3	3	3	3	16.3831	16.7683	16.6736	16.5457	16.5193	16.5938	17.5264	17.5878	17.5277	17.6281	17.8478	17.7555	17.6014	17.8526	17.5225	17.4043	17.7207	17.84	17.229	17.1858	17.344	17.2344	17.0743
Acer3	Q9D099	Q9D099	Alkaline ceramidase 3	0	0	0	0.805718	1.32676	1.14549	1.97801	-0.311653	0.40791	0.19596	0.984047	0.317461	0.046586	0.333435	0.00551789	3	3	3	3	3	3	3	3	16.2169	16.0501	16.2048	15.8662	16.2988	15.3719	15.1953	14.9633	15.3433	15.4196	15.7354	15.5707	15.7988	15.9843	15.92	16.1559	15.7779	16.3572	15.2251	14.6861	14.9423	15.7577	15.9841
Acin1	Q9JIX8	Q9JIX8	Apoptotic chromatin condensation inducer in the nucleus	0	0	0	1.00044	0.95694	1.59754	1.41123	0.000633333	-0.0635	0.675853	0.496957	0.997665	0.720889	0.0217759	0.0748798	3	3	3	3	3	3	3	3	17.5647	17.5315	16.9906	17.3871	17.4918	17.2099	18.3682	18.9138	18.7675	18.6008	18.5818	18.6765	18.1092	18.1468	18.4781	19.0918	19.0341	18.6358	17.9075	18.4557	18.3712	18.9756	18.6593
Acly	Q91V92	Q91V92	ATP-citrate synthase	0	0	0	0.866799	0.891869	0.983014	1.16723	-0.20623	-0.165097	-0.0247167	0.223093	0.0522698	0.171373	0.889315	0.0267019	3	3	3	3	3	3	3	3	19.4713	19.6779	19.6619	19.3989	19.4589	19.3346	20.5241	20.3685	20.627	20.4462	20.355	20.2231	20.6493	20.5211	21.0283	20.8439	20.6459	20.6349	20.0618	20.0271	20.1555	20.2769	20.2304
Aco1	P28271	P28271	Cytoplasmic aconitate hydratase	0	0	0	0.949858	0.991194	1.02909	1.05196	-0.0742167	-0.01276	0.0413667	0.0730867	0.145063	0.720913	0.200106	0.227467	3	3	3	3	3	3	3	3	19.1256	19.1175	19.2256	19.1221	19.0772	19.0467	19.8662	19.8843	19.8618	19.8708	19.9069	19.7963	19.9078	19.9154	19.8795	19.9877	19.9362	19.9029	19.5312	19.5567	19.4629	19.5166	19.588
Aco2	Q99KI0	Q99KI0	Aconitate hydratase, mitochondrial	0	0	0	1.03518	0.40427	0.657295	0.956604	0.0498833	-1.30661	-0.605387	-0.0640067	0.193965	0.00237063	0.134247	0.555928	3	3	3	3	3	3	3	3	21.5553	21.6476	21.6216	21.6844	21.628	21.6618	23.9274	23.6346	24.2476	22.742	22.4993	22.6484	23.4651	22.9757	24.0427	22.9958	22.9748	22.6967	22.5074	22.5487	22.8071	22.6239	22.5129
Acot1	O55137	O55137	Acyl-coenzyme A thioesterase 1	0	0	0	1.07445	0.630311	0.80884	1.0231	0.103597	-0.665863	-0.306073	0.03295	0.117088	0.0236354	0.0948945	0.833847	3	3	3	3	3	3	3	3	18.6844	18.6877	18.7824	18.8959	18.8145	18.7549	19.91	19.612	20.1626	19.4163	19.0823	19.1883	19.5765	19.4315	19.8648	19.2408	19.2789	19.4348	18.9141	18.8784	18.7897	18.674	19.1607
Acot11	Q8VHQ9	Q8VHQ9	Acyl-coenzyme A thioesterase 11	0	0	1	0.866539	0.619125	0.83839	3.17185	-0.206663	-0.691697	-0.254307	1.66532	0.717269	0.0346169	0.537856	0.0214094	3	3	3	3	3	3	3	3	12.7261	13.0155	14.4453	13.1637	13.2045	13.1987	15.5523	15.2142	15.7438	14.967	14.9685	14.4998	14.9332	14.5842	15.761	14.8748	15.0696	14.571	13.2355	12.864	13.3472	15.6639	14.5019
Acot13	Q9CQR4	Q9CQR4	Acyl-coenzyme A thioesterase 13	0	0	0	1.04	0.609409	0.906463	0.937749	0.05658	-0.714517	-0.14168	-0.0927267	0.572728	0.011007	0.452885	0.410271	3	3	3	3	3	3	3	3	18.7247	18.534	18.6164	18.8238	18.5757	18.6452	20.0409	19.8007	20.0173	19.4232	18.9638	19.3285	19.6941	19.3259	19.9096	19.5132	19.4888	19.5025	19.1496	19.167	18.9112	18.8933	19.092
Acot2	Q9QYR9	Q9QYR9	Acyl-coenzyme A thioesterase 2, mitochondrial	0	0	0	0.905234	0.802135	1.42615	0.671669	-0.143637	-0.318083	0.51213	-0.574177	0.16246	0.327489	0.247845	0.363854	3	3	3	3	3	3	3	3	17.2345	17.4489	17.3393	17.2953	17.198	17.0985	17.8472	17.3147	17.5109	17.3978	16.7692	17.5516	17.5614	16.4436	17.4855	17.6595	17.8845	17.4829	16.9098	16.9461	16.3659	17.0675	15.2371
Acot7	Q91V12	Q91V12	Cytosolic acyl coenzyme A thioester hydrolase	0	0	0	1.23762	0.315131	0.539004	1.01937	0.30757	-1.66598	-0.891633	0.02768	0.175637	0.0036676	0.202302	0.933715	3	3	3	3	3	3	3	3	15.9093	16.2706	16.1334	16.1081	16.5138	16.6142	19.9721	19.6125	20.4063	18.5746	18.0618	18.3566	19.416	18.451	20.3845	18.7771	18.613	18.1865	18.0907	18.1162	18.9684	18.4854	18.1853
Acot8	P58137	P58137	Acyl-coenzyme A thioesterase 8	0	0	0	0.999815	0.895261	1.01254	1.36891	-0.000266667	-0.15962	0.0179833	0.453023	0.997917	0.518362	0.891929	0.0270889	3	3	3	3	3	3	3	3	14.9207	15.1543	14.8623	14.9077	15.0139	15.0149	16.0511	16.0382	16.1926	16.1491	15.4941	16.1598	16.1538	16.2618	16.3258	16.2532	16.4677	16.0744	15.7706	15.714	15.7807	16.4558	16.1599
Acot9	Q9R0X4	Q9R0X4	Acyl-coenzyme A thioesterase 9, mitochondrial	0	0	0	1.03894	0.74439	0.908085	1.0745	0.0551067	-0.42587	-0.1391	0.103663	0.620399	0.0753284	0.236756	0.234807	3	3	3	3	3	3	3	3	16.9246	16.8994	17.0405	17.1963	16.9154	16.9181	18.7019	18.5439	19.0193	18.5405	18.2808	18.1661	18.4789	18.2601	18.5736	18.3433	18.2244	18.3275	17.7488	17.6794	17.6167	17.6867	17.9042
Acox1	Q9R0H0	Q9R0H0	Peroxisomal acyl-coenzyme A oxidase 1	0	0	0	0.983402	0.7073	0.95512	1.39018	-0.0241467	-0.499607	-0.0662467	0.475277	0.806632	0.0321895	0.827287	0.00400957	3	3	3	3	3	3	3	3	15.0176	15.2142	14.9276	15.0649	14.955	15.067	15.9628	16.098	16.3621	15.8206	15.4696	15.6339	15.9898	15.6003	16.2488	16.0288	16.1515	15.4598	14.967	15.0837	14.9576	15.4652	15.3657
Acox3	Q9EPL9	Q9EPL9	Peroxisomal acyl-coenzyme A oxidase 3	0	1	0	0.932914	1.33258	1.57629	1.55655	-0.100183	0.414227	0.65653	0.63835	0.0803714	0.000928955	0.0142415	0.00256429	3	3	3	3	3	3	3	3	18.4055	18.3231	18.4513	18.2768	18.335	18.2675	19.0335	19.1607	19.0662	19.5318	19.5258	19.4455	19.437	19.5957	19.1261	20.0943	20.1434	19.8907	19.1998	19.4226	19.2083	20.029	19.8972
Acp1	Q9D358	Q9D358	Low molecular weight phosphotyrosine protein phosphatase	0	0	0	0.931446	0.938262	1.01617	1.22541	-0.102457	-0.0919367	0.0231433	0.29326	0.351454	0.356249	0.855481	0.0279901	3	3	3	3	3	3	3	3	18.2854	18.1479	18.2566	18.2792	18.1281	17.9752	19.1757	18.8906	19.0306	18.998	18.8882	18.9348	18.9638	18.7586	18.8238	18.9933	18.9545	18.6678	18.8976	18.9048	18.6531	19.1374	19.0582
Acp2	P24638	P24638	Lysosomal acid phosphatase	0	0	0	0.873147	1.24537	1.0094	0.95719	-0.195703	0.316573	0.0134933	-0.0631233	0.0151141	0.000907418	0.916482	0.592691	3	3	3	3	3	3	3	3	18.4328	18.4501	18.5526	18.3372	18.2333	18.278	18.6592	18.7134	18.6965	19.0148	18.9469	19.057	18.9559	19.1885	18.8825	18.9451	19.1787	18.9436	18.3682	18.4141	18.2655	18.1143	18.2852
Acp6	Q8BP40	Q8BP40	Lysophosphatidic acid phosphatase type 6	0	0	0	1.0003	0.860756	0.959825	0.852267	0.000433333	-0.216323	-0.0591567	-0.230623	0.995809	0.0507157	0.253317	0.0201897	3	3	3	3	3	3	3	3	17.5113	17.6442	17.7141	17.7232	17.5743	17.5735	18.8142	18.7053	18.9311	18.6871	18.5524	18.5622	18.6981	18.6679	18.7467	18.7209	18.6112	18.6032	18.0582	18.1314	18.1216	17.9636	17.8888
Acsbg1	Q99PU5	Q99PU5	Long-chain-fatty-acid--CoA ligase ACSBG1	0	0	1	1.34656	0.323641	0.529432	1.63036	0.429273	-1.62753	-0.917483	0.705187	0.512421	0.00115758	0.179264	0.0218115	3	3	3	3	3	3	3	3	13.1524	12.8654	14.2729	13.9629	14.5226	13.093	17.861	17.6078	18.1693	16.3408	16.0322	16.3826	17.0802	16.7483	18.3792	16.4451	16.9644	16.0458	16.1998	15.7493	16.2237	16.6261	16.6678
Acsf2	Q8VCW8	Q8VCW8	Acyl-CoA synthetase family member 2, mitochondrial	0	0	0	0.979165	1.01061	1.06122	1.17589	-0.0303767	0.01522	0.0857267	0.233757	0.742152	0.909764	0.052973	0.0756022	3	3	3	3	3	3	3	3	17.7855	17.7551	17.676	17.843	17.7155	17.5671	19.2307	18.8805	19.1689	19.2389	19.0511	19.0358	19.4878	19.4517	19.5311	19.5998	19.5328	19.5952	19.2847	19.2826	19.1251	19.6296	19.3867
Acsf3	Q3URE1	Q3URE1	Acyl-CoA synthetase family member 3, mitochondrial	0	0	0	0.897637	0.678493	1.1466	1.24807	-0.155797	-0.559593	0.197363	0.319693	0.58954	0.0248699	0.729115	0.525631	3	3	3	3	3	3	3	3	17.2906	17.0226	17.3589	16.58	17.2691	17.3556	14.6861	14.5541	14.6701	14.2699	13.772	14.1896	14.8877	16.2548	16.5443	15.8104	16.1702	16.2983	15.0065	15.3727	14.046	15.4264	15.2946
Acsl1	P41216	P41216	Long-chain-fatty-acid--CoA ligase 1	0	0	0	0.920207	0.945417	0.883221	0.953307	-0.11997	-0.0809767	-0.179153	-0.0689867	0.0289079	0.319901	0.24565	0.204494	3	3	3	3	3	3	3	3	17.899	17.9387	18.0098	17.7981	17.8461	17.8435	18.9269	19.0415	19.0778	18.8485	18.9179	19.0368	18.7302	19.057	19.1251	18.7152	18.8862	18.7735	18.6732	18.5598	18.6109	18.5847	18.483
Acsl3	Q9CZW4	Q9CZW4	Long-chain-fatty-acid--CoA ligase 3	0	0	0	1.13225	0.973755	0.750885	0.728473	0.179187	-0.03837	-0.413337	-0.457053	0.743981	0.88602	0.437984	0.306912	3	3	3	3	3	3	3	3	16.7121	15.0356	15.6091	16.2279	15.7424	15.924	17.4056	17.0996	16.5887	16.9439	17.1487	16.8861	16.7857	16.5033	16.3176	16.81	15.2476	16.3091	16.2036	17.0239	16.6589	15.9541	15.7773
Acsl4	Q9QUJ7	Q9QUJ7	Long-chain-fatty-acid--CoA ligase 4	0	0	0	0.895104	1.00386	0.88837	0.826256	-0.159873	0.00555667	-0.170767	-0.27534	0.0681136	0.915425	0.21263	0.0931954	3	3	3	3	3	3	3	3	17.4571	17.2909	17.4882	17.2922	17.2327	17.2317	18.6272	18.7259	18.6708	18.6685	18.7545	18.6175	18.7438	18.8649	18.5059	18.627	18.4942	18.481	18.633	18.4153	18.512	18.0357	18.3998
Acsl5	Q8JZR0	Q8JZR0	Long-chain-fatty-acid--CoA ligase 5	0	0	0	0.919595	1.04748	1.07037	1.19065	-0.12093	0.0669267	0.0981067	0.251747	0.0666183	0.277353	0.291853	0.0379274	3	3	3	3	3	3	3	3	18.5911	18.6026	18.6361	18.5812	18.4521	18.4337	19.6673	19.7529	19.6336	19.6985	19.7268	19.8292	19.9216	19.9777	19.7884	20.0411	20.0627	19.8782	19.4998	19.5698	19.4916	19.6735	19.7154
Acsl6	Q91WC3	Q91WC3	Long-chain-fatty-acid--CoA ligase 6	0	0	0	1.40837	0.229917	0.393052	1.28871	0.49403	-2.12081	-1.34721	0.365923	0.0482	0.00193805	0.066219	0.12807	3	3	3	3	3	3	3	3	14.4031	14.8039	14.5678	14.8331	15.1472	15.2765	18.7644	18.3827	19.0857	16.8931	16.2067	16.7706	18.1676	17.6829	19.3348	17.2231	17.3092	16.6114	17.0318	16.5041	16.8745	17.2321	16.9557
Acss1	Q99NB1	Q99NB1	Acetyl-coenzyme A synthetase 2-like, mitochondrial	0	0	0	0.939857	0.724004	0.934859	0.983479	-0.0894867	-0.46593	-0.09718	-0.0240333	0.0824491	0.00899624	0.359096	0.538849	3	3	3	3	3	3	3	3	18.9834	18.9735	18.974	18.9617	18.8693	18.8314	19.714	19.6726	19.9339	19.4175	19.2415	19.2637	19.7427	19.7211	19.9773	19.6598	19.8068	19.6829	19.3044	19.3736	19.3243	19.2515	19.3415
Acss2	Q9QXG4	Q9QXG4	Acetyl-coenzyme A synthetase, cytoplasmic	0	0	1	1.23507	0.484631	0.766623	1.782	0.30459	-1.04504	-0.38341	0.833497	0.534597	0.00597145	0.305487	0.0317198	3	3	3	3	3	3	3	3	13.7823	13.8174	12.9744	13.1307	14.074	14.2831	15.7613	15.704	16.0409	15.0428	14.8514	14.4768	15.4363	14.944	16.0103	15.1896	15.1869	14.8639	14.0952	13.9933	14.4566	15.4381	14.8765
Acta1	P68134	P68134	Actin, alpha skeletal muscle	0	0	0	NaN	NaN	NaN	NaN	NaN	NaN	NaN	NaN	NaN	NaN	NaN	NaN	0	2	0	1	0	0	2	0	NaN	NaN	NaN	17.8632	18.5955	NaN	NaN	NaN	NaN	NaN	NaN	18.9815	NaN	NaN	NaN	NaN	NaN	NaN	NaN	19.9382	19.8314	NaN	NaN
Acta2	P62737	P62737	Actin, aortic smooth muscle	0	0	0	0.977318	3.77825	0.483732	0.502179	-0.0331	1.91772	-1.04772	-0.993727	0.894601	0.382521	0.447073	0.16755	3	3	3	3	3	3	3	3	17.2981	17.9374	17.9819	17.5481	17.7823	17.7877	16.6535	19.4462	20.3919	18.7681	23.9215	19.5552	20.0836	19.5541	20.5559	18.9439	16.9587	21.1479	18.3638	20.106	18.4268	18.0185	17.6896
Actb	P60710	P60710	Actin, cytoplasmic 1	0	0	0	0.900695	1.09963	0.984668	1.00477	-0.15089	0.137013	-0.02229	0.00687	0.0408393	0.00174548	0.95979	0.982556	3	3	3	3	3	3	3	3	26.5608	26.461	26.5608	26.4471	26.3669	26.3158	26.4971	26.4406	26.4802	26.595	26.6131	26.6209	26.583	26.7079	26.3982	25.7457	27.0783	26.7982	26.4393	26.2202	25.682	25.7448	26.3704
Actbl2	Q8BFZ3	Q8BFZ3	Beta-actin-like protein 2	0	0	0	1.06849	1.13581	0.613869	0.32992	0.0955767	0.183727	-0.703997	-1.59981	0.748382	0.540077	0.363708	0.0219654	3	3	3	3	3	3	3	3	16.9699	17.2277	17.5009	17.0701	17.7914	17.1238	19.464	19.2277	19.4348	19.3393	19.2529	20.0855	19.3078	19.7113	19.4442	17.5876	18.8317	19.932	19.0096	19.3344	18.838	17.2298	16.8865
Actc1	P68033	P68033	Actin, alpha cardiac muscle 1	0	0	0	0.904574	1.05041	1.05357	0.875885	-0.14469	0.0709533	0.07529	-0.191187	0.230168	0.566316	0.151599	0.00365272	3	3	3	3	3	3	3	3	27.2437	27.5489	27.5363	27.3437	27.2813	27.2698	27.7862	28.1539	28.0161	28.0802	28.1063	27.9826	28.0157	28.1178	27.9985	28.119	28.0837	28.1551	27.7354	27.709	27.6604	27.5327	27.5328
Actg1	P63260	P63260	Actin, cytoplasmic 2	0	0	0	0.904214	1.06067	1.03408	0.708854	-0.145263	0.08498	0.0483433	-0.49644	0.0113341	0.489004	0.67699	0.00932363	3	3	3	3	3	3	3	3	23.5966	23.6512	23.5828	23.5145	23.4327	23.4475	23.6586	23.3421	23.6704	23.6688	23.6753	23.582	23.7501	23.5141	23.7279	23.6944	23.5887	23.8542	22.9884	23.0468	22.9146	22.6751	22.4432
Actl6a	Q9Z2N8	Q9Z2N8	Actin-like protein 6A	0	0	0	1.10286	1.24088	1.01979	0.871011	0.141243	0.31136	0.0282767	-0.199237	0.528631	0.0756606	0.882887	0.097102	3	3	3	3	3	3	3	3	17.3982	17.3639	16.8318	17.3873	17.4682	17.1621	17.7758	17.8537	17.4364	17.9962	17.958	18.0458	17.9836	18.0239	17.4863	17.7813	17.9547	17.8427	17.6944	17.8524	17.655	17.6739	17.4765
Actn1	Q7TPR4	Q7TPR4	Alpha-actinin-1	0	-1	0	0.801181	0.733623	0.53607	0.270063	-0.3198	-0.44689	-0.899507	-1.88863	0.0909577	0.000629484	0.000690431	0.000522449	3	3	3	3	3	3	3	3	18.8803	18.8543	18.9775	18.3253	18.6246	18.8029	19.4346	19.4923	19.524	19.0297	19.1056	18.9751	20.0437	20.0772	20.0299	18.9793	19.1703	19.3026	19.3215	19.5657	18.946	17.3089	17.4015
Actn4	P57780	P57780	Alpha-actinin-4	0	0	-1	0.918384	0.992721	0.736236	0.653932	-0.12283	-0.01054	-0.44176	-0.612787	0.162865	0.930099	0.0431839	0.0437565	3	3	3	3	3	3	3	3	20.8506	20.7669	20.8889	20.6224	20.6834	20.832	20.5433	20.9136	20.8192	20.7197	20.7869	20.7379	21.5135	21.3021	21.1781	20.6907	21.0898	20.8879	20.5804	20.7389	20.8861	20.4042	19.7573
Actr10	Q9QZB7	Q9QZB7	Actin-related protein 10	0	0	0	0.867426	0.890907	0.808199	1.15105	-0.205187	-0.166653	-0.307217	0.202953	0.0136191	0.30558	0.281895	0.259641	3	3	3	3	3	3	3	3	16.7686	16.8507	16.9231	16.6815	16.6263	16.619	18.4116	18.4626	18.51	18.2456	18.0822	18.5565	18.8733	18.5522	19.3479	18.4429	18.7229	18.6858	17.9984	17.8786	18.3548	18.1739	18.2896
Actr1a	P61164	P61164	Alpha-centractin	0	0	0	0.897174	1.02636	1.11427	1.18819	-0.15654	0.03754	0.156103	0.248767	0.255909	0.564672	0.19409	0.000442802	3	3	3	3	3	3	3	3	19.8856	19.9268	19.9938	19.552	19.8745	19.9101	20.7755	20.6483	20.838	20.8224	20.8023	20.7497	20.7669	20.7568	21.0192	20.9049	21.0276	21.0788	20.4528	20.4471	20.4542	20.7211	20.6536
Actr1b	Q8R5C5	Q8R5C5	Beta-centractin	0	0	0	0.953076	1.00325	1.2108	1.40299	-0.0693367	0.00468333	0.275963	0.488503	0.445324	0.976477	0.0865576	0.00137399	3	3	3	3	3	3	3	3	17.965	18.1085	17.974	18.0753	17.8466	17.9176	19.2061	19.2309	19.5976	19.206	19.3635	19.4793	19.1601	19.0781	19.4458	19.5006	19.5917	19.4196	18.6634	18.8157	18.8566	19.3043	19.2494
Actr2	P61161	P61161	Actin-related protein 2	0	0	0	0.906478	1.12931	1.11281	1.3213	-0.141657	0.175447	0.15421	0.40196	0.0167437	0.00405905	0.0649975	0.000679166	3	3	3	3	3	3	3	3	21.8377	21.8653	21.9154	21.7813	21.6858	21.7262	22.5925	22.5924	22.6398	22.7402	22.8269	22.7839	22.7699	22.8203	22.7041	23.0082	22.9171	22.8317	22.3465	22.2789	22.2109	22.6506	22.7041
Actr3	Q99JY9	Q99JY9	Actin-related protein 3	0	0	0	0.927968	1.06519	1.08226	1.1153	-0.107853	0.0911167	0.114043	0.157437	0.0975266	0.0217397	0.11449	0.0248592	3	3	3	3	3	3	3	3	22.1777	22.0879	22.1426	22.1094	22.0107	21.9646	22.7397	22.7417	22.7385	22.8224	22.8779	22.7929	22.8831	22.9885	22.8724	23.0946	22.9482	23.0433	22.52	22.3865	22.4597	22.6528	22.5728
Actr3b	Q641P0	Q641P0	Actin-related protein 3B	0	1	0	0.673604	1.38799	7.75502	18.6766	-0.570027	0.472993	2.95513	4.22316	0.828284	0.23313	0.0208766	8.77303e-06	3	3	3	3	3	3	3	3	15.1849	17.8972	11.5237	12.8681	12.4794	17.5482	16.435	16.148	17.1567	17.2873	16.7642	17.1071	15.4682	14.325	16.9683	18.7795	18.7651	18.0823	14.6791	14.6833	15.035	18.8919	19.1899
Actr5	Q80US4	Q80US4	Actin-related protein 5	0	0	0	NaN	1.62065	1.30495	0.781526	NaN	0.696573	0.383998	-0.355635	NaN	NaN	NaN	NaN	0	0	3	2	2	3	2	2	NaN	NaN	NaN	NaN	NaN	NaN	14.4479	14.7839	13.5693	NaN	14.8192	15.108	15.1112	NaN	14.5266	14.9284	15.273	15.4073	14.174	NaN	13.753	13.5031	13.7127
Actr8	Q8R2S9	Q8R2S9	Actin-related protein 8	0	0	0	0.995429	1.31378	1.07414	1.10799	-0.00661	0.39372	0.103183	0.14795	0.95632	0.0711406	0.778339	0.785715	3	3	3	3	3	3	3	3	17.1909	16.9442	16.9363	16.8782	17.1428	17.0306	17.198	17.5431	17.2046	17.682	17.5261	17.9187	18.6374	17.8318	17.4893	18.0331	18.1675	18.0674	18.2832	17.2597	17.0181	18.2621	17.1237
Acy1	Q99JW2	Q99JW2	Aminoacylase-1	0	0	0	0.931331	0.87352	0.594667	0.499688	-0.102633	-0.195087	-0.749847	-1.0009	0.567323	0.0192	0.00914543	0.000817723	3	3	3	3	3	3	3	3	18.4313	18.1234	18.3619	18.4596	17.9969	18.1522	18.9072	19.0012	18.8853	18.8045	18.7271	18.6768	18.9846	19.1143	18.9343	18.1016	18.1222	18.5598	18.2226	18.5268	18.5493	17.4853	17.3725
Acyp1	P56376	P56376	Acylphosphatase-1	0	0	0	0.954046	0.94528	0.879818	0.953466	-0.06787	-0.0811867	-0.184723	-0.0687467	0.714335	0.543413	0.197572	0.502122	3	3	3	3	3	3	3	3	17.5405	17.2913	17.7349	17.6671	17.4258	17.2702	17.8686	17.4835	17.6126	17.6558	17.571	17.4944	17.8121	17.5231	17.8369	17.5211	17.6592	17.4376	17.456	17.6681	17.6175	17.647	17.4565
Acyp2	P56375	P56375	Acylphosphatase-2	0	0	0	1.91311	0.22535	0.564366	0.93173	0.935922	-2.14976	-0.825297	-0.102017	NaN	0.00376191	0.174578	0.487412	2	3	3	3	3	3	3	3	NaN	11.7843	13.266	13.7814	13.4484	13.1535	17.4292	17.0619	16.892	15.607	14.7432	14.5836	16.2508	15.5775	16.9591	16.0148	14.9924	15.3043	15.7358	15.6293	15.7286	15.3659	15.6096
Ada	P03958	P03958	Adenosine deaminase	0	-1	0	0.903966	1.16252	0.533703	0.267243	-0.14566	0.217257	-0.90589	-1.90378	0.0182672	0.193313	0.018035	0.0011183	3	3	3	3	3	3	3	3	16.868	16.826	16.8286	16.7609	16.6847	16.64	15.8783	16.2085	15.8311	16.1823	16.319	16.0684	16.2334	16.4364	15.8378	15.083	15.1354	15.5716	16.2183	15.8548	16.0171	14.5274	13.966
Adal	Q80SY6	Q80SY6	Adenosine deaminase-like protein	0	0	0	1.01044	0.907974	0.904542	1.24345	0.01499	-0.139277	-0.14474	0.31435	0.874639	0.580073	0.591995	0.254423	3	3	3	3	3	3	3	3	13.9882	13.9084	14.1883	14.1072	14.0095	14.0132	15.4255	15.0099	15.4687	15.3639	15.3186	14.8038	15.4625	14.7736	15.0053	15.2181	14.8503	14.7389	15.1421	14.9425	14.8599	15.7375	15.0938
Adam10	O35598	O35598	Disintegrin and metalloproteinase domain-containing protein 10	0	0	0	0.908971	0.986946	0.849605	1.20047	-0.137693	-0.0189567	-0.235137	0.263597	0.140495	0.867909	0.118578	0.214211	3	3	3	3	3	3	3	3	18.1607	18.231	18.186	18.1927	17.9488	18.0231	18.8587	18.9973	19.193	18.9482	18.9566	19.0873	18.8664	19.0603	19.2546	18.8998	18.8082	18.7678	18.6564	18.1912	18.6769	18.931	18.6556
Adam11	Q9R1V4	Q9R1V4	Disintegrin and metalloproteinase domain-containing protein 11	0	0	0	NaN	0.514119	0.468963	NaN	NaN	-0.959827	-1.09246	NaN	NaN	NaN	NaN	NaN	0	0	3	2	2	2	0	2	NaN	NaN	NaN	NaN	NaN	NaN	14.8865	13.4117	15.191	14.1236	12.9496	NaN	14.8483	NaN	16.0526	14.1147	14.6014	NaN	NaN	NaN	NaN	15.2748	11.3404
Adam15	O88839	O88839	Disintegrin and metalloproteinase domain-containing protein 15	0	0	-1	0.906633	1.063	0.782837	0.654758	-0.14141	0.0881467	-0.353217	-0.610967	0.169316	0.525305	0.0171926	0.0272022	3	3	3	3	3	3	3	3	16.6411	16.4258	16.5387	16.4332	16.4671	16.2812	17.7354	18.1405	17.8438	17.9262	18.0012	18.0566	18.0018	18.1786	18.139	17.6665	17.6963	17.8969	17.6603	17.3826	17.4372	16.5668	17.0591
Adam17	Q9Z0F8	Q9Z0F8	Disintegrin and metalloproteinase domain-containing protein 17	0	0	0	1.01995	1.52625	1.02965	1.2912	0.0284933	0.60999	0.04216	0.368717	0.80341	0.259624	0.697791	0.416234	3	3	3	3	3	3	3	3	15.5418	15.4251	15.5212	15.693	15.5365	15.344	16.0955	16.3672	16.2494	16.2492	16.5455	17.7474	16.6828	16.7236	16.4562	16.6993	16.5508	16.739	16.3658	16.4564	16.2471	17.5261	16.2551
Adam22	Q9R1V6	Q9R1V6	Disintegrin and metalloproteinase domain-containing protein 22	0	0	1	6.2103	0.759762	1.17983	2.1325	2.63466	-0.39638	0.238573	1.09255	NaN	0.136279	0.714139	0.0216215	3	1	3	3	3	3	3	3	10.853	10.3291	14.1987	NaN	14.4283	NaN	15.4512	15.2108	15.759	15.2059	14.7934	15.2325	15.4625	14.5924	16.4066	15.9924	16.069	15.1159	14.2291	14.0453	14.9695	15.6428	15.3189
Adam23	Q9R1V7	Q9R1V7	Disintegrin and metalloproteinase domain-containing protein 23	0	0	0	NaN	0.291246	0.3537	1.35985	NaN	-1.77969	-1.4994	0.443447	NaN	0.298639	0.476523	0.833254	1	0	3	3	3	3	3	3	15.7685	NaN	NaN	NaN	NaN	NaN	18.6459	16.3137	18.8233	15.042	14.7536	18.6484	21.3385	16.1779	20.8643	19.8571	17.3612	16.6641	15.6273	15.444	19.8814	16.1166	16.0595
Adam9	Q61072	Q61072	Disintegrin and metalloproteinase domain-containing protein 9	0	0	0	0.765754	1.30832	1.21337	1.47707	-0.385047	0.38772	0.27902	0.56274	0.00885131	0.0307645	0.0169394	0.0303014	3	3	3	3	3	3	3	3	15.0887	15.1118	14.9087	14.6478	14.5683	14.7379	16.2205	16.6187	16.433	16.8683	16.7918	16.7753	16.7896	16.6971	16.5997	16.8937	17.0483	16.9814	15.9925	16.0263	15.764	16.7647	16.2478
Adap2	Q8R2V5	Q8R2V5	Arf-GAP with dual PH domain-containing protein 2	0	-1	0	0.982693	0.80215	0.490052	0.254582	-0.0251867	-0.318057	-1.02899	-1.9738	0.507372	0.0195583	0.0097892	8.74154e-05	3	3	3	3	3	3	3	3	18.4938	18.393	18.4348	18.4462	18.418	18.3819	19.6196	19.4767	19.4351	19.1266	19.3186	19.132	19.5989	19.8212	19.3989	18.4714	18.3222	18.9385	19.2486	19.3969	19.0416	17.1369	17.3678
Adar	Q99MU3	Q99MU3	Double-stranded RNA-specific adenosine deaminase	0	0	0	0.989234	0.853875	1.51429	1.1346	-0.0156167	-0.227903	0.59864	0.182187	0.835831	0.458191	0.0234654	0.132139	3	3	3	3	3	3	3	3	18.2039	18.017	18.1261	18.1534	18.1367	18.01	20.3645	20.188	21.0641	20.2431	20.2286	20.4611	19.9008	19.9358	19.4946	20.4179	20.2027	20.5065	20.4687	20.62	20.4734	20.7983	20.7723
Adat2	Q6P6J0	Q6P6J0	tRNA-specific adenosine deaminase 2	0	0	0	0.913772	0.779013	0.81056	0.877072	-0.130093	-0.36028	-0.30301	-0.189233	0.0204079	0.379275	0.484256	0.682126	3	3	3	3	3	3	3	3	16.6784	16.7495	16.7167	16.6399	16.5678	16.5466	18.3611	18.4682	18.2484	18.288	18.4241	17.2847	18.41	18.6196	18.4606	18.456	18.6959	17.4293	16.7683	18.0162	17.9228	17.673	17.1607
Adck1	Q9D0L4	Q9D0L4	Uncharacterized aarF domain-containing protein kinase 1	0	0	0	0.997464	0.820275	0.754242	0.74373	-0.00366333	-0.28582	-0.4069	-0.42715	0.97298	0.00153742	0.0295824	0.00176519	3	3	3	3	3	3	3	3	16.5859	16.6091	16.5926	16.7823	16.4359	16.5584	17.1408	17.1098	17.184	16.9094	16.863	16.8047	17.5458	17.501	17.7422	17.3465	17.2124	17.0094	16.7876	16.6996	16.8738	16.4093	16.3119
Adcy2	Q80TL1	Q80TL1	Adenylate cyclase type 2	0	0	0	0.859825	4.23052	1.81953	2.00417	-0.217885	2.08083	0.863567	1.003	NaN	0.293629	0.29377	0.634028	2	2	3	3	3	3	3	3	15.7271	NaN	15.6628	15.6694	NaN	15.2847	12.356	12.0164	13.0856	11.1808	16.1813	16.3385	15.2229	15.2927	13.2703	15.697	14.9227	15.7569	14.2674	14.3874	9.23066	11.9032	15.2019
Adcy7	P51829	P51829	Adenylate cyclase type 7	0	0	0	0.998017	1.07313	1.07423	0.883164	-0.00286333	0.101823	0.103307	-0.179247	0.983781	0.218808	0.0250299	0.269808	3	3	3	3	3	3	3	3	15.0398	14.6468	15.037	14.8889	14.8776	14.9485	15.5822	15.5011	15.3994	15.5082	15.6615	15.6185	15.909	15.9488	15.8772	16.0082	15.9823	16.0545	15.5082	15.5465	15.7533	15.6272	15.22
Adcy9	P51830	P51830	Adenylate cyclase type 9	0	0	0	2.90282	0.780593	0.845393	1.55236	1.53745	-0.357357	-0.242307	0.63446	NaN	0.156589	0.327851	0.233721	2	2	3	3	3	3	3	3	NaN	12.0812	12.6273	12.736	NaN	15.0474	15.1894	15.1576	15.767	15.021	14.9176	15.1033	15.2884	15.636	15.8687	15.4714	15.5134	15.0814	14.7273	13.5503	14.8726	14.6865	15.1014
Add1	Q9QYC0	Q9QYC0	Alpha-adducin	0	0	0	1.22496	0.615257	0.6838	0.846188	0.292737	-0.70074	-0.548353	-0.24095	0.0393549	0.0217062	0.0451221	0.189818	3	3	3	3	3	3	3	3	17.1474	17.0978	16.8483	17.3706	17.2697	17.3314	18.8888	18.8403	19.0899	18.5908	18.0608	18.0652	18.9019	18.6648	19.3053	18.4625	18.426	18.3384	18.2413	17.9785	18.1933	18.1363	17.8629
Add2	Q9QYB8	Q9QYB8	Beta-adducin	0	0	1	2.80426	0.340277	0.837393	2.10779	1.48762	-1.55522	-0.256023	1.07573	0.0276078	0.00907876	0.760541	0.0226739	3	3	3	3	3	3	3	3	11.5513	12.302	11.8168	12.6523	13.5421	13.9385	17.6385	17.2853	18.2313	16.4986	15.8909	16.1	16.7002	15.4644	17.9487	16.7467	16.7861	15.8125	15.5329	15.658	16.4823	16.9629	16.9343
Add3	Q9QYB5	Q9QYB5	Gamma-adducin	0	0	0	1.07413	0.609195	0.733645	1.09663	0.10317	-0.715023	-0.446847	0.133073	0.0415327	0.00729019	0.0766559	0.170056	3	3	3	3	3	3	3	3	16.9621	16.9703	17.0621	17.1158	17.1141	17.0741	18.994	18.745	19.1954	18.3359	18.1523	18.301	18.8513	18.731	19.3228	18.5614	18.5879	18.4153	18.0851	17.8957	18.1459	18.1723	18.1322
Adgre1	Q61549	Q61549	Adhesion G protein-coupled receptor E1	0	-1	0	0.948496	0.821296	0.573697	0.257797	-0.0762867	-0.284027	-0.80164	-1.95569	0.319228	0.0511917	0.00755566	7.85301e-05	3	3	3	3	3	3	3	3	18.2111	18.0432	18.1246	18.1412	18.0198	17.9891	18.5874	18.7791	18.5963	18.3019	18.5337	18.2751	18.8375	18.8895	18.5681	17.775	17.9123	18.2029	18.3356	18.6393	18.5034	16.6901	16.4243
Adgrg1	Q8K209	Q8K209	Adhesion G-protein coupled receptor G1	0	0	0	0.563293	0.892912	0.813911	0.894887	-0.828043	-0.16341	-0.297057	-0.160223	0.32899	0.703451	0.188975	0.711131	3	3	3	3	3	3	3	3	16.7796	15.5117	16.7249	16.7498	14.9395	14.8427	16.5884	15.8617	17.2151	16.4752	16.2282	16.4715	16.8336	17.2583	16.695	16.5923	16.5154	16.788	15.5858	16.6568	16.846	16.3376	16.0288
Adgrl1	Q80TR1	Q80TR1	Adhesion G protein-coupled receptor L1	0	0	0	NaN	7.98545	18.568	NaN	NaN	2.99737	4.21475	NaN	NaN	0.183182	NaN	NaN	0	0	3	3	2	3	0	3	NaN	NaN	NaN	NaN	NaN	NaN	11.5626	10.026	16.209	15.8445	15.6099	15.3354	11.3007	NaN	12.9595	16.3049	16.4753	16.2544	NaN	NaN	NaN	14.9311	15.3973
Adgrl3	Q80TS3	Q80TS3	Adhesion G protein-coupled receptor L3	0	0	0	NaN	NaN	3.8139	3.84125	NaN	NaN	1.93127	1.94158	NaN	NaN	0.0735436	NaN	0	0	1	0	3	3	1	2	NaN	NaN	NaN	NaN	NaN	NaN	NaN	9.71752	NaN	NaN	NaN	NaN	11.9549	9.81641	11.7931	13.4986	13.5628	12.2968	11.0273	NaN	NaN	12.871	NaN
Adh5	P28474	P28474	Alcohol dehydrogenase class-3	0	0	0	0.927659	1.0647	0.995528	0.933039	-0.108333	0.0904533	-0.00646667	-0.09999	0.14524	0.288481	0.932543	0.158333	3	3	3	3	3	3	3	3	20.8763	20.9395	21.0518	20.8972	20.7903	20.8551	21.8349	21.8647	21.737	21.7793	21.941	21.9877	21.9345	21.9729	21.7587	21.9155	21.9052	21.8259	21.4221	21.597	21.4398	21.3708	21.3706
Adhfe1	Q8R0N6	Q8R0N6	Hydroxyacid-oxoacid transhydrogenase, mitochondrial	0	0	0	1.42065	0.543585	0.40285	1.1207	0.506547	-0.879423	-1.31169	0.164397	0.02086	NaN	0.0377764	NaN	3	3	3	2	3	3	2	3	12.569	12.7186	12.6516	13.4039	13.0859	12.969	15.3371	15.2237	15.757	13.701	NaN	15.4187	15.2669	14.2282	15.5381	13.8035	13.9046	13.39	12.9208	NaN	13.4382	13.5302	12.7861
Adi1	Q99JT9	Q99JT9	1,2-dihydroxy-3-keto-5-methylthiopentene dioxygenase	0	0	0	0.90912	1.22496	1.8524	1.87683	-0.137457	0.292733	0.889393	0.9083	0.427183	0.0147309	0.0350212	0.0231314	3	3	3	3	3	3	3	3	16.8411	16.7896	17.2777	16.8022	16.8582	16.8357	18.1558	18.0239	18.0088	18.446	18.2599	18.3608	18.1144	18.1854	17.7493	19.1139	19.1944	18.409	17.4858	17.5937	18.0454	18.9159	18.2731
Adk	P55264	P55264	Adenosine kinase	0	0	1	0.993659	0.717791	0.965936	1.49253	-0.00917667	-0.478363	-0.05	0.57776	0.928262	0.0267723	0.818691	0.00275728	3	3	3	3	3	3	3	3	17.3904	17.5634	17.5542	17.6453	17.4449	17.3902	18.9585	18.7182	19.1826	18.5389	18.4833	18.402	18.4329	18.3062	18.9002	18.6654	18.4888	18.3351	17.7899	17.6026	17.5926	18.12	18.2911
Adnp	Q9Z103	Q9Z103	Activity-dependent neuroprotector homeobox protein	0	0	0	1.73581	1.14215	1.13153	1.61486	0.79561	0.191753	0.178273	0.69141	0.47829	0.141634	0.345627	0.320683	3	3	3	3	3	3	3	3	14.3418	14.3396	11.3218	13.9743	14.4421	13.9736	16.4964	16.6248	16.3357	16.8005	16.642	16.5897	16.556	16.75	16.5946	16.9417	16.9925	16.5012	15.929	14.1619	15.8561	16.0764	16.3112
Ado	Q6PDY2	Q6PDY2	2-aminoethanethiol dioxygenase	0	0	0	0.991735	0.975295	1.02579	1.10591	-0.0119733	-0.03609	0.03674	0.145233	0.909148	0.967674	0.83007	0.835914	3	3	3	3	3	3	3	3	17.2901	17.4341	17.5625	17.533	17.3377	17.38	20.4357	18.8649	19.1126	18.7328	20.7954	18.7768	18.766	18.6709	19.0658	19.0249	18.9241	18.6639	18.0261	17.7841	19.4017	17.8389	18.5095
Adpgk	Q8VDL4	Q8VDL4	ADP-dependent glucokinase	0	0	0	0.953072	1.02198	1.06126	1.12848	-0.0693433	0.0313733	0.08578	0.174387	0.112453	0.522303	0.0838834	0.0688013	3	3	3	3	3	3	3	3	17.4247	17.3935	17.4802	17.3225	17.3662	17.4018	18.2563	18.301	18.316	18.331	18.2475	18.389	18.3735	18.3359	18.2783	18.4651	18.3956	18.3844	18.144	18.0741	18.1431	18.1699	18.3975
Adprh	P54923	P54923	[Protein ADP-ribosylarginine] hydrolase	0	0	0	0.96399	1.23781	1.20994	1.08877	-0.05291	0.307787	0.27493	0.122697	0.613734	0.0207205	0.0305775	0.0244505	3	3	3	3	3	3	3	3	18.0711	18.1172	18.2627	18.2518	18.0363	18.0043	18.7361	19.0017	18.9332	19.1677	19.2448	19.1818	19.2134	19.3398	19.0648	19.513	19.502	19.4277	18.6239	18.634	18.562	18.7613	18.7501
Adprhl2	Q8CG72	Q8CG72	Poly(ADP-ribose) glycohydrolase ARH3	0	0	0	0.998054	1.1408	1.11815	1.0359	-0.00281	0.190043	0.161117	0.05088	0.973073	0.0663397	0.337358	0.676176	3	3	3	3	3	3	3	3	18.05	18.0054	18.2488	18.1195	18.0529	18.1233	18.2403	18.3949	18.2137	18.5591	18.384	18.4758	18.6923	18.6448	18.2472	18.6933	18.7641	18.6103	18.3683	18.2975	18.0213	18.3595	18.2447
Adprm	Q99KS6	Q99KS6	Manganese-dependent ADP-ribose/CDP-alcohol diphosphatase	0	0	0	0.965983	0.947219	0.837974	0.69488	-0.04993	-0.07823	-0.255023	-0.525163	0.77954	0.697059	0.32593	0.257072	3	3	3	3	3	3	3	3	15.1432	15.0787	15.2198	15.4138	14.9967	14.8814	15.4135	15.5049	15.1692	15.599	15.1479	15.106	16.4993	15.8144	15.9391	15.6827	15.8204	15.9846	14.8293	15.6779	14.9708	14.0816	14.7141
Adrb2	P18762	P18762	Beta-2 adrenergic receptor	0	0	0	0.785446	0.721051	0.559867	0.1694	-0.348417	-0.471827	-0.836843	-2.5615	0.106367	0.230946	0.00328048	NaN	3	3	3	3	3	3	3	1	15.9605	15.9425	15.9099	15.2704	15.6619	15.8353	15.7211	15.6624	15.6942	14.5824	15.3703	15.7095	15.6434	15.8278	15.4108	14.8202	14.6813	14.87	15.4183	15.5812	15.2711	12.862	NaN
Adrbk2	Q3UYH7	Q3UYH7	Beta-adrenergic receptor kinase 2	0	0	0	0.913779	1.00106	0.927745	0.844171	-0.130083	0.00153333	-0.1082	-0.244393	0.17431	0.98331	0.155996	0.019353	3	3	3	3	3	3	3	3	18.2809	18.2456	18.3622	18.301	18.0608	18.1367	19.1034	19.133	19.216	19.0538	19.1421	19.2611	18.9994	19.1687	19.1058	19.0347	19.0044	18.9102	18.7284	18.7679	18.7573	18.4834	18.4104
Adrm1	Q9JKV1	Q9JKV1	Proteasomal ubiquitin receptor ADRM1	0	0	0	0.917937	0.982512	1.13682	1.21852	-0.123533	-0.0254533	0.18501	0.285133	0.304525	0.938256	0.0445076	0.0248036	3	3	3	3	3	3	3	3	19.1633	19.2764	19.4602	19.2947	19.128	19.1065	19.53	19.7761	19.8843	19.1277	20.0506	19.9357	19.8289	19.8161	19.7767	20.1044	19.9821	19.8902	19.5754	19.5623	19.5079	19.9649	19.6928
Adsl	P54822	P54822	Adenylosuccinate lyase	0	0	0	0.984532	0.980595	0.998686	1.06055	-0.02249	-0.02827	-0.00189667	0.0848133	0.750877	0.677688	0.97716	0.576845	3	3	3	3	3	3	3	3	18.0993	17.9721	17.9928	18.1034	17.9629	17.9304	19.0198	19.0466	19.0748	19.1053	19.0504	18.9007	19.0153	19.0448	19.1541	18.9907	19.0684	19.1493	18.79	18.5125	18.3333	18.5569	18.6255
Adss	P46664	P46664	Adenylosuccinate synthetase isozyme 2	0	1	0	0.867533	1.20968	1.43731	1.72522	-0.20501	0.27463	0.52337	0.78678	0.25147	0.0498494	0.000936119	0.00140601	3	3	3	3	3	3	3	3	18.6684	18.8072	18.7811	18.2582	18.6448	18.7386	19.2933	19.0836	19.2946	19.5879	19.5462	19.3613	19.2685	19.4178	19.3048	19.8328	19.9299	19.7985	18.8316	19.0276	18.8101	19.7186	19.7749
Adssl1	P28650	P28650	Adenylosuccinate synthetase isozyme 1	1	0	0	0.762233	2.19681	5.48823	10.7378	-0.391697	1.13541	2.45634	3.42463	0.0536937	0.000597	0.000697799	1.25558e-05	3	3	3	3	3	3	3	3	17.51	17.7813	17.7342	17.2146	17.1224	17.5134	18.7676	18.682	18.8934	20.0721	19.7366	19.9406	18.8002	18.9774	19.128	21.6358	21.6964	20.9424	18.8892	19.1678	19.0033	22.4321	22.6282
Aes	P63002	P63002	Amino-terminal enhancer of split	0	0	0	0.189689	1.41118	1.12116	0.975896	-2.39829	0.496903	0.164997	-0.0352	0.0812192	0.109867	0.372787	0.931644	3	3	3	3	3	3	3	3	13.6359	14.4013	13.7316	13.5291	10.6675	10.3773	13.9625	14.4699	14.7731	14.8255	14.8668	15.0039	14.55	14.76	14.6352	15.0874	14.7937	14.559	15.3763	15.3117	14.5478	15.5492	14.5863
Afdn	Q9QZQ1	Q9QZQ1	Afadin	0	0	0	0.92002	0.823996	0.892646	0.963476	-0.120263	-0.27929	-0.16384	-0.05368	0.724629	0.20733	0.262299	0.588585	3	3	3	3	3	3	3	3	15.1064	14.0633	14.5168	14.3093	14.378	14.6382	15.3386	15.7347	15.8774	15.2933	15.2644	15.5552	15.7781	15.8857	16.1693	15.8382	15.6881	15.8153	15.6265	15.6519	15.7092	15.701	15.4328
Afg3l2	Q8JZQ2	Q8JZQ2	AFG3-like protein 2	0	0	0	0.985538	0.568386	0.809414	0.945018	-0.0210167	-0.815057	-0.30505	-0.0815867	0.505312	0.00539474	0.235645	0.177728	3	3	3	3	3	3	3	3	17.201	17.1745	17.2632	17.2043	17.1687	17.2028	18.9895	18.8033	19.2647	18.2972	18.0805	18.2347	18.8535	18.4858	19.21	18.667	18.5183	18.4488	18.0838	18.1699	18.1331	17.9976	18.1335
Aftph	Q80WT5	Q80WT5	Aftiphilin	0	0	0	1.06332	0.930544	0.889981	0.442699	0.0885767	-0.103853	-0.168153	-1.1756	0.198843	0.447318	0.361187	0.00459701	3	3	3	3	3	3	3	3	14.3821	14.4221	14.5476	14.5067	14.5967	14.5142	15.7655	16.0995	15.7101	15.7435	15.7946	15.7253	16.1653	16.164	15.6835	15.7905	15.824	15.8937	15.3314	15.3936	14.8673	14.262	13.8834
Ag2	Q3UPL5	Q3UPL5	Uncharacterized protein C11orf96 homolog	0	0	0	1.02907	0.992599	1.46928	2.0932	0.0413433	-0.0107167	0.55511	1.06571	0.759452	0.934022	0.242542	0.0570033	3	3	3	3	3	3	3	3	15.4474	15.1244	15.2356	15.461	15.2967	15.1737	15.0955	15.2518	15.5085	15.2883	15.2401	15.2953	15.313	15.0791	14.9009	16.0183	16.0613	14.8788	13.5435	14.7154	14.3334	15.6194	15.2664
Aga	Q64191	Q64191	N(4)-(beta-N-acetylglucosaminyl)-L-asparaginase	0	0	0	2.08951	NaN	NaN	0.907978	1.06316	NaN	NaN	-0.13927	NaN	NaN	NaN	0.614847	2	1	0	0	0	0	3	3	13.3983	NaN	14.2888	14.9067	NaN	NaN	NaN	NaN	NaN	NaN	NaN	NaN	NaN	NaN	NaN	NaN	NaN	NaN	15.9168	15.6701	15.1795	15.7202	15.33
Agap2	Q3UHD9	Q3UHD9	Arf-GAP with GTPase, ANK repeat and PH domain-containing protein 2	0	0	0	1.23714	0.64378	0.698596	6.6758	0.30701	-0.63536	-0.51747	2.73894	NaN	0.194494	0.350526	0.282216	2	2	3	3	3	3	3	3	NaN	13.1926	11.1527	NaN	12.4796	12.4798	15.2651	15.1567	15.5351	15.3276	14.7496	13.9735	15.672	15.8214	16.3108	15.8152	14.5183	15.9183	14.5373	14.1251	7.77691	14.3319	15.2478
Agap3	Q8VHH5	Q8VHH5	Arf-GAP with GTPase, ANK repeat and PH domain-containing protein 3	0	0	0	3.2264	0.665827	0.98438	1.49469	1.68992	-0.58678	-0.0227133	0.579843	NaN	0.102429	0.962597	0.0987948	2	3	3	3	3	3	3	3	11.5549	NaN	14.6634	15.4785	14.3435	14.5753	16.3626	15.5842	16.1652	15.1491	15.6063	15.5962	15.5831	14.7345	16.2975	15.6273	15.46	15.4597	14.7989	15.2097	14.9972	15.1849	16.0239
Agfg1	Q8K2K6	Q8K2K6	Arf-GAP domain and FG repeat-containing protein 1	0	0	0	0.947451	1.08651	0.901209	1.02405	-0.0778767	0.119707	-0.150067	0.0342867	0.0160599	0.716501	0.114806	0.654816	3	3	3	3	3	3	3	3	16.6184	16.6572	16.6813	16.5873	16.567	16.5689	17.1903	16.7896	16.1777	16.6751	16.8693	16.9723	17.1463	17.2789	17.3772	17.1274	17.0556	17.1691	16.7613	16.6747	16.897	16.8616	16.8148
Agfg2	Q80WC7	Q80WC7	Arf-GAP domain and FG repeat-containing protein 2	0	0	0	1.09226	0.839503	0.935863	1.4278	0.127313	-0.252393	-0.09563	0.513793	0.258333	0.0718439	0.668832	0.0016912	3	3	3	3	3	3	3	3	15.0594	15.2117	15.2566	15.2043	15.4528	15.2525	16.3561	16.1743	16.4201	16.0827	15.9296	16.1811	16.3122	16.2795	16.7863	16.2449	16.2278	16.6183	15.9311	15.8869	15.8892	16.5474	16.3273
Agk	Q9ESW4	Q9ESW4	Acylglycerol kinase, mitochondrial	0	0	0	0.938494	0.521774	0.660561	0.480016	-0.09158	-0.938503	-0.598237	-1.05885	0.159378	0.000798118	0.0180882	0.0005038	3	3	3	3	3	3	3	3	18.1119	18.2141	18.1703	18.1616	18.0362	18.0237	19.4344	19.271	19.5843	18.5388	18.5416	18.3939	19.2661	19.0371	19.5121	18.7356	18.7547	18.5303	18.3483	18.3663	18.2804	17.0755	17.3481
Agmo	Q8BS35	Q8BS35	Alkylglycerol monooxygenase	0	0	0	0.90204	1.04161	0.637403	0.842285	-0.148737	0.0588167	-0.649723	-0.24762	0.483133	0.550849	0.0054395	0.474514	3	3	3	3	3	3	3	3	15.8132	15.663	16.1222	15.985	15.6368	15.5304	15.6634	15.8926	15.6725	15.7833	15.7246	15.897	15.1666	15.2123	15.428	14.6892	14.4457	14.7228	15.3558	15.0543	14.8751	14.3305	15.2968
Ago1	Q8CJG1	Q8CJG1	Protein argonaute-1	0	0	0	1.07719	1.12675	0.958378	1.13053	0.107273	0.172173	-0.0613333	0.176997	0.311876	0.0124111	0.37265	0.16949	3	3	3	3	3	3	3	3	16.8683	16.9855	16.6694	16.9518	16.9628	16.9305	17.9162	18.0381	18.0136	18.1348	18.1829	18.1667	18.2782	18.4496	18.3516	18.2614	18.3699	18.2641	17.677	17.617	17.8557	17.7853	17.8511
Ago2	Q8CJG0	Q8CJG0	Protein argonaute-2	0	0	0	1.07519	1.30916	1.02338	1.5811	0.104587	0.38864	0.0333433	0.66093	0.363519	0.0185129	0.907791	0.227063	3	3	3	3	3	3	3	3	16.0362	16.0474	15.8074	15.9399	16.1565	16.1083	17.6237	17.3879	17.4616	17.7595	18.0132	17.8663	17.5312	17.9825	17.8726	17.6971	18.2831	17.5063	17.4115	17.3805	16.2601	17.935	17.9561
Agpat1	O35083	O35083	1-acyl-sn-glycerol-3-phosphate acyltransferase alpha	0	0	0	1.01719	0.727823	0.935764	1.15988	0.0245867	-0.45834	-0.0957833	0.213977	0.656472	0.121409	0.496669	0.0930571	3	3	3	3	3	3	3	3	16.7495	16.7922	16.6955	16.8019	16.6854	16.8237	17.3761	17.6514	18.1616	17.2864	17.1942	17.3336	17.6178	17.6718	18.011	17.6096	17.6688	17.7349	17.3299	17.1224	17.3029	17.3209	17.5433
Agpat2	Q8K3K7	Q8K3K7	1-acyl-sn-glycerol-3-phosphate acyltransferase beta	0	0	0	0.943037	0.842367	1.00918	1.45216	-0.0846133	-0.24748	0.01319	0.5382	0.532277	0.18731	0.944799	0.0392814	3	3	3	3	3	3	3	3	14.5477	14.173	14.196	14.2671	14.2175	14.1782	16.056	16.4206	16.2264	16.1336	16.0663	15.7607	16.0903	16.0732	16.0082	16.3306	15.7318	16.1489	15.3691	15.557	15.9132	16.0272	16.3002
Agpat3	Q9D517	Q9D517	1-acyl-sn-glycerol-3-phosphate acyltransferase gamma	0	0	0	0.922216	0.854248	0.875859	1.00123	-0.116823	-0.227273	-0.19123	0.00177333	0.052218	0.020393	0.071889	0.919358	3	3	3	3	3	3	3	3	18.4743	18.5581	18.4728	18.4487	18.3465	18.3595	19.8042	19.9058	19.9753	19.7066	19.5971	19.6998	19.9348	19.9733	20.0665	19.7405	19.9365	19.7239	19.1967	19.177	19.2081	19.2144	19.169
Agpat4	Q8K4X7	Q8K4X7	1-acyl-sn-glycerol-3-phosphate acyltransferase delta	0	0	0	1.36503	0.439208	0.746493	1.14641	0.448937	-1.18702	-0.4218	0.19712	0.130346	0.00459225	0.30884	0.510979	3	3	3	3	3	3	3	3	13.242	13.8034	13.4047	13.6589	13.9012	14.2368	16.3959	16.3027	16.8324	15.5262	15.0882	15.3556	16.2508	15.7319	16.8489	16.0419	15.9964	15.5279	15.1988	15.025	15.8483	15.7659	15.3976
Agpat5	Q9D1E8	Q9D1E8	1-acyl-sn-glycerol-3-phosphate acyltransferase epsilon	0	0	0	1.13751	0.70663	0.985893	0.967536	0.185883	-0.500973	-0.0204967	-0.0476133	0.480347	0.0100692	0.939483	0.86742	3	3	3	3	3	3	3	3	14.9995	15.7986	15.4529	15.5395	15.7235	15.5457	17.169	16.869	16.9652	16.6275	16.4321	16.4407	17.048	16.7828	17.4918	17.2252	17.2425	16.7934	16.0484	16.6293	15.785	15.9424	16.0996
Agps	Q8C0I1	Q8C0I1	Alkyldihydroxyacetonephosphate synthase, peroxisomal	0	0	0	0.961887	0.961912	0.941263	0.877147	-0.05606	-0.0560233	-0.08733	-0.18911	0.532082	0.52143	0.558259	0.0879053	3	3	3	3	3	3	3	3	17.072	17.0781	17.1585	17.1987	16.9468	16.995	17.9426	18.0447	18.0593	17.8178	18.0349	18.0257	17.8496	18.0618	17.7065	17.8895	17.8602	17.6062	17.1136	17.3956	17.3144	17.0757	17.0803
Agtrap	Q9WVK0	Q9WVK0	Type-1 angiotensin II receptor-associated protein	0	0	0	0.944909	0.430515	0.481272	0.511204	-0.0817533	-1.21586	-1.05508	-0.96803	0.857014	NaN	NaN	NaN	3	3	1	3	2	3	3	2	16.7009	15.5849	16.7287	15.8616	16.4281	16.4795	NaN	18.6241	NaN	17.406	17.5807	17.2378	19.3593	18.9308	NaN	18.6093	17.6028	18.0578	19.3732	19.0133	18.6218	NaN	18.049
Ahctf1	Q8CJF7	Q8CJF7	Protein ELYS	0	0	0	0.88079	0.786334	0.978649	0.970258	-0.18313	-0.346787	-0.0311367	-0.04356	0.741503	0.0265055	0.82605	0.764418	3	3	3	3	3	3	3	3	14.9688	14.9259	16.4594	15.3375	15.0372	15.4301	16.6932	16.3986	16.3827	16.1515	16.1352	16.1475	16.1441	16.1465	16.5255	16.1645	16.2962	16.262	15.6844	15.5539	15.3727	15.6929	15.3628
Ahcy	P50247	P50247	Adenosylhomocysteinase	0	0	1	0.939718	1.11608	1.29066	1.7449	-0.0897	0.15844	0.368113	0.803143	0.21276	0.00645664	0.0394083	0.000177457	3	3	3	3	3	3	3	3	19.7708	19.8625	19.8453	19.8406	19.7067	19.6622	20.538	20.6382	20.5934	20.7304	20.7542	20.7603	20.822	20.6844	20.7133	21.26	21.1809	20.8831	20.0909	19.9256	20.0034	20.7407	20.8618
Ahcyl1	Q80SW1	Q80SW1	Putative adenosylhomocysteinase 2	0	0	0	1.11257	0.698802	0.865105	1.34274	0.1539	-0.517043	-0.209053	0.425183	0.157935	0.00407632	0.34908	0.0022524	3	3	3	3	3	3	3	3	19.693	19.7639	19.7176	19.707	19.9794	19.9497	21.5853	21.6293	21.8657	21.1844	21.1637	21.1811	21.4157	21.3601	21.9528	21.3586	21.4692	21.2736	20.8396	20.8057	20.8656	21.2239	21.1853
Ahcyl2	Q68FL4	Q68FL4	Putative adenosylhomocysteinase 3	0	0	0	1.32486	0.847793	1.07752	1.44453	0.40584	-0.238217	0.107713	0.530603	0.142222	0.154975	0.394761	0.0145425	3	3	3	3	3	3	3	3	15.9066	15.4649	16.1739	16.2028	16.4155	16.1447	17.3538	17.3644	17.7343	17.1388	17.3018	17.2974	17.3082	17.2232	17.5942	17.5063	17.458	17.4845	16.7323	16.7781	17.0011	17.3189	17.2275
Ahsa1	Q8BK64	Q8BK64	Activator of 90 kDa heat shock protein ATPase homolog 1	0	0	0	0.953629	0.989602	0.964487	0.756812	-0.0685	-0.01508	-0.0521667	-0.401993	0.152829	0.835325	0.275964	0.0441824	3	3	3	3	3	3	3	3	19.671	19.6858	19.7824	19.6719	19.6133	19.6485	20.2714	20.2718	20.2924	20.3379	20.324	20.1284	20.4154	20.467	20.3952	20.3594	20.3207	20.441	19.8322	19.6608	19.6514	19.4084	19.4662
Ahsg	P29699	P29699	Alpha-2-HS-glycoprotein	0	0	0	NaN	0.471151	0.708975	0.447144	NaN	-1.08574	-0.496193	-1.16119	NaN	0.0104204	0.287589	NaN	0	3	3	3	3	3	2	2	NaN	NaN	NaN	10.274	10.2577	10.2603	13.1181	12.8435	12.7716	11.6435	11.5806	12.2518	11.8904	13.2075	12.7575	12.27	11.8834	12.2135	11.89	NaN	12.9274	10.9124	NaN
Aida	Q8C4Q6	Q8C4Q6	Axin interactor, dorsalization-associated protein	0	0	0	1.0271	1.04201	1.21786	1.01207	0.0385733	0.0593633	0.284347	0.0173033	0.606205	0.634832	0.0116821	0.925558	3	3	3	3	3	3	3	3	15.5037	15.3631	15.5261	15.5605	15.4108	15.5373	16.4825	16.8625	16.7469	16.7566	16.7098	16.8036	16.6247	16.4628	16.4637	16.7306	16.8454	16.8283	16.3067	16.2825	16.1243	15.9446	16.5035
Aif1	O70200	O70200	Allograft inflammatory factor 1	0	0	-1	0.892572	1.11585	0.902053	0.542951	-0.16396	0.158147	-0.148717	-0.881107	0.348859	0.0593347	0.265796	0.00848483	3	3	3	3	3	3	3	3	21.6408	21.6319	22.027	21.7682	21.5022	21.5374	22.964	23.0001	23.0168	23.2172	23.2031	23.035	22.4664	22.5813	22.2411	22.231	22.2168	22.3948	21.0034	20.9556	20.7014	19.9384	20.3043
Aifm1	Q9Z0X1	Q9Z0X1	Apoptosis-inducing factor 1, mitochondrial	0	0	0	1.02289	0.670939	0.887513	0.970332	0.03265	-0.575747	-0.17216	-0.04345	0.577872	0.00539349	0.225644	0.42993	3	3	3	3	3	3	3	3	18.0547	18.03	17.9467	17.9624	18.109	18.058	19.573	19.5466	19.8659	19.1013	19.0396	19.1174	19.4121	19.2949	19.6933	19.257	19.2927	19.334	18.85	18.8971	18.762	18.7336	18.8188
Aim2	Q91VJ1	Q91VJ1	Interferon-inducible protein AIM2	0	0	0	0.872613	1.15187	0.82963	0.615292	-0.196587	0.203973	-0.26946	-0.700657	0.124278	0.135427	0.194842	0.0992621	3	3	3	3	3	3	3	3	15.4524	15.165	15.1646	15.0371	15.1292	15.026	16.4	16.3554	16.0692	16.4822	16.5371	16.4171	16.5768	16.7105	16.1744	16.2118	16.1105	16.3309	15.904	16.0723	16.053	14.6797	15.4954
Aimp1	P31230	P31230	Aminoacyl tRNA synthase complex-interacting multifunctional protein 1	0	0	0	0.987863	1.18833	1.26227	1.50201	-0.0176167	0.24893	0.33602	0.586897	0.858938	0.0601635	0.0363505	0.00327798	3	3	3	3	3	3	3	3	17.2503	17.1846	17.3581	17.3943	17.129	17.2169	17.6771	17.6349	17.4148	17.9088	17.8312	17.7336	17.65	17.7309	17.5249	18.0506	18.0725	17.7908	17.2296	16.9451	17.1306	17.6696	17.7692
Aimp2	Q8R010	Q8R010	Aminoacyl tRNA synthase complex-interacting multifunctional protein 2	0	0	0	0.973874	1.15302	1.21759	1.49964	-0.0381933	0.205417	0.28403	0.584613	0.384158	0.12868	0.0218856	9.26339e-05	3	3	3	3	3	3	3	3	17.0433	16.9826	17.1077	16.9953	16.9876	17.0361	17.6963	17.4398	17.5643	17.7026	17.9278	17.6863	17.9677	18.1541	17.9538	18.2941	18.2424	18.3912	16.8808	16.9447	16.9332	17.458	17.4908
Aip	O08915	O08915	AH receptor-interacting protein	0	0	0	0.944913	1.08918	1.09078	0.98978	-0.0817467	0.123237	0.12536	-0.01482	0.397388	0.344195	0.572669	0.919367	3	3	3	3	3	3	3	3	17.7371	17.7187	17.7287	17.8009	17.6353	17.503	18.3158	18.3509	17.9968	18.3892	18.3318	18.3122	18.6158	18.6735	18.058	18.4626	18.6474	18.6133	18.4392	18.4445	18.2772	18.6243	18.242
Ak1	Q9R0Y5	Q9R0Y5	Adenylate kinase isoenzyme 1	0	0	0	0.861688	1.04688	1.08129	0.862167	-0.214763	0.06609	0.112757	-0.21396	0.0298242	0.483062	0.27049	0.242958	3	3	3	3	3	3	3	3	21.1872	21.3458	21.3075	21.1321	21.0819	20.9822	21.3986	21.6015	21.3275	21.5462	21.4635	21.5161	21.8669	21.8295	21.6216	21.9224	21.9368	21.7971	21.6818	21.7565	21.2668	21.4056	21.3707
Ak2	Q9WTP6	Q9WTP6	Adenylate kinase 2, mitochondrial	0	0	0	1.01163	1.04478	1.06528	1.01104	0.01668	0.0632033	0.0912333	0.0158333	0.833538	0.620543	0.516229	0.947974	3	3	3	3	3	3	3	3	19.8402	19.8966	19.8933	19.9935	19.9331	19.7535	19.9851	19.6629	19.6455	19.7622	19.8161	19.9048	20.2074	20.1891	19.8335	20.1904	20.2243	20.0891	19.9175	19.9276	19.307	19.6067	19.9293
Ak3	Q9WTP7	Q9WTP7	GTP:AMP phosphotransferase AK3, mitochondrial	0	0	0	1.02289	0.506417	0.705446	1.10205	0.0326567	-0.981603	-0.503393	0.14019	0.371104	0.00381332	0.0287209	0.00951395	3	3	3	3	3	3	3	3	18.4749	18.5805	18.5564	18.5617	18.5807	18.5674	20.4172	20.2544	20.5543	19.6327	19.1653	19.4831	20.1262	19.9491	20.363	19.7364	19.7311	19.4607	19.6366	19.5383	19.5595	19.717	19.724
Ak4	Q9WUR9	Q9WUR9	Adenylate kinase 4, mitochondrial	0	0	0	1.22809	0.344621	0.457576	1.05982	0.29642	-1.53692	-1.12792	0.08382	0.375896	0.00136963	0.0880996	0.787927	3	3	3	3	3	3	3	3	14.6077	14.9814	13.995	14.6703	14.8861	14.917	18.6624	18.5091	18.9051	17.3288	16.8443	17.2928	18.1826	17.5069	19.0149	17.3917	17.3189	16.6101	16.1372	17.0675	16.8215	16.6316	16.722
Akap1	O08715	O08715	A-kinase anchor protein 1, mitochondrial	0	0	0	0.93194	3.72297	8.87459	2.43298	-0.101692	1.89645	3.14968	1.28273	NaN	0.354962	0.156977	0.497758	3	2	3	3	3	3	3	3	18.6127	19.5033	20.1605	NaN	19.8106	18.8371	14.0515	14.8267	14.2013	14.929	14.0237	19.816	20.2148	14.4837	15.3709	20.4315	19.7878	19.2993	18.1994	13.8774	18.1678	18.2673	19.548
Akap10	O88845	O88845	A-kinase anchor protein 10, mitochondrial	0	0	0	0.973566	1.05643	1.31928	1.29832	-0.03865	0.0791933	0.39975	0.37665	0.625333	0.300484	0.000682197	9.8568e-07	3	3	3	3	3	3	3	3	15.3718	15.3451	15.4319	15.2086	15.4289	15.3954	16.3984	16.4669	16.3227	16.5589	16.3797	16.4869	16.6245	16.5678	16.6667	17.0614	17.0373	16.9596	16.1781	16.1973	16.1808	16.5651	16.5529
Akap12	Q9WTQ5	Q9WTQ5	A-kinase anchor protein 12	0	0	0	NaN	0.354095	0.507167	0.959523	NaN	-1.49779	-0.979467	-0.05961	NaN	NaN	0.0825994	0.902873	0	1	2	3	3	3	3	3	NaN	NaN	NaN	NaN	12.4736	NaN	NaN	15.4689	15.6453	13.9356	13.9839	14.2586	15.2531	14.5302	15.9684	14.2026	14.1582	14.4525	14.2416	13.8116	14.6812	14.2744	13.4802
Akap13	E9Q394	E9Q394	A-kinase anchor protein 13	0	0	0	1.00558	0.794666	1.0461	0.815566	0.00803	-0.33158	0.0650267	-0.294127	0.962067	0.0684263	0.80785	0.316528	3	3	3	3	3	3	3	3	15.982	16.0337	16.2897	16.3622	15.9587	16.0086	17.8475	17.7076	18.0171	17.3274	17.6403	17.6096	18.5336	18.1231	17.7533	17.9996	18.3733	18.2322	16.9226	16.7628	16.8913	16.1778	17.0392
Akap2	O54931	O54931	A-kinase anchor protein 2	0	0	0	NaN	0.718615	NaN	NaN	NaN	-0.47671	NaN	NaN	NaN	NaN	NaN	NaN	0	0	2	2	3	0	1	0	NaN	NaN	NaN	NaN	NaN	NaN	NaN	13.4825	13.503	13.393	12.639	NaN	13.6736	13.784	13.9191	NaN	NaN	NaN	NaN	NaN	12.1782	NaN	NaN
Akap5	D3YVF0	D3YVF0	A-kinase anchor protein 5	0	0	1	0.96549	0.750125	1.10127	2.05497	-0.0506667	-0.414797	0.139163	1.03912	0.562572	0.045932	0.571285	0.00131531	3	3	3	3	3	3	3	3	14.5719	14.5526	14.5493	14.3571	14.6304	14.5342	16.2694	16.3703	16.7069	16.0601	15.9204	16.1217	15.8451	15.5289	16.2963	16.1058	15.9969	15.9851	15.0313	14.7051	14.6925	15.9806	15.8054
Akap7	O55074;Q7TN79	O55074	A-kinase anchor protein 7 isoform alpha;A-kinase anchor protein 7 isoform gamma	0	0	0	1.23906	0.556353	0.947523	1.18317	0.30925	-0.845927	-0.0777667	0.242653	NaN	0.0860839	0.920034	0.643016	1	1	3	3	3	3	3	3	NaN	NaN	12.138	NaN	12.4473	NaN	15.9768	15.8851	17.0157	15.5951	15.2879	15.4569	15.2833	14.1937	16.5349	15.5903	15.46	14.7283	13.6138	13.0995	14.6607	14.2966	13.7597
Akap8	Q9DBR0	Q9DBR0	A-kinase anchor protein 8	0	0	0	1.15049	1.21989	1.07423	0.870732	0.20225	0.286747	0.103303	-0.1997	0.547679	0.118787	0.399604	0.490666	3	3	3	3	3	3	3	3	14.8837	14.5306	13.8874	14.5269	14.8359	14.5456	15.8888	16.1224	15.6892	16.0416	16.2683	16.2507	16.8156	16.5765	16.4512	16.7277	16.7543	16.6712	16.2823	16.5369	16.711	16.7574	15.9778
Akap9	Q70FJ1	Q70FJ1	A-kinase anchor protein 9	0	0	0	1.07896	1.15373	1.14638	1.41965	0.109643	0.2063	0.197087	0.505537	0.690053	0.28951	0.0718224	6.75284e-05	3	3	3	3	3	3	3	3	12.203	12.16	11.842	11.7495	12.5315	12.253	15.0261	15.2242	14.8078	15.458	15.0656	15.1535	15.3505	15.264	15.1756	15.5314	15.5159	15.334	14.0863	14.0147	14.1052	14.5563	14.5922
Akr1a1	Q9JII6	Q9JII6	Alcohol dehydrogenase [NADP(+)]	0	0	0	0.91636	1.16518	1.30735	1.79496	-0.126013	0.220557	0.386647	0.843953	0.130656	0.0129582	0.012518	0.000191837	3	3	3	3	3	3	3	3	21.4958	21.4612	21.6006	21.4956	21.332	21.352	21.8007	21.9653	21.8666	22.1075	22.0605	22.1263	21.8924	22.0532	21.9456	22.4102	22.4417	22.1992	21.6424	21.69	21.733	22.5399	22.4276
Akr1b1	P45376	P45376	Aldose reductase	0	0	0	0.918635	1.22848	1.10273	1.0177	-0.122437	0.29688	0.141073	0.02531	0.32718	0.0030134	0.282494	0.781246	3	3	3	3	3	3	3	3	22.428	22.319	22.5062	22.485	22.1827	22.2181	23.2125	23.1626	23.0663	23.4523	23.4687	23.4111	23.1061	23.2278	22.8724	23.1919	23.1419	23.2956	22.7085	22.6679	22.5234	22.582	22.7859
Akr1b7	P21300	P21300	Aldose reductase-related protein 1	0	0	0	0.980065	0.973541	0.900907	0.725473	-0.02905	-0.0386867	-0.15055	-0.463007	0.791005	0.539924	0.247035	0.00037138	3	3	3	3	3	3	3	3	19.2651	19.075	19.1847	19.2346	19.2301	18.973	19.9019	19.8388	19.8183	19.7272	19.8085	19.9072	19.9658	20.0882	19.912	19.7908	19.6969	20.0268	19.6392	19.7423	19.6482	19.1744	19.2051
Akr1b8	P45377	P45377	Aldose reductase-related protein 2	0	0	0	0.963304	0.909249	0.825904	0.726075	-0.0539367	-0.137253	-0.275953	-0.46181	0.357709	0.125414	0.166706	0.0579146	3	3	3	3	3	3	3	3	18.6298	18.5988	18.5004	18.5908	18.4926	18.4838	19.7719	19.721	19.5928	19.6516	19.5044	19.5179	19.9875	19.9113	19.8623	19.5435	19.433	19.9567	19.3094	19.3389	19.0261	19.0036	18.5051
Akr1c13	Q8VC28	Q8VC28	Aldo-keto reductase family 1 member C13	0	0	0	0.979264	1.17113	1.16092	0.922651	-0.03023	0.2279	0.215273	-0.116143	0.832398	0.311125	0.305593	0.815748	3	3	3	3	3	3	3	3	14.3316	14.7135	14.3591	14.3345	14.5088	14.4702	15.1941	14.9797	14.5307	15.1633	15.0878	15.1371	15.1733	15.1012	14.8377	14.9494	15.4312	15.3774	15.1392	14.6687	14.8552	14.0656	14.6516
Akr1e2	Q9DCT1	Q9DCT1	1,5-anhydro-D-fructose reductase	0	0	0	0.93994	1.03675	0.937554	0.920685	-0.08936	0.0520733	-0.0930267	-0.11922	0.452864	0.58979	0.26054	0.497982	3	3	3	3	3	3	3	3	17.2672	17.3403	17.5816	17.3917	17.217	17.3123	18.7738	18.5791	18.8446	18.7715	18.7224	18.8599	18.621	18.5489	18.3862	18.4005	18.4524	18.4241	17.8405	17.9114	17.6141	17.4236	17.879
Akr7a2	Q8CG76	Q8CG76	Aflatoxin B1 aldehyde reductase member 2	0	0	0	0.969229	1.17009	1.25053	1.31278	-0.04509	0.226623	0.32254	0.392627	0.343871	0.0946384	0.00136532	0.0398073	3	3	3	3	3	3	3	3	18.4728	18.464	18.5523	18.5134	18.4261	18.4143	18.8537	19.0638	18.9649	19.2518	19.0202	19.2903	19.2586	19.259	19.1917	19.5371	19.5142	19.6256	18.998	18.9904	18.6091	19.2406	19.2277
Akt1	P31750	P31750	RAC-alpha serine/threonine-protein kinase	0	0	0	1.05785	1.15248	1.03303	1.04424	0.0811333	0.204747	0.0468867	0.06246	0.361143	0.0211438	0.654658	0.257839	3	3	3	3	3	3	3	3	17.306	17.2398	17.3466	17.4788	17.4189	17.2381	17.8034	17.8723	17.8816	17.9579	18.1002	18.1135	17.9859	18.1592	17.871	17.9634	18.0601	18.1333	17.7687	17.8599	17.8209	17.8534	17.8273
Akt1s1	Q9D1F4	Q9D1F4	Proline-rich AKT1 substrate 1	0	0	0	0.975903	0.942495	0.958393	0.570506	-0.03519	-0.0854433	-0.06131	-0.809687	0.921735	0.246063	0.590735	0.00294116	3	3	3	3	3	3	3	3	16.3775	16.05	16.3452	16.5897	16.4925	15.585	16.6933	16.61	16.6209	16.6699	16.4899	16.508	17.4599	17.5583	17.2212	17.4064	17.3531	17.296	17.1979	17.2107	16.8367	16.2254	16.2791
Akt2	Q60823	Q60823	RAC-beta serine/threonine-protein kinase	0	0	0	1.1338	0.978188	1.03702	1.36336	0.181167	-0.0318167	0.05245	0.447163	0.0195594	0.726862	0.60637	1.89222e-05	3	3	3	3	3	3	3	3	15.2144	15.2778	15.1754	15.478	15.3563	15.3768	15.6096	15.786	15.8687	15.6628	15.7157	15.7904	15.6776	15.7896	15.9943	15.8583	15.9032	15.8573	15.2151	15.2105	15.2498	15.7007	15.6563
Akt3	Q9WUA6	Q9WUA6	RAC-gamma serine/threonine-protein kinase	0	0	1	NaN	0.812217	1.26958	2.79712	NaN	-0.300063	0.344347	1.48394	NaN	0.17074	0.404176	0.0304117	0	2	3	3	3	3	3	3	NaN	NaN	NaN	11.9081	NaN	11.6839	14.5426	14.304	14.7904	14.3517	14.0206	14.3644	13.7298	14.3529	14.9803	14.8272	14.714	14.5548	13.3127	12.593	14.1437	14.9396	14.7331
Aktip	Q64362	Q64362	AKT-interacting protein	0	0	0	0.897836	0.877793	1.14662	1.53193	-0.155477	-0.188047	0.197393	0.61535	0.770654	0.367008	0.254114	0.0780828	3	3	3	3	3	3	3	3	14.171	15.1253	14.9384	14.8893	13.7899	15.0891	15.5122	14.9709	14.9576	15.003	14.9703	14.9032	15.2777	15.4237	15.0542	15.6536	15.3384	15.3559	15.0518	15.3428	14.7972	15.4892	16.0956
Alad	P10518	P10518	Delta-aminolevulinic acid dehydratase	0	0	0	1.06664	0.855514	1.03852	1.43703	0.0930667	-0.225137	0.05453	0.523093	0.416547	0.179669	0.742805	0.0159715	3	3	3	3	3	3	3	3	17.0662	17.3361	17.1741	17.4155	17.2426	17.1974	18.3714	18.1085	18.5199	18.1899	17.9713	18.1633	18.3372	18.213	18.6512	18.4872	18.5815	18.2963	17.5871	17.7928	17.8332	18.0881	18.2412
Alb	P07724	P07724	Serum albumin	0	-1	0	0.753655	0.878871	0.312697	0.393063	-0.408023	-0.186277	-1.67716	-1.34717	0.246234	0.491171	0.00132635	0.00907301	3	3	3	3	3	3	3	3	20.2529	19.7872	19.2944	19.2926	19.6009	19.2168	21.2441	21.2899	20.6005	20.9944	20.6521	20.9291	21.3802	21.1911	21.0255	19.5647	19.1855	19.8151	19.3893	19.6226	19.3509	18.5988	17.6614
Aldh16a1	Q571I9	Q571I9	Aldehyde dehydrogenase family 16 member A1	0	0	0	1.01122	1.29832	1.22903	1.02885	0.0160967	0.37665	0.29752	0.0410367	0.862464	0.000900576	0.100987	0.567881	3	3	3	3	3	3	3	3	18.3846	18.2079	18.191	18.3993	18.2265	18.2059	18.5893	18.53	18.5507	18.8688	18.928	19.0032	19.1134	19.1623	18.7268	19.3173	19.2471	19.3307	18.9485	18.9569	18.8336	18.9852	18.8513
Aldh18a1	Q9Z110	Q9Z110	Delta-1-pyrroline-5-carboxylate synthase	0	0	0	0.895459	0.879109	1.17953	1.18099	-0.1593	-0.185887	0.23821	0.239993	0.183482	0.1181	0.153736	0.0603311	3	3	3	3	3	3	3	3	18.155	18.4066	18.2334	18.1814	18.1607	17.9749	18.824	18.6941	18.917	18.7321	18.4999	18.6453	18.9852	18.9466	19.2779	19.2732	19.4719	19.1792	18.6307	18.8232	18.5392	18.9507	18.8262
Aldh1a1	P24549	P24549	Retinal dehydrogenase 1	0	0	0	0.789498	0.393941	0.43977	1.44651	-0.340993	-1.34395	-1.18518	0.532573	0.207414	0.0335637	0.0603833	0.0137603	3	3	3	3	3	3	3	3	15.7222	16.3359	15.6972	15.4249	15.5747	15.7327	18.7727	18.1325	18.7884	17.9419	16.7834	16.9365	17.7793	17.315	18.6429	17.1593	16.6894	16.333	17.0447	16.7304	16.8583	17.237	17.5259
Aldh1b1	Q9CZS1	Q9CZS1	Aldehyde dehydrogenase X, mitochondrial	0	0	1	1.36698	0.323239	0.928837	1.64549	0.450997	-1.62933	-0.106503	0.718517	0.00880688	0.00215357	0.828372	0.0435727	3	3	3	3	3	3	3	3	14.4231	14.184	14.4822	14.7726	14.8581	14.8116	17.5293	17.2443	18.0051	16.0646	15.8382	15.9879	16.5231	15.793	17.2399	16.5836	16.6267	16.0262	15.5846	15.8863	16.2644	16.3775	16.8933
Aldh1l1	Q8R0Y6	Q8R0Y6	Cytosolic 10-formyltetrahydrofolate dehydrogenase	0	0	1	1.15604	0.33215	0.681189	1.85393	0.209187	-1.59009	-0.553873	0.89059	0.118986	0.00326048	0.275928	7.05693e-05	3	3	3	3	3	3	3	3	15.955	16.3108	16.1541	16.3949	16.3134	16.339	19.2181	18.8726	19.4628	17.8382	17.2294	17.7157	18.3343	18.1179	19.38	18.0482	18.4125	17.7099	17.4851	17.4054	17.4536	18.3177	18.2695
Aldh1l2	Q8K009	Q8K009	Mitochondrial 10-formyltetrahydrofolate dehydrogenase	0	0	1	0.858563	0.925097	1.43853	1.87544	-0.220003	-0.112323	0.524597	0.90723	0.139964	0.172134	0.113893	0.01129	3	3	3	3	3	3	3	3	15.7412	16.0639	15.6939	15.6701	15.5834	15.5855	16.4743	16.4814	16.6378	16.4094	16.3519	16.4951	16.6444	16.8189	16.6079	17.2351	17.6407	16.7691	16.3843	16.8447	16.1584	17.3291	17.4272
Aldh2	P47738	P47738	Aldehyde dehydrogenase, mitochondrial	0	0	1	1.07514	0.887242	1.25865	1.81659	0.10453	-0.1726	0.33188	0.861233	0.152528	0.15162	0.0347026	0.00487458	3	3	3	3	3	3	3	3	19.6962	19.8433	19.8417	19.8733	19.9649	19.8566	21.1623	21.0404	21.2829	21.1246	20.9112	20.932	20.9483	20.9563	21.2032	21.3551	21.4851	21.2633	20.4332	20.4234	20.1402	21.1073	21.4284
Aldh3a2	P47740	P47740	Fatty aldehyde dehydrogenase	0	0	0	0.927646	0.947525	0.911225	0.904641	-0.108353	-0.0777633	-0.13412	-0.144583	0.101023	0.208523	0.0733502	0.0176498	3	3	3	3	3	3	3	3	19.6003	19.6949	19.6114	19.6059	19.4655	19.5102	20.4403	20.5049	20.4379	20.4552	20.3998	20.2948	20.664	20.6996	20.5528	20.4472	20.5029	20.5639	20.2262	20.3106	20.2149	20.1473	20.0961
Aldh3b1	Q80VQ0	Q80VQ0	Aldehyde dehydrogenase family 3 member B1	0	0	0	0.950062	0.918527	0.871736	0.930974	-0.0739067	-0.122607	-0.198037	-0.103187	0.473334	0.167421	0.0236986	0.577279	3	3	3	3	3	3	3	3	18.4302	18.2322	18.4608	18.42	18.231	18.2504	19.1324	18.923	19.1421	18.9157	18.9577	18.9563	18.8449	18.9476	18.9729	18.6565	18.7209	18.7937	18.8295	18.9119	19.1633	19.1249	18.6569
Aldh4a1	Q8CHT0	Q8CHT0	Delta-1-pyrroline-5-carboxylate dehydrogenase, mitochondrial	0	0	0	1.01964	0.722828	0.736791	0.908365	0.0280633	-0.468277	-0.440673	-0.138657	0.726179	0.00374679	0.00439533	0.337844	3	3	3	3	3	3	3	3	18.1318	18.1239	18.2233	18.2982	18.1997	18.0652	19.3096	19.1575	19.3569	18.8899	18.7218	18.8075	19.1984	19.1718	19.3208	18.6713	18.8713	18.8263	18.4083	18.6597	18.2224	18.2641	18.3099
Aldh5a1	Q8BWF0	Q8BWF0	Succinate-semialdehyde dehydrogenase, mitochondrial	0	0	0	1.08298	0.216128	0.459703	0.699786	0.11501	-2.21004	-1.12123	-0.515013	0.207931	0.00334564	0.136619	0.107661	3	3	3	3	3	3	3	3	18.1019	18.2831	18.1217	18.3552	18.1855	18.3111	21.8424	21.4902	22.2934	20.1356	19.2124	19.6479	20.9528	20.1113	22.0727	20.156	20.0971	19.52	19.452	19.5355	20.115	19.4337	18.9625
Aldh6a1	Q9EQ20	Q9EQ20	Methylmalonate-semialdehyde dehydrogenase [acylating], mitochondrial	0	0	0	0.961787	0.595175	0.664822	1.08351	-0.05621	-0.748613	-0.58896	0.115713	0.300695	0.000342253	0.0358144	0.24661	3	3	3	3	3	3	3	3	20.0427	19.9727	20.0015	20.0335	19.9206	19.8941	21.4269	21.4215	21.5557	20.8172	20.6619	20.679	21.4519	21.1982	21.7704	20.9388	21.0092	20.7055	20.7429	20.5905	20.609	20.8966	20.7361
Aldh7a1	Q9DBF1	Q9DBF1	Alpha-aminoadipic semialdehyde dehydrogenase	0	0	0	1.0111	0.638651	0.761011	0.848034	0.0159267	-0.6469	-0.39401	-0.237807	0.834224	0.0151968	0.102466	0.0784566	3	3	3	3	3	3	3	3	19.3294	19.3641	19.3135	19.4887	19.261	19.3051	20.3381	20.1995	20.6909	19.8559	19.7867	19.6452	20.2265	20.162	20.7228	20.0017	20.0635	19.864	19.539	19.6698	19.5399	19.4347	19.1624
Aldh9a1	Q9JLJ2	Q9JLJ2	4-trimethylaminobutyraldehyde dehydrogenase	0	0	0	0.950235	0.975942	0.903928	1.00746	-0.0736433	-0.0351333	-0.14572	0.01072	0.513727	0.59273	0.101975	0.885781	3	3	3	3	3	3	3	3	20.5433	20.4593	20.4909	20.6236	20.3361	20.3129	21.2589	21.1211	21.0635	21.1443	21.1098	21.084	21.2995	21.3517	21.1247	21.1043	21.1096	21.1248	21.0494	21.0607	20.8751	21.0757	20.9862
Aldoa	P05064	P05064	Fructose-bisphosphate aldolase A	0	1	0	0.996186	0.950837	1.66568	2.54097	-0.00551333	-0.07273	0.73611	1.34538	0.894607	0.621866	0.0248354	0.000115996	3	3	3	3	3	3	3	3	22.3541	22.3528	22.4265	22.433	22.3363	22.3475	23.8194	23.5739	23.937	23.8328	23.545	23.7343	23.5412	23.2778	23.8441	24.4053	24.4387	24.0274	22.8991	23.1273	23.1551	24.4833	24.3709
Aldoc	P05063	P05063	Fructose-bisphosphate aldolase C	0	0	0	1.07907	0.235555	0.446258	1.41165	0.10979	-2.08586	-1.16405	0.497383	0.227237	0.00226353	0.0838179	0.00282628	3	3	3	3	3	3	3	3	18.0342	18.2477	18.2589	18.2465	18.2932	18.3305	21.9096	21.4474	22.0017	20.1054	19.2535	19.7423	20.8521	20.3746	21.9235	20.049	20.1592	19.4498	19.6792	19.5121	19.5959	20.2084	20.0154
Alg1	Q921Q3	Q921Q3	Chitobiosyldiphosphodolichol beta-mannosyltransferase	0	0	0	1.13729	1.12347	1.41798	1.17897	0.1856	0.167957	0.503833	0.237527	0.00919105	0.0700351	0.0210806	0.0654082	3	3	3	3	3	3	3	3	14.271	14.2688	14.2462	14.4999	14.4705	14.3724	14.9598	14.7548	14.916	15.0453	15.0934	14.9957	14.8429	15.2396	14.8744	15.431	15.5884	15.449	14.8898	15.0032	14.8365	15.3008	15.1128
Alg10b	Q3UGP8	Q3UGP8	Putative Dol-P-Glc:Glc(2)Man(9)GlcNAc(2)-PP-Dol alpha-1,2-glucosyltransferase	0	0	1	0.946086	1.03188	0.837118	1.7387	-0.0799567	0.04528	-0.256497	0.798007	0.376064	0.557623	0.0549695	0.00345515	3	3	3	3	3	3	3	3	15.9355	16.0427	16.1094	15.8738	16.0731	15.901	15.8697	16.0554	16.0931	16.0766	16.022	16.0555	16.1476	16.2929	16.3466	16.0416	16.1138	15.8622	15.3785	15.0306	15.3729	15.9664	16.0438
Alg11	Q3TZM9	Q3TZM9	GDP-Man:Man(3)GlcNAc(2)-PP-Dol alpha-1,2-mannosyltransferase	0	0	0	0.931166	1.00285	1.1054	1.3454	-0.10289	0.00411	0.14457	0.428033	0.00832301	0.973578	0.0707808	0.0354816	3	3	3	3	3	3	3	3	16.234	16.2143	16.2134	16.0795	16.1478	16.1257	17.0884	17.4149	17.3807	17.3971	17.2867	17.2126	17.6201	17.7176	17.569	17.8315	17.7015	17.8075	17.2975	17.2417	17.0823	17.4172	17.6532
Alg12	Q8VDB2	Q8VDB2	Dol-P-Man:Man(7)GlcNAc(2)-PP-Dol alpha-1,6-mannosyltransferase	0	0	0	1.24842	0.917466	0.525616	6.46388	0.320103	-0.124273	-0.92792	2.6924	0.13079	0.46996	0.223181	0.0124319	3	3	3	3	3	3	3	3	16.0146	15.4851	15.6713	16.1771	15.9729	15.9814	17.2648	17.6009	17.6155	17.1619	17.5086	17.4378	17.3499	17.5162	19.3496	17.0096	17.2264	17.1959	15.4713	15.3288	15.5399	16.9547	18.4137
Alg14	Q9D081	Q9D081	UDP-N-acetylglucosamine transferase subunit ALG14 homolog	0	0	0	3.85906	0.598307	0.736745	1.1254	1.94825	-0.741043	-0.440763	0.17044	0.126661	0.0180344	0.253858	0.538108	3	3	3	3	3	3	3	3	14.4405	13.9551	15.1328	14.608	16.9836	17.7816	18.55	18.3799	17.9667	17.7181	17.508	17.4475	17.3126	16.7522	17.4162	16.879	16.2131	17.0665	16.1215	15.9365	16.3769	15.9238	16.6808
Alg2	Q9DBE8	Q9DBE8	Alpha-1,3/1,6-mannosyltransferase ALG2	0	0	0	1.02041	0.831345	0.948281	1.00563	0.0291467	-0.26648	-0.0766133	0.00809667	0.491747	0.0151649	0.382659	0.953994	3	3	3	3	3	3	3	3	17.2076	17.2881	17.2738	17.3132	17.2266	17.317	18.0811	17.9556	18.1678	17.8416	17.766	17.7974	18.1453	18.0437	18.3092	18.0733	18.0831	18.1119	17.663	17.6337	17.7453	17.4367	17.7801
Alg3	Q8K2A8	Q8K2A8	Dol-P-Man:Man(5)GlcNAc(2)-PP-Dol alpha-1,3-mannosyltransferase	0	0	0	0.758055	0.544554	1.62158	0.69863	-0.399625	-0.876853	0.697398	-0.5174	NaN	NaN	NaN	NaN	2	2	1	3	2	3	2	2	NaN	11.7877	11.5331	NaN	11.6918	10.8298	NaN	14.1483	NaN	13.1901	13.7079	12.9164	NaN	12.1546	12.9475	12.6801	13.4076	13.6577	12.6329	NaN	13.6159	13.1834	12.0306
Alg5	Q9DB25	Q9DB25	Dolichyl-phosphate beta-glucosyltransferase	0	0	0	0.907708	1.06519	1.256	1.41246	-0.1397	0.0911167	0.32884	0.49821	0.275766	0.0916706	0.0720783	0.00699159	3	3	3	3	3	3	3	3	18.0852	18.1628	18.4198	17.9976	18.0995	18.1517	19.2791	19.3721	19.2773	19.354	19.4009	19.447	19.4108	19.5567	19.1959	19.7862	19.8175	19.5462	18.9683	18.9923	18.9969	19.2949	19.6183
Alg6	Q3TAE8	Q3TAE8	Dolichyl pyrophosphate Man9GlcNAc2 alpha-1,3-glucosyltransferase	0	0	0	1.24159	0.844721	0.847464	1.16872	0.312193	-0.243453	-0.238777	0.224933	0.00981125	0.42418	0.493781	0.552077	3	3	3	3	3	3	3	3	14.0896	13.9791	14.0744	14.4741	14.3199	14.2859	15.5329	14.9159	15.7254	14.9024	15.2404	15.301	15.8228	14.8954	15.8258	15.4032	15.2626	15.1619	14.3507	14.3495	15.3627	15.0446	14.9253
Alg8	Q6P8H8	Q6P8H8	Probable dolichyl pyrophosphate Glc1Man9GlcNAc2 alpha-1,3-glucosyltransferase	0	0	0	1.1484	0.960393	1.07183	3.45714	0.199623	-0.0583033	0.10007	1.78958	0.19651	0.778314	0.524787	0.241606	3	3	3	3	3	3	3	3	16.1771	15.87	16.3	16.3418	16.2844	16.3198	16.8939	16.958	16.7297	16.9719	16.9949	16.4399	16.8322	17.229	17.026	17.1391	17.2744	16.9739	16.2568	12.333	16.187	16.9763	16.6127
Alg9	Q8VDI9	Q8VDI9	Alpha-1,2-mannosyltransferase ALG9	0	0	0	0.916964	1.18981	0.987265	1.2631	-0.125063	0.250733	-0.01849	0.336967	0.0123336	0.0903604	0.890595	0.0201234	3	3	3	3	3	3	3	3	15.5649	15.6277	15.6507	15.5031	15.4629	15.5022	15.6622	15.6093	15.7361	15.7283	16.0969	15.9345	15.9598	16.1237	15.7786	15.9411	16.0668	15.7988	15.846	15.755	15.6364	15.9932	16.213
Alkbh3	Q8K1E6	Q8K1E6	Alpha-ketoglutarate-dependent dioxygenase alkB homolog 3	0	0	0	1.09713	1.18708	0.978832	0.797944	0.133737	0.247413	-0.0308667	-0.32564	0.0589813	0.174538	0.884113	0.189884	3	3	3	3	3	3	3	3	14.9276	14.7732	14.8253	15.0229	14.9512	14.9532	14.6662	15.114	14.9372	15.0076	15.254	15.198	15.6254	15.679	15.0617	15.4388	15.3797	15.4549	15.3434	15.6044	15.2839	15.0143	14.8119
Alox15	P39654	P39654	Arachidonate 15-lipoxygenase	0	0	0	1.31742	2.80217	1.3162	0.560061	0.397713	1.48654	0.396375	-0.836343	0.600297	0.385225	NaN	NaN	3	3	3	3	2	3	3	1	15.7516	14.6716	14.9906	16.7637	15.0981	14.7453	14.1623	12.7492	16.9303	17.0183	14.2875	16.9957	NaN	13.8113	17.5846	17.4237	16.9301	13.9291	17.4155	13.9958	14.3656	NaN	14.4226
Alox5	P48999	P48999	Arachidonate 5-lipoxygenase	0	0	0	1.01064	1.20043	1.15876	1.58362	0.01527	0.26355	0.21258	0.663223	0.735219	0.147386	0.12256	0.106381	3	3	3	3	3	3	3	3	17.8591	17.7781	17.8685	17.8988	17.8596	17.7931	18.5311	18.2158	18.4413	18.6018	18.878	18.4991	18.5181	18.694	18.5221	18.8873	18.6064	18.8781	18.5187	17.6912	18.6542	18.8498	19.1646
Alox5ap	P30355	P30355	Arachidonate 5-lipoxygenase-activating protein	0	0	0	0.939345	0.887257	0.609281	0.610602	-0.0902733	-0.172577	-0.71482	-0.711697	0.678275	0.227165	0.00200855	0.104683	3	3	3	3	3	3	3	3	20.841	21.0554	21.4855	21.12	20.8972	21.0939	22.2844	22.1533	22.2179	21.9569	22.2742	21.9068	21.7039	21.9423	21.7809	21.0611	20.9915	21.23	20.6123	20.5567	20.3564	19.312	20.4304
Alpl	P09242	P09242	Alkaline phosphatase, tissue-nonspecific isozyme	0	0	0	NaN	0.0265865	1.86065	0.695595	NaN	-5.23316	0.895805	-0.52368	NaN	0.000154979	NaN	0.715439	0	1	3	3	3	2	3	3	NaN	NaN	NaN	NaN	10.2405	NaN	17.7333	17.0722	17.8923	12.5249	11.7808	12.6927	17.1457	14.0487	18.0066	NaN	17.1163	17.4759	16.5005	16.5943	13.2773	14.1775	14.1395
Als2	Q920R0	Q920R0	Alsin	0	0	0	0.820359	0.994702	0.67569	2.58539	-0.285673	-0.00766333	-0.565567	1.37038	NaN	0.96867	0.527355	0.121457	3	1	3	3	3	3	3	3	12.4164	13.0302	13.5223	NaN	NaN	12.704	14.7694	14.4813	14.8302	14.9077	14.7462	14.404	17.1569	14.8151	14.6079	14.8958	15.0078	14.9795	13.9544	13.8957	13.9267	14.5298	16.6912
Alyref	O08583	O08583	THO complex subunit 4	0	0	0	0.928403	1.17197	1.13652	1.06229	-0.107177	0.22894	0.18462	0.0871767	0.693249	0.224847	0.134572	0.404562	3	3	3	3	3	3	3	3	17.0301	17.547	17.4453	17.0564	17.6272	17.0173	18.4191	18.1774	17.9398	18.437	18.5286	18.2575	18.3334	18.3319	18.075	18.5218	18.3555	18.4169	17.7568	17.7752	17.4898	17.7372	17.7919
Amacr	O09174	O09174	Alpha-methylacyl-CoA racemase	0	0	0	0.984712	0.914186	1.26785	1.20191	-0.0222267	-0.12944	0.34238	0.265323	0.923562	0.354729	0.219498	0.283086	3	3	3	3	3	3	3	3	14.06	14.696	14.4689	14.4481	14.543	14.1672	15.5312	15.4189	15.7098	15.5957	15.3859	15.29	15.4878	15.6629	14.9121	15.654	15.615	15.8208	15.4946	15.6154	15.0678	15.848	15.3964
Amdhd2	Q8JZV7	Q8JZV7	N-acetylglucosamine-6-phosphate deacetylase	0	0	0	0.970917	1.40293	1.68324	1.43467	-0.04258	0.488443	0.75124	0.520723	0.717649	0.000844416	0.026288	0.0015046	3	3	3	3	3	3	3	3	18.7499	18.6237	18.802	18.8726	18.6127	18.5626	18.9371	18.9327	18.8006	19.3577	19.3392	19.4389	19.2387	19.2914	18.69	19.8296	20.0014	19.6429	19.1054	19.2268	19.0154	19.6046	19.6923
Amer2	Q8CCJ4	Q8CCJ4	APC membrane recruitment protein 2	0	0	0	0.752296	0.54761	0.682506	NaN	-0.410628	-0.86878	-0.551087	NaN	NaN	NaN	0.27432	NaN	3	2	2	1	3	3	3	0	11.5278	12.0533	12.4502	NaN	11.5959	11.6037	13.5377	NaN	13.9191	12.8597	NaN	NaN	13.2428	12.7581	14.1611	12.9242	12.5575	13.0271	12.6518	12.6738	12.7717	NaN	NaN
Amfr	Q9R049	Q9R049	E3 ubiquitin-protein ligase AMFR	0	0	0	1.02187	1.18578	0.926498	0.756391	0.0312133	0.245837	-0.11014	-0.402797	0.679098	0.123713	0.199275	0.0242721	3	3	3	3	3	3	3	3	15.8954	15.8931	15.7902	16.0111	15.847	15.8143	16.2283	15.8155	16.086	16.2242	16.2929	16.3503	16.6519	16.7199	16.6881	16.5693	16.6994	16.4608	16.3952	16.35	16.1955	16.0449	15.9646
Ampd2	Q9DBT5	Q9DBT5	AMP deaminase 2	0	0	0	0.949614	0.951105	1.37416	1.53053	-0.0745867	-0.0723233	0.458553	0.614033	0.436318	0.538314	0.0135655	0.000461086	3	3	3	3	3	3	3	3	16.7214	16.7035	16.7887	16.7981	16.514	16.6777	17.8953	17.8097	18.1547	17.9061	17.8239	17.9128	18.0033	17.9543	18.2951	18.5684	18.4967	18.5632	17.6692	17.5767	17.7114	18.2127	18.2359
Ampd3	O08739	O08739	AMP deaminase 3	0	0	0	0.973595	0.707754	0.735682	0.852678	-0.0386067	-0.49868	-0.442847	-0.229927	0.54859	0.107986	0.0061106	0.0259589	3	3	3	3	3	3	3	3	16.7472	16.8261	16.9304	16.8474	16.7666	16.7739	17.8153	17.436	17.9002	16.8483	17.5099	17.2972	17.3646	17.5032	17.6387	17.1072	17.0575	17.0133	16.7184	16.6767	16.6695	16.4954	16.5472
Amph	Q7TQF7	Q7TQF7	Amphiphysin	0	0	0	0.941528	0.807893	0.680302	0.490413	-0.0869233	-0.307763	-0.555753	-1.02793	0.633514	0.134127	0.0140241	0.00799012	3	3	3	3	3	3	3	3	20.2611	20.1777	20.6485	20.4418	20.1536	20.231	23.4508	23.2655	23.4807	22.9718	23.3888	22.913	22.5812	22.5583	22.6465	22.2086	21.7826	22.1275	20.5259	20.5779	21.1406	19.8187	19.7607
Amz1	Q8BVF9	Q8BVF9	Archaemetzincin-1	0	0	0	1.11006	2.07778	1.42021	1.79179	0.15064	1.05504	0.506108	0.8414	0.438733	NaN	NaN	0.326565	3	3	2	3	2	3	3	3	13.5928	13.2145	13.4165	13.8201	13.4991	13.3564	12.516	12.8725	NaN	14.0991	13.4769	13.672	14.0205	14.1315	NaN	14.8976	14.4659	14.3828	14.1837	14.2607	12.0163	14.6347	14.2673
Amz2	Q400C8	Q400C8	Archaemetzincin-2	0	0	0	0.860746	0.743518	0.98832	1.23767	-0.21634	-0.42756	-0.01695	0.307627	0.0506662	0.319052	0.802295	0.305277	3	3	3	3	3	3	3	3	12.688	12.5766	12.5409	12.2683	12.4909	12.3972	15.534	14.3441	14.5199	14.3391	14.4927	14.2835	14.5504	14.6091	14.7165	14.6825	14.5425	14.6001	13.1434	13.6511	13.9418	14.0576	13.6576
Anapc1	P53995	P53995	Anaphase-promoting complex subunit 1	0	0	0	1.24163	1.28793	1.48094	1.94185	0.31223	0.365057	0.566513	0.957433	0.391829	0.0382846	0.0261894	0.000216077	3	3	3	3	3	3	3	3	14.4495	14.1798	13.4013	14.4728	14.1787	14.3158	15.2337	15.0488	15.4352	15.6205	15.5212	15.6713	15.2198	15.6039	15.7649	16.0684	16.1563	16.0634	14.9614	15.0454	14.8139	15.8827	15.9594
Anapc2	Q8BZQ7	Q8BZQ7	Anaphase-promoting complex subunit 2	0	0	0	0.942386	1.09962	1.40371	1.60461	-0.08561	0.13701	0.489243	0.682227	0.405763	0.106076	0.00853019	0.00261292	3	3	3	3	3	3	3	3	14.0098	13.9459	13.8739	13.6921	13.959	13.9216	15.5493	15.4403	15.4341	15.6932	15.5089	15.6326	15.6484	15.8544	15.841	16.178	16.4227	16.2109	15.3326	15.1316	15.2472	15.794	15.8854
Anapc4	Q91W96	Q91W96	Anaphase-promoting complex subunit 4	0	0	0	0.905241	1.24357	1.14722	1.29841	-0.143627	0.314487	0.198137	0.376743	0.0406291	0.200342	0.0244905	0.167957	3	3	3	3	3	3	3	3	17.156	17.1408	17.2442	16.9862	17.1058	17.0181	16.7797	17.3522	17.227	17.2181	17.5119	17.5723	17.6376	17.7098	17.8178	17.9509	17.9283	17.8804	16.9461	17.0156	17.1467	17.1945	17.1988
Anapc5	Q8BTZ4	Q8BTZ4	Anaphase-promoting complex subunit 5	0	0	0	1.00358	1.14221	1.28358	1.53951	0.00516	0.19183	0.360173	0.622473	0.971115	0.252379	0.0272555	0.0343938	3	3	3	3	3	3	3	3	14.3638	14.3857	14.5526	14.5645	14.5537	14.1994	15.5662	15.6889	15.6158	16.0873	15.6287	15.7303	15.8491	16.1643	16.1467	16.4464	16.359	16.4353	15.2838	15.4069	15.8945	16.0336	16.1622
Anapc7	Q9WVM3	Q9WVM3	Anaphase-promoting complex subunit 7	0	0	0	1.40523	0.988021	1.0997	1.02428	0.490803	-0.0173867	0.137107	0.0346067	0.408426	0.934127	0.13467	0.866576	3	3	3	3	3	3	3	3	12.735	13.6518	12.2493	13.5267	13.8595	12.7224	15.5299	15.0827	14.9771	15.3719	15.0264	15.1393	15.4186	15.4957	15.2616	15.5429	15.5638	15.4805	15.0756	15.4901	14.8371	15.1244	15.2282
Angel2	Q8K1C0	Q8K1C0	Protein angel homolog 2	0	0	0	1.2494	1.09817	0.752032	0.661138	0.32123	0.135103	-0.411133	-0.596977	0.0968736	0.848997	0.045983	0.0297061	3	3	3	3	3	3	3	3	13.7997	13.4812	13.4199	14.0304	13.9149	13.7192	13.3837	13.4571	12.5184	12.552	12.7787	14.4339	14.3874	14.2019	14.3158	13.77	13.7449	14.1567	14.0965	14.3322	14.3654	13.9864	13.5146
Ank1	Q02357	Q02357	Ankyrin-1	0	0	0	0.330075	0.41367	0.471732	1.53542	-1.59914	-1.27345	-1.08396	0.618637	NaN	0.331322	0.0338604	0.286972	2	2	3	3	3	3	3	3	12.2264	13.3624	NaN	NaN	10.9504	11.4401	15.5175	15.0922	15.4569	15.8794	14.4131	11.9538	14.8089	14.6747	15.7277	14.0895	13.8152	14.0549	14.6168	14.5439	13.4588	14.1713	15.2964
Ank2	Q8C8R3	Q8C8R3	Ankyrin-2	0	0	0	1.59634	0.318678	0.549976	1.17635	0.674767	-1.64983	-0.86256	0.234317	0.000456561	0.00456873	0.190214	0.337629	3	3	3	3	3	3	3	3	14.2833	14.3267	14.3657	14.9342	14.9473	15.1185	18.4629	18.2927	19.0902	17.2055	16.6771	17.0138	18.3564	17.3963	19.2118	17.6735	17.5504	17.1529	17.4876	17.3082	17.8617	18.045	17.561
Ank3	G5E8K5	G5E8K5	Ankyrin-3	0	0	0	NaN	0.15125	0.347535	0.873434	NaN	-2.72499	-1.52477	-0.19523	NaN	0.00837994	0.0958019	0.790854	0	2	3	3	3	3	3	3	NaN	NaN	NaN	NaN	10.5688	13.4922	15.5143	14.9276	16.0132	13.5808	11.9634	12.7359	15.4429	14.18	16.0681	14.3724	13.8439	12.9004	14.0601	14.203	15.424	14.4599	13.3965
Ankfy1	Q810B6	Q810B6	Rabankyrin-5	0	0	0	0.980673	1.00253	0.808898	0.745657	-0.0281567	0.00364333	-0.30597	-0.423417	0.76812	0.954081	0.017383	0.00539805	3	3	3	3	3	3	3	3	18.1725	18.1937	18.1918	18.3356	18.0766	18.0614	18.3291	18.5033	18.3414	18.3568	18.4053	18.4226	18.5829	18.6866	18.5142	18.197	18.267	18.4017	18.5456	18.4483	18.3	18.0421	17.9491
Ankh	Q9JHZ2	Q9JHZ2	Progressive ankylosis protein	1	0	0	0.850425	2.76043	3.97552	7.04336	-0.233743	1.46489	1.99114	2.81626	0.578663	0.0353262	0.00103049	0.000366054	3	3	3	3	3	3	3	3	13.5083	13.669	14.0914	13.7689	12.8392	13.9593	14.0906	15.5931	14.7896	16.391	15.9455	16.5314	15.3087	15.2431	15.7594	17.5928	17.5981	17.0936	15.3094	14.5988	14.6958	17.6597	17.9012
Ankib1	Q6ZPS6	Q6ZPS6	Ankyrin repeat and IBR domain-containing protein 1	0	0	0	1.38111	1.54029	1.24737	2.1185	0.465827	0.623203	0.31889	1.08304	0.522554	0.219369	0.143229	0.0713746	3	3	3	3	3	3	3	3	14.1345	15.3023	16.2376	15.2921	16.2054	15.5744	15.2544	16.1318	15.9968	15.7846	16.8974	16.5706	16.1743	16.3072	16.4489	16.9388	16.4357	16.5125	16.7549	15.5704	15.9583	17.0576	17.703
Ankle2	Q6P1H6	Q6P1H6	Ankyrin repeat and LEM domain-containing protein 2	0	0	0	1.04595	0.995472	1.15896	1.00616	0.06481	-0.00654667	0.212837	0.00886667	0.647916	0.955695	0.0727516	0.953276	3	3	3	3	3	3	3	3	15.2537	14.9102	15.0339	15.2327	14.9623	15.1972	16.9425	17.1877	16.9171	17.1315	16.8911	17.0051	17.2288	17.2245	16.9637	17.3614	17.3375	17.3566	16.3586	16.4448	16.1501	16.1992	16.5502
Ankmy2	Q3TPE9	Q3TPE9	Ankyrin repeat and MYND domain-containing protein 2	0	0	0	0.807699	1.24099	0.922433	1.27728	-0.30811	0.311493	-0.116483	0.353077	0.375514	0.0263512	0.545538	0.239424	3	3	3	3	3	3	3	3	14.0134	14.0794	14.3807	13.3524	14.3496	13.8471	15.291	15.5323	15.3283	15.5938	15.742	15.7503	15.6503	15.5621	15.9282	15.3234	15.7635	15.7043	14.9897	14.5218	14.7817	15.4817	14.7313
Ankrd13a	Q80UP5	Q80UP5	Ankyrin repeat domain-containing protein 13A	0	0	0	0.972203	1.17089	1.0554	1.01501	-0.04067	0.227607	0.0777967	0.0214933	0.282892	0.0159448	0.199533	0.724156	3	3	3	3	3	3	3	3	17.8415	17.8135	17.8783	17.8497	17.8053	17.7565	18.2373	18.2715	18.245	18.4585	18.584	18.3941	18.5703	18.699	18.5495	18.6502	18.684	18.718	18.1122	18.0529	18.2429	18.1644	18.1409
Ankrd17	Q99NH0	Q99NH0	Ankyrin repeat domain-containing protein 17	0	0	0	1.13013	1.22476	0.794695	0.664833	0.176483	0.292493	-0.331527	-0.588937	0.378614	0.0973409	0.00617525	0.0954684	3	3	3	3	3	3	3	3	15.8793	15.9509	15.4072	15.8643	15.8757	16.0268	15.6739	16.1208	15.7986	16.1598	16.2005	16.1104	16.3937	16.5245	16.5545	16.2346	16.1049	16.1386	16.2795	15.7813	15.7093	14.9612	15.3815
Ankrd40	Q5SUE8	Q5SUE8	Ankyrin repeat domain-containing protein 40	0	0	0	NaN	0.559645	0.993291	1.10457	NaN	-0.837415	-0.00971167	0.14348	NaN	NaN	NaN	NaN	1	0	2	1	3	2	1	2	NaN	14.9217	NaN	NaN	NaN	NaN	NaN	15.3303	15.2237	NaN	14.4396	NaN	15.589	15.3415	15.4783	15.9539	NaN	14.9658	NaN	NaN	15.3393	15.2874	NaN
Ankrd44	B2RXR6	B2RXR6	Serine/threonine-protein phosphatase 6 regulatory ankyrin repeat subunit B	0	0	0	1.04619	1.10316	0.960755	0.716069	0.0651467	0.14164	-0.05776	-0.48183	0.366698	0.157569	0.732188	0.000305301	3	3	3	3	3	3	3	3	19.1915	19.1776	19.0901	19.3248	19.1925	19.1373	19.7181	19.7163	19.4921	19.8383	19.7857	19.7274	20.0186	20.1586	19.6504	19.8042	19.9019	19.948	19.7031	19.7355	19.6104	19.2353	19.1846
Ankrd46	Q8BTZ5	Q8BTZ5	Ankyrin repeat domain-containing protein 46	0	0	0	1.11341	0.998442	1.48918	0.865961	0.15498	-0.00225	0.57452	-0.207627	0.604698	0.991422	0.0348653	0.569599	3	3	3	3	3	3	3	3	16.0022	15.363	15.2729	15.9498	15.7327	15.4205	15.5416	15.1235	15.4457	15.1573	15.2867	15.66	14.9262	14.8333	14.3739	15.3485	15.3544	15.1541	15.0243	15.1386	15.4684	15.6142	14.6314
Anks1a	P59672	P59672	Ankyrin repeat and SAM domain-containing protein 1A	0	0	-1	1.15391	1.08158	0.920819	0.686022	0.206533	0.113137	-0.11901	-0.543673	0.0561818	0.626305	0.099467	0.0174347	3	3	3	3	3	3	3	3	15.6904	15.4605	15.6552	15.8342	15.8427	15.7488	15.9723	16.6287	16.4407	16.5694	16.5294	16.2823	16.885	17.0112	16.8423	16.75	16.8036	16.828	16.6067	16.5898	16.7059	16.3475	16.0297
Anks1b	Q8BIZ1	Q8BIZ1	Ankyrin repeat and sterile alpha motif domain-containing protein 1B	0	0	0	NaN	0.0876302	0.513507	0.561949	NaN	-3.51243	-0.961543	-0.83149	NaN	0.058199	NaN	NaN	0	0	3	3	3	1	3	2	NaN	NaN	NaN	NaN	NaN	NaN	14.2204	14.1586	15.6808	12.4908	12.3351	8.69671	13.2154	12.9537	14.4949	12.5931	NaN	NaN	13.09	13.0661	12.3361	11.5619	NaN
Anln	Q8K298	Q8K298	Anillin	0	0	0	2.31488	0.254283	0.322306	0.985836	1.21093	-1.97549	-1.6335	-0.02058	NaN	0.00450126	0.0502665	0.953999	2	3	3	3	3	3	3	3	NaN	10.7024	12.5771	12.4332	12.671	13.4477	17.1832	17.0938	17.4964	15.7667	14.6768	15.4033	16.5698	16.0418	17.573	15.8347	14.8876	14.5617	16.0243	15.4898	16.3947	16.2151	15.5383
Ano10	Q8BH79	Q8BH79	Anoctamin-10	0	0	0	1.10648	0.962688	0.979212	1.22415	0.145983	-0.05486	-0.0303067	0.291783	0.189874	0.101958	0.573163	0.0280499	3	3	3	3	3	3	3	3	16.5608	16.4056	16.3997	16.4626	16.6167	16.7248	17.7984	17.78	17.7318	17.747	17.708	17.6905	18.0054	18.1033	18.0228	18.0558	18.0496	17.9352	17.2996	17.2611	17.3097	17.4144	17.6378
Ano6	Q6P9J9	Q6P9J9	Anoctamin-6	0	0	0	0.895724	0.982328	0.69888	0.775069	-0.158873	-0.0257233	-0.516883	-0.367603	0.246271	0.662202	0.00658729	0.0152205	3	3	3	3	3	3	3	3	16.7405	16.8351	16.9525	16.4864	16.7583	16.8069	17.707	17.849	17.7244	17.6761	17.7835	17.7437	17.9078	18.0641	17.9055	17.2748	17.503	17.5489	17.1997	17.0972	17.2689	16.7413	16.7502
Anp32a	O35381	O35381	Acidic leucine-rich nuclear phosphoprotein 32 family member A	0	0	0	1.16923	1.09001	1.09992	0.97447	0.225557	0.124337	0.137397	-0.03731	0.377765	0.109425	0.147647	0.775788	3	3	3	3	3	3	3	3	20.5151	20.67	20.0147	20.4907	20.8493	20.5364	22.0491	22.0839	22.06	22.2458	22.2509	22.0693	21.999	22.0472	21.8361	22.183	22.0565	22.0549	21.2435	21.341	21.3332	21.3415	21.4273
Anp32b	Q9EST5	Q9EST5	Acidic leucine-rich nuclear phosphoprotein 32 family member B	0	0	0	1.47935	1.37982	1.29899	1.2715	0.56496	0.464483	0.377387	0.346533	0.34068	0.0240111	0.0283466	0.00281172	3	3	3	3	3	3	3	3	18.4892	18.487	17.1873	18.4724	19.1827	18.2033	20.3726	20.4998	20.3143	21.0633	20.8664	20.6504	20.6001	20.7433	20.3703	20.9774	20.9774	20.8911	20.124	20.1642	20.0335	20.3931	20.5182
Anp32e	P97822	P97822	Acidic leucine-rich nuclear phosphoprotein 32 family member E	0	0	0	1.11809	1.30516	1.1068	1.10791	0.16104	0.38423	0.14639	0.147847	0.467939	0.0314454	0.229626	0.42158	3	3	3	3	3	3	3	3	17.6365	17.5094	17.0496	17.6401	17.6642	17.3744	17.5443	17.6479	17.468	18.1477	17.8597	17.8055	18.1246	18.2034	17.9255	18.3488	18.2052	18.1388	17.7934	17.7416	17.3409	17.9383	17.7035
Anxa1	P10107	P10107	Annexin A1	0	0	-1	0.90307	1.19115	0.903951	0.227853	-0.14709	0.252357	-0.145683	-2.13383	0.682885	0.305851	0.585471	0.00182469	3	3	3	3	3	3	3	3	15.4808	16.3022	16.5411	15.787	15.9867	16.1092	17.0836	17.005	16.8153	16.8361	17.317	17.5079	16.8687	17.1459	16.3382	16.5504	16.7674	16.5979	17.7386	17.1486	17.1485	15.6124	14.8836
Anxa11	P97384	P97384	Annexin A11	0	0	0	0.936679	1.38949	1.05234	0.957338	-0.0943733	0.474557	0.0736	-0.0629	0.44567	0.00351394	0.491197	0.474449	3	3	3	3	3	3	3	3	21.3899	21.6415	21.5695	21.6036	21.3375	21.3768	20.3012	20.4173	20.164	20.7224	20.8014	20.7824	20.7673	20.9139	20.5826	20.8325	20.8541	20.7982	20.4594	20.2421	20.2739	20.3364	20.2597
Anxa2	P07356	P07356	Annexin A2	0	1	0	0.978393	1.13028	1.56423	2.4696	-0.0315133	0.176677	0.645453	1.30428	0.870427	0.373693	0.022572	0.000484961	3	3	3	3	3	3	3	3	17.7383	18.3168	18.1469	17.9225	18.0699	18.115	18.7772	18.567	18.7948	19.2043	18.7894	18.6753	18.78	19.1152	19.1893	19.6758	19.8925	19.4526	18.8628	18.6888	18.7603	20.006	20.2993
Anxa3	O35639	O35639	Annexin A3	0	0	0	0.920162	1.20331	1.28274	1.33363	-0.12004	0.26701	0.359223	0.415353	0.0341834	0.112158	0.0536145	0.0296659	3	3	3	3	3	3	3	3	24.0493	24.0959	24.1298	24.0051	23.9979	23.9118	24.5057	24.3985	24.1423	24.7228	24.6542	24.4705	24.6086	24.6863	24.2619	24.8453	24.9246	24.8645	24.6004	24.5729	24.3289	24.9993	25.015
Anxa4	P97429	P97429	Annexin A4	0	0	0	0.930377	1.23742	1.28236	1.59142	-0.104113	0.30733	0.358807	0.670313	0.135129	0.00473368	0.0246031	9.7798e-05	3	3	3	3	3	3	3	3	19.5519	19.5949	19.5847	19.5628	19.4808	19.3756	20.1233	20.0915	20.023	20.4525	20.4074	20.2999	20.3514	20.3643	20.0633	20.602	20.6729	20.5805	20.0604	20.0139	19.9797	20.6212	20.7442
Anxa5	P48036	P48036	Annexin A5	0	1	0	0.992077	1.3551	2.25108	3.25964	-0.0114767	0.438397	1.17062	1.70471	0.838358	0.00953707	0.00195451	6.14229e-06	3	3	3	3	3	3	3	3	20.5919	20.574	20.5931	20.6792	20.5303	20.515	21.8377	21.7725	21.9588	22.4323	22.1681	22.2838	21.9803	22.0621	21.9328	23.3636	23.2721	22.8513	21.5815	21.5424	21.6513	23.2798	23.3796
Anxa6	P14824	P14824	Annexin A6	0	0	0	0.95625	0.88123	0.886134	0.79075	-0.06454	-0.18241	-0.174403	-0.338707	0.22634	0.0330469	0.00386745	0.0111729	3	3	3	3	3	3	3	3	21.4266	21.5465	21.5496	21.4813	21.4135	21.4344	21.7178	21.628	21.6717	21.4896	21.5784	21.4022	21.8404	21.8521	21.7853	21.6205	21.6902	21.6439	21.3634	21.3586	21.3662	20.9531	21.1758
Anxa7	Q07076	Q07076	Annexin A7	0	0	0	1.01025	1.15049	1.27988	1.39627	0.0147167	0.202247	0.356003	0.481573	0.908323	0.0219951	0.00554023	0.000362601	3	3	3	3	3	3	3	3	19.6155	19.4184	19.503	19.7382	19.4205	19.4224	20.2299	20.1009	20.0558	20.3613	20.2955	20.3364	20.1477	20.2918	20.1073	20.4781	20.5414	20.5952	19.9471	20.0165	19.9774	20.4048	20.534
Aoc3	O70423	O70423	Membrane primary amine oxidase	0	0	0	NaN	NaN	NaN	NaN	NaN	NaN	NaN	NaN	NaN	NaN	NaN	NaN	0	0	0	1	2	0	1	0	NaN	NaN	NaN	NaN	NaN	NaN	NaN	NaN	NaN	14.8197	NaN	NaN	NaN	15.8009	15.7562	NaN	NaN	NaN	NaN	NaN	14.1733	NaN	NaN
Aopep	Q8BXQ6	Q8BXQ6	Aminopeptidase O	0	0	0	1.17715	2.88594	0.847086	1.02551	0.2353	1.52904	-0.23942	0.0363467	0.480515	0.368604	0.350655	0.766207	3	3	3	3	3	3	3	3	15.5862	15.1582	15.2931	16.1037	15.4695	15.1702	12.4705	17.194	16.5981	16.6351	16.7183	17.4962	16.7911	17.3568	16.6995	16.8669	16.536	16.7263	16.5312	16.6316	16.2571	16.5418	16.4657
Ap1b1	O35643	O35643	AP-1 complex subunit beta-1	0	0	0	0.992569	0.885596	0.90057	0.871859	-0.01076	-0.17528	-0.15109	-0.197833	0.579637	0.0699977	0.0688093	0.127513	3	3	3	3	3	3	3	3	20.7536	20.8097	20.7971	20.7756	20.7667	20.7858	21.9223	21.8064	22.0466	21.7778	21.7199	21.7518	22.0474	21.9016	22.0867	21.8425	21.908	21.8319	21.2702	21.4231	21.4159	21.3498	21.1102
Ap1g1	P22892	P22892	AP-1 complex subunit gamma-1	0	0	0	0.960107	1.00371	1.05628	1.08934	-0.0587333	0.00534667	0.0789867	0.12346	0.370044	0.852766	0.0614466	0.0203322	3	3	3	3	3	3	3	3	18.8354	18.8766	18.9485	18.9177	18.7538	18.8128	19.6865	19.7669	19.715	19.7058	19.7516	19.7269	19.8906	19.9844	19.9099	20.0142	20.0218	19.9859	19.4857	19.5274	19.4296	19.5758	19.6022
Ap1g2	O88512	O88512	AP-1 complex subunit gamma-like 2	0	0	0	0.692888	0.981368	1.20575	1.33756	-0.529307	-0.0271333	0.269937	0.4196	0.052059	0.927495	0.142194	0.240298	3	3	3	3	3	3	3	3	15.7575	15.4498	15.2673	15.1516	15.0223	14.7128	15.67	16.0498	16.1916	15.4964	16.0533	16.2802	15.758	16.1881	16.1777	16.2295	16.3739	16.3302	15.7993	16.0546	15.8634	15.7603	16.4626
Ap1m1	P35585	P35585	AP-1 complex subunit mu-1	0	0	0	0.944494	1.06245	1.06652	1.00914	-0.0823867	0.08739	0.0929133	0.0131333	0.246312	0.101074	0.0233099	0.849506	3	3	3	3	3	3	3	3	19.7973	19.8542	19.9837	19.8423	19.791	19.7547	20.4208	20.5285	20.45	20.5454	20.6019	20.514	20.6956	20.6984	20.6441	20.7724	20.8053	20.7392	19.9364	19.8961	19.8944	19.8186	20.0373
Ap1s1	P61967	P61967	AP-1 complex subunit sigma-1A	0	0	1	0.99237	1.01225	1.27693	1.92087	-0.01105	0.0175667	0.35268	0.94176	0.889188	0.824961	0.0633052	0.0012126	3	3	3	3	3	3	3	3	17.2042	16.9956	17.1943	17.1027	17.1796	17.0786	17.8399	17.9929	18.0739	17.9655	17.9505	18.0434	18.0932	18.0294	18.3378	18.6472	18.562	18.3093	17.4113	17.4161	17.6789	18.453	18.3121
Ap1s2	Q9DB50	Q9DB50	AP-1 complex subunit sigma-2	0	0	0	0.983245	0.919391	0.841365	0.932038	-0.0243767	-0.12125	-0.249197	-0.10154	0.687275	0.0973906	0.116779	0.252554	3	3	3	3	3	3	3	3	18.4732	18.3533	18.4504	18.4754	18.4006	18.3278	19.0213	19.1477	19.0327	19.0234	18.9176	18.897	19.2871	19.4545	19.3544	18.9981	19.004	19.3462	19.0178	19.0381	19.0521	18.7844	19.0219
Ap2a1	P17426	P17426	AP-2 complex subunit alpha-1	0	0	0	1.09712	0.758582	0.932634	1.22357	0.133727	-0.398623	-0.100617	0.2911	0.0792763	0.0575234	0.673018	0.0471169	3	3	3	3	3	3	3	3	19.8001	19.6392	19.7282	19.8304	19.8163	19.922	21.3386	21.2158	21.6936	21.0372	20.9269	21.088	21.3141	21.0931	21.8268	21.3711	21.3318	21.2292	20.762	20.7832	21.0476	21.1302	21.0914
Ap2a2	P17427	P17427	AP-2 complex subunit alpha-2	0	0	0	1.0792	0.868883	0.823614	1.07627	0.109963	-0.202767	-0.27996	0.106037	0.202359	0.125503	0.182421	0.0893528	3	3	3	3	3	3	3	3	19.5622	19.5012	19.4827	19.7398	19.5042	19.632	20.8703	20.8271	21.1481	20.6867	20.7668	20.7838	21.1118	20.9591	21.4759	20.9494	21.0145	20.743	20.4759	20.3424	20.4477	20.4885	20.5225
Ap2b1	Q9DBG3	Q9DBG3	AP-2 complex subunit beta	0	0	0	1.08864	0.762118	0.888344	0.898757	0.122527	-0.391913	-0.17081	-0.153997	0.0129183	0.0581559	0.304778	0.0777241	3	3	3	3	3	3	3	3	19.8273	19.8145	19.792	19.9442	19.8832	19.9741	21.3526	21.1954	21.6709	21.0668	20.9117	21.0646	21.3853	21.2039	21.6961	21.2235	21.2961	21.2533	20.6586	20.788	20.647	20.4521	20.6081
Ap2m1	P84091	P84091	AP-2 complex subunit mu	0	0	0	1.17506	0.78635	0.844087	1.01112	0.23274	-0.346757	-0.244537	0.0159533	0.0322044	0.0941023	0.229861	0.929545	3	3	3	3	3	3	3	3	20.0791	20.0476	20.2135	20.4425	20.2676	20.3283	21.9954	21.8866	22.3998	21.7249	21.7138	21.8029	21.9881	21.7561	22.2643	21.8776	21.8174	21.5798	21.0541	20.9908	20.8794	20.6864	21.2373
Ap2s1	P62743	P62743	AP-2 complex subunit sigma	0	0	0	1.07023	0.766321	0.914241	1.41088	0.09792	-0.38398	-0.129353	0.496597	0.123947	0.0752591	0.682247	0.016847	3	3	3	3	3	3	3	3	19.2706	19.2094	19.3123	19.418	19.2832	19.385	20.7643	20.7436	21.2095	20.5075	20.4391	20.6189	20.753	20.5517	21.4834	20.7471	20.9532	20.6997	20.4008	20.27	20.3498	20.636	20.8237
Ap3b1	Q9Z1T1	Q9Z1T1	AP-3 complex subunit beta-1	0	0	0	1.19118	0.99792	0.972909	0.844838	0.25239	-0.00300333	-0.0396233	-0.243253	0.252586	0.968714	0.511467	0.00253319	3	3	3	3	3	3	3	3	18.504	18.4377	17.9468	18.5354	18.6748	18.4355	19.7436	19.7492	19.5811	19.6021	19.7604	19.7023	20.0379	20.1141	19.9495	20.0314	19.94	20.0113	19.7811	19.8304	19.7986	19.5809	19.6041
Ap3b2	Q9JME5	Q9JME5	AP-3 complex subunit beta-2	0	0	0	1.42806	0.828613	0.983777	0.877771	0.514053	-0.27123	-0.0235967	-0.188083	0.0846526	0.00945529	0.694592	0.182888	3	3	3	3	3	3	3	3	15.8416	16.0126	15.2981	16.1594	16.3636	16.1715	18.7782	18.7409	18.7804	18.397	18.5929	18.4959	18.7503	18.7514	18.8431	18.6833	18.7469	18.8438	18.757	18.9141	18.7285	18.5082	18.5121
Ap3d1	O54774	O54774	AP-3 complex subunit delta-1	0	0	0	1.23696	0.711362	0.937292	0.735199	0.306803	-0.491343	-0.09343	-0.443793	0.0418287	0.0335298	0.489974	0.0010863	3	3	3	3	3	3	3	3	17.2124	17.3198	17.0779	17.4843	17.6542	17.392	19.2944	19.1793	19.3503	19.0256	18.5208	18.8036	19.4811	19.2644	19.6856	19.4202	19.3585	19.372	18.7186	18.7099	18.8621	18.3427	18.3331
Ap3m1	Q9JKC8	Q9JKC8	AP-3 complex subunit mu-1	0	0	0	1.43527	0.939308	0.937088	0.817849	0.521327	-0.09033	-0.0937433	-0.290093	0.129691	0.221513	0.100717	0.0587499	3	3	3	3	3	3	3	3	17.384	17.3484	16.9434	18.1976	17.6331	17.4091	19.0459	18.9873	19.0717	18.8312	18.9883	19.0144	19.2855	19.3641	19.3511	19.2711	19.1665	19.2819	18.8665	19.0457	18.8044	18.5543	18.511
Ap3m2	Q8R2R9	Q8R2R9	AP-3 complex subunit mu-2	0	0	0	1.27313	0.721441	0.822663	0.72532	0.348383	-0.471047	-0.281627	-0.46331	0.11749	0.0148058	0.199917	0.00645008	3	3	3	3	3	3	3	3	15.3759	15.4375	14.9365	15.4814	15.7409	15.5728	17.5069	17.408	17.7906	17.1057	17.0883	17.0984	17.3892	17.3276	17.8869	17.3465	17.1826	17.2297	16.9025	17.0447	17.0971	16.6858	16.4801
Ap3s1	Q9DCR2	Q9DCR2	AP-3 complex subunit sigma-1	0	0	0	1.16685	0.743228	0.747641	0.4432	0.222623	-0.428123	-0.419583	-1.17397	0.18556	0.00288342	0.0460375	0.000581382	3	3	3	3	3	3	3	3	17.0033	16.9782	16.6369	17.0135	17.2431	17.0296	18.5712	18.4545	18.6	18.0293	18.1973	18.1147	18.4817	18.6781	18.5229	18.2842	17.8733	18.2664	17.7455	17.655	17.555	16.538	16.6219
Ap3s2	Q8BSZ2	Q8BSZ2	AP-3 complex subunit sigma-2	0	0	0	1.13101	0.680943	0.836882	0.438771	0.177617	-0.554393	-0.256903	-1.18846	0.631131	0.00624586	0.0133288	0.00018626	3	3	3	3	3	3	3	3	14.8119	14.5273	15.3024	15.0353	15.5137	14.6255	16.4269	16.3368	16.6757	15.8955	15.983	15.8977	16.8133	16.7906	16.833	16.4876	16.5048	16.6738	16.2655	16.3976	16.291	15.0067	15.2794
Ap4b1	Q9WV76	Q9WV76	AP-4 complex subunit beta-1	0	1	0	1.04372	1.07506	1.4743	1.75983	0.0617333	0.104413	0.560027	0.815437	0.09401	0.227903	9.38882e-05	0.00631469	3	3	3	3	3	3	3	3	13.6951	13.6854	13.6487	13.778	13.7427	13.6937	14.1835	14.2661	14.2463	14.3946	14.4157	14.1988	14.441	14.3992	14.5031	14.9745	15.0101	15.0387	13.6068	14.0444	13.7655	14.4459	14.6885
Ap4e1	Q80V94	Q80V94	AP-4 complex subunit epsilon-1	0	0	0	1.33461	1.22655	1.66621	1.96861	0.416417	0.294607	0.73657	0.97718	0.559393	0.124094	0.110319	0.103618	3	3	3	3	3	3	3	3	11.2711	12.382	12.8876	11.7047	12.9665	13.1188	14.1011	14.1945	13.8747	14.2833	14.5817	14.1892	13.1295	14.0157	14.1984	14.516	14.7682	14.2689	13.3269	13.1802	11.906	14.0084	13.6778
Ap4m1	Q9JKC7	Q9JKC7	AP-4 complex subunit mu-1	0	0	0	1.28933	1.79303	1.29764	1.32349	0.366617	0.842403	0.37589	0.40435	0.164691	0.0385131	0.0137639	0.0495205	3	3	3	3	3	3	3	3	15.421	15.1348	14.737	15.5383	15.5602	15.2941	16.9214	16.6884	16.0457	17.4747	17.4963	17.2117	17.2236	17.0872	16.9984	17.4059	17.6005	17.4305	16.6536	16.6514	16.5447	17.0678	17.2376
Ap4s1	Q9WVL1	Q9WVL1	AP-4 complex subunit sigma-1	0	0	0	1.12536	1.1436	1.39314	2.01961	0.170383	0.193583	0.478337	1.01408	0.463561	0.143433	0.0065966	0.00743382	3	3	3	3	3	3	3	3	14.9076	15.0946	15.3785	14.9782	15.4393	15.4742	14.8256	15.0208	15.1675	15.1984	15.1299	15.2664	15.4093	15.3678	15.6203	16.0391	15.9178	15.8754	15.4073	15.63	15.3438	16.84	16.2849
Ap5b1	Q3TAP4	Q3TAP4	AP-5 complex subunit beta-1	0	0	0	1.12738	1.10135	0.906693	1.10323	0.172977	0.139267	-0.141313	0.141737	0.177083	0.175095	0.0850548	0.418665	3	3	3	3	3	3	3	3	13.5951	13.712	13.6346	13.6204	13.9146	13.9256	14.3253	14.1873	14.2225	14.29	14.3331	14.5298	14.8791	14.9043	14.8855	14.8121	14.6251	14.8077	14.7889	14.4582	14.37	14.8629	14.6153
Ap5z1	Q3U829	Q3U829	AP-5 complex subunit zeta-1	0	0	0	1.04363	1.08903	1.0351	0.878763	0.0616167	0.123047	0.0497733	-0.186453	0.763768	0.144333	0.691821	0.0339085	3	3	3	3	3	3	3	3	14.2877	14.2835	14.2484	13.9647	14.6027	14.4369	15.2073	15.1157	15.1899	15.2592	15.4142	15.2085	15.4659	15.8125	15.7001	15.6824	15.6273	15.8181	15.403	15.3173	15.5128	15.2426	15.2387
Apaf1	O88879	O88879	Apoptotic protease-activating factor 1	0	0	0	0.959453	1.32268	1.32541	1.23079	-0.0597167	0.403463	0.406433	0.299583	0.459604	0.0266658	0.024259	0.30137	3	3	3	3	3	3	3	3	15.8199	15.7644	16.0023	15.8281	15.7843	15.7952	15.7678	15.9039	15.882	16.4721	16.1171	16.1748	15.9991	16.3237	16.085	16.6404	16.4277	16.559	16.0741	15.6028	15.431	15.6991	16.262
Apba1	B2RUJ5	B2RUJ5	Amyloid beta A4 precursor protein-binding family A member 1	0	0	0	0.960968	0.958615	1.07305	0.991889	-0.05744	-0.0609767	0.101717	-0.01175	0.832441	0.70474	0.617519	0.966151	3	3	3	3	3	3	3	3	13.8876	13.9149	13.8461	13.3223	14.1331	14.0209	16.752	16.89	17.1384	16.821	16.7226	17.0539	16.3588	16.2203	16.8268	16.5694	16.643	16.4986	15.6612	14.9461	15.0038	14.9937	15.1649
Apba3	O88888	O88888	Amyloid beta A4 precursor protein-binding family A member 3	0	0	0	NaN	NaN	NaN	NaN	NaN	NaN	NaN	NaN	NaN	NaN	NaN	NaN	0	2	0	0	0	0	0	0	NaN	NaN	NaN	9.5182	10.1465	NaN	NaN	NaN	NaN	NaN	NaN	NaN	NaN	NaN	NaN	NaN	NaN	NaN	NaN	NaN	NaN	NaN	NaN
Apbb1ip	Q8R5A3	Q8R5A3	Amyloid beta A4 precursor protein-binding family B member 1-interacting protein	0	0	0	1.03124	1.09756	0.993221	0.863204	0.0443767	0.134303	-0.00981333	-0.212227	0.590581	0.163795	0.930759	0.202654	3	3	3	3	3	3	3	3	20.2515	20.3566	20.4707	20.4839	20.3413	20.3867	21.6212	21.8515	21.6424	21.7821	21.8686	21.8672	21.765	21.8697	21.549	21.8129	21.6872	21.6542	21.1736	20.8429	20.8425	20.5874	20.7528
Apbb2	Q9DBR4	Q9DBR4	Amyloid beta A4 precursor protein-binding family B member 2	0	0	0	0.847509	1.16659	1.07409	1.53719	-0.2387	0.222303	0.10311	0.6203	0.141745	0.26493	0.041103	0.0155048	3	3	3	3	3	3	3	3	19.0722	19.1057	18.7668	18.8904	18.6661	18.672	19.4447	18.8883	19.2904	19.5071	19.429	19.3542	19.3358	19.3799	19.3483	19.5215	19.4186	19.4333	18.1263	18.212	18.0666	18.9884	18.7948
Apc	Q61315	Q61315	Adenomatous polyposis coli protein	0	0	0	1.05385	0.647218	1.87447	0.470938	0.075665	-0.627677	0.906482	-1.08639	NaN	0.215367	NaN	NaN	2	2	3	3	2	3	2	1	NaN	12.1084	12.2258	12.738	11.7475	NaN	10.9604	10.6521	11.7893	10.0137	10.8893	10.6159	12.7779	10.8292	NaN	12.7599	12.5006	12.8697	12.6318	NaN	12.9583	11.7087	NaN
Apeh	Q8R146	Q8R146	Acylamino-acid-releasing enzyme	0	0	0	0.916852	1.15688	1.08913	1.04814	-0.12524	0.21024	0.123177	0.0678267	0.137049	0.0564649	0.251055	0.669119	3	3	3	3	3	3	3	3	19.3274	19.3875	19.5388	19.3412	19.2624	19.2744	19.7682	19.5318	19.638	19.9326	19.8371	19.799	19.6664	19.7247	19.4495	19.6888	19.7099	19.8114	19.3034	19.4109	19.0041	19.1824	19.4644
Apex1	P28352	P28352	DNA-(apurinic or apyrimidinic site) lyase	0	0	0	0.977262	1.05221	0.911407	1.03631	-0.0331833	0.0734233	-0.133833	0.0514567	0.529365	0.211852	0.196742	0.375003	3	3	3	3	3	3	3	3	20.9005	20.8578	20.8047	20.8593	20.862	20.7422	21.1711	21.2183	21.1264	21.3212	21.2377	21.1771	21.5445	21.6187	21.3367	21.3876	21.3282	21.3826	20.8643	20.8548	20.8972	20.85	21.0189
Aph1a	Q8BVF7	Q8BVF7	Gamma-secretase subunit APH-1A	0	0	0	0.995581	1.29697	1.23359	1.13928	-0.00639	0.37515	0.30286	0.18812	0.94202	0.0563351	0.0148448	0.461758	3	3	3	3	3	3	3	3	16.1262	16.1386	16.1754	16.3008	16.0384	16.0818	16.9345	17.0676	16.6745	17.4111	17.2601	17.1309	17.0172	17.1145	16.8874	17.3425	17.3431	17.2421	16.2711	16.1747	16.1655	16.7257	16.4963
Api5	O35841	O35841	Apoptosis inhibitor 5	0	0	0	0.95467	1.1831	1.05411	1.08884	-0.0669267	0.24257	0.0760267	0.122797	0.214145	0.0243763	0.438491	0.359434	3	3	3	3	3	3	3	3	19.3024	19.2403	19.2127	19.2574	19.1596	19.1377	19.8456	19.9226	19.7242	20.1165	20.1048	19.9987	20.0979	20.1684	19.8773	20.1319	20.1386	20.1012	19.4602	19.4931	19.2349	19.5598	19.6443
Apip	Q9WVQ5	Q9WVQ5	Methylthioribulose-1-phosphate dehydratase	0	0	0	0.99279	1.13216	1.16308	1.06106	-0.01044	0.179073	0.217953	0.0855067	0.828726	0.216155	0.121919	0.3932	3	3	3	3	3	3	3	3	17.6617	17.6664	17.6372	17.7325	17.6109	17.5906	18.1075	17.9469	17.7149	18.1888	18.0495	18.0681	18.297	18.1608	17.9559	18.3009	18.4572	18.3095	17.8201	17.8621	17.6878	17.988	17.8981
Aplp1	Q03157	Q03157	Amyloid-like protein 1	0	0	0	1.24684	1.05601	1.01717	1.06965	0.318277	0.0786233	0.0245567	0.0971367	0.358165	0.845792	0.972834	0.834719	3	3	3	3	3	3	3	3	14.0503	13.5746	13.7776	14.5157	13.593	14.2486	15.6663	14.9535	15.9119	15.1202	15.689	15.9584	15.3666	14.578	15.984	15.7682	15.9773	14.2568	13.5921	14.3098	14.9177	14.2297	14.781
Aplp2	Q06335	Q06335	Amyloid-like protein 2	0	0	0	0.381962	1.4251	1.35116	0.471282	-1.3885	0.511063	0.434193	-1.08534	0.21689	0.04213	0.298892	0.588846	3	3	3	3	3	3	3	3	17.1632	14.2173	14.5039	13.7032	13.8441	14.1716	15.5391	15.8776	16.0108	16.2197	16.217	16.5239	15.5833	15.2737	16.2223	15.6762	16.4574	16.2482	14.4896	20.4599	15.4628	15.7459	15.6705
Apmap	Q9D7N9	Q9D7N9	Adipocyte plasma membrane-associated protein	0	0	0	1.01686	0.941957	1.18479	1.38463	0.0241167	-0.0862667	0.244637	0.469497	0.629322	0.423194	0.00308822	0.000326015	3	3	3	3	3	3	3	3	18.1768	18.1315	18.0478	18.1929	18.1335	18.1021	19.2522	19.1918	19.4715	19.2394	19.1304	19.2869	19.4428	19.4396	19.4306	19.7143	19.7263	19.6064	18.9555	19.0648	19.0006	19.5179	19.4294
Apoa1	Q00623	Q00623	Apolipoprotein A-I	0	0	0	0.945024	0.915971	0.558435	0.677289	-0.0815767	-0.126627	-0.84054	-0.562157	0.842822	0.778882	0.0870576	0.286659	3	3	3	3	3	3	3	3	19.0147	18.4472	18.0765	18.1536	18.9764	18.1637	20.592	19.6557	19.3095	19.3843	19.9714	19.8217	20.6609	19.4057	20.2164	19.1343	19.2881	19.3389	19.1237	20.2744	18.8968	19.1786	18.6093
Apobec2	Q9WV35	Q9WV35	C->U-editing enzyme APOBEC-2	0	0	0	NaN	0.984457	0.917961	NaN	NaN	-0.0226	-0.123495	NaN	NaN	NaN	NaN	NaN	0	0	3	2	3	2	2	0	NaN	NaN	NaN	NaN	NaN	NaN	13.9212	16.8262	16.8279	16.1081	15.5635	NaN	16.3742	16.2389	16.4851	NaN	15.8612	16.624	13.5751	NaN	15.5882	NaN	NaN
Apobec3	Q99J72	Q99J72	DNA dC->dU-editing enzyme APOBEC-3	0	0	0	1.56843	3.92145	2.09812	1.69086	0.649317	1.97139	1.0691	0.757753	NaN	0.147738	0.00848143	0.0081898	2	3	3	3	3	3	3	3	12.5191	11.6901	NaN	12.6802	13.0335	12.548	14.7317	13.382	10.9911	14.855	15.2503	14.9137	14.9732	14.7945	14.4463	16.0545	15.855	15.5117	14.7346	15.0864	14.909	15.4653	15.665
Apobr	Q8VBT6	Q8VBT6	Apolipoprotein B receptor	0	0	0	0.953078	1.17563	1.15274	0.898601	-0.0693333	0.23343	0.20507	-0.154247	0.123104	0.162307	0.0888506	0.0963783	3	3	3	3	3	3	3	3	17.0867	17.04	17.0207	16.9957	17.0214	16.9223	17.8981	18.287	17.8736	18.3014	18.2108	18.2467	18.6536	18.6299	18.3922	18.8292	18.7634	18.6982	18.1296	18.1146	17.9232	17.9482	17.8972
Apod	P51910	P51910	Apolipoprotein D	0	1	0	1.11854	1.17254	2.66844	6.00565	0.161613	0.229633	1.416	2.58632	0.790372	0.276413	0.0089859	7.77199e-05	3	3	3	3	3	3	3	3	14.5495	13.3036	15.2433	14.5534	14.5748	14.4531	16.254	15.9612	16.4524	16.4869	16.2404	16.6293	16.0192	15.9916	16.4078	17.4231	18.0684	17.175	15.9579	15.8333	16.1222	18.8209	18.4321
Apoe	P08226	P08226	Apolipoprotein E	1	0	0	1.00753	2.44162	4.20493	9.25004	0.0108167	1.28784	2.07208	3.20946	0.859418	0.0245102	0.00447434	4.37383e-05	3	3	3	3	3	3	3	3	19.117	19.1706	19.1159	19.2533	19.0804	19.1022	19.9654	20.0706	20.08	20.7595	22.0063	21.2137	20.0372	19.9824	20.0406	22.11	22.7041	21.4625	19.6816	19.7309	19.3261	22.7775	22.9826
Apoh	Q01339	Q01339	Beta-2-glycoprotein 1	0	0	0	0.368459	1.05614	0.430484	0.316563	-1.44042	0.0787967	-1.21597	-1.65944	0.277446	0.831321	NaN	NaN	3	3	3	3	3	1	3	1	13.142	13.9302	13.4248	9.85114	13.5244	12.8002	13.7853	14.3854	13.2416	14.0466	13.9153	13.6869	14.4363	14.62	13.6221	13.0102	NaN	NaN	13.862	13.2553	11.1478	NaN	NaN
Apoo	Q9DCZ4	Q9DCZ4	MICOS complex subunit Mic26	0	0	0	1.11678	0.453214	0.721383	1.04565	0.159347	-1.14174	-0.471163	0.0643967	0.0952702	0.0033374	0.270828	0.6916	3	3	3	3	3	3	3	3	17.7805	17.9176	17.9271	17.9249	18.1088	18.0695	20.3447	20.1819	20.74	19.4275	19.1689	19.245	20.0559	19.5393	20.7498	19.7989	19.7136	19.419	19.2703	19.1018	19.6073	19.3382	19.4135
Apool	Q78IK4	Q78IK4	MICOS complex subunit Mic27	0	0	0	0.920738	0.901196	0.943898	0.790337	-0.119137	-0.150087	-0.0832967	-0.33946	0.289376	0.0426949	0.207287	0.0187381	3	3	3	3	3	3	3	3	17.4059	17.4618	17.2122	17.1207	17.3257	17.2761	18.6213	18.6573	18.702	18.4694	18.4599	18.601	18.813	18.6974	18.8129	18.6603	18.7702	18.6428	18.0092	17.9032	17.8145	17.4994	17.5022
App	P12023	P12023	Amyloid beta A4 protein	0	0	0	3.64863	6.0014	3.65208	3.30698	1.86735	2.5853	1.86872	1.72551	1.12547e-05	3.70829e-05	0.00089003	8.96196e-05	3	3	3	3	3	3	3	3	15.7218	15.7203	15.5415	17.5499	17.4604	17.5753	16.8028	17.1165	17.236	19.6537	19.6275	19.63	17.4285	17.2239	17.5923	19.4073	19.5175	18.9261	16.9343	16.8337	17.0419	18.7644	18.4834
Appl1	Q8K3H0	Q8K3H0	DCC-interacting protein 13-alpha	0	0	0	1.02634	0.881079	0.777322	0.735748	0.03751	-0.182657	-0.363417	-0.442717	0.675721	0.0246733	0.00809824	0.0394106	3	3	3	3	3	3	3	3	16.9117	16.8564	16.8843	17.0599	16.777	16.9281	18.732	18.6898	18.8612	18.565	18.5813	18.5887	18.5476	18.6378	18.7544	18.2039	18.2896	18.356	17.6166	17.9341	17.979	17.5743	17.2582
Appl2	Q8K3G9	Q8K3G9	DCC-interacting protein 13-beta	0	0	0	0.895437	0.976501	0.960253	1.03323	-0.159337	-0.0343067	-0.0585133	0.0471567	0.0241938	0.593662	0.589186	0.742302	3	3	3	3	3	3	3	3	16.4362	16.4745	16.505	16.2396	16.3186	16.3794	17.5094	17.4148	17.6154	17.4964	17.4549	17.4853	17.6436	17.7498	17.8992	17.5819	17.7241	17.8111	17.4357	17.6764	17.3996	17.7045	17.3585
APPsw	P05067	P05067	Amyloid beta A4 protein swe	0	0	0	NaN	NaN	NaN	NaN	NaN	NaN	NaN	NaN	NaN	NaN	NaN	NaN	0	3	0	3	0	3	0	3	NaN	NaN	NaN	17.3421	17.1501	17.2641	NaN	NaN	NaN	18.3692	18.0054	17.6508	NaN	NaN	NaN	17.5017	17.5455	17.5584	NaN	NaN	NaN	17.89	18.3069
Aprt	P08030	P08030	Adenine phosphoribosyltransferase	0	0	0	0.943648	1.21634	1.36778	1.31301	-0.08368	0.282547	0.45184	0.392877	0.280057	0.00272571	0.038304	0.00512063	3	3	3	3	3	3	3	3	17.8499	17.749	17.9661	17.8148	17.7659	17.7332	18.3748	18.2835	18.2781	18.5946	18.5444	18.6451	18.6583	18.5636	18.213	19.0276	18.9448	18.8179	18.6253	18.6275	18.4434	19.0104	18.9743
Aqp1	Q02013	Q02013	Aquaporin-1	0	0	0	NaN	0.947134	NaN	NaN	NaN	-0.07836	NaN	NaN	NaN	NaN	NaN	NaN	0	2	1	1	0	1	0	2	NaN	NaN	NaN	NaN	15.1221	14.6756	NaN	NaN	14.8669	14.7885	NaN	NaN	NaN	NaN	NaN	NaN	NaN	15.5815	NaN	NaN	NaN	NaN	14.6122
Aqp4	P55088	P55088	Aquaporin-4	0	0	0	1.63409	0.251192	0.581246	1.33813	0.708483	-1.99314	-0.782778	0.420213	0.0722079	0.0073471	NaN	0.709683	3	3	3	3	3	2	3	3	12.6083	12.8192	12.0559	13.5658	13.0602	12.9828	16.7077	16.2794	16.3279	15.1695	14.2346	13.9314	16.5917	16.531	16.7976	15.7391	15.9756	NaN	16.9606	13.7508	13.8715	15.2449	15.3437
Aqr	Q8CFQ3	Q8CFQ3	Intron-binding protein aquarius	0	0	0	1.08736	1.38578	1.20159	1.20642	0.120823	0.470693	0.264943	0.270733	0.529039	0.00272923	0.237113	0.105395	3	3	3	3	3	3	3	3	16.7371	16.7128	16.4959	17.0733	16.6917	16.5433	16.8188	16.9764	16.8096	17.3399	17.258	17.4189	17.3167	17.4244	16.904	17.569	17.6019	17.269	16.8306	17.0513	16.6841	16.9825	17.2288
Araf	P04627	P04627	Serine/threonine-protein kinase A-Raf	0	0	0	0.941002	0.863964	0.964933	0.805951	-0.08773	-0.210957	-0.0515	-0.311237	0.272358	0.0561231	0.208035	0.107843	3	3	3	3	3	3	3	3	16.5652	16.4885	16.3609	16.3147	16.4121	16.4246	17.5819	17.4826	17.6738	17.282	17.3481	17.4754	17.849	17.8327	17.9412	17.8316	17.8109	17.8259	17.3273	17.4994	17.7752	17.3665	17.1109
Arap1	Q4LDD4	Q4LDD4	Arf-GAP with Rho-GAP domain, ANK repeat and PH domain-containing protein 1	0	0	0	0.947101	1.18828	0.945114	0.999145	-0.07841	0.248873	-0.08144	-0.00123333	0.121934	0.0151607	0.412546	0.978248	3	3	3	3	3	3	3	3	18.0667	18.0622	18.1336	18.0738	17.9682	17.9853	18.5404	18.7317	18.6047	18.8519	18.9223	18.8492	18.9836	19.2501	19.0295	18.9529	19.0703	18.9957	18.7282	18.5854	18.6504	18.6349	18.6701
Arap3	Q8R5G7	Q8R5G7	Arf-GAP with Rho-GAP domain, ANK repeat and PH domain-containing protein 3	0	0	0	1.2225	1.34844	0.843385	0.720212	0.289837	0.43129	-0.245737	-0.473507	0.124428	0.00806646	0.15445	0.0241462	3	3	3	3	3	3	3	3	15.6426	15.4021	15.3009	15.9483	15.6894	15.5775	16.4285	16.5501	16.4715	16.7648	17.0408	16.9383	17.0579	17.2413	17.203	16.8864	16.7187	17.1598	16.835	16.6863	16.7218	16.523	16.1127
Arcn1	Q5XJY5	Q5XJY5	Coatomer subunit delta	0	0	0	0.904114	1.25655	1.36849	1.50715	-0.145423	0.329463	0.452587	0.59182	0.0517779	0.00272659	0.00870329	0.000164109	3	3	3	3	3	3	3	3	19.3754	19.531	19.5289	19.3283	19.3139	19.3568	20.3012	20.3736	20.2699	20.7086	20.6517	20.5728	20.447	20.4888	20.2801	20.9912	20.8264	20.756	20.0093	19.9466	19.8888	20.5079	20.5906
Arf1	P84078	P84078	ADP-ribosylation factor 1	0	0	0	0.921581	1.00878	1.0399	1.01795	-0.117817	0.01261	0.0564433	0.02566	0.09015	0.815998	0.152338	0.608806	3	3	3	3	3	3	3	3	22.5244	22.4691	22.6321	22.4475	22.3787	22.4459	23.2816	23.4142	23.4342	23.3786	23.4223	23.3669	23.3868	23.3899	23.2941	23.4251	23.4079	23.407	22.9051	22.7541	22.8517	22.8558	22.889
Arf2	Q8BSL7	Q8BSL7	ADP-ribosylation factor 2	0	0	0	1.18918	1.06539	0.844024	0.69425	0.24997	0.09138	-0.244643	-0.526473	0.253602	0.734426	0.167379	0.0235945	3	3	3	3	3	3	3	3	15.7973	15.5386	15.7529	16.238	15.9508	15.6499	17.4042	17.0304	16.9259	17.6189	17.0479	16.9679	17.2697	17.0866	16.9408	16.6594	16.8647	17.039	16.6466	16.517	16.1802	15.861	15.8816
Arf3	P61205	P61205	ADP-ribosylation factor 3	0	0	0	0.922382	1.33175	1.15222	1.13952	-0.116563	0.413323	0.20441	0.188423	0.719005	0.720604	0.736055	0.607267	3	3	3	3	3	3	3	3	14.8517	14.4899	15.429	14.597	15.0379	14.7861	12.3215	15.1164	15.3479	15.3453	13.7889	14.8915	14.6637	15.4654	15.9766	14.9024	15.479	16.3375	13.996	14.066	14.8664	14.1273	14.764
Arf4	P61750	P61750	ADP-ribosylation factor 4	0	0	0	1.00373	1.16172	1.06723	1.02426	0.00536667	0.216263	0.09387	0.0345867	0.96105	0.0115962	0.481122	0.908114	3	3	3	3	3	3	3	3	19.4305	19.4644	19.6693	19.6687	19.4698	19.4418	20.5185	20.3639	20.4011	20.6516	20.6661	20.6146	20.4874	20.5731	20.1857	20.5583	20.4584	20.5111	19.6507	19.5301	19.1996	19.0448	19.8964
Arf5	P84084	P84084	ADP-ribosylation factor 5	0	0	0	0.896656	0.973116	1.12011	1.10069	-0.157373	-0.0393167	0.16364	0.138407	0.0830901	0.695596	0.0926895	0.11083	3	3	3	3	3	3	3	3	19.2911	19.3243	19.4579	19.109	19.2446	19.2476	20.292	20.3638	20.5663	20.3269	20.4573	20.32	20.2427	20.2956	20.2044	20.5195	20.4326	20.2815	19.3288	19.3395	19.5172	19.4755	19.5713
Arf6	P62331	P62331	ADP-ribosylation factor 6	0	0	0	0.938635	0.935278	0.87299	0.90776	-0.0913633	-0.0965333	-0.195963	-0.139617	0.328038	0.0327577	0.0340893	0.0279478	3	3	3	3	3	3	3	3	17.9613	17.7707	17.8447	17.8742	17.7637	17.6647	18.392	18.4196	18.3266	18.2827	18.3039	18.262	18.5627	18.5259	18.4828	18.401	18.2144	18.3681	17.9829	17.8699	17.9666	17.8242	17.7569
Arfgap1	Q9EPJ9	Q9EPJ9	ADP-ribosylation factor GTPase-activating protein 1	0	0	0	0.873462	0.883705	0.904741	0.975978	-0.195183	-0.178363	-0.144423	-0.03508	0.0450674	0.0188869	0.20318	0.622714	3	3	3	3	3	3	3	3	16.0202	16.1384	16.2355	15.8972	15.9877	15.9236	16.6685	16.5538	16.7085	16.4602	16.4581	16.4774	16.5514	16.4507	16.6456	16.5274	16.423	16.2641	16.3654	16.2797	16.2913	16.1595	16.3134
Arfgap2	Q99K28	Q99K28	ADP-ribosylation factor GTPase-activating protein 2	0	0	0	1.02231	1.09035	1.17782	1.44718	0.0318333	0.124787	0.236123	0.533247	0.299793	0.00689025	0.0655637	0.00386023	3	3	3	3	3	3	3	3	16.2932	16.2807	16.2759	16.3663	16.2995	16.2794	16.7868	16.8149	16.7691	16.8889	16.901	16.9553	16.9728	17.1381	16.9555	17.3357	17.3279	17.1111	16.6066	16.6219	16.4676	16.9547	17.1415
Arfgap3	Q9D8S3	Q9D8S3	ADP-ribosylation factor GTPase-activating protein 3	0	0	0	1.04432	1.05801	1.35462	0.957548	0.06257	0.08135	0.437887	-0.0625833	0.70218	0.696726	0.00108366	0.701023	3	3	3	3	3	3	3	3	13.4577	13.5107	13.5385	13.2728	13.7731	13.6487	14.6522	14.6148	14.7234	14.7049	15.0946	14.4348	14.8958	14.8936	14.7924	15.3256	15.3485	15.2213	14.8244	14.9392	14.4982	14.8272	14.5705
Arfgef1	G3X9K3	G3X9K3	Brefeldin A-inhibited guanine nucleotide-exchange protein 1	0	0	0	1.09575	0.95635	1.30952	1.15758	0.131917	-0.06439	0.389033	0.211113	0.0948778	0.446315	0.000850495	0.08532	3	3	3	3	3	3	3	3	16.7153	16.5631	16.6578	16.8575	16.721	16.7534	17.3641	17.3985	17.5492	17.4515	17.2775	17.3896	17.5249	17.594	17.6542	17.9387	18.0134	17.9881	16.9772	17.1809	16.9858	17.3771	17.154
Arfgef2	A2A5R2	A2A5R2	Brefeldin A-inhibited guanine nucleotide-exchange protein 2	0	0	0	1.08775	0.899451	1.29335	1.21709	0.121347	-0.152883	0.371117	0.283437	0.552881	0.0883176	0.0113927	0.00194704	3	3	3	3	3	3	3	3	15.3277	15.0994	15.5302	15.716	15.3488	15.2565	16.8537	16.9612	17.0728	16.8386	16.7591	16.8314	16.7449	16.6538	16.9216	17.1718	17.1748	17.0871	16.7673	16.8188	16.7349	17.1164	17.0137
Arfgef3	Q3UGY8	Q3UGY8	Brefeldin A-inhibited guanine nucleotide-exchange protein 3	0	0	0	NaN	9.23142	9.76688	4.12642	NaN	3.20655	3.2879	2.04489	NaN	0.0112399	NaN	0.0432363	1	0	3	3	2	3	3	3	NaN	13.9056	NaN	NaN	NaN	NaN	12.2738	13.8382	14.7175	16.6738	16.7886	16.9869	10.7436	NaN	14.9071	16.1547	16.5236	15.6614	13.0124	14.4528	12.1467	15.4683	14.8599
Arfip2	Q8K221	Q8K221	Arfaptin-2	0	0	0	0.955011	0.724202	1.11004	1.44415	-0.06641	-0.465537	0.150617	0.53022	0.929447	0.0378203	0.80195	0.30625	3	3	3	3	3	3	3	3	13.8863	13.9905	13.0946	14.3138	12.3032	14.1551	15.8953	15.8483	16.3268	15.5647	15.5478	15.5613	15.3725	14.7998	16.6172	15.8599	15.9639	15.4176	14.5509	14.3468	15.4028	15.0263	14.9371
Arfrp1	Q8BXL7	Q8BXL7	ADP-ribosylation factor-related protein 1	0	0	0	0.962963	1.19201	1.6446	1.37994	-0.0544483	0.253393	0.71774	0.46461	NaN	0.256706	0.0174521	0.143868	2	3	3	3	3	3	3	3	NaN	14.1975	13.5402	14.0793	13.5127	13.8512	14.4429	14.3701	14.4325	14.8833	14.8334	14.289	14.7457	14.5275	14.3768	15.5023	15.3105	14.9904	14.4184	14.4434	14.055	14.8805	14.3404
Arg1	Q61176	Q61176	Arginase-1	0	0	0	0.756315	NaN	NaN	NaN	-0.40294	NaN	NaN	NaN	0.064364	NaN	NaN	NaN	3	3	0	0	1	0	1	0	14.6755	14.6781	14.9555	14.3836	14.5813	14.1354	NaN	0.0900313	NaN	NaN	NaN	NaN	0.413436	NaN	9.19894	NaN	NaN	NaN	14.7483	NaN	NaN	NaN	NaN
Arglu1	Q3UL36	Q3UL36	Arginine and glutamate-rich protein 1	0	0	0	0.760679	1.15184	0.995601	1.38581	-0.39464	0.203937	-0.00636	0.470727	0.151604	0.160338	0.963908	0.0106445	3	3	3	3	3	3	3	3	16.0363	16.2791	16.1879	15.3604	15.899	16.06	17.0243	17.2514	17.0205	17.1378	17.4503	17.3199	17.2832	17.3668	17.188	17.5068	17.0982	17.214	16.1896	16.4757	16.5063	16.8778	16.8106
Arhgap1	Q5FWK3	Q5FWK3	Rho GTPase-activating protein 1	0	0	0	1.04628	0.874102	1.02759	1.33092	0.0652667	-0.194127	0.0392633	0.412423	0.560247	0.0523085	0.696043	0.0273358	3	3	3	3	3	3	3	3	19.3765	19.4125	19.5753	19.685	19.4266	19.4485	20.7593	20.7094	20.8672	20.6571	20.4798	20.6166	20.7005	20.7397	20.9821	20.8465	20.901	20.7926	20.0707	19.8741	19.9728	20.3463	20.5871
Arhgap12	Q8C0D4	Q8C0D4	Rho GTPase-activating protein 12	0	-1	0	0.997669	0.929225	0.685913	0.440183	-0.00336667	-0.1059	-0.543903	-1.18382	0.949343	0.132553	0.0151266	0.000401598	3	3	3	3	3	3	3	3	16.2947	16.2989	16.3833	16.4027	16.2911	16.2729	17.3413	17.3056	17.1935	17.167	17.2369	17.1188	17.6835	17.7968	17.3535	17.0709	17.0475	17.0836	17.2988	17.2341	17.052	16.0857	16.0956
Arhgap17	Q3UIA2	Q3UIA2	Rho GTPase-activating protein 17	0	0	0	0.966867	0.946101	1.16647	1.2823	-0.04861	-0.0799333	0.222147	0.358733	0.361071	0.418076	0.0903683	0.0008738	3	3	3	3	3	3	3	3	19.5189	19.4766	19.5345	19.549	19.4228	19.4124	20.3719	20.1841	20.2499	20.3188	20.0813	20.166	20.7263	20.4145	20.6351	20.8135	20.749	20.8798	20.118	20.0964	20.1887	20.4631	20.4652
Arhgap18	Q8K0Q5	Q8K0Q5	Rho GTPase-activating protein 18	0	0	0	1.00365	0.981396	0.872978	0.643062	0.00525	-0.0270933	-0.195983	-0.63697	0.804607	0.745978	0.0353318	0.000432042	3	3	3	3	3	3	3	3	15.8133	15.8216	15.8614	15.8522	15.811	15.8487	15.524	15.3473	15.4424	15.4184	15.509	15.305	15.8385	15.9898	15.8636	15.696	15.6318	15.776	14.9272	15.0446	15.0869	14.3161	14.3942
Arhgap22	Q8BL80	Q8BL80	Rho GTPase-activating protein 22	0	0	-1	0.965042	0.990531	0.827559	0.591745	-0.0513367	-0.0137267	-0.273067	-0.756953	0.410005	0.788519	0.126888	0.000328262	3	3	3	3	3	3	3	3	17.0369	16.9982	17.0415	17.0669	16.8794	16.9764	18.3853	18.3992	18.3276	18.2727	18.3889	18.4094	18.7217	18.8048	18.4287	18.2962	18.2919	18.5479	18.5591	18.6081	18.4053	17.7313	17.8146
Arhgap24	Q8C4V1	Q8C4V1	Rho GTPase-activating protein 24	0	0	0	NaN	NaN	NaN	NaN	NaN	NaN	NaN	NaN	NaN	NaN	NaN	NaN	0	0	0	1	0	3	0	3	NaN	NaN	NaN	NaN	NaN	NaN	NaN	NaN	NaN	NaN	NaN	15.0461	NaN	NaN	NaN	15.2956	15.1209	14.8413	NaN	NaN	NaN	15.8487	15.9666
Arhgap25	Q8BYW1	Q8BYW1	Rho GTPase-activating protein 25	0	0	0	0.978771	1.30718	1.42285	1.44805	-0.0309567	0.386453	0.50878	0.534107	0.286605	0.00214555	0.00253046	0.00299029	3	3	3	3	3	3	3	3	18.9145	18.8671	18.8889	18.8951	18.8219	18.8607	19.6076	19.7126	19.5421	20.0414	20.0179	19.9624	19.7869	19.8297	19.6289	20.333	20.2597	20.1791	19.5721	19.5621	19.5608	20.253	19.969
Arhgap27	A2AB59	A2AB59	Rho GTPase-activating protein 27	0	0	0	0.974545	1.03878	0.945612	0.815232	-0.0372	0.0548933	-0.08068	-0.294717	0.540165	0.261985	0.321721	0.0023748	3	3	3	3	3	3	3	3	19.2724	19.3108	19.2346	19.3361	19.1998	19.1703	20.1379	20.2379	20.1428	20.179	20.2332	20.2709	20.3877	20.5044	20.3104	20.2534	20.3043	20.4027	20.1322	20.2058	20.1948	19.884	19.8193
Arhgap30	Q640N3	Q640N3	Rho GTPase-activating protein 30	0	0	-1	1.02118	1.10675	0.759187	0.630326	0.0302433	0.14633	-0.397473	-0.66583	0.565506	0.185786	0.0184787	0.00294865	3	3	3	3	3	3	3	3	16.9681	17.0132	16.9653	17.102	16.951	16.9844	17.8496	18.0963	17.8166	18.0309	18.1149	18.0557	18.3384	18.4319	18.2611	17.9404	17.7917	18.1068	17.8476	17.6579	17.7208	17.2486	17.0044
Arhgap31	A6X8Z5	A6X8Z5	Rho GTPase-activating protein 31	0	0	-1	1.00683	0.952572	0.844752	0.638449	0.00981667	-0.0701	-0.2434	-0.647357	0.8872	0.18593	0.0063433	0.00914226	3	3	3	3	3	3	3	3	15.9999	16.2014	16.0693	16.0461	16.1277	16.1262	17.2164	17.259	17.265	17.123	17.2577	17.1495	17.6143	17.6036	17.5537	17.3232	17.2884	17.4298	17.2893	17.3966	17.3605	16.7811	16.4412
Arhgap35	Q91YM2	Q91YM2	Rho GTPase-activating protein 35	0	0	0	1.2195	0.769353	1.07986	1.18301	0.286287	-0.378283	0.110843	0.242463	0.127495	0.0364367	0.782262	0.215186	3	3	3	3	3	3	3	3	11.4886	11.6186	11.8934	12.1321	11.8553	11.8721	14.949	14.8681	15.2124	14.5036	14.6833	14.7078	14.6088	14.2048	15.4168	15.0427	14.8804	14.6399	14.0888	14.2302	14.3364	14.502	14.1858
Arhgap44	Q5SSM3	Q5SSM3	Rho GTPase-activating protein 44	0	0	0	0.235075	0.660526	0.624675	0.365844	-2.08881	-0.598313	-0.678823	-1.4507	0.0878869	0.0829745	0.113205	0.291833	3	3	3	3	3	3	3	3	15.1029	15.0722	14.9079	12.1465	14.7874	11.8827	15.8078	15.5154	16.1322	15.4927	14.8555	15.3123	15.124	15.7143	16.111	14.801	14.7919	15.32	15.9475	12.279	14.2853	13.0198	11.6487
Arhgap5	P97393	P97393	Rho GTPase-activating protein 5	0	0	0	0.986449	1.01522	1.03252	0.804118	-0.0196833	0.0217867	0.04617	-0.31452	0.8651	0.63361	0.536633	0.00952451	3	3	3	3	3	3	3	3	17.4234	17.1823	17.4188	17.4626	17.212	17.2909	18.2576	18.2094	18.2891	18.2039	18.2992	18.3183	18.3249	18.4264	18.25	18.3976	18.2939	18.4483	18.0809	18.1731	18.1509	17.9085	17.7024
Arhgdia	Q99PT1	Q99PT1	Rho GDP-dissociation inhibitor 1	0	0	0	0.943327	1.1602	0.948634	0.689929	-0.08417	0.21437	-0.0760767	-0.53548	0.199092	0.0313504	0.72932	0.0243963	3	3	3	3	3	3	3	3	24.1541	24.0395	24.1461	24.1099	23.9909	23.9864	23.8173	24.0035	23.9191	24.2037	24.0862	24.0931	24.2365	24.4481	23.8071	24.0118	24.0033	24.2484	23.8448	23.8388	23.5801	23.4405	23.2069
Arhgdib	Q61599	Q61599	Rho GDP-dissociation inhibitor 2	0	0	-1	0.953581	1.01944	0.912506	0.698484	-0.0685733	0.0277767	-0.132093	-0.5177	0.673031	0.640826	0.340653	0.0171377	3	3	3	3	3	3	3	3	20.8377	20.8359	21.1176	21.0982	20.7548	20.7326	21.8089	21.7643	21.665	21.7049	21.8192	21.7975	21.8233	21.8316	21.4682	21.6189	21.5341	21.5738	21.0134	21.0047	20.9817	20.6662	20.553
Arhgef1	Q61210	Q61210	Rho guanine nucleotide exchange factor 1	0	0	0	0.851035	1.14544	0.922958	0.836994	-0.23271	0.1959	-0.115663	-0.25671	0.265082	0.0445389	0.168457	0.0164504	3	3	3	3	3	3	3	3	18.775	18.8124	18.844	18.7961	18.2237	18.7135	19.5204	19.6953	19.6035	19.793	19.8848	19.7291	19.7658	19.9068	19.6993	19.7043	19.6117	19.7088	19.2624	19.149	19.0461	18.9192	18.8644
Arhgef10l	A2AWP8	A2AWP8	Rho guanine nucleotide exchange factor 10-like protein	0	0	0	1.02097	0.906666	0.585175	0.391556	0.0299367	-0.141357	-0.77306	-1.35271	0.844805	0.674304	0.000285674	0.00107363	3	3	3	3	3	3	3	3	13.9898	14.0239	14.2876	14.2652	14.2094	13.9164	14.963	14.7291	14.0176	14.1791	14.4941	14.6124	15.0089	14.9494	14.9984	14.2394	14.3045	14.0937	14.8172	14.6439	14.3886	13.1739	13.1529
Arhgef12	Q8R4H2	Q8R4H2	Rho guanine nucleotide exchange factor 12	0	0	0	1.05689	0.731867	0.725988	0.834868	0.0798267	-0.450347	-0.461983	-0.26038	0.737903	0.0485041	0.00248534	0.0811602	3	3	3	3	3	3	3	3	13.5023	13.6021	13.5156	13.1793	13.844	13.8362	15.1213	15.5826	15.5057	14.8063	15.0174	15.0348	15.8972	15.9306	15.8691	15.407	15.3408	15.5631	14.9467	15.1168	14.9867	14.8884	14.5607
Arhgef18	Q6P9R4	Q6P9R4	Rho guanine nucleotide exchange factor 18	0	0	0	1.02498	0.958504	1.01468	0.530442	0.0355967	-0.0611433	0.02103	-0.914733	0.856737	0.889349	0.872966	0.0136295	3	3	3	3	3	3	3	3	13.2106	13.5562	12.9964	13.176	13.4613	13.2326	15.6193	15.3303	15.0092	14.5619	15.8381	15.3754	15.3166	15.5175	15.5689	15.3228	15.657	15.4862	14.6133	14.0103	14.4573	13.419	13.6672
Arhgef2	Q60875	Q60875	Rho guanine nucleotide exchange factor 2	0	0	0	1.01536	0.892679	0.789195	0.641329	0.0219967	-0.163787	-0.341547	-0.640863	0.750222	0.279759	0.0288847	1.07385e-05	3	3	3	3	3	3	3	3	17.2353	17.2492	17.3302	17.4053	17.2157	17.2596	18.245	18.1153	18.0842	17.9118	18.2216	17.8198	18.2332	18.3621	18.2536	18.053	17.7542	18.017	17.8413	17.8013	17.8378	17.1997	17.1471
Arhgef40	Q3UPH7	Q3UPH7	Rho guanine nucleotide exchange factor 40	0	0	0	1.22137	1.22221	0.833268	0.61727	0.288497	0.289487	-0.263147	-0.696027	0.192225	0.0513923	0.10098	0.000531584	3	3	3	3	3	3	3	3	14.3531	14.5355	13.9206	14.5178	14.6056	14.5512	15.3778	15.3233	15.0829	15.4693	15.652	15.5311	16.0803	16.0893	16.006	15.6788	15.6699	16.0376	15.7587	15.7599	15.5684	15.0058	14.9525
Arhgef6	Q8K4I3	Q8K4I3	Rho guanine nucleotide exchange factor 6	0	0	0	1.05157	1.2404	1.02019	0.859443	0.0725433	0.3108	0.0288367	-0.218527	0.192196	0.00274858	0.79034	0.00456704	3	3	3	3	3	3	3	3	19.7152	19.8044	19.7257	19.8931	19.7968	19.7728	20.421	20.5258	20.4441	20.7274	20.8425	20.7533	21.1638	21.2026	20.9097	21.1727	21.1546	21.0353	20.8321	20.9441	20.8331	20.6403	20.6462
Arhgef7	Q9ES28	Q9ES28	Rho guanine nucleotide exchange factor 7	0	0	0	1.0314	1.43971	1.86152	1.34587	0.0446067	0.525773	0.89648	0.42854	0.56885	0.0109931	0.000809464	0.067581	3	3	3	3	3	3	3	3	16.8939	17.0898	17.106	17.1182	17.0403	17.065	17.9825	17.8237	18.0053	18.5462	18.5836	18.259	18.3087	18.3829	18.2073	19.3163	19.2387	19.0334	17.4046	17.4956	17.3525	17.9203	18.0911
Arid1a	A2BH40	A2BH40	AT-rich interactive domain-containing protein 1A	0	0	0	1.22499	1.10583	0.913994	0.729623	0.292773	0.14513	-0.129743	-0.454777	0.031414	0.0430614	0.360491	0.0485208	3	3	3	3	3	3	3	3	15.7537	15.773	15.9571	16.0427	16.2445	16.0748	17.0516	16.9591	16.8985	17.1573	17.1031	17.0841	16.9382	17.0492	16.6673	16.7958	16.8221	16.6476	16.773	16.6014	16.4543	16.2297	16.3391
Arid3a	Q62431	Q62431	AT-rich interactive domain-containing protein 3A	0	0	0	1.66786	0.659551	0.970372	1.51589	0.737997	-0.600443	-0.04339	0.600163	NaN	0.0477749	0.931911	0.203282	2	3	3	3	3	3	3	3	14.307	NaN	11.5131	14.8018	11.8262	14.3163	15.3187	15.8106	15.8944	14.9621	14.9577	15.3026	14.472	14.3934	14.6675	14.2948	13.7536	15.3543	14.5099	14.3725	14.4978	15.8448	14.6436
Arih1	Q9Z1K5	Q9Z1K5	E3 ubiquitin-protein ligase ARIH1	0	0	0	1.00773	1.11751	1.01448	0.937422	0.01111	0.160283	0.0207333	-0.09323	0.91913	0.133096	0.819461	0.364709	3	3	3	3	3	3	3	3	17.8476	17.8974	17.5672	17.7822	17.7796	17.7838	18.3356	18.5629	18.4066	18.5258	18.6982	18.5619	18.8057	18.9579	18.6759	18.8779	18.8304	18.7934	18.5245	18.4639	18.234	18.2778	18.31
Arih2	Q9Z1K6	Q9Z1K6	E3 ubiquitin-protein ligase ARIH2	0	0	0	0.90654	1.15318	1.11683	1.05403	-0.141557	0.205613	0.15941	0.07591	0.263034	0.0351837	0.105557	0.0887542	3	3	3	3	3	3	3	3	16.0383	15.9003	15.9625	16.0087	15.6595	15.8081	16.3885	16.358	16.3248	16.6592	16.5848	16.4441	16.596	16.7161	16.4683	16.7605	16.7026	16.7955	15.9635	15.9142	15.9569	16.076	16.0143
Arl1	P61211	P61211	ADP-ribosylation factor-like protein 1	0	0	0	0.974022	1.14756	1.13774	1.38072	-0.0379733	0.198567	0.18617	0.46542	0.460812	0.0157845	0.168588	0.00846371	3	3	3	3	3	3	3	3	17.8409	17.7531	17.8715	17.8431	17.744	17.7645	18.1179	18.278	18.1581	18.3807	18.3657	18.4033	18.5416	18.4839	18.3262	18.7034	18.7489	18.4579	17.7978	17.7928	17.6958	18.3846	18.2267
Arl10	Q9QXJ4	Q9QXJ4	ADP-ribosylation factor-like protein 10	0	0	0	1.164	0.872685	0.66232	0.966832	0.219093	-0.196467	-0.5944	-0.0486633	0.569805	0.453726	0.185246	0.814657	3	3	3	3	3	3	3	3	15.449	15.4635	14.4349	15.1451	15.4727	15.3869	16.3047	15.9509	15.8075	15.9054	15.4709	16.0974	16.6841	16.6209	16.3487	16.2344	16.3885	15.2476	15.3653	15.8695	15.3576	15.3572	15.6695
Arl11	Q6P3A9	Q6P3A9	ADP-ribosylation factor-like protein 11	0	0	0	0.961236	1.4175	1.47737	1.145	-0.0570367	0.503347	0.56303	0.19535	0.570136	0.196465	0.0196458	0.244615	3	3	3	3	3	3	3	3	15.4348	15.5042	15.5304	15.6068	15.3254	15.366	15.9555	16.0099	15.046	16.0261	16.3342	16.161	16.9712	17.2285	16.7177	17.5267	17.4985	17.5812	16.8877	16.7644	16.6398	17.1466	17.007
Arl15	Q8BGR6	Q8BGR6	ADP-ribosylation factor-like protein 15	0	0	0	0.968309	0.794543	0.891306	1.09714	-0.04646	-0.331803	-0.166007	0.133747	0.381418	0.2428	0.0302822	0.5629	3	3	3	3	3	3	3	3	15.9841	16.0558	16.1447	16.0329	16.005	16.0074	16.4529	16.223	16.754	16.513	16.0208	15.9007	16.5907	16.5879	16.5028	16.4307	16.4409	16.3118	16.7091	16.191	16.0401	16.5417	16.3264
Arl2	Q9D0J4	Q9D0J4	ADP-ribosylation factor-like protein 2	0	0	0	1.01594	1.03576	1.15636	1.28941	0.02281	0.05069	0.20959	0.366717	0.729674	0.412336	0.0312503	0.00127347	3	3	3	3	3	3	3	3	17.1157	17.116	17.1845	17.2644	17.153	17.0671	17.9627	17.8216	17.964	18.0038	17.9096	17.987	18.0989	18.0648	18.2442	18.3511	18.4006	18.285	17.6735	17.7801	17.7957	18.0683	18.1443
Arl2bp	Q9D385	Q9D385	ADP-ribosylation factor-like protein 2-binding protein	0	0	0	0.992946	1.29933	1.0726	0.987966	-0.0102133	0.377773	0.101113	-0.0174667	0.860615	0.258584	0.745253	NaN	3	3	3	3	3	3	3	2	12.6193	12.657	12.7221	12.7426	12.5884	12.6367	12.9641	13.68	12.8018	13.6955	13.5282	13.3555	14.6543	13.9455	13.7204	14.1278	14.3512	14.1445	12.7124	13.4093	13.4378	14.0051	12.3331
Arl3	Q9WUL7	Q9WUL7	ADP-ribosylation factor-like protein 3	0	0	0	1.06097	0.823049	0.998098	0.851296	0.08538	-0.28095	-0.00274667	-0.232267	0.157253	0.0224374	0.939526	0.136811	3	3	3	3	3	3	3	3	17.8851	17.9648	17.9237	18.0884	18.0027	17.9385	18.5605	18.4949	18.67	18.4112	18.2396	18.2318	18.6515	18.5721	18.6665	18.6216	18.6006	18.6597	18.3073	18.4147	18.0462	18.1266	18.0278
Arl4c	P61208	P61208	ADP-ribosylation factor-like protein 4C	0	0	0	0.845961	0.800753	0.935669	0.332881	-0.241337	-0.32057	-0.09593	-1.58692	0.245581	0.431473	0.609338	NaN	3	3	3	3	3	3	3	2	14.7984	14.7553	14.5146	14.1412	14.6242	14.5789	16.1282	15.5753	15.4367	14.7948	15.6524	15.7313	15.8998	15.8399	16.2493	15.7232	15.8561	16.1218	15.2775	15.7317	15.5859	14.6894	NaN
Arl5a	Q80ZU0	Q80ZU0	ADP-ribosylation factor-like protein 5A	0	0	0	0.954039	0.919469	1.23313	1.56787	-0.06788	-0.121127	0.30232	0.648807	0.236061	0.633244	0.101825	0.0074132	3	3	3	3	3	3	3	3	14.7788	14.9176	14.9138	14.8025	14.8316	14.7726	15.5055	15.6339	16.139	15.9	15.4629	15.5521	15.7639	16.1552	15.8409	16.0669	16.3124	16.2877	15.1254	15.3499	15.3121	15.7884	16.1291
Arl6ip1	Q9JKW0	Q9JKW0	ADP-ribosylation factor-like protein 6-interacting protein 1	0	0	0	0.997835	0.885628	0.924777	0.985966	-0.00312667	-0.175227	-0.112823	-0.02039	0.977275	0.0741163	0.012574	0.902228	3	3	3	3	3	3	3	3	18.2603	18.3355	18.5815	18.4255	18.319	18.4234	19.889	19.9874	20.0662	19.7242	19.7907	19.902	19.7948	19.7798	19.8298	19.7127	19.7076	19.6455	19.3869	19.1259	19.2209	18.9527	19.3485
Arl6ip4	Q9JM93	Q9JM93	ADP-ribosylation factor-like protein 6-interacting protein 4	0	-1	0	0.637152	0.879436	0.293111	0.288079	-0.65029	-0.18535	-1.77048	-1.79546	0.425205	0.30174	0.00113306	6.81069e-05	3	3	3	3	3	3	3	3	13.3511	13.4635	12.8946	11.1618	13.314	13.2825	14.6303	14.999	14.5111	14.4297	14.6158	14.5389	15.2994	15.4471	15.1311	13.4238	13.25	13.8924	14.6196	14.6587	14.4749	12.9543	12.6509
Arl6ip5	Q8R5J9	Q8R5J9	PRA1 family protein 3	0	0	0	0.940313	1.02545	0.948741	1.38968	-0.0887867	0.0362533	-0.0759133	0.474753	0.439993	0.774565	0.458383	0.121902	3	3	3	3	3	3	3	3	19.2446	19.4559	19.5738	19.3015	19.2937	19.4127	19.9599	20.2193	20.2566	20.3112	20.1737	20.0596	19.855	20.0169	20.0712	20.0165	19.9109	19.788	19.1497	18.4723	18.7604	19.0055	19.4946
Arl8a	Q8VEH3	Q8VEH3	ADP-ribosylation factor-like protein 8A	0	0	0	0.918416	1.61167	1.22629	1.44555	-0.12278	0.688553	0.2943	0.531623	0.0166388	0.000248925	0.0189976	0.00236938	3	3	3	3	3	3	3	3	20.6478	20.6896	20.7411	20.6002	20.5513	20.5585	21.2325	21.2314	21.3084	21.8467	21.9906	22.0006	21.6144	21.7495	21.495	21.8663	21.9422	21.9334	20.6791	20.5912	20.7101	21.0856	21.1689
Arl8b	Q9CQW2	Q9CQW2	ADP-ribosylation factor-like protein 8B	0	0	0	0.914062	1.51275	1.25014	1.14171	-0.129637	0.597177	0.322087	0.191197	0.131852	0.000669103	0.00477308	0.447366	3	3	3	3	3	3	3	3	18.4821	18.5268	18.5768	18.5242	18.3259	18.3467	20.1485	20.2112	20.0734	20.6833	20.7044	20.837	20.0955	20.1382	20.059	20.3157	20.4743	20.4689	19.5295	19.462	18.9311	19.2661	19.6976
Armc1	Q9D7A8	Q9D7A8	Armadillo repeat-containing protein 1	0	0	0	1.14454	0.510073	0.626422	0.610685	0.194763	-0.971223	-0.674793	-0.7115	0.303703	0.0207023	0.105061	0.122611	3	3	3	3	3	3	3	3	15.4031	15.4108	15.3686	15.868	15.601	15.2979	16.2034	16.235	16.9473	15.6862	15.3773	15.4085	16.4103	16.2372	17.0408	15.5043	15.9248	16.2348	16.1013	15.8954	15.5165	15.7677	14.7628
Armc10	Q9D0L7	Q9D0L7	Armadillo repeat-containing protein 10	0	0	0	1.00751	0.782815	0.730527	0.603387	0.01079	-0.353257	-0.45299	-0.728843	0.943368	0.0106241	0.00595346	0.00106939	3	3	3	3	3	3	3	3	17.0483	17.1183	16.9039	16.8946	17.29	16.9183	18.1141	17.9429	18.0787	17.8001	17.6012	17.6746	18.0075	17.9766	18.1082	17.5308	17.4778	17.7248	17.4287	17.4942	17.3514	16.7412	16.7983
Armc6	Q8BNU0	Q8BNU0	Armadillo repeat-containing protein 6	0	0	0	0.864857	0.866125	13.4985	0.278784	-0.209467	-0.207353	3.75473	-1.84278	0.593643	0.907413	0.0674179	0.39544	3	3	3	3	3	3	3	3	13.9762	13.5743	13.883	14.2833	13.2563	13.2655	15.4106	19.1392	15.7871	18.936	15.3261	15.4527	14.9448	19.6481	15.5969	21.1185	20.3162	20.0194	19.6289	20.0339	19.5428	19.9294	19.717
Armc8	Q9DBR3	Q9DBR3	Armadillo repeat-containing protein 8	0	0	0	1.0836	1.14024	0.971602	1.10818	0.115827	0.189333	-0.0415633	0.148187	0.0943761	0.158962	0.624316	0.430027	3	3	3	3	3	3	3	3	15.7953	15.863	15.7004	15.9131	15.8556	15.9376	16.823	16.9895	17.1968	17.2253	17.1646	17.1875	17.1915	17.2482	17.3578	17.3018	17.268	17.1029	16.5887	16.4651	16.5988	16.8585	16.3723
Armcx3	Q8BHS6	Q8BHS6	Armadillo repeat-containing X-linked protein 3	0	0	0	1.3971	1.26421	1.32656	6.79206	0.482437	0.338233	0.407693	2.76385	0.521271	0.34118	0.32264	0.0541438	3	3	3	3	3	3	3	3	13.0334	12.372	13.9546	12.7058	14.4766	13.6248	15.1943	14.2829	15.1729	15.3198	15.0428	15.3021	15.4266	14.7986	15.9419	16.05	15.7981	15.5421	15.2157	14.5145	13.8443	15.401	18.1794
Armt1	A6H630	A6H630	Protein-glutamate O-methyltransferase	0	0	0	1.10346	1.00748	0.992888	0.945428	0.14203	0.0107567	-0.0102967	-0.08096	0.554805	0.952441	0.955144	0.70198	3	3	3	3	3	3	3	3	15.5916	15.3878	15.3147	15.6503	15.187	15.8828	16.3315	16.3279	16.8025	16.5609	16.3733	16.56	16.5509	16.4226	16.962	16.523	16.6896	16.6921	16.3629	16.6325	16.4395	16.6308	16.0438
Arpc1a	Q9R0Q6	Q9R0Q6	Actin-related protein 2/3 complex subunit 1A	0	0	0	1.00589	0.72578	0.891898	1.05369	0.00847	-0.462397	-0.16505	0.07545	0.922753	0.0624277	0.526976	0.59809	3	3	3	3	3	3	3	3	17.263	17.228	17.4379	17.4019	17.324	17.2284	19.1702	18.7684	19.3542	18.7177	18.6466	18.5414	18.6752	18.3896	19.1983	18.6443	18.5483	18.5753	18.0772	18.153	18.5013	18.3418	18.2812
Arpc1b	Q9WV32	Q9WV32	Actin-related protein 2/3 complex subunit 1B	0	0	0	0.944258	1.16981	1.23381	1.21034	-0.0827467	0.22628	0.30312	0.275417	0.373697	0.145758	0.103729	0.063942	3	3	3	3	3	3	3	3	22.2313	22.192	22.1662	22.2737	22.0499	22.0177	22.4936	22.8167	22.4538	22.7944	22.9099	22.7386	22.6875	22.9986	22.5401	22.9434	23.0968	23.0953	22.4492	22.405	22.1058	22.6091	22.6035
Arpc2	Q9CVB6	Q9CVB6	Actin-related protein 2/3 complex subunit 2	0	0	0	0.960686	1.10333	1.14823	1.09432	-0.0578633	0.141863	0.199413	0.130033	0.422456	0.129466	0.0633196	0.241383	3	3	3	3	3	3	3	3	22.0591	22.0328	22.1606	22.1299	21.9754	21.9736	22.6008	22.4248	22.5256	22.7269	22.6982	22.5516	22.6044	22.7448	22.4868	22.8411	22.7649	22.8283	21.8662	21.7483	21.8592	21.9407	22.1111
Arpc3	Q9JM76	Q9JM76	Actin-related protein 2/3 complex subunit 3	0	0	0	0.929745	1.10218	1.10609	1.14202	-0.105093	0.140357	0.145463	0.19159	0.471896	0.286868	0.0980957	0.430478	3	3	3	3	3	3	3	3	21.0118	21.1401	21.4174	21.1948	21.0066	21.0526	22.4646	22.2865	22.4245	22.5896	22.6708	22.3361	21.7793	21.799	21.7121	22.0299	21.8746	21.8222	20.781	20.5543	20.5084	20.5098	21.1916
Arpc4	P59999	P59999	Actin-related protein 2/3 complex subunit 4	0	0	0	0.956186	1.17953	1.12241	1.51404	-0.0646367	0.238207	0.166603	0.5984	0.544392	0.0101427	0.0593953	6.57246e-05	3	3	3	3	3	3	3	3	22.1522	22.013	22.1366	22.2092	21.9673	21.9314	22.7209	22.6398	22.8171	22.9473	22.9751	22.97	22.5207	22.7241	22.6906	22.8321	22.7973	22.8058	22.242	22.2123	22.1988	22.752	22.8429
Arpc5	Q9CPW4	Q9CPW4	Actin-related protein 2/3 complex subunit 5	0	0	0	0.992294	1.15073	1.13071	0.945439	-0.01116	0.202553	0.17723	-0.0809433	0.929871	0.035184	0.149414	0.63855	3	3	3	3	3	3	3	3	22.3767	22.2188	22.3958	22.528	22.2364	22.1935	22.458	22.5374	22.404	22.6007	22.6356	22.7707	22.6597	22.7842	22.4577	22.8101	22.7613	22.8619	22.3069	22.3934	21.9929	21.9577	22.3109
Arpc5l	Q9D898	Q9D898	Actin-related protein 2/3 complex subunit 5-like protein	0	0	0	1.01597	1.04509	1.03098	0.955731	0.02286	0.06363	0.04402	-0.0653233	0.765419	0.704879	0.181846	0.369971	3	3	3	3	3	3	3	3	19.2374	19.0809	19.2029	19.3014	19.1637	19.1248	19.2456	19.6468	19.3528	19.3044	19.4798	19.6519	19.4287	19.3509	19.3438	19.4179	19.4149	19.4227	18.8907	18.7393	18.8584	18.8375	18.6809
Arpp19	P56212	P56212	cAMP-regulated phosphoprotein 19	0	0	0	1.03132	0.865345	1.01853	0.601855	0.04449	-0.208653	0.02649	-0.732513	0.773516	0.409335	0.903339	0.0704966	3	3	3	3	3	3	3	3	17.1353	16.8655	17.1001	17.3109	16.9393	16.9843	18.0146	17.3625	18.0032	17.6888	17.6142	17.4513	17.782	17.5814	18.0434	18.1298	17.743	17.6134	16.7549	15.8945	16.7889	15.7178	15.6577
Arrb1	Q8BWG8	Q8BWG8	Beta-arrestin-1	0	0	0	0.969032	0.90448	0.748356	0.736404	-0.0453833	-0.14484	-0.418203	-0.44143	0.646878	0.0195427	0.00783611	0.00953191	3	3	3	3	3	3	3	3	20.2282	20.0984	20.1597	20.2825	20.0126	20.0552	21.1699	21.2408	21.1971	21.0026	21.056	21.1146	21.4578	21.5953	21.4626	21.007	21.0239	21.2301	21.0556	21.0752	21.0347	20.7971	20.4874
Arrb2	Q91YI4	Q91YI4	Beta-arrestin-2	0	-1	0	0.898006	0.828173	0.626052	0.436198	-0.155203	-0.271997	-0.675647	-1.19694	0.0275993	0.0248984	0.0042366	1.21618e-05	3	3	3	3	3	3	3	3	19.6929	19.6115	19.7328	19.5552	19.4665	19.5498	20.2813	20.1274	20.1729	19.8331	20.0434	19.889	20.5562	20.6645	20.4832	19.846	19.7424	20.0886	20.2119	20.134	20.079	18.9906	18.932
Arrdc1	Q99KN1	Q99KN1	Arrestin domain-containing protein 1	0	0	0	1.24398	0.989931	0.826681	0.449567	0.314967	-0.0146	-0.274597	-1.15339	0.0018141	0.935003	0.0785826	0.0347392	3	3	3	3	3	3	3	3	14.0604	14.0501	13.9415	14.3681	14.3006	14.3283	15.4617	15.9615	15.6821	15.6979	15.8302	15.5333	16.0677	16.3525	16.027	15.7675	15.897	15.9589	14.5804	15.3665	15.2342	13.4422	13.8848
Arsa	P50428	P50428	Arylsulfatase A	0	0	-1	0.730711	1.16777	0.586073	0.390774	-0.452627	0.223757	-0.770847	-1.35559	0.0242799	0.176735	0.064908	0.00400363	3	3	3	3	3	3	3	3	19.4888	19.7755	19.5976	19.3627	19.0717	19.0696	19.9931	19.8177	19.6123	20.1179	20.1068	19.8697	20.192	20.0993	19.4874	18.9122	19.5742	18.9797	19.1055	19.5481	18.9579	18.1342	17.6987
Arsb	P50429	P50429	Arylsulfatase B	0	0	0	0.919401	1.11823	0.845256	0.657757	-0.121233	0.161213	-0.24254	-0.604373	0.273858	0.0703223	0.198624	0.00242987	3	3	3	3	3	3	3	3	22.6851	22.6758	22.6634	22.7363	22.5101	22.4142	22.1445	22.1833	21.986	22.2246	22.2586	22.3142	22.2449	22.395	21.9803	21.808	22.1524	21.9321	21.7553	21.8337	21.5626	21.1761	21.047
Arsg	Q3TYD4	Q3TYD4	Arylsulfatase G	0	0	-1	0.7909	1.20025	0.617935	0.447409	-0.338433	0.26333	-0.694473	-1.16033	0.111404	0.159279	0.0609883	0.00310397	3	3	3	3	3	3	3	3	17.0625	17.5861	17.2489	17.0835	16.8663	16.9324	17.9558	18.0269	17.5778	18.057	18.0529	18.2406	18.0877	18.2211	17.7677	17.3497	17.7241	16.9193	17.5242	17.7001	17.6617	16.1292	16.5706
Arvcf	P98203	P98203	Armadillo repeat protein deleted in velo-cardio-facial syndrome homolog	0	0	0	1.24781	0.828215	0.486019	0.122743	0.319403	-0.271923	-1.04092	-3.02629	0.386753	0.222812	0.0220386	NaN	3	3	3	3	3	3	3	1	11.2524	12.0614	12.2921	11.9993	12.2923	12.2725	12.609	13.0302	13.2447	12.6367	12.72	12.7114	13.0475	13.1389	13.605	11.8115	12.2567	12.6004	12.3488	12.6029	12.6862	NaN	9.51964
Arxes1;Arxes2	C0HK79;C0HK80	C0HK79	Adipocyte-related X-chromosome expressed sequence 1;Adipocyte-related X-chromosome expressed sequence 2	0	0	0	1.10098	0.333937	0.516562	1.32891	0.138783	-1.58235	-0.952987	0.41024	0.701737	0.00961465	0.151419	0.326375	3	3	3	3	3	3	3	3	12.4869	12.7255	12.6123	12.2533	12.6143	13.3734	13.7599	13.5006	14.2441	12.4707	11.7332	12.5537	13.3928	13.111	14.4733	12.9652	13.126	12.0269	11.5694	11.0341	12.2254	12.0604	12.2165
As3mt	Q91WU5	Q91WU5	Arsenite methyltransferase	0	0	0	0.982789	1.22877	1.13895	1.25873	-0.0250467	0.29721	0.187703	0.331967	0.684464	0.0316997	0.101964	0.0358732	3	3	3	3	3	3	3	3	18.5352	18.4106	18.5214	18.5147	18.3817	18.4957	19.5425	19.5393	19.321	19.6626	19.7798	19.852	19.6458	19.8209	19.5568	19.8218	19.8165	19.9484	19.3794	19.1508	19.0177	19.5423	19.489
Asah1	Q9WV54	Q9WV54	Acid ceramidase	0	-1	0	0.904373	0.979386	0.698689	0.567561	-0.14501	-0.03005	-0.517277	-0.817153	0.0629825	0.583278	0.0094443	0.00281123	3	3	3	3	3	3	3	3	22.6981	22.775	22.6164	22.6027	22.5634	22.4884	23.9347	24.0601	23.9141	23.9155	23.9825	23.9207	24.38	24.5572	24.3258	23.7351	24.014	23.9621	24.1436	24.4037	24.035	23.2569	23.4332
Asah2	Q9JHE3	Q9JHE3	Neutral ceramidase	0	0	0	1.01245	0.755468	1.16703	1.03792	0.0178533	-0.404557	0.22284	0.0536933	0.902441	NaN	NaN	NaN	3	3	3	2	2	3	3	2	13.8685	14.2931	14.1295	14.0395	14.0753	14.2299	15.4604	15.7196	15.5961	15.0886	NaN	15.2864	15.282	15.7565	NaN	15.5318	16.2035	15.491	15.472	15.5138	15.5662	15.7446	NaN
Asap1	Q9QWY8	Q9QWY8	Arf-GAP with SH3 domain, ANK repeat and PH domain-containing protein 1	0	0	0	0.952984	0.998945	1.21168	1.20928	-0.0694767	-0.00152333	0.27701	0.274143	0.384599	0.985268	0.0113579	0.0038233	3	3	3	3	3	3	3	3	17.0675	16.9667	16.9422	17.0287	16.9185	16.8208	17.9883	17.801	17.9468	18.0026	17.8196	17.9093	18.1116	18.1422	18.2845	18.5146	18.4527	18.402	17.7547	17.76	17.7609	17.9599	18.1163
Asap2	Q7SIG6	Q7SIG6	Arf-GAP with SH3 domain, ANK repeat and PH domain-containing protein 2	0	0	0	NaN	0.244014	0.985151	0.263703	NaN	-2.03497	-0.0215833	-1.92301	NaN	0.109789	0.983484	NaN	0	1	3	3	3	3	2	3	NaN	NaN	NaN	NaN	NaN	17.9687	13.9831	13.29	14.9019	11.6003	10.7617	13.7081	11.9546	12.3095	14.1596	13.1261	13.7966	11.4363	17.5662	NaN	12.3825	13.9774	12.0807
Asb6	Q91ZU1	Q91ZU1	Ankyrin repeat and SOCS box protein 6	0	0	0	1.24309	0.518692	1.09798	0.542162	0.313927	-0.94705	0.134847	-0.883203	NaN	NaN	0.753882	NaN	3	2	3	1	3	3	3	1	13.4073	13.4681	12.446	NaN	13.2993	13.5428	14.0867	13.5726	13.9459	NaN	NaN	12.9213	14.2789	13.3254	13.72	13.64	13.5976	14.4913	13.6736	14.1942	14.2065	NaN	NaN
Ascc1	Q9D8Z1	Q9D8Z1	Activating signal cointegrator 1 complex subunit 1	0	0	0	0.984985	1.18178	1.52466	0.746317	-0.0218267	0.240957	0.60849	-0.42214	0.975072	0.513235	0.45691	0.654576	3	3	3	3	3	3	3	3	13.4921	13.9034	12.3863	13.3186	14.019	12.3786	13.9503	14.5207	13.5354	13.8882	14.4252	14.4158	14.9521	16.6942	15.2474	16.8842	16.5961	15.2389	14.1455	14.0392	16.0845	13.9588	13.5926
Ascc2	Q91WR3	Q91WR3	Activating signal cointegrator 1 complex subunit 2	0	0	0	1.45449	1.23758	1.07719	1.24644	0.540513	0.307527	0.10727	0.31781	0.260878	0.028393	0.13342	0.0965397	3	3	3	3	3	3	3	3	14.0126	13.8957	14.3381	15.1419	14.8703	13.8558	14.9985	15.0242	15.2828	15.4021	15.4333	15.3928	15.5841	15.5919	15.6106	15.813	15.6699	15.6256	14.4584	14.4263	14.84	14.7751	14.9141
Ascc3	E9PZJ8	E9PZJ8	Activating signal cointegrator 1 complex subunit 3	0	0	0	0.913534	0.758594	1.42984	1.40966	-0.13047	-0.3986	0.515857	0.49535	0.64075	0.00117525	0.0306529	0.255308	3	3	3	3	3	3	3	3	14.5086	14.311	14.8386	14.0061	14.6405	14.6201	18.2356	18.1893	18.1212	17.7134	17.8179	17.8192	17.243	17.2511	17.595	18.0311	17.9319	17.6736	16.9838	17.2272	17.7155	17.2464	17.8684
Asf1a	Q9CQE6	Q9CQE6	Histone chaperone ASF1A	0	0	0	0.478289	1.13537	1.20483	1.16576	-1.06405	0.183157	0.268833	0.221273	NaN	0.492423	0.394896	0.537534	2	1	3	3	3	3	3	3	13.605	NaN	13.6919	12.5844	NaN	NaN	14.6763	14.7941	14.0767	14.8736	14.6872	14.5357	15.1913	14.4141	14.353	14.868	15.0846	14.8122	14.6099	14.3651	14.9156	14.4746	15.4157
Ash2l	Q91X20	Q91X20	Set1/Ash2 histone methyltransferase complex subunit ASH2	0	0	0	0.844032	1.13364	0.936986	0.984241	-0.24463	0.180957	-0.0939	-0.0229167	0.387767	0.21661	0.480204	0.908009	3	3	3	3	3	3	3	3	16.0655	16.2362	15.7776	15.3703	16.0914	15.8836	16.3737	16.6849	16.3314	16.5553	16.6385	16.739	16.9457	16.9492	16.739	16.7438	16.9717	16.6367	16.433	16.4198	16.0832	16.3539	16.505
Asl	Q91YI0	Q91YI0	Argininosuccinate lyase	0	0	0	0.930295	1.12126	1.22656	1.20427	-0.10424	0.16512	0.294613	0.26816	0.133636	0.0282147	0.0171422	0.0454549	3	3	3	3	3	3	3	3	19.0674	19.0628	19.1382	19.0843	18.9452	18.9261	19.5917	19.4961	19.6578	19.7388	19.7271	19.7749	19.6909	19.742	19.5036	19.974	19.9394	19.907	19.3402	19.3665	19.132	19.4997	19.6608
Asna1	O54984	O54984	ATPase Asna1	0	0	0	0.979156	1.07549	1.19068	1.3562	-0.03039	0.10499	0.25179	0.43957	0.742139	0.158036	0.0565645	0.00184889	3	3	3	3	3	3	3	3	19.4722	19.4388	19.565	19.6119	19.3538	19.4191	20.342	20.4382	20.471	20.457	20.4968	20.6124	20.3827	20.3984	20.5318	20.7615	20.7812	20.5256	19.8574	19.9655	19.9477	20.2698	20.3796
Asns	Q61024	Q61024	Asparagine synthetase [glutamine-hydrolyzing]	0	0	0	4.91858	0.364725	0.382203	0.592733	2.29824	-1.45512	-1.38759	-0.754545	NaN	NaN	NaN	NaN	1	1	2	2	2	2	2	1	NaN	NaN	8.81291	NaN	NaN	11.1112	NaN	13.0675	13.798	NaN	11.53	12.4252	13.1595	13.3624	NaN	NaN	13.0914	10.6553	14.9485	NaN	12.9725	NaN	NaN
Aspa	Q8R3P0	Q8R3P0	Aspartoacylase	0	0	0	0.73464	0.35998	0.613869	1.54936	-0.44489	-1.47401	-0.703997	0.631677	0.444593	0.000416379	0.476414	0.0756387	3	3	3	3	3	3	3	3	14.9509	15.4489	13.7944	14.1072	14.0886	14.6638	18.5651	18.43	18.8407	17.2571	17.0412	17.1154	18.0594	16.147	18.7578	17.3632	17.4222	16.0668	17.0898	17.0209	17.6466	17.972	17.5451
Asph	Q8BSY0	Q8BSY0	Aspartyl/asparaginyl beta-hydroxylase	0	0	1	0.997499	1.29331	1.37877	1.57078	-0.00361333	0.37107	0.46338	0.651483	0.959969	0.00203048	0.0165276	0.000638554	3	3	3	3	3	3	3	3	20.2128	20.1882	20.228	20.3293	20.1885	20.1004	20.2837	20.3669	20.2011	20.6512	20.622	20.6917	20.4665	20.7262	20.3291	20.9557	20.9836	20.9727	20.2779	20.2575	20.1142	20.7974	20.9469
Aspscr1	Q8VBT9	Q8VBT9	Tether containing UBX domain for GLUT4	0	0	0	0.943371	1.05617	1.06336	1.02209	-0.0841033	0.0788367	0.08863	0.03152	0.0487102	0.376729	0.0399348	0.710502	3	3	3	3	3	3	3	3	16.8464	16.8855	16.8984	16.8437	16.7715	16.7629	17.2303	17.3561	17.2525	17.2339	17.3685	17.4731	17.5615	17.6394	17.5488	17.6552	17.6814	17.679	16.835	17.0779	16.9725	17.0605	16.9367
Asrgl1	Q8C0M9	Q8C0M9	Isoaspartyl peptidase/L-asparaginase	0	0	0	1.10884	0.343344	0.566301	1.15434	0.14905	-1.54227	-0.82036	0.20707	0.0367613	0.00118855	0.118567	0.241787	3	3	3	3	3	3	3	3	16.3061	16.4714	16.4055	16.5484	16.5332	16.5486	18.9484	18.8483	19.1983	17.658	17.1495	17.5607	18.5471	18.1201	19.3389	17.982	18.1253	17.4377	17.2111	17.3361	17.4873	17.7151	17.2995
Ass1	P16460	P16460	Argininosuccinate synthase	0	0	0	1.08767	0.432371	0.919497	1.53819	0.121247	-1.20966	-0.121083	0.62123	0.663868	0.0206908	0.843689	0.0840818	3	3	3	3	3	3	3	3	13.7577	14.2849	14.5366	14.2367	14.157	14.5493	18.2011	17.8618	18.7144	17.366	16.6464	17.136	17.4794	16.6466	18.5392	17.627	17.5954	17.0795	16.3849	16.2488	16.4866	16.501	17.3971
Astn2	Q80Z10	Q80Z10	Astrotactin-2	0	0	-1	0.921036	0.730335	0.628408	0.142844	-0.11867	-0.45337	-0.670227	-2.80748	0.673194	0.0976439	0.338322	0.00051437	3	3	3	3	3	3	3	3	18.189	18.5296	18.84	18.0382	18.5766	18.5878	20.4607	20.4152	20.1323	20.2312	19.6071	19.8099	20.3639	20.2018	18.4989	18.9761	19.3086	18.7693	20.9183	21.0756	21.036	18.7426	17.9138
Asun	Q8QZV7	Q8QZV7	Protein asunder homolog	0	0	0	0.999769	1.49565	1.29195	1.38584	-0.000333333	0.580777	0.369547	0.470763	0.997842	0.0053296	0.350623	0.0206803	3	3	3	3	3	3	3	3	14.1121	14.1804	14.0205	13.8931	14.2312	14.1878	14.4402	14.2581	14.1671	14.9726	14.7394	14.8957	15.0145	14.9021	14.1416	15.2118	15.3293	14.6257	14.0501	14.218	14.4115	14.6859	14.8276
Atad1	Q9D5T0	Q9D5T0	ATPase family AAA domain-containing protein 1	0	0	0	0.975527	0.720788	0.833804	0.819018	-0.0357467	-0.472353	-0.26222	-0.288033	0.337129	0.00281835	0.0187582	0.0189064	3	3	3	3	3	3	3	3	17.4593	17.5134	17.4217	17.4278	17.463	17.3964	18.6571	18.7603	18.8871	18.3509	18.2771	18.2594	18.7123	18.7242	18.9105	18.4744	18.5287	18.5571	18.3521	18.5203	18.271	18.1118	18.0572
Atad3	Q925I1	Q925I1	ATPase family AAA domain-containing protein 3	0	0	0	1.09496	0.793899	0.577004	0.421848	0.130883	-0.332973	-0.793347	-1.2452	0.482505	0.0317514	0.0212193	0.0160351	3	3	3	3	3	3	3	3	16.7392	16.4922	16.8139	17.0881	16.7007	16.649	17.455	17.3055	17.6459	17.1044	17.108	17.195	17.7793	17.6911	18.1861	17.3644	17.0752	16.8369	17.1146	16.8318	17.2041	15.2275	16.051
Atat1	Q8K341	Q8K341	Alpha-tubulin N-acetyltransferase 1	0	0	0	1.92048	0.902709	0.623741	1.12823	0.941463	-0.147667	-0.68098	0.17406	0.0662257	0.301342	0.0986423	0.907985	3	3	3	3	3	3	3	3	11.0799	12.2089	11.1698	12.3674	12.2953	12.6204	14.0166	14.0725	14.1346	13.9282	13.7188	14.1337	14.1544	14.0695	14.7703	13.9841	13.7535	13.2137	10.868	13.888	13.3688	14.2418	10.7859
Atcay	Q8BHE3	Q8BHE3	Caytaxin	0	0	0	1.4825	0.611769	0.979599	1.51537	0.568035	-0.70894	-0.0297367	0.59967	NaN	0.0536193	0.973391	0.26074	1	2	3	3	3	3	3	3	NaN	NaN	11.3993	NaN	11.8337	12.101	15.6438	15.572	16.3253	15.2998	14.9429	15.1716	15.1756	13.7203	16.4822	15.2881	15.4125	14.5883	13.1343	13.129	14.2728	13.6176	14.2466
Ate1	Q9Z2A5	Q9Z2A5	Arginyl-tRNA--protein transferase 1	0	0	0	0.919208	1.10009	0.881128	0.961547	-0.121537	0.137623	-0.182577	-0.05657	0.230896	0.406615	0.250075	0.706885	3	3	3	3	3	3	3	3	15.184	15.1883	15.1	15.0649	14.8831	15.1597	15.905	16.2579	16.1513	16.3952	16.292	16.0398	16.5488	16.5562	16.5155	16.6144	16.3029	16.1555	16.0286	15.7974	15.6459	15.8465	15.5975
Atf2;Atf7	P16951;Q8R0S1	P16951	Cyclic AMP-dependent transcription factor ATF-2;Cyclic AMP-dependent transcription factor ATF-7	0	0	0	NaN	2.18665	0.735277	NaN	NaN	1.12873	-0.443639	NaN	NaN	NaN	NaN	NaN	0	0	1	2	1	3	0	0	NaN	NaN	NaN	NaN	NaN	NaN	NaN	NaN	10.1492	NaN	10.9287	11.6272	NaN	10.4588	NaN	10.1492	10.3541	9.54217	NaN	NaN	NaN	NaN	NaN
Atg12	Q9CQY1	Q9CQY1	Ubiquitin-like protein ATG12	0	0	0	1.00198	1.14463	1.28064	1.09527	0.00286	0.194883	0.35687	0.131283	0.986644	0.308782	0.00545491	0.683675	3	3	3	3	3	3	3	3	15.6438	15.4795	15.8862	15.859	15.4822	15.6769	16.8234	16.5111	16.9199	17.1549	16.9173	16.7668	16.4981	16.6118	16.7087	16.9165	16.9936	16.9791	14.6466	14.6164	14.7305	14.3479	15.3588
Atg13	Q91YI1	Q91YI1	Autophagy-related protein 13	0	0	0	0.872431	1.18841	0.820421	0.98392	-0.196887	0.249027	-0.285563	-0.0233867	0.651743	0.515199	0.0705738	0.838102	3	3	3	3	3	3	3	3	16.3682	16.4123	16.2743	16.7298	16.3544	15.38	16.0143	15.9036	15.8448	16.8215	15.644	16.0442	16.0585	16.2341	16.3709	15.9826	15.7911	16.033	15.7705	15.5359	15.8527	15.5968	15.7554
Atg14	Q8CDJ3	Q8CDJ3	Beclin 1-associated autophagy-related key regulator	0	0	0	0.994953	1.02043	1.39578	1.35642	-0.0073	0.029175	0.481077	0.439805	0.947161	NaN	0.00925519	NaN	3	3	2	2	3	3	2	3	13.2896	13.0523	12.9802	13.1805	13.0929	13.0268	14.9185	14.5798	NaN	14.917	NaN	14.6397	14.959	14.8526	14.9467	15.4155	15.5597	15.2264	14.4065	NaN	14.4625	15.0872	14.8301
Atg16l1	Q8C0J2	Q8C0J2	Autophagy-related protein 16-1	0	0	0	0.983125	1.13394	1.23859	1.20313	-0.0245533	0.18134	0.308693	0.266787	0.817884	0.00345288	0.00326673	0.041979	3	3	3	3	3	3	3	3	15.6336	15.428	15.7653	15.584	15.6164	15.5529	17.001	17.0227	17.0505	17.2504	17.206	17.162	16.9222	16.8869	16.8274	17.2564	17.1903	17.116	15.9406	15.9786	15.8015	16.0442	16.2955
Atg2a	Q6P4T0	Q6P4T0	Autophagy-related protein 2 homolog A	0	0	1	0.552353	1.08403	1.03919	2.65023	-0.856337	0.1164	0.05546	1.40612	0.03038	0.534102	0.842679	0.00630774	3	3	3	3	3	3	3	3	13.0674	13.2593	13.3747	11.9098	12.4855	12.7372	16.2365	16.6547	16.2659	16.3157	16.6818	16.5087	16.1677	16.1632	16.674	16.7611	16.3339	16.0763	15.117	15.0934	15.8273	16.818	16.5235
Atg2b	Q80XK6	Q80XK6	Autophagy-related protein 2 homolog B	0	0	0	0.816997	0.885381	1.20751	1.25315	-0.291597	-0.17563	0.27203	0.325563	0.511251	0.623152	0.26387	0.444738	3	3	3	3	3	3	3	3	13.611	12.8591	13.3299	12.5111	13.6383	12.7758	14.6858	14.4083	15.2444	14.8517	14.7963	14.1636	15.0995	15.2102	14.7204	15.0431	15.5527	15.2503	15.0794	13.9848	14.7232	14.5036	15.1041
Atg3	Q9CPX6	Q9CPX6	Ubiquitin-like-conjugating enzyme ATG3	0	0	0	0.959193	0.980152	1.01008	0.981992	-0.0601067	-0.0289233	0.0144633	-0.0262167	0.414319	0.55078	0.755102	0.463488	3	3	3	3	3	3	3	3	18.4763	18.3908	18.4173	18.49	18.3112	18.3029	19.4364	19.4589	19.5608	19.4831	19.4746	19.4115	19.6386	19.7102	19.6145	19.7066	19.6957	19.6045	19.366	19.2832	19.2622	19.2898	19.2671
Atg4b	Q8BGE6	Q8BGE6	Cysteine protease ATG4B	0	0	0	0.947769	0.913361	1.10613	0.960382	-0.0773933	-0.130743	0.145527	-0.05832	0.345165	0.1605	0.0999094	0.597992	3	3	3	3	3	3	3	3	15.879	15.9982	16.0185	15.9902	15.79	15.8833	17.0449	17.087	17.1686	16.8671	17.0949	16.9463	17.1313	17.1812	17.3063	17.2958	17.3208	17.4389	16.4101	16.366	16.6171	16.4274	16.2819
Atg4c	Q811C2	Q811C2	Cysteine protease ATG4C	0	0	0	0.882477	0.717231	0.7748	0.865499	-0.18037	-0.47949	-0.368103	-0.208397	0.297286	0.0577596	0.0743949	0.351164	3	3	3	3	3	3	3	3	13.9308	13.5374	13.4607	13.4949	13.3857	13.5072	14.9804	14.4093	14.5005	14.2227	14.0807	14.1485	14.5437	14.938	14.5448	14.1751	14.4496	14.2975	14.3817	13.9158	13.9319	14.1131	13.6988
Atg5	Q99J83	Q99J83	Autophagy protein 5	0	0	0	0.960664	1.2032	1.29882	1.3374	-0.0578967	0.26688	0.377197	0.41943	0.314832	0.0777644	0.00735841	0.00492753	3	3	3	3	3	3	3	3	16.1933	16.2912	16.1776	16.0913	16.1995	16.1975	16.6593	17.0254	16.9302	17.1933	17.1197	17.1027	17.1375	17.1247	17.0116	17.4783	17.5733	17.3539	16.8681	16.763	16.7437	17.3155	17.0952
Atg7	Q9D906	Q9D906	Ubiquitin-like modifier-activating enzyme ATG7	0	0	1	0.972224	1.0986	1.29658	1.55941	-0.04064	0.135663	0.37471	0.640997	0.605412	0.124781	0.0072523	0.00138077	3	3	3	3	3	3	3	3	17.7999	17.8323	17.9659	17.9287	17.7662	17.7813	18.4253	18.457	18.6018	18.5977	18.5756	18.7178	18.6941	18.6829	18.6092	19.0984	19.1135	18.8984	18.2943	18.2957	18.3016	18.777	19.0053
Atg9a	Q68FE2	Q68FE2	Autophagy-related protein 9A	0	0	0	NaN	2.51392	5.74538	0.972531	NaN	1.32994	2.5224	-0.0401833	NaN	0.00136323	0.248969	NaN	0	0	3	3	3	3	1	3	NaN	NaN	NaN	NaN	NaN	NaN	15.6354	15.1334	15.1687	16.5821	16.6181	16.7271	10.1898	14.9788	16.3485	16.4541	16.5216	16.1087	NaN	NaN	15.336	15.0188	14.8489
Atic	Q9CWJ9	Q9CWJ9	Bifunctional purine biosynthesis protein PURH	0	0	0	0.900984	1.25434	1.1992	1.22302	-0.150427	0.326927	0.26207	0.290447	0.00378705	0.000424702	0.0497863	0.0892395	3	3	3	3	3	3	3	3	19.9649	19.8952	19.8975	19.7792	19.7491	19.778	20.4791	20.3926	20.3945	20.7687	20.7462	20.7322	20.6188	20.7073	20.3985	20.8311	20.8034	20.8763	19.9692	19.957	20.0712	20.4386	20.0415
Atl1	Q8BH66	Q8BH66	Atlastin-1	0	0	0	1.07115	0.64821	0.774729	1.09877	0.0991567	-0.625467	-0.368237	0.135883	0.36721	0.0571137	0.412945	0.430515	3	3	3	3	3	3	3	3	16.1475	16.0453	16.1091	16.3766	16.0616	16.1612	17.7957	17.7985	18.2789	17.0657	17.2738	17.6572	17.6256	16.9124	18.2399	17.3717	17.3253	16.9763	17.0962	17.3466	17.5123	17.4177	17.3072
Atl2	Q6PA06	Q6PA06	Atlastin-2	0	0	0	0.964674	1.01222	1.14761	1.21387	-0.0518867	0.0175167	0.198633	0.27961	0.685284	0.920239	0.453147	0.223392	3	3	3	3	3	3	3	3	15.6205	15.4606	15.6607	15.3873	15.4719	15.727	15.1901	15.4267	15.5858	15.4013	15.2241	15.6298	15.354	15.7471	15.9419	15.6077	15.8526	16.1788	14.7131	14.5927	15.1882	14.9861	15.1251
Atl3	Q91YH5	Q91YH5	Atlastin-3	0	0	0	0.65484	1.14015	1.01054	1.08592	-0.610787	0.189223	0.01512	0.118913	0.386533	0.0736939	0.899186	0.524372	3	3	3	3	3	3	3	3	18.5454	16.6649	16.6566	16.7342	16.6246	16.6756	17.6295	17.8481	17.77	18.0272	17.9124	17.8757	18.1248	18.2711	17.9603	18.2645	18.0945	18.0425	17.398	17.3555	17.3986	17.5831	17.1766
Atm	Q62388	Q62388	Serine-protein kinase ATM	0	0	0	0.761592	1.16036	1.37948	0.854216	-0.39291	0.21457	0.464127	-0.227327	0.142673	0.696948	0.00384674	NaN	3	3	3	3	3	3	2	3	13.0701	13.5454	13.0014	13.0356	12.8222	12.5804	11.8847	13.3561	13.4767	13.0936	13.0934	13.1742	13.2208	13.2948	13.0705	13.6382	13.7369	13.6033	13.5047	NaN	12.5809	12.893	12.5993
Atox1	O08997	O08997	Copper transport protein ATOX1	0	0	0	0.845947	1.47887	1.6505	2.03079	-0.24136	0.564493	0.7229	1.02204	0.121811	0.103372	0.0391817	0.00341472	3	3	3	3	3	3	3	3	20.3399	19.9367	20.1498	19.884	19.9775	19.8407	20.6434	20.1046	19.754	20.8532	20.6038	20.7385	20.5746	20.333	20.0036	21.2199	21.1785	20.6815	19.9909	20.4822	20.2405	21.3908	21.2838
Atp11a	P98197	P98197	Probable phospholipid-transporting ATPase IH	0	0	0	1.49364	1.43891	1.51273	2.13479	0.578833	0.524977	0.597157	1.09409	NaN	0.158488	0.420273	0.0563609	3	2	3	3	3	3	3	3	10.5464	11.7523	12.2437	NaN	12.3856	11.8003	11.8116	12.4965	12.4335	12.984	12.3517	12.9807	12.7911	14.1209	12.1718	14.279	13.1708	13.4254	12.8292	12.6173	11.5378	13.6118	13.301
Atp11c	Q9QZW0	Q9QZW0	Phospholipid-transporting ATPase 11C	0	0	0	1.51301	1.11236	1.11114	1.10137	0.59742	0.15362	0.152037	0.1393	0.0022537	0.0530427	0.361292	0.340324	3	3	3	3	3	3	3	3	15.5857	15.5047	15.7623	16.2767	16.2284	16.1398	16.7548	16.7847	16.6403	16.8228	16.873	16.9448	16.8769	17.1629	16.9412	16.9987	17.0559	17.3825	16.6498	16.4202	16.7155	16.5544	16.7868
Atp12a	Q9Z1W8	Q9Z1W8	Potassium-transporting ATPase alpha chain 2	0	0	0	1.06177	1.65392	1.27174	1.09229	0.08647	0.725887	0.346803	0.12736	0.647515	0.219229	0.0888334	0.310598	3	3	3	3	3	3	3	3	15.9962	16.0457	15.6943	16.257	15.7932	15.9454	17.2923	15.6565	16.9512	17.3241	17.3985	17.3549	17.4638	17.6081	17.0923	17.7467	17.7623	17.6957	17.3221	17.2708	17.4121	17.261	17.5378
Atp13a1	Q9EPE9	Q9EPE9	Manganese-transporting ATPase 13A1	0	0	0	1.04003	1.23281	1.45905	1.38033	0.0566233	0.301953	0.545027	0.46501	0.502286	0.0109213	0.0270754	0.024458	3	3	3	3	3	3	3	3	17.3265	17.3418	17.2234	17.2469	17.3364	17.4781	18.3459	18.2783	18.1194	18.5557	18.541	18.5527	18.4926	18.5786	18.1393	18.9519	19.0969	18.7968	18.1706	18.1353	17.8673	18.3638	18.6792
Atp13a2	Q9CTG6	Q9CTG6	Probable cation-transporting ATPase 13A2	0	0	0	0.916902	1.07872	0.931205	0.910986	-0.12516	0.109317	-0.10283	-0.1345	0.259476	0.124668	0.29662	0.258021	3	3	3	3	3	3	3	3	13.476	13.4243	13.2394	13.3341	13.131	13.2991	14.8867	14.8466	14.8739	15.0365	15.0305	14.8681	15.3955	15.452	15.2515	15.1657	15.3772	15.2475	14.9559	14.9569	14.7681	14.8277	14.5987
Atp1a1	Q8VDN2	Q8VDN2	Sodium/potassium-transporting ATPase subunit alpha-1	0	0	0	1.18313	0.422884	0.668091	1.00988	0.242603	-1.24167	-0.581883	0.0141833	0.00190286	0.00725171	0.305362	0.946913	3	3	3	3	3	3	3	3	20.8915	20.9631	20.9636	21.1489	21.1703	21.2268	23.8315	23.58	24.3106	22.7957	22.4241	22.7774	23.4437	22.7189	24.3436	23.078	23.0763	22.6063	22.3584	22.2755	22.8505	22.6236	22.3345
Atp1a2	Q6PIE5	Q6PIE5	Sodium/potassium-transporting ATPase subunit alpha-2	0	0	0	1.04105	0.31706	0.59101	1.20713	0.0580333	-1.65717	-0.758747	0.271583	0.691311	0.00395044	0.221019	0.140444	3	3	3	3	3	3	3	3	19.8045	20.1308	19.8868	19.8839	19.9269	20.1855	23.9437	23.6175	24.3491	22.5677	21.9664	22.4047	23.294	22.5574	24.1705	22.7259	22.9039	22.1158	21.9428	22.114	22.3883	22.4933	22.2775
Atp1a3	Q6PIC6	Q6PIC6	Sodium/potassium-transporting ATPase subunit alpha-3	0	0	0	1.23604	0.306319	0.522435	1.07637	0.30572	-1.70689	-0.936677	0.10617	0.0887877	0.00466562	0.226221	0.792713	3	3	3	3	3	3	3	3	17.5992	17.7925	17.4737	17.8466	17.8091	18.1269	22.3977	22.217	22.9494	21.0983	20.4225	20.9226	21.8603	20.7653	22.8425	21.173	21.1267	20.3585	20.4757	20.5391	21.3363	21.1952	20.3786
Atp1a4	Q9WV27	Q9WV27	Sodium/potassium-transporting ATPase subunit alpha-4	0	0	0	1.57438	0.670414	0.900528	1.34358	0.654783	-0.576877	-0.151157	0.426083	0.0273937	0.0546412	0.640866	0.0883471	3	3	3	3	3	3	3	3	15.0153	15.2011	15.0772	16.1127	15.4993	15.6458	17.1799	16.9674	17.6071	16.7083	16.4818	16.8336	16.9419	16.4661	17.4175	16.9866	16.8151	16.5704	16.1406	16.2928	16.4299	16.8124	16.3816
Atp1b1	P14094	P14094	Sodium/potassium-transporting ATPase subunit beta-1	0	0	0	1.44157	0.303327	0.511905	0.771093	0.527637	-1.72105	-0.966053	-0.375023	0.0769462	0.00808389	0.181818	0.310156	3	3	3	3	3	3	3	3	19.6288	19.9356	19.7525	19.9122	20.383	20.6047	23.798	23.2947	24.2223	22.4415	21.653	22.0574	23.2775	22.2456	24.2092	22.499	22.4384	21.8967	21.8843	21.924	22.7284	22.0816	21.4971
Atp1b2	P14231	P14231	Sodium/potassium-transporting ATPase subunit beta-2	0	0	1	0.813928	0.333467	0.771291	1.67474	-0.297027	-1.58438	-0.374653	0.743937	0.0562601	0.00590587	0.487138	0.00471978	3	3	3	3	3	3	3	3	18.3541	18.6702	18.4415	18.0989	18.1726	18.3032	21.4549	20.973	21.593	20.1355	19.3434	19.7888	20.528	20.0971	21.4235	20.4707	20.7196	19.7343	18.7444	18.5484	18.8749	19.6127	19.4844
Atp1b3	P97370	P97370	Sodium/potassium-transporting ATPase subunit beta-3	0	0	1	0.98925	0.70325	1.00228	1.42531	-0.0155933	-0.50789	0.00329	0.511273	0.905713	0.0089576	0.987149	0.00802645	3	3	3	3	3	3	3	3	19.1612	19.1272	19.3813	19.3432	19.0256	19.254	21.2336	21.0654	21.2989	20.8492	20.6456	20.5795	20.9922	20.6765	21.145	21.1941	20.8891	20.7403	19.9344	19.8694	19.9972	20.6043	20.4626
Atp2a2	O55143	O55143	Sarcoplasmic/endoplasmic reticulum calcium ATPase 2	0	0	0	1.01213	0.789383	0.868576	0.874765	0.01739	-0.341203	-0.203277	-0.193033	0.534337	0.0140986	0.00485987	0.0306592	3	3	3	3	3	3	3	3	19.9886	19.9918	19.9578	20.0427	19.9682	19.9795	21.1918	21.0742	21.3458	20.9063	20.8283	20.8536	21.2091	21.2248	21.2865	21.0406	20.988	21.082	20.7178	20.7552	20.7056	20.5481	20.6236
Atp2a3	Q64518	Q64518	Sarcoplasmic/endoplasmic reticulum calcium ATPase 3	0	0	0	1.25346	0.589071	0.294301	1.25672	0.32592	-0.763487	-1.76463	0.32966	0.416028	0.0237425	0.00728024	0.673264	3	3	3	3	3	3	3	3	13.5271	14.176	14.3312	13.8712	14.3629	14.7779	16.3621	16.0363	16.4348	15.4762	15.2293	15.8374	16.0309	16.6394	16.9646	15.0553	14.3489	14.9368	14.9171	14.721	14.9872	15.55	13.8188
Atp2b1	G5E829	G5E829	Plasma membrane calcium-transporting ATPase 1	0	0	0	1.02455	0.603326	0.776013	1.01633	0.0349933	-0.72899	-0.365847	0.02337	0.598834	0.0121144	0.250271	0.770729	3	3	3	3	3	3	3	3	18.2783	18.2438	18.3694	18.2352	18.3839	18.3775	20.8965	20.7316	21.2489	20.3678	20.1603	20.1618	20.318	19.8378	20.7638	20.0342	19.932	19.856	19.13	19.0769	19.3002	19.203	19.131
Atp2b2	Q9R0K7	Q9R0K7	Plasma membrane calcium-transporting ATPase 2	0	0	0	1.31488	0.51507	0.723143	1.159	0.394933	-0.95716	-0.467647	0.212887	0.079169	0.0227622	0.470228	0.491887	3	3	3	3	3	3	3	3	15.7745	15.8109	16.1844	16.1301	16.3272	16.4974	19.8091	19.4763	20.3481	18.957	18.77	19.035	18.8637	17.9774	19.9028	18.6606	18.6058	18.0745	17.5029	17.5507	18.2375	17.6889	18.2047
Atp2b4	Q6Q477	Q6Q477	Plasma membrane calcium-transporting ATPase 4	0	0	0	0.540956	0.694662	0.347881	3.96793	-0.886417	-0.525617	-1.52333	1.98839	0.260086	0.510937	0.0840174	0.216969	3	3	3	3	3	3	3	3	17.2905	19.0952	17.0515	17.3109	16.6236	16.8434	20.7653	20.2507	20.8241	21.4872	19.5524	19.2236	20.837	20.2398	21.7661	20.2435	18.5303	19.4991	16.6196	20.2795	19.4291	19.2229	21.2508
Atp2c1	Q80XR2	Q80XR2	Calcium-transporting ATPase type 2C member 1	0	0	0	0.91893	1.27684	1.3043	1.29375	-0.121973	0.352583	0.383273	0.371553	0.370816	0.00257882	0.0245134	0.00992871	3	3	3	3	3	3	3	3	17.2814	17.5639	17.5015	17.3364	17.1743	17.4702	16.6511	16.6818	16.7978	17.0778	17.009	17.1017	16.9584	17.2009	16.8861	17.5029	17.3304	17.362	16.3645	16.411	16.2423	16.6954	16.8267
Atp5a1	Q03265	Q03265	ATP synthase subunit alpha, mitochondrial	0	0	0	1.048	0.459524	0.722891	0.889389	0.0676333	-1.12179	-0.46815	-0.169113	0.0305029	0.00444202	0.222553	0.0865623	3	3	3	3	3	3	3	3	23.2884	23.3263	23.3389	23.3582	23.394	23.4043	25.2379	25.1447	25.7189	24.3182	24.0909	24.3271	24.9739	24.4947	25.5661	24.6664	24.6102	24.3536	24.3118	24.1959	24.4006	24.0841	24.0921
Atp5b	P56480	P56480	ATP synthase subunit beta, mitochondrial	0	0	0	1.0137	0.45293	0.724242	0.949483	0.0196267	-1.14264	-0.465457	-0.0747867	0.48087	0.0016141	0.179191	0.43934	3	3	3	3	3	3	3	3	22.0486	22.1217	22.0817	22.1295	22.0993	22.0821	23.9811	23.9135	24.3434	22.993	22.7985	23.0186	23.6788	23.2667	24.2169	23.3394	23.329	23.0978	23.0732	23.1029	23.2403	23.0995	22.9283
Atp5c1	Q91VR2	Q91VR2	ATP synthase subunit gamma, mitochondrial	0	0	0	1.06148	0.428467	0.703318	0.832389	0.0860833	-1.22274	-0.50775	-0.26467	0.0618305	0.00241461	0.160373	0.0478073	3	3	3	3	3	3	3	3	20.8325	20.7848	20.8047	20.9517	20.8798	20.8488	22.9303	22.7453	23.2941	21.912	21.6427	21.7468	22.5527	22.1216	23.0872	22.1798	22.1692	21.8893	21.4628	21.3504	21.4409	20.987	21.2826
Atp5d	Q9D3D9	Q9D3D9	ATP synthase subunit delta, mitochondrial	0	0	0	0.867092	0.524439	0.734318	0.825448	-0.205743	-0.931153	-0.445523	-0.27675	0.379597	0.00321377	0.315061	0.00892142	3	3	3	3	3	3	3	3	20.1111	19.966	20.65	20.0614	20.0324	20.0161	21.7219	21.6404	21.9227	20.9878	20.5921	20.9116	21.7996	20.8694	21.5872	21.1653	21.3093	20.445	20.3664	20.4107	20.4821	20.1667	20.2107
Atp5e	P56382	P56382	ATP synthase subunit epsilon, mitochondrial	0	0	0	1.10787	0.606876	0.572361	1.22672	0.147793	-0.720527	-0.805003	0.294803	0.433823	0.0363311	0.174046	0.631186	3	3	3	3	3	3	3	3	18.0442	17.8329	18.351	18.345	18.0745	18.2518	20.6828	20.3093	20.6673	19.6744	20.2263	19.5971	20.5972	19.0783	20.4651	19.3018	19.261	19.1628	18.6511	18.6905	18.318	18.092	19.9314
Atp5f1	Q9CQQ7	Q9CQQ7	ATP synthase F(0) complex subunit B1, mitochondrial	0	0	0	1.06276	0.456935	0.759103	1.03108	0.0878133	-1.12994	-0.397633	0.0441533	0.357351	0.00554258	0.333885	0.762341	3	3	3	3	3	3	3	3	18.8774	18.8946	19.1115	19.1104	18.9789	19.0577	21.8843	21.7033	22.3644	20.9726	20.7482	20.8413	21.0509	20.6707	21.8527	20.9684	20.7872	20.6258	19.7311	19.6042	20.0023	19.6972	19.9364
Atp5h	Q9DCX2	Q9DCX2	ATP synthase subunit d, mitochondrial	0	0	0	0.955175	0.535643	0.840487	0.842267	-0.0661633	-0.900657	-0.250703	-0.24765	0.3404	0.00373589	0.475294	0.00131273	3	3	3	3	3	3	3	3	20.5787	20.5341	20.5798	20.5127	20.5926	20.3888	22.2515	21.9609	22.3963	21.4438	21.1869	21.276	22.0724	21.2202	22.0958	21.7042	21.6574	21.2747	21.3423	21.4061	21.3886	21.1749	21.0907
Atp5i	Q06185	Q06185	ATP synthase subunit e, mitochondrial	0	0	0	1.02084	0.493474	0.783166	1.13196	0.0297567	-1.01895	-0.35261	0.17882	0.706804	0.0202254	0.43477	0.339823	3	3	3	3	3	3	3	3	19.7066	19.5912	19.5995	19.7656	19.6746	19.5464	21.5401	21.7955	22.3573	21.1203	20.6887	20.827	21.2447	21.0858	22.3025	21.3707	21.2881	20.9164	20.6065	20.2908	20.6614	20.9266	20.5318
Atp5j	P97450	P97450	ATP synthase-coupling factor 6, mitochondrial	0	0	0	0.927055	0.508076	0.942482	1.21807	-0.109273	-0.976883	-0.0854633	0.2846	0.289483	0.00778598	0.84258	0.130103	3	3	3	3	3	3	3	3	19.6933	19.4849	19.6618	19.5215	19.6013	19.3895	21.3622	20.8423	21.4069	20.3663	20.094	20.2204	20.876	20.096	21.2119	20.839	20.9069	20.1817	20.2282	20.4678	20.5072	20.8301	20.4438
Atp5j2	P56135	P56135	ATP synthase subunit f, mitochondrial	0	0	0	0.926991	0.461093	0.654924	1.25081	-0.109373	-1.11687	-0.6106	0.322867	0.201985	0.0211405	0.179492	0.225563	3	3	3	3	3	3	3	3	19.9703	19.9198	20.0711	19.7685	19.9088	19.9558	21.3909	21.2226	22.1718	20.3192	20.5394	20.5761	21.2647	20.9159	22.1286	21.012	20.6443	20.8211	20.2307	19.9388	20.4928	20.5476	20.2663
Atp5l	Q9CPQ8	Q9CPQ8	ATP synthase subunit g, mitochondrial	0	0	0	1.0165	0.438431	0.808932	0.912977	0.0236067	-1.18958	-0.30591	-0.13135	0.247793	0.00471482	0.366743	0.0858913	3	3	3	3	3	3	3	3	20.3436	20.3816	20.3959	20.4129	20.3905	20.3884	22.5805	22.2539	22.8913	21.5507	21.2074	21.3989	22.1775	21.6372	22.6156	21.9949	21.8718	21.6458	21.1333	21.056	21.244	20.9952	20.9922
Atp5o	Q9DB20	Q9DB20	ATP synthase subunit O, mitochondrial	0	0	0	1.04634	0.395771	0.63716	0.547581	0.0653467	-1.33726	-0.650273	-0.868857	0.0612571	0.0046216	0.0581089	7.60097e-06	3	3	3	3	3	3	3	3	21.1207	21.1361	21.1067	21.2176	21.1396	21.2023	22.7505	22.4439	23.1339	21.6749	21.2694	21.3721	22.4049	22.029	22.8787	21.7965	21.7393	21.8259	21.5148	21.6045	21.5394	20.6987	20.6925
Atp5s	Q9CRA7	Q9CRA7	ATP synthase subunit s, mitochondrial	0	0	0	0.802893	0.572983	0.712084	0.807927	-0.31672	-0.803437	-0.48988	-0.307703	0.320412	0.00467313	0.0944215	0.0549878	3	3	3	3	3	3	3	3	13.8848	14.2308	13.4412	13.8568	13.36	13.3899	15.9458	15.6005	15.9815	15.1351	14.8998	15.0825	15.0672	15.0135	15.6814	14.6556	14.8859	14.751	14.3467	14.3483	14.6867	14.1885	14.1247
Atp6ap1	Q9R1Q9	Q9R1Q9	V-type proton ATPase subunit S1	0	0	0	1.108	1.54326	1.38061	2.50337	0.147963	0.625977	0.465307	1.32387	0.050702	0.0354494	0.0950028	0.000184999	3	3	3	3	3	3	3	3	17.1529	17.1897	17.0355	17.2928	17.2215	17.3077	18.6624	18.4058	19.0179	19.2202	19.5077	19.2361	18.7217	18.4496	19.1392	19.3389	19.2751	19.0925	17.9305	17.9113	18.2186	19.3409	19.3351
Atp6ap2	Q9CYN9	Q9CYN9	Renin receptor	0	0	0	1.12433	0.971207	1.34195	1.45966	0.169067	-0.04215	0.42433	0.54563	0.478681	0.821415	0.208813	0.00450277	3	3	3	3	3	3	3	3	15.0043	14.8766	15.0006	15.2357	14.7201	15.4329	17.2303	17.0143	17.5655	17.3542	17.1131	17.2165	17.0489	16.6154	17.5026	17.6922	17.4765	17.2711	16.2529	16.1125	16.3941	16.7281	16.7766
Atp6v0a1	Q9Z1G4	Q9Z1G4	V-type proton ATPase 116 kDa subunit a isoform 1	0	0	1	1.18165	0.935172	1.16244	2.12551	0.240803	-0.0966967	0.217153	1.08781	0.225934	0.688316	0.706882	0.00450219	3	3	3	3	3	3	3	3	17.9812	17.9487	17.798	17.8545	18.198	18.3978	20.9603	21.0524	21.668	21.1771	21.0757	21.1379	20.8165	20.1194	21.8754	21.2913	21.352	20.8195	19.4842	19.3804	19.9341	20.6827	20.5473
Atp6v0a2	P15920	P15920	V-type proton ATPase 116 kDa subunit a isoform 2	0	0	0	0.974164	1.15549	0.86877	0.765356	-0.0377633	0.2085	-0.202953	-0.385797	0.845235	0.0941159	0.190748	0.0414176	3	3	3	3	3	3	3	3	16.7363	16.5898	16.3364	16.2541	16.569	16.7261	16.8777	17.1525	17.0415	17.3295	17.2171	17.1506	17.6083	17.7808	17.5968	17.2402	17.5099	17.6268	17.1171	17.2048	16.83	16.643	16.7856
Atp6v0c	P63082	P63082	V-type proton ATPase 16 kDa proteolipid subunit	0	0	0	1.09224	1.06424	1.01892	1.20956	0.12729	0.08982	0.0270467	0.274477	0.348537	0.647497	0.90033	0.178183	3	3	3	3	3	3	3	3	17.8539	17.601	17.6429	17.6482	17.8845	17.9469	17.8079	17.9673	17.7848	17.822	18.2839	17.7236	18.5807	18.2354	18.5318	18.574	18.7127	18.1425	18.0075	17.7969	18.2862	18.474	18.1633
Atp6v0d1	P51863	P51863	V-type proton ATPase subunit d 1	0	0	0	1.07282	0.925433	1.30088	1.77953	0.101407	-0.1118	0.379483	0.8315	0.455837	0.5576	0.272999	0.00215477	3	3	3	3	3	3	3	3	20.0632	20.0071	19.7432	19.8928	20.1044	20.1206	22.1628	22.0922	22.6051	22.0768	22.1383	22.3097	22.0236	21.676	22.6669	22.5363	22.6039	22.3648	21.4344	21.6149	21.8224	22.5305	22.4177
Atp6v0d2	Q80SY3	Q80SY3	V-type proton ATPase subunit d 2	0	0	0	NaN	NaN	NaN	NaN	NaN	NaN	NaN	NaN	NaN	NaN	NaN	NaN	0	1	0	0	1	0	0	3	NaN	NaN	NaN	NaN	9.22102	NaN	NaN	NaN	NaN	NaN	NaN	NaN	15.7651	NaN	NaN	NaN	NaN	NaN	NaN	NaN	NaN	15.8995	17.0502
Atp6v1a	P50516	P50516	V-type proton ATPase catalytic subunit A	0	0	1	1.02751	0.794088	1.23334	1.72783	0.0391467	-0.33263	0.302567	0.788963	0.452552	0.12143	0.500255	0.010469	3	3	3	3	3	3	3	3	19.8738	19.9805	20.006	20.0368	19.9541	19.9867	21.613	21.5509	22.0723	21.4308	21.3333	21.4743	21.2144	20.7904	22.0983	21.8366	21.7747	21.3994	20.3568	20.3415	20.8402	21.2616	21.228
Atp6v1b2	P62814	P62814	V-type proton ATPase subunit B, brain isoform	0	0	1	1.03643	0.858682	1.12103	1.76788	0.0516233	-0.219803	0.164823	0.822017	0.239715	0.267427	0.62308	0.00328898	3	3	3	3	3	3	3	3	20.3482	20.2793	20.361	20.4037	20.3264	20.4132	22.1826	22.0047	22.549	22.1375	22.0023	21.9372	21.9206	21.5075	22.5202	22.2726	22.2163	21.9538	21.2357	21.2675	21.5662	22.3151	22.0453
Atp6v1c1	Q9Z1G3	Q9Z1G3	V-type proton ATPase subunit C 1	0	0	1	0.992645	0.954334	1.47365	1.84904	-0.01065	-0.0674333	0.559397	0.886773	0.830778	0.610882	0.0703452	0.00083158	3	3	3	3	3	3	3	3	19.0429	19.0839	19.1589	19.1455	19.0368	19.0714	20.6891	20.5881	20.965	20.6669	20.6044	20.7685	20.6076	20.3755	21.0578	21.3575	21.3403	21.0213	20.0033	20.1093	20.3142	21.0117	20.9769
Atp6v1d	P57746	P57746	V-type proton ATPase subunit D	0	0	1	0.999617	0.613032	1.11372	1.427	-0.000553333	-0.705967	0.15539	0.512987	0.993155	0.0236914	0.717187	0.0444577	3	3	3	3	3	3	3	3	18.0037	18.1228	18.1996	18.0669	18.1305	18.1271	19.9817	19.7817	20.4075	19.3019	19.2557	19.4953	19.5296	19.1075	20.3942	19.9716	19.9481	19.5778	18.6583	18.6424	19.083	19.1409	19.2858
Atp6v1e1	P50518	P50518	V-type proton ATPase subunit E 1	0	0	1	0.966193	0.768065	1.22676	1.86405	-0.0496167	-0.3807	0.29485	0.898443	0.614971	0.070606	0.435526	0.00634947	3	3	3	3	3	3	3	3	18.7097	18.7996	18.6296	18.7712	18.5149	18.704	20.3107	20.2244	20.5785	19.8681	19.8866	20.2167	20.0024	19.4995	20.6085	20.4535	20.4398	20.1016	19.2489	19.4173	19.8156	20.4113	20.3253
Atp6v1f	Q9D1K2	Q9D1K2	V-type proton ATPase subunit F	0	0	0	0.961121	0.895397	1.0742	1.52838	-0.05721	-0.1594	0.103263	0.612007	0.420742	0.117635	0.700847	0.00740372	3	3	3	3	3	3	3	3	18.1739	18.1715	18.3049	18.2518	18.1148	18.112	19.4963	19.3652	19.6041	19.3869	19.3498	19.2506	19.4245	19.032	19.6918	19.6416	19.6518	19.1646	18.4979	18.4695	18.7793	19.2647	19.2668
Atp6v1g1	Q9CR51	Q9CR51	V-type proton ATPase subunit G 1	0	0	0	0.928309	1.19054	1.54522	2.13034	-0.107323	0.251613	0.627813	1.09109	0.0552937	0.013668	0.00592275	0.00140874	3	3	3	3	3	3	3	3	19.8087	19.8748	19.8113	19.7917	19.691	19.6901	20.6705	20.8652	20.7865	21.0055	21.0649	21.0066	20.8453	20.7691	20.8983	21.6076	21.5427	21.2457	20.4306	20.3549	20.5721	21.7878	21.3931
Atp6v1g2	Q9WTT4	Q9WTT4	V-type proton ATPase subunit G 2	0	0	0	1.5406	0.477687	0.848467	1.47582	0.623493	-1.06586	-0.23707	0.561513	0.00186162	0.0208752	0.773117	0.165677	3	3	3	3	3	3	3	3	15.3981	15.4449	15.594	16.2246	16.0287	16.0542	20.0314	19.8582	20.6955	19.202	18.8693	19.3161	19.3823	18.067	20.5824	19.3725	19.3429	18.6052	18.1454	18.2391	18.9838	19.1153	18.6345
Atp6v1h	Q8BVE3	Q8BVE3	V-type proton ATPase subunit H	0	0	1	1.06094	0.71	1.03973	1.61942	0.0853367	-0.49411	0.0562133	0.69548	0.131698	0.0983048	0.885704	0.00617605	3	3	3	3	3	3	3	3	18.6289	18.5689	18.6571	18.7423	18.6299	18.7386	20.4053	20.0967	20.8719	20.0333	19.8746	19.9836	20.0106	19.5892	20.8004	20.3291	20.2275	20.0123	19.0467	19.0669	19.4382	19.8856	19.9352
Atp7a	Q64430	Q64430	Copper-transporting ATPase 1	0	0	0	1.05972	1.22812	1.2037	1.39807	0.08368	0.296447	0.26747	0.483433	0.306792	0.0115122	0.0393446	0.0434041	3	3	3	3	3	3	3	3	15.741	15.8239	15.7255	15.7309	15.9543	15.8564	16.8662	17.0063	16.9744	17.142	17.3059	17.2884	17.2017	17.4507	17.178	17.5383	17.5747	17.5198	16.9786	16.9547	16.99	17.7874	17.3191
Atp8a1	P70704	P70704	Phospholipid-transporting ATPase IA	0	0	0	0.98218	1.4104	1.39044	1.54671	-0.02594	0.496103	0.475547	0.629207	0.712278	0.0137535	0.0245	0.00138397	3	3	3	3	3	3	3	3	18.6676	18.5063	18.5085	18.6041	18.4735	18.527	19.7163	19.7948	20.048	20.2457	20.3385	20.4632	19.889	19.7611	20.1446	20.4996	20.4623	20.2595	19.2666	19.267	19.4123	19.9709	20.0382
Atp8a2	P98200	P98200	Phospholipid-transporting ATPase IB	0	0	-1	0.985333	1.02072	0.804044	0.671465	-0.0213167	0.0295867	-0.314653	-0.574617	0.808892	0.79179	0.035797	0.00678616	3	3	3	3	3	3	3	3	17.0666	17.1188	17.1647	17.2502	17.0241	17.0119	18.1507	18.4525	18.4486	18.3171	18.4075	18.416	18.3163	18.5378	18.5861	18.191	18.0553	18.25	18.3297	18.1149	18.3514	17.5885	17.6299
Atp9a	O70228	O70228	Probable phospholipid-transporting ATPase IIA	0	0	0	2.46014	1.76547	1.25905	1.86596	1.29874	0.820053	0.33233	0.899917	NaN	0.0408552	0.622762	0.0973867	2	3	3	3	3	3	3	3	13.3554	NaN	10.7614	13.7151	13.1212	13.2351	15.5929	15.7117	16.4398	16.8536	16.5928	16.7582	14.6584	16.7383	15.7121	16.0941	16.2984	15.7133	15.7937	14.4177	14.8111	15.9982	15.7418
Atp9b	P98195	P98195	Probable phospholipid-transporting ATPase IIB	0	0	0	1.23394	0.891776	0.88568	0.971615	0.30327	-0.165247	-0.175143	-0.0415433	0.395499	0.0261155	0.0889953	0.522894	3	3	3	3	3	3	3	3	16.7565	16.3531	15.6994	16.6409	16.4082	16.6697	17.2593	17.249	17.3757	17.0893	17.1765	17.1224	17.2685	17.1338	17.2399	17.1556	17.0366	16.9244	16.7895	16.8065	16.6767	16.7789	16.7361
Atpaf1	Q811I0	Q811I0	ATP synthase mitochondrial F1 complex assembly factor 1	0	0	0	1.02422	0.639073	0.97933	1.16906	0.03453	-0.645947	-0.0301333	0.225347	0.815877	0.00737297	0.922419	0.0891025	3	3	3	3	3	3	3	3	15.034	14.9306	14.6938	15.1105	14.8463	14.8052	16.676	16.5353	16.9666	16.0994	16.1014	16.0392	16.1919	16.0219	16.8558	16.4432	16.4894	16.0466	15.8357	15.7876	16.0234	16.1209	15.9791
Atpaf2	Q91YY4	Q91YY4	ATP synthase mitochondrial F1 complex assembly factor 2	0	0	0	1.34375	0.428503	0.894426	0.440318	0.426263	-1.22262	-0.160967	-1.18338	NaN	0.306978	0.791935	0.212051	3	1	3	3	3	3	3	3	13.8798	15.8204	14.0383	NaN	NaN	15.0058	16.805	14.6145	17.2056	16.312	14.215	14.4302	17.2028	16.5254	16.6413	17.1384	17.1814	15.567	13.8694	14.223	14.1568	13.4496	13.9079
Atpif1	O35143	O35143	ATPase inhibitor, mitochondrial	0	0	0	0.99858	0.439641	0.914617	0.988062	-0.00205	-1.1856	-0.12876	-0.0173267	0.985238	0.00587276	0.689797	0.962096	3	3	3	3	3	3	3	3	17.0288	16.8264	16.9145	17.0746	16.9121	16.7767	19.2222	18.8596	19.5378	18.0064	17.8498	18.2065	18.1579	18.0111	18.713	18.3149	18.4309	17.7499	15.9937	17.0754	16.6884	16.7752	16.3246
Atrn	Q9WU60	Q9WU60	Attractin	0	0	0	NaN	NaN	NaN	NaN	NaN	NaN	NaN	NaN	NaN	NaN	NaN	NaN	0	0	0	0	0	1	0	3	NaN	NaN	NaN	NaN	NaN	NaN	NaN	NaN	NaN	NaN	NaN	NaN	NaN	NaN	NaN	NaN	NaN	12.5579	NaN	NaN	NaN	12.9619	11.8847
Atrx	Q61687	Q61687	Transcriptional regulator ATRX	0	0	0	0.84119	1.29587	1.27211	1.49537	-0.249497	0.37392	0.347223	0.5805	0.336362	0.0200126	0.098325	0.00190385	3	3	3	3	3	3	3	3	13.948	13.9456	13.3806	13.3776	13.7663	13.3818	15.1115	15.3803	15.1032	15.6073	15.6189	15.4905	14.914	15.0158	14.8466	15.4853	15.3596	14.9732	14.5492	14.4285	14.4138	14.9142	15.0789
Atxn10	P28658	P28658	Ataxin-10	0	0	1	0.990698	1.12369	1.38374	1.5802	-0.0134833	0.168243	0.46857	0.660103	0.835752	0.0287426	0.00355432	0.0110816	3	3	3	3	3	3	3	3	17.9143	17.8304	17.9652	17.9819	17.8312	17.8564	19.0877	19.0911	19.1293	19.2836	19.1813	19.3479	19.0581	19.1945	19.2825	19.6598	19.7078	19.5733	18.8302	18.6891	18.6436	19.5363	19.498
Atxn2	O70305	O70305	Ataxin-2	0	0	0	1.42844	0.984282	0.99536	0.784238	0.51444	-0.0228567	-0.00671	-0.350637	0.101122	0.957064	0.96062	0.0813347	3	3	3	3	3	3	3	3	12.7957	12.254	11.9749	12.8965	12.866	12.8053	14.797	15.5252	14.1452	14.8204	14.7631	14.8152	15.3096	15.0095	15.0316	14.9938	15.0645	15.2723	14.4116	14.5801	14.0787	13.952	14.0699
Atxn2l	Q7TQH0	Q7TQH0	Ataxin-2-like protein	0	0	0	1.10397	1.06436	1.0116	0.865185	0.142707	0.08999	0.0166433	-0.20892	0.021058	0.235533	0.878149	0.382372	3	3	3	3	3	3	3	3	17.5927	17.5821	17.6877	17.8001	17.735	17.7555	18.7676	18.704	18.5811	18.7584	18.7246	18.8396	19.035	18.9776	18.7594	19.0312	18.9574	18.8333	18.5398	18.456	18.2208	17.832	18.4746
Atxn3	Q9CVD2	Q9CVD2	Ataxin-3	0	0	0	0.892021	1.30067	1.03091	0.74164	-0.16485	0.37925	0.04392	-0.43121	0.205317	0.0138125	0.776411	0.00638218	3	3	3	3	3	3	3	3	15.9879	15.9953	15.9071	15.5887	15.9205	15.8865	16.1855	16.4388	16.2714	16.7546	16.6992	16.5796	16.8289	16.9679	16.5096	16.7248	16.8158	16.8976	16.3436	16.2787	16.2749	16.0198	15.752
Auh	Q9JLZ3	Q9JLZ3	Methylglutaconyl-CoA hydratase, mitochondrial	0	0	0	1.14541	0.38179	0.613915	0.762083	0.19586	-1.38915	-0.70389	-0.39198	0.00809773	0.00408331	0.125083	0.00243779	3	3	3	3	3	3	3	3	17.5949	17.6906	17.6871	17.8525	17.8107	17.897	19.7597	19.352	20.0549	18.542	18.1392	18.3178	19.4763	18.883	20.1012	18.9413	18.7877	18.6198	18.3545	18.4987	18.5438	18.0813	18.0584
Aup1	P70295	P70295	Ancient ubiquitous protein 1	0	0	0	0.933501	1.02433	0.928317	0.958269	-0.0992767	0.03468	-0.10731	-0.0614967	0.0455053	0.481287	0.375206	0.665346	3	3	3	3	3	3	3	3	17.2841	17.2998	17.3391	17.1476	17.2351	17.2425	18.3763	18.3739	18.3504	18.4188	18.4675	18.3183	18.6153	18.9034	18.5845	18.5225	18.6328	18.6258	18.601	18.3814	18.3057	18.2587	18.5629
Aven	Q9D9K3	Q9D9K3	Cell death regulator Aven	0	0	0	1.86256	8.94049	2.11892	4.80112	0.897289	3.16035	1.08333	2.26337	0.26897	NaN	0.00420154	0.185864	3	3	2	2	3	3	3	3	12.1449	11.8264	9.91448	12.2808	12.0617	12.2352	9.67288	10.658	NaN	13.0886	13.563	NaN	14.0218	13.7512	13.3924	14.8003	14.7583	14.8568	10.7995	8.16964	7.47597	12.5231	11.5389
Avl9	Q80U56	Q80U56	Late secretory pathway protein AVL9 homolog	0	0	0	1.3496	0.740805	1.05312	1.70968	0.43253	-0.432833	0.0746767	0.77373	0.376164	0.122491	0.751453	0.000789622	3	3	3	3	3	3	3	3	13.8896	13.7385	13.9249	14.0633	15.1155	13.6719	15.8165	15.4128	16.0191	15.5429	15.0868	15.3202	15.3712	15.3979	16.001	15.8214	15.5938	15.579	14.5775	14.4666	14.549	15.4527	15.2718
Axl	Q00993	Q00993	Tyrosine-protein kinase receptor UFO	0	0	0	NaN	NaN	13.0943	12.23	NaN	NaN	3.71087	3.61235	NaN	NaN	NaN	0.00230738	0	1	0	3	1	3	3	3	NaN	NaN	NaN	13.0528	NaN	NaN	NaN	NaN	NaN	14.2731	13.5449	13.5967	11.8885	NaN	NaN	15.7995	15.6551	15.3435	11.535	10.7378	12.5418	15.2168	15.1555
Azi2	Q9QYP6	Q9QYP6	5-azacytidine-induced protein 2	0	0	0	1.02274	1.21549	0.953832	2.01315	0.03244	0.281533	-0.0681933	1.00946	NaN	0.318837	0.795937	NaN	1	3	3	3	3	3	1	2	NaN	12.889	NaN	12.2032	13.2612	13.2999	14.9862	15.1331	14.4026	15.2154	15.2427	14.9083	15.1179	14.6217	15.2488	14.6172	15.0561	15.1105	13.6261	NaN	NaN	14.422	NaN
B2m	P01887	P01887	Beta-2-microglobulin	0	0	0	0.901934	1.41869	1.88619	1.78757	-0.148907	0.50456	0.915473	0.838003	0.0777895	0.0604544	0.00472515	0.00408523	3	3	3	3	3	3	3	3	20.0186	19.8778	20.003	19.9004	19.8054	19.7469	20.4509	20.2644	19.9278	20.9175	20.7366	20.5027	20.5054	20.4262	20.069	21.2293	21.412	21.1058	20.6407	20.5539	20.3086	21.1434	21.3944
B3galnt1	Q920V1	Q920V1	UDP-GalNAc:beta-1,3-N-acetylgalactosaminyltransferase 1	0	0	-1	0.744039	1.94619	1.23155	0.512244	-0.42655	0.960653	0.300477	-0.965097	0.134525	0.208705	0.360946	0.0365567	3	3	3	3	3	3	3	3	15.5045	15.0879	15.4752	14.6128	14.9245	15.2506	13.3074	15.1838	13.3159	14.6625	14.8525	15.1741	14.9911	15.2973	14.4872	15.0957	15.0168	15.5645	14.7615	14.7463	14.5024	14.1125	13.8844
B3gat3	P58158	P58158	Galactosylgalactosylxylosylprotein 3-beta-glucuronosyltransferase 3	0	0	0	0.542958	1.40928	1.15322	1.5904	-0.881087	0.49496	0.20567	0.66939	0.181438	0.0380502	0.644675	0.0705157	3	3	3	3	3	3	3	3	15.6127	15.8082	15.4328	13.6694	15.2239	15.3171	15.2156	15.4474	15.6157	16.0505	15.6949	16.0181	17.0552	15.7915	15.8765	16.3295	16.5566	16.4541	15.1324	15.9425	15.2745	15.9023	16.2689
B3glct	Q8BHT6	Q8BHT6	Beta-1,3-glucosyltransferase	0	0	0	1.2679	0.859222	1.24557	1.39658	0.34244	-0.218897	0.316803	0.4819	0.0037344	0.100908	0.204277	0.00572272	3	3	3	3	3	3	3	3	13.241	13.2734	13.2637	13.7131	13.5455	13.5468	14.2786	14.0377	14.2542	14.0988	13.8618	13.9532	14.3498	14.2268	14.4849	15.0429	14.3819	14.5871	14.1937	13.9218	13.9892	14.5473	14.4448
B4galt1	P15535	P15535	Beta-1,4-galactosyltransferase 1	0	0	0	1.00605	0.734024	0.887005	1.23794	0.00869667	-0.4461	-0.172987	0.30794	0.982873	NaN	0.547986	0.181456	3	3	2	2	3	3	3	3	15.4121	15.1641	14.2882	15.2415	14.993	14.656	15.455	16.2559	NaN	15.35	15.4687	NaN	16.2933	16.2102	15.5914	15.8067	15.6399	16.1293	16.2457	16.8463	16.3463	16.8696	16.7259
B4galt5	Q9JMK0	Q9JMK0	Beta-1,4-galactosyltransferase 5	0	0	1	0.996561	1.24055	1.37515	1.62036	-0.00497	0.310977	0.459593	0.696317	0.946002	0.14863	0.0378496	0.00495429	3	3	3	3	3	3	3	3	17.3006	17.0686	17.2259	17.1855	17.2113	17.1835	16.6205	16.8293	16.7015	16.7507	17.0178	17.3156	17.1104	17.0866	16.7629	17.6304	17.4234	17.285	16.7369	16.8791	16.8389	17.7012	17.3
Babam1	Q3UI43	Q3UI43	BRISC and BRCA1-A complex member 1	0	0	0	0.970547	1.17788	1.15966	0.734674	-0.04313	0.23619	0.2137	-0.444823	0.246247	0.14827	0.267304	0.161276	3	3	3	3	3	3	3	3	17.3335	17.3444	17.3683	17.3654	17.2703	17.2811	18.1878	18.0333	17.9355	18.5079	18.1823	18.175	18.6497	18.7017	18.1999	18.7825	18.7718	18.6381	17.0394	17.0733	17.0032	16.8493	16.8551
Bace1	P56818	P56818	Beta-secretase 1	0	0	0	0.95176	0.962709	1.74172	0.682123	-0.07133	-0.0548283	0.80051	-0.551897	NaN	NaN	NaN	NaN	1	1	2	3	1	2	1	3	NaN	13.5645	NaN	13.4932	NaN	NaN	NaN	14.5265	12.9304	14.2942	13.2275	13.4992	NaN	NaN	12.612	13.7164	13.1086	NaN	NaN	13.9216	NaN	13.2249	13.2182
Bach1	P97302	P97302	Transcription regulator protein BACH1	0	0	0	0.911167	1.06743	1.00302	0.552982	-0.134213	0.09414	0.00435667	-0.854697	0.573665	0.503178	0.973198	0.00581484	3	3	3	3	3	3	3	3	14.9397	14.4887	14.3222	14.2259	14.6302	14.4918	15.5354	15.7129	15.4517	15.6438	15.846	15.4926	16.0594	16.0462	15.6942	15.9263	15.9827	15.9039	15.5373	15.9927	15.7158	14.9713	14.7177
Bad	Q61337	Q61337	Bcl2-associated agonist of cell death	0	0	0	0.997337	1.10017	0.722328	0.670703	-0.00384667	0.137723	-0.469273	-0.576255	0.958304	0.61355	0.0524794	NaN	3	3	3	3	3	3	3	2	15.0151	14.8485	15.0457	14.9272	14.941	15.0295	14.2625	14.5127	15.0847	14.6708	14.8847	14.7174	15.0191	15.1503	14.9902	14.5858	14.2977	14.8683	14.6082	13.7359	14.3895	13.5556	NaN
Bag1	Q60739	Q60739	BAG family molecular chaperone regulator 1	0	0	0	0.918665	1.40186	1.57208	1.31457	-0.12239	0.487343	0.652677	0.394587	0.0083676	0.00201564	0.010327	0.00449771	3	3	3	3	3	3	3	3	18.0465	18.0457	18.044	17.8785	17.9659	17.9246	18.9023	19.0147	18.8171	19.4638	19.3964	19.336	19.2233	19.2415	18.8674	19.8339	19.8431	19.6132	18.7512	18.7786	18.6117	19.1076	19.0311
Bag3	Q9JLV1	Q9JLV1	BAG family molecular chaperone regulator 3	0	0	0	0.972482	0.946917	1.00167	1.13851	-0.0402567	-0.07869	0.00240333	0.187147	0.838898	0.416325	0.966069	0.379975	3	3	3	3	3	3	3	3	14.7879	14.6352	14.7133	14.3113	14.856	14.8483	16.4249	16.3723	16.2759	16.4261	16.1788	16.2321	16.5101	16.5601	16.5809	16.5011	16.6502	16.507	16.1002	15.9448	16.2438	16.5405	15.9648
Bag4	Q8CI61	Q8CI61	BAG family molecular chaperone regulator 4	0	0	0	1.02351	1.08315	1.18689	1.70085	0.0335267	0.115233	0.247187	0.76626	0.82273	0.463499	0.246635	0.0297995	3	3	3	3	3	3	3	3	13.2995	13.4441	13.2025	13.4559	13.484	13.1068	14.8311	14.7937	14.5476	14.886	15.0043	14.6279	14.9601	14.9786	15.3808	15.3257	15.574	15.1612	14.0753	14.2525	14.7958	15.1776	14.9834
Bag5	Q8CI32	Q8CI32	BAG family molecular chaperone regulator 5	0	0	0	0.986315	0.991119	1.13545	1.46019	-0.01988	-0.01287	0.183263	0.546153	0.868129	0.907576	0.069806	0.00157446	3	3	3	3	3	3	3	3	15.2675	15.4861	15.1226	15.3084	15.3121	15.196	16.3978	16.3756	16.6114	16.3792	16.5927	16.3742	16.7894	16.8579	16.9253	17.1592	17.0208	16.9423	16.1706	16.1279	16.1685	16.799	16.5657
Bag6	Q9Z1R2	Q9Z1R2	Large proline-rich protein BAG6	0	0	0	1.09153	1.1663	1.18267	1.43771	0.126353	0.22194	0.24205	0.523777	0.110683	0.0602384	0.0783253	0.00155482	3	3	3	3	3	3	3	3	17.11	17.1137	16.961	17.2533	17.129	17.1816	17.7561	17.9199	17.6911	18.113	17.9454	17.9745	18.0897	18.1393	18.1684	18.4576	18.4911	18.1748	17.614	17.4345	17.6345	18.1348	18.0564
Baiap2	Q8BKX1	Q8BKX1	Brain-specific angiogenesis inhibitor 1-associated protein 2	0	0	1	1.98776	0.914869	1.99625	4.60566	0.991143	-0.128363	0.997293	2.20341	NaN	0.687384	0.25239	0.000582997	2	3	3	3	3	3	3	3	NaN	12.6628	12.2722	13.321	13.3929	13.6621	16.7217	16.2265	17.1582	16.8061	16.3806	16.5346	15.9067	14.6188	16.9336	17.0336	17.2477	16.1698	14.6851	14.7026	15.3316	17.1337	17.209
Baiap2l2	Q80Y61	Q80Y61	Brain-specific angiogenesis inhibitor 1-associated protein 2-like protein 2	0	0	0	NaN	2.18308	69.3434	NaN	NaN	1.12637	6.11569	NaN	NaN	NaN	NaN	NaN	0	1	1	3	1	3	0	3	NaN	NaN	NaN	NaN	16.7434	NaN	15.5789	NaN	NaN	17.1539	16.3615	16.6005	NaN	NaN	11.9735	18.3414	18.3752	17.5511	NaN	NaN	NaN	18.3484	18.1779
Bak1	O08734	O08734	Bcl-2 homologous antagonist/killer	0	0	0	0.95357	1.07137	1.08418	0.958429	-0.06859	0.0994533	0.11661	-0.0612567	0.38778	0.581037	0.258045	0.485394	3	3	3	3	3	3	3	3	17.6082	17.496	17.452	17.5492	17.4353	17.3659	17.4091	17.827	17.6733	17.831	17.5121	17.8645	17.9767	17.951	17.8311	18.0958	18.128	17.8848	17.6384	17.4782	17.5088	17.3692	17.5869
Banf1	O54962	O54962	Barrier-to-autointegration factor	0	0	0	0.891617	1.46699	1.04394	0.749062	-0.165503	0.552863	0.0620367	-0.416843	0.334403	0.23882	0.830516	0.00979082	3	3	3	3	3	3	3	3	17.9365	17.5315	17.9193	17.6273	17.7578	17.5057	17.3607	16.6887	16.0714	17.3149	17.4796	16.9847	17.4342	17.5551	16.8867	17.2939	17.687	17.0813	16.793	16.7944	16.5972	16.1908	16.3942
Bank1	Q80VH0	Q80VH0	B-cell scaffold protein with ankyrin repeats	0	0	0	0.729291	1.09781	0.852532	0.537325	-0.455433	0.134633	-0.230173	-0.896133	0.183837	0.757251	0.553997	0.383902	3	3	3	3	3	3	3	3	15.8292	16.5297	16.4223	15.5242	15.7448	16.1458	16.2333	16.089	15.2947	16.231	15.4442	16.3457	17.3343	16.2763	16.6104	16.2319	16.8263	16.4723	16.1738	16.2239	16.3041	13.5139	16.0925
Bap18	Q9DCT6	Q9DCT6	Chromatin complexes subunit BAP18	0	0	0	0.972255	1.12136	0.898406	0.710516	-0.0405933	0.165243	-0.15456	-0.49306	0.571621	0.268116	0.0810095	0.000766213	3	3	3	3	3	3	3	3	17.7802	17.6714	17.6335	17.6659	17.7334	17.5642	18.1232	18.2034	17.802	18.2342	18.258	18.132	18.1832	18.2897	18.0821	17.9995	18.0884	18.0034	17.9827	17.9262	18.045	17.4225	17.5643
Basp1	Q91XV3	Q91XV3	Brain acid soluble protein 1	0	0	0	0.986588	1.1756	0.923075	0.735253	-0.01948	0.2334	-0.11548	-0.443687	0.865021	0.201202	0.513351	0.0805908	3	3	3	3	3	3	3	3	21.1996	21.0343	20.8669	21.0634	20.9175	21.0614	22.9399	22.6377	23.1278	23.1023	23.2413	23.0619	23.2121	23.2411	22.7471	22.9219	22.9873	22.9446	22.547	22.7011	22.3498	22.4118	21.929
Bax	Q07813	Q07813	Apoptosis regulator BAX	0	0	0	0.978068	1.15734	1.19906	0.842676	-0.0319933	0.210807	0.261903	-0.24695	0.643167	0.0242121	0.0119739	0.114487	3	3	3	3	3	3	3	3	19.2447	19.1837	19.1719	19.2835	19.1378	19.0829	19.1082	19.2113	19.1786	19.4772	19.346	19.3074	19.6802	19.685	19.5932	19.8785	19.8484	20.0172	19.4364	19.3869	19.2164	19.3037	18.9727
Baz1b	Q9Z277	Q9Z277	Tyrosine-protein kinase BAZ1B	0	0	-1	0.953186	0.937671	0.857285	0.63802	-0.06917	-0.0928467	-0.222153	-0.648327	0.457001	0.086362	0.0137302	0.000194874	3	3	3	3	3	3	3	3	19.1132	19.0551	19.0467	19.1627	18.9481	18.8967	19.8551	19.7837	19.914	19.7901	19.7462	19.738	19.9143	19.9384	19.8135	19.6487	19.6141	19.737	19.5043	19.5896	19.4205	18.8474	18.8506
Bcam	Q9R069	Q9R069	Basal cell adhesion molecule	0	0	0	2.71853	0.845836	0.232265	0.835375	1.44283	-0.24155	-2.10615	-0.259503	0.128477	0.460014	0.0190073	0.274628	3	3	3	3	3	3	3	3	12.7578	13.1609	10.786	13.3476	13.7343	13.9513	15.0451	14.8715	15.5268	15.269	14.5045	14.9452	15.39	16.4001	16.0181	12.9136	14.1182	14.458	15.5728	15.1463	15.5323	15.4384	15.1256
Bcan	Q61361	Q61361	Brevican core protein	0	0	0	1.54644	0.97477	1.09696	0.359219	0.628953	-0.0368667	0.133513	-1.47706	0.332379	0.839635	0.314722	0.168299	3	3	3	3	3	3	3	3	16.4723	16.7974	18.2858	18.0497	17.728	17.6646	17.6192	17.9911	18.0883	18.0387	17.7206	17.8287	17.4314	17.5569	17.725	17.769	17.7978	17.547	17.6422	17.4609	16.6239	16.313	16.8329
Bcap29	Q61334	Q61334	B-cell receptor-associated protein 29	0	0	0	0.760793	0.979278	0.881299	1.49081	-0.394423	-0.03021	-0.182297	0.5761	0.135778	0.82361	0.540537	0.233793	3	3	3	3	3	3	3	3	12.6874	13.2614	12.8052	12.5237	12.3176	12.7295	15.1902	15.4888	15.3178	15.1183	15.4181	15.3698	15.0933	15.3611	15.1699	15.286	14.504	15.2874	12.6436	12.595	13.5972	13.2803	14.0218
Bcap31	Q61335	Q61335	B-cell receptor-associated protein 31	0	0	0	1.00194	0.978445	1.25012	1.27871	0.00279333	-0.0314367	0.322063	0.35469	0.940963	0.545692	0.0103555	0.0198989	3	3	3	3	3	3	3	3	18.2804	18.352	18.2533	18.2769	18.3375	18.2797	19.5979	19.5321	19.5257	19.594	19.5178	19.4496	19.8024	19.8832	19.7127	20.1694	20.1749	20.0202	18.8903	18.8634	18.8617	19.2529	19.3746
Bcas1	Q80YN3	Q80YN3	Breast carcinoma-amplified sequence 1 homolog	0	0	0	1.27253	0.162823	0.259739	0.596007	0.3477	-2.61863	-1.94487	-0.7466	0.351407	0.00197564	0.0715215	0.0592415	3	3	3	3	3	3	3	3	15.4146	15.7128	15.6976	15.3826	16.0154	16.4702	20.4208	20.1374	20.7365	18.36	17.2514	17.8274	19.2788	18.0328	20.1089	17.9787	17.4037	16.2035	17.3876	17.0204	17.8561	16.6072	16.4515
Bcas2	Q9D287	Q9D287	Pre-mRNA-splicing factor SPF27	0	0	0	1.11771	1.37439	1.14745	1.20878	0.160543	0.458797	0.198433	0.273553	0.196134	0.0219771	0.336585	0.0407101	3	3	3	3	3	3	3	3	15.7515	15.9609	15.6333	15.9577	16.0018	15.8678	16.6208	16.7015	16.3016	16.9435	17.0522	17.0046	17.1883	17.1003	16.9193	17.5409	17.2875	16.9747	16.5897	16.871	16.6828	17.0082	17.0445
Bcas3	Q8CCN5	Q8CCN5	Breast carcinoma-amplified sequence 3 homolog	0	0	0	1.05268	0.915385	0.794697	0.782508	0.0740667	-0.12755	-0.331523	-0.353823	0.605092	0.326463	0.0796313	0.122873	3	3	3	3	3	3	3	3	15.532	15.2353	15.1699	15.247	15.4797	15.4328	16.7644	16.7481	17.0671	16.6455	16.7413	16.8101	17.4722	17.2493	17.6734	16.9909	17.1943	17.2152	17.0457	16.8697	16.8245	16.8953	16.4136
Bcat1	P24288	P24288	Branched-chain-amino-acid aminotransferase, cytosolic	0	0	0	1.20687	0.228051	0.452946	0.765309	0.27127	-2.13257	-1.14259	-0.385887	0.252888	0.0191423	0.17006	0.182982	3	3	3	3	3	3	3	3	14.1672	13.9469	14.5281	14.3127	14.4471	14.6962	17.8539	17.3284	18.2526	16.6523	15.0485	15.3363	17.1083	15.9823	18.1825	16.1845	16.2185	15.4424	15.9133	15.7783	16.1714	15.3815	15.3355
Bcat2	O35855	O35855	Branched-chain-amino-acid aminotransferase, mitochondrial	0	0	0	0.957384	1.12559	1.25653	1.14612	-0.06283	0.170677	0.329447	0.196753	0.264123	0.000243721	0.00403544	0.0315351	3	3	3	3	3	3	3	3	18.1605	18.2635	18.3209	18.2	18.1946	18.1618	19.0128	19.0132	19.0476	19.1911	19.1847	19.2098	19.2098	19.2133	19.0871	19.5451	19.5268	19.4266	18.7928	18.8975	18.7958	18.9269	19.0609
Bccip	Q9CWI3	Q9CWI3	BRCA2 and CDKN1A-interacting protein	0	0	0	1.01693	1.27144	1.26309	0.961967	0.02422	0.34646	0.33696	-0.05594	0.80661	0.0200892	0.329403	0.836704	3	3	3	3	3	3	3	3	15.0845	14.9376	14.8994	15.0308	15.1056	14.8577	15.3551	15.4572	15.3156	15.6436	15.8872	15.6365	16.0278	16.2558	15.3342	15.9613	16.325	16.3424	15.0755	15.2399	15.3009	15.6112	14.775
Bckdha	P50136	P50136	2-oxoisovalerate dehydrogenase subunit alpha, mitochondrial	0	0	0	1.15388	0.543458	0.815451	1.18314	0.206493	-0.87976	-0.29433	0.242627	0.209839	0.00313822	0.241884	0.207571	3	3	3	3	3	3	3	3	14.6941	15.0033	14.5349	14.9708	14.96	14.9209	16.6683	16.6009	16.9245	15.9666	15.9294	15.6584	16.4366	16.2562	16.9065	16.235	16.3997	16.0817	16.207	15.8111	15.9837	16.2799	16.0302
Bckdhb	Q6P3A8	Q6P3A8	2-oxoisovalerate dehydrogenase subunit beta, mitochondrial	0	0	0	1.10295	0.605892	0.776117	0.805215	0.141363	-0.722867	-0.365653	-0.312553	0.0887703	0.00570254	0.0885736	0.0675713	3	3	3	3	3	3	3	3	15.7753	15.6244	15.6403	15.8869	15.7454	15.8319	17.0266	16.911	17.2032	16.5214	16.171	16.2798	16.8985	16.7128	17.1815	16.4379	16.7386	16.5192	16.147	16.4118	16.1314	16.0702	15.7704
Bckdk	O55028	O55028	[3-methyl-2-oxobutanoate dehydrogenase [lipoamide]] kinase, mitochondrial	0	0	0	1.15716	1.19259	1.07585	1.27158	0.210583	0.254093	0.105473	0.346627	0.28339	0.121116	0.245107	0.193244	3	3	3	3	3	3	3	3	17.5845	17.9504	17.6242	17.7041	18.1334	17.9534	18.392	18.3241	18.2251	18.6753	18.7	18.3282	18.8534	18.7993	18.6746	18.9767	18.7808	18.8862	18.0174	18.1441	17.8254	17.9407	18.5121
Bcl10	Q9Z0H7	Q9Z0H7	B-cell lymphoma/leukemia 10	0	0	0	1.09464	1.07515	0.987694	1.17919	0.13045	0.104537	-0.0178633	0.237793	0.461877	0.434143	0.893405	0.125724	3	3	3	3	3	3	3	3	16.5532	16.3274	16.3873	16.8416	16.3751	16.4425	16.8082	17.2121	16.9402	17.1236	17.0586	17.0919	16.992	17.3551	17.0539	17.1012	17.2185	17.0278	16.647	16.5368	16.712	17.0359	16.6564
Bcl11b	Q99PV8	Q99PV8	B-cell lymphoma/leukemia 11B	0	0	0	1.86797	0.685486	2.32496	NaN	0.90147	-0.5448	1.2172	NaN	NaN	NaN	NaN	NaN	2	2	1	1	1	2	2	0	10.8172	13.2877	NaN	NaN	13.3375	12.5704	NaN	17.4244	NaN	NaN	NaN	16.8796	NaN	NaN	13.5654	13.2776	NaN	16.2875	13.4312	NaN	16.8338	NaN	NaN
Bcl2l1	Q64373	Q64373	Bcl-2-like protein 1	0	0	0	1.05578	1.07997	1.09717	1.29863	0.0783033	0.110993	0.133783	0.376987	0.0800361	0.19199	0.219043	0.0170574	3	3	3	3	3	3	3	3	17.07	17.0328	17.0003	17.1658	17.0924	17.0797	17.5276	17.6345	17.7031	17.8307	17.6794	17.688	17.8682	17.8626	17.7046	18.0055	18.034	17.7973	17.2491	17.1944	16.975	17.4257	17.5802
Bcl2l13	P59017	P59017	Bcl-2-like protein 13	0	0	0	0.972082	0.883505	0.768143	0.70131	-0.04085	-0.17869	-0.380553	-0.511877	0.730441	0.227182	0.000517243	0.00612396	3	3	3	3	3	3	3	3	16.3817	16.6455	16.7186	16.6247	16.4957	16.5029	17.6724	17.7862	17.9009	17.7422	17.6839	17.3973	17.7001	17.6216	17.6648	17.3362	17.2347	17.274	16.6667	16.4913	16.4621	16.1226	15.8853
Bcl7b	Q921K9	Q921K9	B-cell CLL/lymphoma 7 protein family member B	0	0	0	1.05571	0.940407	0.884075	0.838041	0.07821	-0.0886433	-0.17776	-0.254907	0.70913	0.618046	0.0608091	0.342412	3	3	3	3	3	3	3	3	15.8583	15.9839	15.7939	15.5833	16.1599	16.1275	17.4769	17.1258	16.9592	17.1545	17.1643	16.9771	17.6102	17.5018	17.4686	17.2495	17.3636	17.4341	17.243	17.2488	17.077	17.1436	17.1853
Bclaf1	Q8K019	Q8K019	Bcl-2-associated transcription factor 1	0	0	0	0.990743	1.23282	1.37232	1.28244	-0.0134167	0.301967	0.45662	0.35889	0.94256	0.0343784	0.0606161	0.00073183	3	3	3	3	3	3	3	3	17.4315	17.4022	17.0124	17.3577	17.4005	17.0476	18.4917	18.7827	18.5712	18.9667	18.9473	18.8374	18.6958	18.6235	18.5455	19.3029	19.1887	18.7431	18.1414	18.2056	18.1905	18.5156	18.4952
Bco2	Q99NF1	Q99NF1	Beta,beta-carotene 9',10'-oxygenase	0	0	0	1.0102	1.01138	0.737821	0.721829	0.01464	0.0163267	-0.438657	-0.47027	0.921615	0.870148	0.00798311	0.00275129	3	3	3	3	3	3	3	3	16.7655	16.8245	16.5032	16.8611	16.5251	16.7509	16.8054	16.9518	16.9365	16.8465	17.0762	16.8199	16.9551	17.1407	16.9525	16.5363	16.493	16.703	16.3277	16.0916	16.2461	15.7493	15.7829
Bcs1l	Q9CZP5	Q9CZP5	Mitochondrial chaperone BCS1	0	0	0	1.07488	0.633543	0.634408	0.910005	0.10418	-0.658487	-0.656517	-0.136053	0.534095	0.0306692	0.0323493	0.356339	3	3	3	3	3	3	3	3	16.2606	15.7771	16.1296	16.2564	16.08	16.1433	18.0824	17.5772	18.1251	17.4624	17.1484	17.1983	17.802	17.4181	18.085	17.0221	17.0744	17.2392	17.4495	17.4615	17.1586	17.0526	17.2801
Bdh1	Q80XN0	Q80XN0	D-beta-hydroxybutyrate dehydrogenase, mitochondrial	0	0	0	1.34852	0.235583	0.428177	0.651077	0.43138	-2.08569	-1.22372	-0.6191	0.00686125	0.00320902	0.106756	0.0906081	3	3	3	3	3	3	3	3	17.7006	17.5985	17.6909	17.9603	18.0946	18.2293	19.904	19.6571	20.4787	18.26	17.504	18.0187	18.9884	18.1726	20.0501	18.2313	17.8717	17.437	17.3685	17.1127	17.9482	16.8701	16.6275
Becn1	O88597	O88597	Beclin-1	0	0	0	1.03488	1.10275	1.21607	1.06536	0.0494667	0.141107	0.28223	0.0913467	0.0967857	0.0819485	0.0104784	0.528805	3	3	3	3	3	3	3	3	15.8563	15.7906	15.8418	15.9015	15.8685	15.8672	17.2175	17.3974	17.298	17.4801	17.3815	17.4746	17.584	17.7133	17.5179	17.9203	17.9005	17.841	17.0929	17.2736	17.1631	17.0543	17.2733
Bet1	O35623	O35623	BET1 homolog	0	0	0	1.00077	0.680869	1.79219	1.29964	0.00110333	-0.554552	0.841725	0.378113	0.98777	NaN	NaN	0.121064	3	3	3	2	2	3	3	3	15.4451	15.5285	15.4095	15.5156	15.524	15.3468	15.4395	15.6886	15.044	NaN	15.0245	14.6479	NaN	14.9497	16.1135	15.808	16.5922	16.7198	14.9256	15.1514	15.3976	15.7408	15.2786
Bicd2	Q921C5	Q921C5	Protein bicaudal D homolog 2	0	0	0	0.65851	0.930516	1.17951	0.947042	-0.602723	-0.103897	0.238183	-0.0785	0.382287	0.269078	0.216207	0.87613	3	3	3	3	3	3	3	3	16.4013	18.1244	16.6623	15.8664	16.8373	16.6761	19.3467	19.5824	19.4017	19.3355	19.4087	19.2749	19.075	19.5357	19.0682	19.4003	19.432	19.5611	18.5638	19.142	18.3291	17.7883	18.9731
Bid	P70444	P70444	BH3-interacting domain death agonist	0	0	-1	0.965925	0.967951	0.833794	0.424475	-0.0500167	-0.0469933	-0.262237	-1.23625	0.223204	0.609481	0.181545	9.43164e-05	3	3	3	3	3	3	3	3	17.5754	17.464	17.5097	17.4855	17.4424	17.471	17.66	17.7971	17.5172	17.5995	17.6609	17.5729	18.0697	18.1929	17.8692	17.568	17.7539	18.0232	17.3982	17.5495	17.4148	16.2252	16.1071
Bin1	O08539	O08539	Myc box-dependent-interacting protein 1	0	0	-1	0.948763	1.03269	0.735775	0.39595	-0.07588	0.04641	-0.442663	-1.33661	0.39343	0.708374	0.0762196	0.000284987	3	3	3	3	3	3	3	3	20.9891	20.8043	20.9472	20.9492	20.7677	20.796	21.0782	21.3332	20.9567	21.1551	21.1217	21.2305	21.8422	21.8406	21.3351	21.1481	21.1545	21.3873	21.3576	21.3012	21.1064	20.0811	19.8612
Bin2	D3Z6Q9	D3Z6Q9	Bridging integrator 2	0	-1	0	0.971263	0.969922	0.692016	0.426996	-0.0420667	-0.04406	-0.531123	-1.22771	0.0854605	0.561669	0.0109086	2.72473e-05	3	3	3	3	3	3	3	3	21.6001	21.5891	21.5493	21.5492	21.5171	21.5461	22.3548	22.5264	22.3105	22.3159	22.3949	22.3487	22.8026	22.9092	22.6535	22.1819	22.1494	22.4407	22.438	22.3345	22.4132	21.2232	21.0729
Birc6	O88738	O88738	Baculoviral IAP repeat-containing protein 6	0	0	0	1.16277	1.0471	1.17118	1.06788	0.217567	0.0664	0.227957	0.0947433	0.00744934	0.597866	0.264086	0.294546	3	3	3	3	3	3	3	3	14.6631	14.5976	14.5593	14.8162	14.7747	14.8817	16.1322	16.0609	15.9428	15.9233	16.274	16.1377	16.374	16.4771	16.0819	16.7308	16.5944	16.2917	16.039	16.044	15.8708	16.1563	16.1069
Bles03	Q8VD62	Q8VD62	UPF0696 protein C11orf68 homolog	0	0	0	0.958976	1.06978	1.06631	1.22784	-0.0604333	0.0973133	0.09263	0.296127	0.358339	0.185473	0.386355	0.0168475	3	3	3	3	3	3	3	3	17.526	17.6153	17.6446	17.6156	17.5331	17.456	18.0018	18.1934	18.1274	18.1951	18.1698	18.2496	18.3067	18.348	18.3018	18.5088	18.5025	18.223	17.7617	17.5809	17.7452	17.9218	18.0836
Blmh	Q8R016	Q8R016	Bleomycin hydrolase	0	0	0	0.941689	0.985044	1.05042	0.981688	-0.0866767	-0.02174	0.0709667	-0.0266633	0.0373367	0.775524	0.277218	0.769438	3	3	3	3	3	3	3	3	20.4445	20.4099	20.4747	20.3778	20.3771	20.3141	20.8422	20.7497	20.9666	20.8979	20.8038	20.7916	20.7613	20.891	20.9015	20.9626	20.8547	20.9495	20.4195	20.4429	20.3452	20.4133	20.4914
Blnk	Q9QUN3	Q9QUN3	B-cell linker protein	0	0	0	1.07456	0.846888	0.958358	0.676751	0.103747	-0.239757	-0.0613633	-0.563303	0.342156	0.000600854	0.362331	0.00136072	3	3	3	3	3	3	3	3	17.389	17.3891	17.1566	17.3022	17.4568	17.4871	18.7712	18.7912	18.844	18.5689	18.5776	18.5407	19.333	19.4667	19.3547	19.2853	19.2756	19.4093	19.0152	18.9938	18.877	18.5116	18.3436
Bloc1s1	O55102	O55102	Biogenesis of lysosome-related organelles complex 1 subunit 1	0	0	0	0.919741	1.30076	1.25999	1.07746	-0.1207	0.37935	0.33341	0.107633	0.116035	0.121365	0.3138	0.410447	3	3	3	3	3	3	3	3	16.6569	16.6532	16.7882	16.6347	16.6024	16.4991	17.1321	16.983	16.528	17.2494	17.3804	17.1514	17.2774	17.4265	16.5697	17.4568	17.6118	17.2052	16.5868	16.7221	16.7267	16.8996	16.8883
Bloc1s2	Q9CWG9	Q9CWG9	Biogenesis of lysosome-related organelles complex 1 subunit 2	0	0	0	1.03498	1.31637	1.25017	1.33723	0.0496067	0.39657	0.322127	0.419247	0.711662	0.0196667	0.138533	0.00115595	3	3	3	3	3	3	3	3	16.0046	15.9751	15.7535	16.149	15.8291	15.9039	16.5078	16.6387	16.3108	16.8615	16.8173	16.9683	17.1384	17.0094	16.8584	17.4133	17.536	17.0233	16.9208	17.0819	16.9612	17.3906	17.4365
Bloc1s3	Q5U5M8	Q5U5M8	Biogenesis of lysosome-related organelles complex 1 subunit 3	0	0	0	0.991987	0.879137	1.28886	0.970038	-0.0116067	-0.18584	0.366097	-0.0438867	0.860327	0.593097	0.142373	0.752723	3	3	3	3	3	3	3	3	15.6585	15.6392	15.5317	15.676	15.607	15.5116	14.8588	15.1627	15.268	15.5025	14.5981	14.6314	15.0388	15.2368	15.6753	15.5761	15.657	15.816	15.5206	15.5604	15.4449	15.6191	15.5591
Bloc1s4	Q8VED2	Q8VED2	Biogenesis of lysosome-related organelles complex 1 subunit 4	0	0	0	1.05639	1.39828	1.36378	1.56723	0.07914	0.483657	0.447607	0.648213	0.636366	0.000114328	0.0239686	0.000392682	3	3	3	3	3	3	3	3	15.9633	15.8552	16.1041	16.3244	15.9544	15.8813	16.3751	16.4681	16.3759	16.8972	16.8719	16.9011	16.926	17.1041	16.8374	17.4676	17.5337	17.209	16.6234	16.5197	16.4384	17.1826	17.2148
Bloc1s5	Q8R015	Q8R015	Biogenesis of lysosome-related organelles complex 1 subunit 5	0	0	0	0.962508	1.25908	1.45052	1.62138	-0.05513	0.332373	0.536573	0.697227	0.614123	0.145823	0.0374045	0.00495404	3	3	3	3	3	3	3	3	15.4706	15.4779	15.711	15.6222	15.4179	15.4539	17.0034	16.5649	16.595	17.1858	17.1572	16.8173	16.6642	16.4097	16.2929	17.1872	17.0597	16.7296	16.1789	16.343	16.3145	17.1906	16.9324
Bloc1s6	Q9R0C0	Q9R0C0	Biogenesis of lysosome-related organelles complex 1 subunit 6	0	0	0	0.866059	1.08677	1.27697	1.97392	-0.207463	0.120047	0.35273	0.981063	0.211253	0.276468	0.0265982	0.0353622	3	3	3	3	3	3	3	3	16.6716	16.5882	16.8643	16.2797	16.6532	16.5689	15.7491	15.8841	15.9639	16.1289	15.903	15.9254	16.0745	16.2529	15.9529	16.5456	16.4362	16.3567	15.2777	15.4906	14.8858	15.8769	16.0084
Blvra	Q9CY64	Q9CY64	Biliverdin reductase A	0	0	0	0.91834	1.05638	1.05191	1.24658	-0.1229	0.0791267	0.0730067	0.31798	0.145414	0.0300846	0.284151	0.00581168	3	3	3	3	3	3	3	3	20.2533	20.2417	20.3042	20.2719	20.1002	20.0583	21.0167	21.0449	20.9963	21.0687	21.135	21.0917	21.0114	21.1778	21.0974	21.189	21.2152	21.1014	20.8553	20.8849	20.9117	21.1216	21.312
Blvrb	Q923D2	Q923D2	Flavin reductase (NADPH)	0	0	-1	0.9283	1.02489	0.750949	0.617952	-0.107337	0.0354733	-0.413213	-0.694433	0.416337	0.843968	0.0192556	0.011076	3	3	3	3	3	3	3	3	19.7619	19.5946	19.7545	19.8009	19.5368	19.4513	19.6934	19.5035	19.366	19.835	19.4379	19.3964	19.7532	19.5779	19.396	19.1217	19.1329	19.2329	19.4286	19.4829	19.0472	18.5407	18.7708
Bmp2k	Q91Z96	Q91Z96	BMP-2-inducible protein kinase	0	0	0	1.06826	1.69039	1.26496	1.29798	0.0952567	0.757357	0.33909	0.37627	0.168019	0.00124876	0.10778	0.0295016	3	3	3	3	3	3	3	3	16.9856	17.0896	16.9276	17.089	17.0464	17.1532	17.2626	16.9586	17.0274	17.8271	17.8702	17.8234	17.7644	17.9499	17.5821	18.2345	18.2251	17.8542	17.7297	17.5107	17.4187	18.0035	17.987
Bmpr2	O35607	O35607	Bone morphogenetic protein receptor type-2	0	0	0	1.03865	0.71368	0.841773	1.40074	0.05471	-0.48665	-0.248497	0.48619	0.686803	0.287724	0.602681	0.243864	3	3	3	3	3	3	3	3	13.7139	13.424	13.595	13.446	13.7042	13.7468	15.498	15.158	15.664	15.6562	14.4115	14.7923	14.4526	15.4695	14.9207	15.3534	14.3317	14.4122	15.4533	15.2498	14.3297	15.654	15.4777
Bnc1	O35914	O35914	Zinc finger protein basonuclin-1	0	0	0	0.781396	1.76986	2.85058	5.47981	-0.355873	0.823633	1.51125	2.45413	0.427288	0.0070124	0.0175137	0.000137041	3	3	3	3	3	3	3	3	16.7201	17.3573	16.3503	16.8234	15.914	16.6227	16.4557	16.5434	16.228	16.9701	17.3496	17.3784	16.3738	16.5297	16.1817	18.0707	18.3989	17.1494	16.1437	16.3122	16.2968	18.5088	18.5791
Bnip1	Q6QD59	Q6QD59	Vesicle transport protein SEC20	0	0	0	1.25126	1.07683	1.0389	1.04533	0.323387	0.106793	0.05505	0.0639567	0.393517	0.335245	0.376657	0.711625	3	3	3	3	3	3	3	3	15.2631	15.9148	16.4082	16.1985	16.0615	16.2963	17.9229	18.2188	18.0758	18.0861	18.2135	18.2382	18.302	18.3385	18.1772	18.3245	18.3744	18.284	17.7999	17.6818	17.7365	17.4937	18.0077
Bnip2	O54940	O54940	BCL2/adenovirus E1B 19 kDa protein-interacting protein 2	0	0	0	0.946248	0.920545	0.827719	0.879017	-0.07971	-0.11944	-0.272787	-0.186037	0.10805	0.297949	0.00360467	0.114666	3	3	3	3	3	3	3	3	15.6066	15.6399	15.6662	15.5696	15.493	15.611	16.763	16.8157	16.9981	16.6366	16.7086	16.8734	17.0182	17.0923	17.1615	16.7922	16.8487	16.8128	16.5007	16.4544	16.3135	16.3514	16.1
Bnip3l	Q9Z2F7	Q9Z2F7	BCL2/adenovirus E1B 19 kDa protein-interacting protein 3-like	0	0	0	1.94183	1.10316	1.02639	1.49359	0.957417	0.141647	0.0375733	0.57878	0.0102411	0.573245	0.832413	0.119274	3	3	3	3	3	3	3	3	14.5148	14.1752	13.8851	15.155	15.3255	14.9669	15.5915	16.3461	15.882	16.0948	15.951	16.1987	16.3416	16.2413	16.6683	16.3788	16.3225	16.6625	15.2943	15.1969	14.8724	16.1673	15.255
Bod1l	E9Q6J5	E9Q6J5	Biorientation of chromosomes in cell division protein 1-like 1	0	0	0	0.863864	1.21549	1.13929	1.76627	-0.211123	0.281533	0.18813	0.820703	0.469661	0.108849	0.0707075	0.0793843	3	3	3	3	3	3	3	3	12.8687	13.0183	12.479	12.1672	12.862	12.7034	14.057	14.4605	14.0933	14.577	14.4325	14.4458	14.3343	14.5213	14.2682	14.5484	14.5887	14.5511	13.3835	13.436	13.6766	14.997	13.9652
Bola1	Q9D8S9	Q9D8S9	BolA-like protein 1	0	0	0	0.903567	1.17625	1.16057	1.02878	-0.146297	0.23419	0.21483	0.04093	0.230725	0.339324	0.220143	0.894827	3	3	3	3	3	3	3	3	17.3253	17.1078	17.4081	17.2351	17.1058	17.0615	17.3439	17.1389	16.872	17.6854	17.1566	17.2155	17.4012	17.2591	17.0918	17.5619	17.6036	17.231	17.2719	17.4409	17.0072	17.804	17.041
Bola2	Q8BGS2	Q8BGS2	BolA-like protein 2	1	0	0	1.21807	1.59237	3.29267	2.65983	0.284593	0.671173	1.71926	1.41134	0.343575	0.00652204	0.000889611	0.000315894	3	3	3	3	3	3	3	3	15.7836	15.623	15.8598	16.5261	15.9355	15.6587	16.4676	16.3872	16.1374	17.0917	16.8374	17.0767	16.1447	16.1118	15.5932	17.7415	17.7467	17.5193	16.5035	16.6115	16.2515	17.7795	17.9782
Bola3	Q8CEI1	Q8CEI1	BolA-like protein 3	0	0	0	1.6846	1.43642	0.921617	1.5755	0.752407	0.522477	-0.11776	0.65581	NaN	0.522168	0.808829	0.190478	2	3	3	3	3	3	3	3	13.5308	11.971	NaN	13.5619	13.5431	13.4049	14.9887	14.5336	14.8679	14.0518	15.3139	16.5919	13.9876	13.0487	14.4997	14.0571	13.559	13.5666	14.4225	14.2598	13.1089	14.6734	14.4987
Bop1	P97452	P97452	Ribosome biogenesis protein BOP1	0	0	0	1.12619	1.10268	1.10256	0.477549	0.171453	0.141013	0.14086	-1.06628	0.678361	0.532962	0.663831	0.209199	3	3	3	3	3	3	3	3	14.3494	14.0935	13.4488	13.6078	14.5343	14.2639	14.4938	14.2468	14.294	14.6241	14.7281	14.1055	14.2302	15.03	14.7438	14.5687	14.6765	15.1814	14.1851	16.3698	14.5384	13.5739	14.3498
Borcs5	Q9D920	Q9D920	BLOC-1-related complex subunit 5	0	0	-1	0.992455	1.23279	0.997552	0.559176	-0.0109267	0.301927	-0.00353667	-0.838627	0.833187	0.0144328	0.978492	0.000393434	3	3	3	3	3	3	3	3	16.4862	16.4638	16.4657	16.5546	16.4331	16.3953	17.2936	17.3273	17.0981	17.5266	17.5267	17.5716	17.7078	17.6989	17.3661	17.4863	17.641	17.6349	17.3746	17.3127	17.2086	16.5687	16.365
Borcs6	Q9D6W8	Q9D6W8	BLOC-1-related complex subunit 6	0	0	-1	0.975987	1.33469	0.95279	0.490658	-0.0350667	0.4165	-0.06977	-1.02721	0.5358	0.0191552	0.601013	0.0337169	3	3	3	3	3	3	3	3	15.8191	15.8769	15.9002	15.9109	15.828	15.7521	16.6768	16.9903	16.7212	17.1156	17.2447	17.2774	17.213	17.3026	16.9775	16.9471	17.138	17.1986	17.0699	17.017	16.8612	15.3234	16.2197
Borcs7	Q9CRC6	Q9CRC6	BLOC-1-related complex subunit 7	0	0	0	0.856327	1.20858	1.29	1.12647	-0.223767	0.27331	0.36737	0.171803	0.302478	0.336684	0.0496841	0.203811	3	3	3	3	3	3	3	3	15.017	14.4696	14.775	14.7357	14.4492	14.4055	15.894	15.1902	15.5481	16.0982	15.7502	15.6038	15.3214	14.9938	15.4215	15.6093	15.6619	15.5677	15.3314	15.3955	15.1103	15.558	15.4836
Bpgm	P15327	P15327	Bisphosphoglycerate mutase	0	0	0	0.568674	0.573636	0.52237	1.33252	-0.814327	-0.801793	-0.936857	0.414157	0.131061	0.29001	0.047978	0.548159	3	3	3	3	3	3	3	3	16.7903	17.9414	16.6182	16.4852	16.1033	16.3183	19.4928	18.7696	19.2636	19.597	17.9616	17.562	18.597	18.4379	19.1558	18.2678	17.4118	17.7005	18.4566	18.2072	17.4896	17.3583	19.1857
Bphl	Q8R164	Q8R164	Valacyclovir hydrolase	0	0	0	1.02751	0.694908	0.848306	0.880375	0.0391567	-0.525107	-0.237343	-0.18381	0.342044	0.00430922	0.0480943	0.164107	3	3	3	3	3	3	3	3	18.91	18.8923	18.9509	19.0208	18.9241	18.9259	20.18	20.0773	20.278	19.791	19.5787	19.5903	20.0191	19.8775	20.1372	19.7008	19.8309	19.7902	18.9122	18.9506	18.8133	18.7286	18.8703
Bpnt1	Q9Z0S1	Q9Z0S1	3'(2'),5'-bisphosphate nucleotidase 1	0	0	0	0.937599	0.877745	0.830343	0.681776	-0.0929567	-0.188127	-0.26822	-0.55263	0.0449595	0.0528522	0.0328754	0.0010627	3	3	3	3	3	3	3	3	18.4601	18.4138	18.5132	18.3825	18.3857	18.3401	19.4019	19.2315	19.3917	19.2102	19.1779	19.0725	19.2957	19.3107	19.4332	18.9899	19.025	19.2201	18.8765	19.0144	18.8785	18.4626	18.3124
Braf	P28028	P28028	Serine/threonine-protein kinase B-raf	0	0	0	0.977921	0.748394	1.02785	1.38438	-0.03221	-0.41813	0.0396367	0.469243	0.912551	0.187629	0.920816	0.309119	3	3	3	3	3	3	3	3	14.2454	13.7004	14.4728	13.9346	14.4121	13.9752	14.7883	14.7705	15.3183	14.902	14.2443	14.4764	14.4459	14.5791	15.5118	14.5677	14.955	15.133	14.3452	14.2129	14.1239	15.4891	14.2367
Brap	Q99MP8	Q99MP8	BRCA1-associated protein	0	0	0	1.02205	1.20035	1.10881	0.980423	0.03147	0.263457	0.149017	-0.0285233	0.785468	0.00964918	0.244736	0.776153	3	3	3	3	3	3	3	3	14.951	15.0048	14.6596	14.9151	14.9189	14.8757	15.926	16.0991	15.9495	16.2859	16.23	16.2491	16.4651	16.4547	16.1391	16.4705	16.4893	16.5461	15.8431	16.0038	15.8912	16.0443	15.8226
Brat1	Q8C3R1	Q8C3R1	BRCA1-associated ATM activator 1	0	0	0	1.07579	1.32207	1.10901	0.906574	0.105393	0.402797	0.149267	-0.141503	0.610071	0.0519746	0.305594	0.449109	3	3	3	3	3	3	3	3	13.8741	13.622	13.747	13.7973	14.1826	13.5794	13.224	13.068	13.2984	13.4631	13.4752	13.8605	14.1046	14.1276	13.8228	14.2886	14.2005	14.0137	13.7805	14.026	14.1621	14.0865	13.8027
Brcc3	P46737	P46737	Lys-63-specific deubiquitinase BRCC36	0	0	0	1.00931	1.15577	1.13356	1.13541	0.0133633	0.208857	0.180867	0.183213	0.88198	0.01101	0.122525	0.113091	3	3	3	3	3	3	3	3	17.8896	17.7111	17.6515	17.8446	17.7585	17.6892	18.7163	18.8086	18.6681	18.9467	18.9738	18.899	19.2029	19.1998	18.9375	19.2376	19.3333	19.3118	18.6236	18.7283	18.658	18.9822	18.6924
Brd2	Q7JJ13	Q7JJ13	Bromodomain-containing protein 2	0	0	0	0.990302	0.845326	0.4549	0.385268	-0.01406	-0.24242	-1.13638	-1.37607	0.957961	0.280242	0.000188512	0.00119878	3	3	3	3	3	3	3	3	13.8204	14.3765	13.7542	13.67	14.1856	14.0533	16.0455	16.0854	15.5815	15.4467	15.7807	15.7577	15.8899	16.0873	15.9399	14.7203	14.9335	14.8541	15.2436	15.4806	15.3305	14.2807	13.8232
Brd3	Q8K2F0	Q8K2F0	Bromodomain-containing protein 3	0	0	0	0.915804	0.998894	0.807287	0.663102	-0.12689	-0.00159667	-0.308847	-0.592697	0.247659	0.990753	0.0278377	0.00685095	3	3	3	3	3	3	3	3	14.5772	14.7591	14.561	14.3674	14.5783	14.5709	16.3487	16.1567	15.9658	16.1696	16.2646	16.0322	15.8198	15.8091	15.6655	15.3057	15.5045	15.5578	14.933	15.1947	15.2343	14.4986	14.6551
Brd4	Q9ESU6	Q9ESU6	Bromodomain-containing protein 4	0	0	0	0.976454	0.997211	0.812037	0.647589	-0.0343767	-0.00403	-0.300383	-0.62685	0.802654	0.948387	0.0205991	0.00135353	3	3	3	3	3	3	3	3	17.2691	17.3167	16.9762	17.0492	17.2923	17.1173	17.906	18.0519	17.9564	17.9097	18.044	17.9484	18.198	18.1972	17.9632	17.7816	17.854	17.8217	17.8037	17.9075	17.7971	17.3154	17.0765
Bre	Q8K3W0	Q8K3W0	BRCA1-A complex subunit BRE	0	0	0	0.857018	1.18484	1.09233	0.998329	-0.222603	0.244693	0.127413	-0.00241333	0.182226	0.0384421	0.222447	0.984631	3	3	3	3	3	3	3	3	16.862	16.8779	16.9151	16.3904	16.7671	16.8297	17.4949	17.693	17.4979	17.7412	17.8973	17.7814	17.9772	17.9601	17.7267	17.9484	18.0696	18.0282	17.5313	17.4419	17.412	17.655	17.2665
Bri3	P28662	P28662	Brain protein I3	0	0	0	1.02535	0.922883	1.07563	0.657929	0.0361167	-0.11578	0.105187	-0.603997	0.638716	0.663238	0.733599	0.00297949	3	3	3	3	3	3	3	3	15.6138	15.567	15.471	15.6911	15.4928	15.5762	16.5199	16.2437	15.7509	15.9148	16.0002	16.2522	16.8098	16.9005	16.0068	16.653	16.7721	16.6077	17.294	17.1718	17.1089	16.5838	16.7216
Bri3bp	Q8BXV2	Q8BXV2	BRI3-binding protein	0	0	1	1.06721	1.54635	1.62233	1.90343	0.0938467	0.62887	0.69807	0.928603	0.186413	0.21227	0.0439923	0.0432947	3	3	3	3	3	3	3	3	16.2369	16.2208	16.2091	16.2447	16.2718	16.4318	16.6641	17.2801	15.899	17.4713	16.9813	17.2772	17.4765	17.3966	17.284	18.4322	18.1799	17.6392	16.8613	16.2392	16.8776	17.4505	18.0529
Brix1	Q9DCA5	Q9DCA5	Ribosome biogenesis protein BRX1 homolog	0	1	0	4.84664	1.46492	1.63883	1.86339	2.27698	0.550823	0.712667	0.89793	0.20412	0.0998203	0.000487152	0.000912289	3	3	3	3	3	3	3	3	12.4003	12.3654	7.96535	13.2196	13.6835	12.659	14.1123	13.7323	14.069	14.6113	14.8657	14.0892	14.9183	14.8828	14.9693	15.7009	15.6992	15.5083	14.4289	14.574	14.6732	15.4825	15.5682
Brk1	Q91VR8	Q91VR8	Protein BRICK1	0	0	-1	0.967404	1.12965	0.873264	0.585433	-0.04781	0.17588	-0.19551	-0.772423	0.789713	0.184467	0.344978	0.0487456	3	3	3	3	3	3	3	3	19.42	19.1348	19.5184	19.5535	19.1741	19.2022	19.9124	19.8067	19.6123	19.8358	20.0636	19.9596	19.8013	19.7621	19.2867	19.3914	19.5683	19.3038	18.7076	18.6554	18.4355	17.3626	18.2725
Brox	Q8K2Q7	Q8K2Q7	BRO1 domain-containing protein BROX	0	0	0	0.882811	1.22466	1.27312	1.12792	-0.179823	0.29238	0.34837	0.173667	0.094838	0.00271021	0.00161304	0.185773	3	3	3	3	3	3	3	3	17.9345	17.8666	18.0766	17.8879	17.7147	17.7355	18.302	18.4096	18.3153	18.6212	18.5936	18.6892	18.7886	18.8121	18.6722	19.1287	19.1123	19.0769	18.4102	18.293	18.0997	18.5349	18.3283
Brsk1	Q5RJI5	Q5RJI5	Serine/threonine-protein kinase BRSK1	0	0	0	NaN	0.276228	0.279396	NaN	NaN	-1.85607	-1.83962	NaN	NaN	NaN	NaN	NaN	0	0	3	1	2	1	1	0	NaN	NaN	NaN	NaN	NaN	NaN	14.6156	14.4269	14.8546	NaN	NaN	12.7763	13.8297	NaN	15.353	12.7517	NaN	NaN	NaN	NaN	12.6822	NaN	NaN
Brsk2	Q69Z98	Q69Z98	Serine/threonine-protein kinase BRSK2	0	0	0	NaN	0.33043	0.354397	1.23172	NaN	-1.59758	-1.49656	0.30068	NaN	0.00290167	NaN	NaN	0	0	3	3	2	2	1	1	NaN	NaN	NaN	NaN	NaN	NaN	13.2657	12.9926	13.6638	11.7503	11.4317	11.9473	12.1791	NaN	13.5043	NaN	11.4456	11.2446	NaN	NaN	10.4408	10.7415	NaN
Bscl2	Q9Z2E9	Q9Z2E9	Seipin	0	0	0	0.855077	1.15466	0.936696	0.773781	-0.225873	0.20747	-0.0943467	-0.370003	0.666614	0.157323	0.818493	0.0668292	3	3	3	3	3	3	3	3	12.2027	12.0061	10.7502	11.7193	11.1222	11.4399	12.6133	12.6224	12.8327	12.7447	13.073	12.8731	12.8857	13.4653	13.9618	12.8914	13.6096	13.5287	12.6735	12.6878	13.0895	12.4001	12.5617
Bsdc1	Q80Y55	Q80Y55	BSD domain-containing protein 1	0	0	0	0.959333	0.384944	0.51817	0.930325	-0.0598967	-1.37728	-0.948503	-0.104193	0.622746	0.122241	0.344978	0.921722	3	3	3	3	3	3	3	3	13.7469	13.9135	13.7584	13.5692	13.911	13.7589	14.4918	14.388	16.3262	14.3239	13.3756	13.3746	14.6337	13.2459	16.2103	13.5461	13.4916	14.2068	13.9066	16.1823	15.9185	15.0754	14.1229
Bsg	P18572	P18572	Basigin	0	0	0	1.27348	0.912011	1.1805	1.53627	0.348777	-0.132877	0.2394	0.61943	0.174843	0.365956	0.0922944	0.0258271	3	3	3	3	3	3	3	3	17.6923	17.2161	17.9053	17.8868	17.9051	18.0681	18.9454	18.7969	19.1966	18.929	18.7338	18.8774	18.6778	18.615	18.9077	18.9478	19.0912	18.8796	18.0506	17.817	17.7451	18.1997	18.7211
Bsn	O88737	O88737	Protein bassoon	0	0	0	0.743802	0.255885	0.410954	0.419061	-0.42701	-1.96643	-1.28295	-1.25477	0.802536	0.0061583	0.214331	0.0655564	3	3	3	3	3	3	3	3	14.8081	12.0282	10.3572	13.8314	10.9345	11.1465	16.7223	16.1763	17.2485	15.0229	14.3439	14.881	15.7342	14.3602	17.2177	14.9044	14.5929	13.966	13.9989	14.3085	15.3854	13.8459	13.0421
Bst2	Q8R2Q8	Q8R2Q8	Bone marrow stromal antigen 2	0	0	0	0.976061	1.33876	4.40209	4.18174	-0.0349567	0.420897	2.13819	2.0641	0.931957	0.112894	0.0170881	0.0733988	3	3	3	3	3	3	3	3	15.5725	15.4256	15.6994	15.4088	16.2353	14.9485	15.7648	15.4811	15.3012	16.1344	15.624	16.0515	13.9643	15.5331	15.4709	16.7975	17.1639	17.4216	15.3288	15.5188	12.8696	16.5288	16.7587
Btbd17	Q9DB72	Q9DB72	BTB/POZ domain-containing protein 17	0	0	0	NaN	0.636887	0.827236	0.491516	NaN	-0.65089	-0.273628	-1.02469	NaN	NaN	NaN	NaN	1	0	1	1	3	2	1	1	NaN	12.2918	NaN	NaN	NaN	NaN	NaN	NaN	15.5182	NaN	14.8673	NaN	15.1006	14.7567	15.9701	15.1442	NaN	14.8601	NaN	NaN	13.6717	NaN	12.647
Btd	Q8CIF4	Q8CIF4	Biotinidase	0	0	0	0.945271	1.09689	0.859095	1.61808	-0.0812	0.133413	-0.21911	0.694283	0.594417	0.210554	0.0663208	0.314266	3	3	3	3	3	3	3	3	14.777	14.7834	15.0959	14.6661	14.9816	14.765	15.973	15.8939	15.6835	16.0149	15.9986	15.9373	16.2614	16.1795	16.0429	16.0548	15.8508	15.9209	15.5699	15.4866	15.5872	17.4399	15.5211
Btf3	Q64152	Q64152	Transcription factor BTF3	0	0	0	1.00614	1.13275	1.01246	0.744206	0.00882667	0.179823	0.0178667	-0.426227	0.928414	0.127384	0.918931	0.0420367	3	3	3	3	3	3	3	3	17.852	18.0713	18.0581	18.118	17.966	17.9239	18.0658	18.1318	17.895	18.2842	18.2597	18.0882	18.5512	18.603	18.1507	18.6084	18.3289	18.4212	17.2941	17.1973	17.2985	16.8289	17.0849
Btf3l4	Q9CQH7	Q9CQH7	Transcription factor BTF3 homolog 4	0	0	0	1.01082	1.06857	0.941644	0.764734	0.0155267	0.0956867	-0.0867467	-0.38697	0.86494	0.103865	0.477556	0.152564	3	3	3	3	3	3	3	3	18.3017	18.4452	18.5716	18.3845	18.4846	18.496	20.0463	20.1148	19.9673	20.158	20.1513	20.1062	20.3479	20.2877	20.0258	20.1993	20.1665	20.0354	19.5526	19.3665	19.0315	18.7643	19.2454
Btk	P35991	P35991	Tyrosine-protein kinase BTK	0	0	0	0.95089	1.04998	1.03127	1.00813	-0.07265	0.07036	0.0444233	0.0116867	0.482602	0.279283	0.493105	0.873039	3	3	3	3	3	3	3	3	17.9377	17.8783	18.0064	18.037	17.8153	17.7522	18.6513	18.6821	18.575	18.6182	18.726	18.7753	18.933	19.0286	18.8278	18.9775	18.9908	18.9544	18.6548	18.5718	18.4371	18.5503	18.531
Btnl1	Q7TST0	Q7TST0	Butyrophilin-like protein 1	0	0	0	NaN	NaN	0.634037	0.745937	NaN	NaN	-0.65736	-0.422875	NaN	NaN	0.0963911	NaN	1	0	1	0	3	3	3	2	NaN	NaN	15.9957	NaN	NaN	NaN	NaN	15.8733	NaN	NaN	NaN	NaN	16.416	16.5082	15.9771	16.152	15.3453	15.4319	15.7445	16.1849	14.1308	16.0106	13.8504
Bub3	Q9WVA3	Q9WVA3	Mitotic checkpoint protein BUB3	0	0	0	1.09969	1.27813	1.09126	0.890197	0.137103	0.35404	0.126	-0.167803	0.543106	0.0362858	0.543046	0.213918	3	3	3	3	3	3	3	3	18.9125	18.9241	18.3108	18.7904	18.9287	18.8396	19.4296	19.6244	19.2607	19.8808	19.7611	19.7349	19.8788	19.9662	19.364	19.8319	19.8394	19.9157	19.2077	19.2575	19.0613	19.1444	19.0592
Bud31	Q6PGH1	Q6PGH1	Protein BUD31 homolog	0	0	0	0.953092	1.22338	1.01215	1.29984	-0.0693133	0.290873	0.01743	0.37833	0.601559	0.19906	0.853313	0.0127559	3	3	3	3	3	3	3	3	14.8207	15.1599	14.7949	14.8602	14.7948	14.9125	16.2293	16.4908	16.1199	16.2631	16.7306	16.7189	16.5434	16.6544	16.5984	16.7804	16.5462	16.5219	16.4913	16.6224	16.6527	16.9103	16.8791
Bysl	O54825	O54825	Bystin	0	0	0	0.82831	2.44745	3.67152	0.870014	-0.271757	1.29128	1.87638	-0.20089	0.392872	0.321903	0.0480833	0.579363	3	3	3	3	3	3	3	3	14.7423	15.6348	15.0287	14.8468	14.687	15.0569	14.1776	17.8594	16.3709	18.235	17.0735	16.9732	16.4715	14.5943	14.4614	16.9154	17.356	16.8849	14.3786	14.9181	15.1865	14.9974	14.1939
Bzw1	Q9CQC6	Q9CQC6	Basic leucine zipper and W2 domain-containing protein 1	0	0	0	0.981552	1.0191	0.919986	0.810618	-0.0268633	0.0272967	-0.120317	-0.302907	0.607754	0.40321	0.0516284	0.00319099	3	3	3	3	3	3	3	3	19.1389	19.1394	19.1904	19.2193	19.0921	19.0767	20.2739	20.2209	20.2549	20.2541	20.3267	20.2507	20.3713	20.41	20.2939	20.292	20.2207	20.2016	19.4657	19.5119	19.4548	19.108	19.2591
Bzw2	Q91VK1	Q91VK1	Basic leucine zipper and W2 domain-containing protein 2	0	0	0	1.20823	0.955338	0.912359	0.721784	0.272897	-0.0659167	-0.132327	-0.47036	0.303835	0.559875	0.092435	0.00330899	3	3	3	3	3	3	3	3	15.4572	14.8558	15.1548	15.7294	15.3295	15.2276	16.6011	16.7938	16.735	16.4761	16.6903	16.7656	16.5727	16.7577	16.6898	16.5542	16.4904	16.5786	16.3422	16.1748	16.142	15.6893	15.7276
C1qa	P98086	P98086	Complement C1q subcomponent subunit A	0	0	0	1.11478	1.56184	1.15707	1.97274	0.156753	0.643243	0.210477	0.980203	0.19863	0.00240876	0.166249	0.0026998	3	3	3	3	3	3	3	3	17.2548	17.2577	17.237	17.2051	17.5308	17.4839	18.0728	17.8816	17.8677	18.6904	18.6013	18.46	19.291	19.5122	19.4506	19.4728	19.5824	19.83	19.1824	19.1344	19.0515	19.9053	20.3809
C1qb	P14106	P14106	Complement C1q subcomponent subunit B	0	0	0	1.03257	1.58158	1.16939	1.79688	0.0462367	0.661367	0.22576	0.845493	0.237316	0.00768664	0.0622786	0.00629468	3	3	3	3	3	3	3	3	18.9334	18.8598	18.9135	18.9576	18.9013	18.9866	20.1641	20.2039	19.8248	20.7217	20.8268	20.6284	21.2172	21.2787	21.0052	21.403	21.3371	21.4384	20.9485	20.8779	20.5659	21.4239	21.7714
C1qbp	O35658	O35658	Complement component 1 Q subcomponent-binding protein, mitochondrial	0	0	0	1.1586	0.733643	1.09016	1.09588	0.212387	-0.44685	0.124533	0.13209	0.224743	0.0324984	0.408734	0.31998	3	3	3	3	3	3	3	3	18.3319	18.3605	17.904	18.4297	18.4126	18.3912	19.9237	19.6417	19.9119	19.5861	19.2557	19.295	19.772	19.6154	19.8225	19.9366	20.0205	19.6265	18.8299	18.772	18.8854	18.9255	19.17
C1qc	Q02105	Q02105	Complement C1q subcomponent subunit C	0	0	0	1.02695	1.65224	1.13275	1.83663	0.0383633	0.72442	0.179827	0.87706	0.772449	0.00236323	0.0213745	0.0176112	3	3	3	3	3	3	3	3	17.6983	17.8692	18.0663	17.789	17.9877	17.972	19.4328	19.3979	19.1238	20.0287	20.1179	19.9812	20.2948	20.4252	20.2786	20.5178	20.537	20.4833	19.6816	19.5868	19.3116	20.0312	20.6952
C1qtnf5	Q8K479	Q8K479	Complement C1q tumor necrosis factor-related protein 5	0	0	0	0.623206	0.602006	0.21528	0.18332	-0.68222	-0.73215	-2.21572	-2.44756	0.517127	0.29331	0.0286179	NaN	3	3	3	3	3	3	3	2	15.2224	15.281	14.8897	16.0899	14.47	12.7865	15.6951	16.6733	15.3257	14.2831	15.4308	15.7837	16.7656	17.1763	17.7294	13.9	15.961	15.1631	16.5121	17.171	16.663	15.3185	NaN
C2cd2l	Q80X80	Q80X80	C2 domain-containing protein 2-like	0	0	0	1.31524	0.741311	0.929171	1.51722	0.39533	-0.43185	-0.105983	0.60143	0.422543	0.0651135	0.705679	0.0150312	3	3	3	3	3	3	3	3	15.7352	14.4113	14.8121	15.5984	14.9692	15.5769	16.0013	15.8323	16.2964	15.5316	15.4843	15.8185	15.9769	15.5625	16.3707	15.9771	15.9857	15.6293	15.3326	14.9561	15.2498	15.8912	15.5963
C2cd4cC2CD4 family	Q5HZI2	Q5HZI2	C2 calcium-dependent domain-containing protein 4C	0	0	0	NaN	NaN	0.446439	NaN	NaN	NaN	-1.16347	NaN	NaN	NaN	NaN	NaN	0	0	2	0	2	2	0	0	NaN	NaN	NaN	NaN	NaN	NaN	NaN	11.5936	13.0755	NaN	NaN	NaN	NaN	12.9174	13.6133	11.8473	12.3564	NaN	NaN	NaN	NaN	NaN	NaN
C3	P01027	P01027	Complement C3	0	0	0	1.71055	1.1974	1.25705	1.21145	0.774458	0.259903	0.33004	0.276737	NaN	0.345457	0.173783	0.515237	2	3	3	3	3	3	3	3	15.0562	NaN	10.4918	15.1746	12.2634	13.2074	17.7904	17.2438	17.3789	17.6362	17.4788	18.0778	16.7678	16.1577	16.3967	16.8574	16.8672	16.5876	15.9612	16.5319	16.1172	16.9018	16.7506
C3ar1	O09047	O09047	C3a anaphylatoxin chemotactic receptor	0	0	0	0.841594	0.950986	1.02256	0.876373	-0.248803	-0.0725033	0.03218	-0.190383	0.0561292	0.859263	0.85967	0.46304	3	3	3	3	3	3	3	3	15.5839	15.6583	15.5039	15.4969	15.2416	15.2612	16.5549	15.7625	15.2559	15.6651	15.8876	15.803	15.737	15.9731	16.1232	16.0373	16.1625	15.73	16.3321	16.4025	15.8041	16.265	15.8133
C4b	P01029	P01029	Complement C4-B	0	0	0	NaN	0.408223	NaN	7.24761	NaN	-1.29257	NaN	2.8575	NaN	NaN	NaN	NaN	0	0	1	2	0	1	2	3	NaN	NaN	NaN	NaN	NaN	NaN	NaN	14.0314	NaN	12.8638	NaN	12.6139	NaN	NaN	NaN	10.7921	NaN	NaN	12.2324	12.0477	NaN	15.0906	14.9273
C5ar1	P30993	P30993	C5a anaphylatoxin chemotactic receptor 1	0	0	-1	0.931383	1.13802	0.745319	0.616113	-0.102553	0.186527	-0.42407	-0.698733	0.602668	0.250154	0.0322695	0.0106982	3	3	3	3	3	3	3	3	15.6331	15.9102	16.1214	15.9542	15.5681	15.8348	17.8878	17.9384	17.8961	17.9589	18.3698	17.9532	17.0259	17.2226	17.0563	16.9036	16.5146	16.6144	15.5338	15.3642	15.5134	14.9571	14.8727
C5ar2	Q8BW93	Q8BW93	C5a anaphylatoxin chemotactic receptor 2	0	0	0	0.660585	1.0642	0.538638	NaN	-0.598183	0.089765	-0.892613	NaN	0.360469	NaN	0.0437003	NaN	3	3	3	2	3	3	3	0	14.1093	13.9859	13.1067	12.1951	13.8199	13.3924	15.405	15.2808	14.5567	NaN	15.0113	15.3298	15.4309	15.839	14.8788	14.6785	14.2427	14.5496	14.5643	14.5164	14.1017	NaN	NaN
Ca1	P13634	P13634	Carbonic anhydrase 1	0	0	0	0.711362	0.532632	0.423895	1.63692	-0.491343	-0.90879	-1.23822	0.710983	0.353506	0.354427	0.0727387	0.344225	3	3	3	3	3	3	3	3	16.9774	17.7753	16.4995	17.1572	16.2462	16.3748	19.7081	18.7136	19.1551	19.9109	17.6374	17.3022	18.9986	18.7901	19.0103	18.6587	16.9427	17.483	19.1305	18.7132	17.8073	18.2099	19.9706
Ca14	Q9WVT6	Q9WVT6	Carbonic anhydrase 14	0	0	0	2.09173	0.408814	0.450559	1.83887	1.06469	-1.29048	-1.15021	0.87882	NaN	0.0213554	0.0403176	0.127521	1	3	3	3	3	3	3	3	NaN	NaN	13.9945	14.5962	15.1511	15.4301	16.791	16.6281	17.1234	15.0334	15.5007	16.137	16.933	16.3548	17.4517	16.1882	15.4661	15.6346	16.2867	15.7373	16.7472	17.8349	16.873
Ca2	P00920	P00920	Carbonic anhydrase 2	0	0	0	0.909978	0.252644	0.381012	1.16289	-0.136097	-1.98482	-1.39209	0.21772	0.783786	0.0323914	0.0723087	0.470581	3	3	3	3	3	3	3	3	17.8605	19.1769	17.7478	17.9897	18.1824	18.2048	21.9879	21.2411	22.0789	20.8911	19.1187	19.3437	21.4443	20.6199	22.3584	20.6366	19.7722	19.8375	20.666	20.2151	20.7677	20.3406	20.9442
Ca4	Q64444	Q64444	Carbonic anhydrase 4	0	0	0	0.610638	0.592321	0.411572	1.13832	-0.71161	-0.75555	-1.28078	0.1869	0.342556	0.0633159	0.0154449	0.631613	3	3	3	3	3	3	3	3	13.5062	13.7417	12.7092	12.4085	11.712	13.7019	16.4794	16.1005	16.9309	15.5246	15.6294	16.0903	16.4867	16.3245	17.1585	15.323	15.7216	15.0827	15.1727	15.2446	15.9601	16.16	15.3394
Cab39	Q06138	Q06138	Calcium-binding protein 39	0	0	0	0.958192	0.916176	0.893762	0.931915	-0.0616133	-0.126303	-0.162037	-0.10173	0.356507	0.0280373	0.0636877	0.186057	3	3	3	3	3	3	3	3	19.338	19.2727	19.3312	19.3127	19.1417	19.3027	19.8752	19.8836	19.9001	19.7062	19.7435	19.8303	20.0726	20.1339	20.2803	19.9681	20.0185	20.0142	19.6523	19.6441	19.8043	19.6721	19.5645
Cab39l	Q9DB16	Q9DB16	Calcium-binding protein 39-like	0	0	0	1.7853	0.780357	1.06651	1.39275	0.83617	-0.357793	0.0929033	0.47794	0.00650117	0.00866132	0.675896	0.0803256	3	3	3	3	3	3	3	3	15.6697	15.6697	15.6914	16.2232	16.7776	16.5386	17.2005	17.13	17.3605	16.9183	16.8156	16.8839	16.9657	17.0159	17.1273	16.9317	16.9252	17.5307	15.5638	15.5576	16.0704	15.986	16.2693
Cacna1a	P97445	P97445	Voltage-dependent P/Q-type calcium channel subunit alpha-1A	0	0	0	NaN	0.630628	1.01209	0.860508	NaN	-0.66514	0.0173417	-0.21674	NaN	0.222243	NaN	0.741638	0	0	3	3	3	2	3	3	NaN	NaN	NaN	NaN	NaN	NaN	13.8324	13.8414	14.657	12.7904	13.4709	14.0739	13.4533	12.2179	14.9276	14.0427	13.0578	NaN	13.0831	13.7577	14.8629	13.8247	13.0608
Cacna2d1	O08532	O08532	Voltage-dependent calcium channel subunit alpha-2/delta-1	0	0	0	2.40268	0.441064	0.675223	1.0665	1.26465	-1.18094	-0.566563	0.0928867	0.102227	0.0141393	0.392817	0.802236	3	3	3	3	3	3	3	3	11.4693	11.2476	11.4863	13.8319	11.8886	12.2767	15.6198	15.5679	16.3787	14.8126	14.4593	14.7517	15.2138	14.3465	16.2757	14.8208	14.9883	14.3272	13.8826	14.2382	14.8353	14.754	14.0361
Cacna2d3	Q9Z1L5	Q9Z1L5	Voltage-dependent calcium channel subunit alpha-2/delta-3	0	0	0	NaN	0.342492	NaN	NaN	NaN	-1.54586	NaN	NaN	NaN	NaN	NaN	NaN	0	0	3	1	1	0	0	0	NaN	NaN	NaN	NaN	NaN	NaN	10.8373	12.0731	13.0631	10.4453	NaN	NaN	NaN	NaN	8.89716	NaN	NaN	NaN	NaN	NaN	NaN	NaN	NaN
Cacng3	Q9JJV5	Q9JJV5	Voltage-dependent calcium channel gamma-3 subunit	0	0	0	1.67375	2.18069	NaN	1.03492	0.74308	1.12478	NaN	0.04952	NaN	NaN	NaN	NaN	1	1	3	1	2	0	1	2	NaN	NaN	14.6428	15.3858	NaN	NaN	16.2623	15.868	16.8973	NaN	17.4673	NaN	17.2744	NaN	16.0453	NaN	NaN	NaN	14.1702	NaN	NaN	NaN	11.7351
Cacng8	Q8VHW2	Q8VHW2	Voltage-dependent calcium channel gamma-8 subunit	0	0	0	NaN	0.361114	0.456465	NaN	NaN	-1.46947	-1.13143	NaN	NaN	0.0133443	NaN	NaN	0	0	3	3	2	1	0	1	NaN	NaN	NaN	NaN	NaN	NaN	14.8253	14.5289	15.4334	13.6046	13.0222	13.7524	13.5439	NaN	15.1076	NaN	13.1943	NaN	NaN	NaN	NaN	NaN	12.3273
Cactin	Q9CS00	Q9CS00	Cactin	0	0	0	0.977171	1.02599	1.0264	0.625576	-0.0333167	0.0370233	0.0375933	-0.676743	0.90565	0.856485	0.824717	0.351736	3	3	3	3	3	3	3	3	16.3327	16.2034	16.2712	16.7557	16.0217	15.93	17.9581	18.0958	17.5527	17.7062	18.0365	17.975	17.6889	17.7794	17.4088	17.7561	17.4378	17.7959	16.7553	17.6532	16.3874	15.5452	17.2713
Cacul1	Q8R0X2	Q8R0X2	CDK2-associated and cullin domain-containing protein 1	0	0	0	0.891762	0.919125	1.24252	1.06194	-0.16527	-0.121667	0.313263	0.0866967	NaN	0.40048	0.160765	0.66979	2	2	3	3	3	3	3	3	13.5588	13.1596	NaN	13.2334	NaN	13.1545	15.0667	15.1201	14.9589	14.7136	15.1305	14.9367	14.881	15.1483	14.8561	15.0697	15.1733	15.5821	14.7123	14.7675	14.3063	14.7341	14.8594
Cacybp	Q9CXW3	Q9CXW3	Calcyclin-binding protein	0	0	0	1.01343	0.906207	1.11918	1.24469	0.01924	-0.142087	0.162437	0.315783	0.699316	0.00519918	0.246358	0.0256462	3	3	3	3	3	3	3	3	18.2129	18.1572	18.249	18.2937	18.2202	18.1628	19.0392	18.9816	18.9795	18.8717	18.825	18.8773	18.8176	18.6763	19.0729	19.0668	18.9653	19.022	18.4685	18.3841	18.2896	18.5516	18.8024
Cad	B2RQC6	B2RQC6	CAD protein	0	0	0	1.06179	1.38983	1.38371	1.37028	0.0865033	0.47491	0.46854	0.454473	0.0853725	0.00239512	0.00107862	0.000322031	3	3	3	3	3	3	3	3	17.2595	17.1823	17.149	17.2941	17.3104	17.2458	18.1611	18.0545	17.9567	18.5232	18.5999	18.474	18.4848	18.5334	18.4048	19.0216	18.9227	18.8842	18.2551	18.2299	18.2597	18.7675	18.7057
Cadm1	Q8R5M8	Q8R5M8	Cell adhesion molecule 1	0	0	0	1.17887	1.52039	1.80787	1.95766	0.23741	0.604443	0.854293	0.96913	0.744336	0.0038511	0.0238742	0.110219	3	3	3	3	3	3	3	3	13.5717	13.4808	14.7191	13.5298	15.2573	13.6968	15.9055	16.0116	16.0577	16.4282	16.6245	16.7355	15.8927	16.3651	16.4336	17.3221	17.1785	16.7537	16.6242	15.5377	15.1066	17.009	16.6195
Cadm2	Q8BLQ9	Q8BLQ9	Cell adhesion molecule 2	0	0	0	1.43707	0.668222	0.799001	1.40121	0.523133	-0.5816	-0.32373	0.48667	0.290856	0.0593301	0.613982	0.273688	3	3	3	3	3	3	3	3	11.999	12.1585	12.9313	12.2579	13.0963	13.3039	16.0065	15.8379	16.5719	15.5728	15.5208	15.578	15.8015	14.6774	16.5703	15.6197	15.5404	14.918	14.5423	14.2205	15.4476	15.3466	15.0009
Cadm3	Q99N28	Q99N28	Cell adhesion molecule 3	0	0	0	1.89464	0.577201	0.877795	1.33969	0.92192	-0.792853	-0.188043	0.421903	0.0238805	0.073889	0.764291	0.217997	3	3	3	3	3	3	3	3	13.7511	13.4521	12.987	14.049	14.4561	14.4509	17.6354	17.2425	18.2799	17.1528	16.699	16.9273	16.9653	15.8518	17.872	16.7381	16.765	16.6219	15.5598	15.2559	16.1443	16.2295	16.1675
Cadm4	Q8R464	Q8R464	Cell adhesion molecule 4	0	0	0	0.675323	0.809468	0.771333	1.12742	-0.56635	-0.304953	-0.374573	0.173027	0.0881346	0.243695	0.172628	0.688231	3	3	3	3	3	3	3	3	19.2163	19.2625	18.8662	18.9286	18.5476	18.1698	19.0151	18.7101	19.2291	18.6079	18.9943	18.4372	19.063	18.5928	19.276	18.7672	18.4175	18.6234	18.7747	18.9268	18.7189	19.7505	18.4365
Cadps	Q80TJ1	Q80TJ1	Calcium-dependent secretion activator 1	0	0	0	2.15649	0.394744	0.654929	1.00058	1.10869	-1.34101	-0.61059	0.00083	0.0266024	0.0094963	0.477565	0.998592	3	3	3	3	3	3	3	3	14.2537	13.2979	14.2294	15.0015	14.9261	15.1796	19.1758	18.8976	19.7411	18.0977	17.6435	18.0502	18.4717	17.2466	19.7869	18.2411	18.0627	17.3697	17.0044	17.1367	18.0413	17.7217	16.798
Calb1	P12658	P12658	Calbindin	0	0	0	1.18737	0.382523	0.579892	1.13427	0.247767	-1.38638	-0.786143	0.18177	0.0127608	0.0124164	0.183504	0.551585	3	3	3	3	3	3	3	3	16.8217	16.9351	16.9827	17.0962	17.1879	17.1987	20.2524	19.75	20.5404	19.0366	18.3502	18.9969	19.6486	18.8329	20.3628	19.1109	18.9575	18.4175	18.4455	18.4362	19.1713	19.0797	18.6074
Calb2	Q08331	Q08331	Calretinin	0	0	0	1.75046	0.287774	0.533463	1.22037	0.80773	-1.79699	-0.90654	0.287317	0.38514	0.00717774	0.267709	0.500023	3	3	3	3	3	3	3	3	13.9133	15.0341	13.3198	13.9116	16.1488	14.6299	18.1466	17.8754	18.6593	16.8763	15.9415	16.4723	17.5894	16.4778	18.383	17.094	16.9294	15.7072	16.1459	16.1867	17.162	17.1112	16.4202
Calcoco1	Q8CGU1	Q8CGU1	Calcium-binding and coiled-coil domain-containing protein 1	0	0	0	0.250162	1.74636	0.404633	1.11128	-1.99907	0.80435	-1.30531	0.152223	0.0115732	0.491627	0.368259	0.404446	3	3	3	3	3	3	3	3	15.4293	15.4437	15.5321	13.8342	14.0028	12.5709	15.3994	15.6885	15.8377	15.3974	18.558	15.3833	19.5914	15.5365	15.9516	15.6961	15.7706	15.6969	14.5554	14.4817	14.9661	14.6934	14.8796
Calcrl	Q9R1W5	Q9R1W5	Calcitonin gene-related peptide type 1 receptor	0	0	0	0.918009	0.609871	0.768155	0.827691	-0.12342	-0.713423	-0.38053	-0.272837	0.530474	0.335545	0.0255494	0.154386	3	3	3	3	3	3	3	3	14.7222	14.4319	14.6703	14.6204	14.1732	14.6605	14.4317	16.4102	14.4989	14.2619	14.4854	14.4533	14.8348	14.9072	14.6028	14.4382	14.2839	14.4811	14.7808	14.9226	15.007	14.8722	14.3842
Calhm2	Q8VEC4	Q8VEC4	Calcium homeostasis modulator protein 2	0	0	0	1.04357	1.08871	1.20007	0.983266	0.0615267	0.122613	0.263123	-0.0243467	0.600664	0.341676	0.167114	0.872879	3	3	3	3	3	3	3	3	14.8516	14.9391	15.1989	15.0987	15.0749	15.0005	15.7683	15.9566	15.8859	15.7953	16.0698	16.1136	16.1087	16.2231	15.7373	16.3828	16.2773	16.1983	16.0815	15.686	15.7438	15.6902	15.9393
Calm1	P62204	P62204	Calmodulin	0	0	0	0.845951	0.835264	0.858361	0.867653	-0.241353	-0.259697	-0.220343	-0.20481	0.195215	0.0947743	0.150028	0.0725718	3	3	3	3	3	3	3	3	23.0665	22.8525	22.9967	22.447	22.8591	22.8856	23.6249	23.48	23.6598	23.5306	23.2812	23.1739	23.8325	23.5999	23.6841	23.536	23.6337	23.2858	22.7857	22.7964	22.8526	22.755	22.5931
Calml3	Q9D6P8	Q9D6P8	Calmodulin-like protein 3	0	0	0	1.04753	0.767014	0.89905	0.766995	0.06699	-0.382675	-0.153527	-0.38271	0.764688	NaN	0.796277	0.439542	3	3	2	3	3	3	3	3	17.6778	17.5105	17.518	18.0383	17.4091	17.4598	NaN	16.4375	15.4771	15.7425	15.8078	15.1737	18.0114	17.0766	16.1114	16.9814	16.7281	17.0294	16.5624	17.4209	15.9716	16.5625	16.0778
Calr	P14211	P14211	Calreticulin	0	0	1	0.969601	1.20827	1.39292	1.79877	-0.0445367	0.272943	0.47811	0.84701	0.295933	0.00879637	0.00472723	0.0020636	3	3	3	3	3	3	3	3	22.4396	22.5406	22.531	22.4335	22.4492	22.4949	23.3526	23.4824	23.3138	23.6957	23.6644	23.6075	23.6292	23.6001	23.4957	24.1947	24.0177	23.9469	23.3288	23.1866	23.0264	23.9415	24.1893
Calu	O35887	O35887	Calumenin	0	0	0	0.911211	0.957437	1.04361	0.88277	-0.134143	-0.06275	0.0615867	-0.17989	0.0338108	0.51214	0.445519	0.137737	3	3	3	3	3	3	3	3	18.9538	19.0532	19.0367	18.8229	18.9159	18.9026	19.8087	19.9824	19.786	19.6769	19.8815	19.8305	20.2967	20.197	20.0526	20.2628	20.2585	20.2098	19.7651	19.7985	19.8348	19.8096	19.5286
Camk1	Q91YS8	Q91YS8	Calcium/calmodulin-dependent protein kinase type 1	0	0	0	0.996777	1.00148	1.03301	0.795314	-0.00465667	0.00212667	0.04686	-0.330403	0.962827	0.978357	0.382754	0.00659249	3	3	3	3	3	3	3	3	19.9757	19.8936	19.9116	20.1007	19.8598	19.8063	20.3795	20.5842	20.4693	20.4072	20.4737	20.5585	20.5959	20.6019	20.5124	20.6736	20.5444	20.6328	20.4031	20.4412	20.3379	20.1032	19.9528
Camk1d	Q8BW96	Q8BW96	Calcium/calmodulin-dependent protein kinase type 1D	0	0	0	0.968034	0.976027	0.97452	0.802904	-0.04687	-0.0350067	-0.0372367	-0.3167	0.36538	0.585632	0.7167	0.00251453	3	3	3	3	3	3	3	3	16.2544	16.2594	16.3938	16.2654	16.2474	16.2541	17.2239	17.1073	17.253	17.2257	17.1624	17.091	17.2518	17.3691	17.2543	17.2796	17.0921	17.3917	16.9237	16.9484	16.9644	16.553	16.71
Camk2a	P11798	P11798	Calcium/calmodulin-dependent protein kinase type II subunit alpha	0	0	0	1.06513	0.71819	0.834681	1.39412	0.0910233	-0.477563	-0.260703	0.479357	0.112667	0.0738	0.672518	0.16619	3	3	3	3	3	3	3	3	18.3836	18.3182	18.4327	18.4727	18.4151	18.5199	21.5008	21.1342	21.8194	21.0231	20.9813	21.0173	21.2453	20.3431	22.2602	21.1406	21.1935	20.7324	20.2904	20.393	21.0671	21.1322	20.7841
Camk2b	P28652	P28652	Calcium/calmodulin-dependent protein kinase type II subunit beta	0	0	0	1.02966	0.588755	0.770925	1.34196	0.0421633	-0.76426	-0.375337	0.42434	0.520235	0.011319	0.506535	0.176682	3	3	3	3	3	3	3	3	16.138	16.0296	15.9543	16.0581	16.053	16.1374	19.1427	18.8756	19.4611	18.3787	18.3521	18.4559	19.0269	18.248	19.9523	18.8417	18.8598	18.3998	18.0436	18.0766	18.6427	18.8579	18.3366
Camk2d	Q6PHZ2	Q6PHZ2	Calcium/calmodulin-dependent protein kinase type II subunit delta	0	0	0	1.02222	1.0526	0.866962	0.877779	0.0317	0.0739567	-0.20596	-0.18807	0.603254	0.330005	0.0107661	0.00899563	3	3	3	3	3	3	3	3	19.3748	19.3053	19.4361	19.4775	19.3332	19.4005	20.6891	20.4939	20.5872	20.6652	20.7253	20.6016	20.496	20.557	20.5118	20.294	20.2564	20.3965	19.779	19.7217	19.7881	19.6423	19.5428
Camk2g	Q923T9	Q923T9	Calcium/calmodulin-dependent protein kinase type II subunit gamma	0	0	0	1.01063	0.829454	0.911615	1.26565	0.01525	-0.269767	-0.133503	0.33988	0.655129	0.0648321	0.493777	0.0745466	3	3	3	3	3	3	3	3	16.3268	16.2795	16.3493	16.3654	16.2866	16.3494	17.7312	17.5394	17.8978	17.4167	17.5032	17.4393	17.8056	17.651	18.2158	17.8313	17.7923	17.6483	17.1479	17.2874	17.5545	17.8166	17.5589
Camkk1	Q8VBY2	Q8VBY2	Calcium/calmodulin-dependent protein kinase kinase 1	0	0	0	1.33315	0.717909	0.703935	0.48247	0.414843	-0.478127	-0.506487	-1.05149	0.325205	0.0234185	0.247042	NaN	3	3	3	3	3	3	3	2	12.8949	12.7238	13.6957	13.8307	13.6276	13.1006	14.7367	14.7638	15.0982	14.3039	14.3406	14.5198	14.696	14.6789	15.3132	13.9791	14.9979	14.1916	14.1545	14.1503	14.6563	13.0637	13.474
Camkk2	Q8C078	Q8C078	Calcium/calmodulin-dependent protein kinase kinase 2	0	0	0	0.977648	0.88731	0.978138	1.50304	-0.0326133	-0.17249	-0.03189	0.58788	0.880171	0.325289	0.895563	0.116339	3	3	3	3	3	3	3	3	14.1792	14.4383	14.6252	14.0765	14.4736	14.5948	16.086	15.9185	16.4332	15.9347	15.96	16.0254	15.648	15.5666	16.2773	15.8779	15.7503	15.768	14.704	14.8034	15.2616	15.0552	15.6145
Camkv	Q3UHL1	Q3UHL1	CaM kinase-like vesicle-associated protein	0	0	0	1.0397	1.6125	1.23093	4.2168	0.0561717	0.689303	0.299743	2.07615	NaN	0.055215	0.613791	0.000609486	2	3	3	3	3	3	3	3	12.8278	13.8273	NaN	13.6986	14.1564	12.2961	16.9544	16.8751	17.6489	17.9932	17.8157	17.7374	16.525	15.6449	17.5192	16.9455	16.9556	16.6872	14.2672	13.8315	14.5181	16.414	16.2473
Camlg	P49070	P49070	Calcium signal-modulating cyclophilin ligand	0	0	0	0.917116	1.10552	0.891788	1.0672	-0.124823	0.14472	-0.165227	0.0938267	0.687809	0.505787	0.497425	0.51616	3	3	3	3	3	3	3	3	14.9264	14.3277	14.8592	14.3177	15.0123	14.4089	15.8448	15.3983	15.3474	15.5028	15.6169	15.905	15.7182	15.7021	15.1991	15.5128	15.5197	15.0912	15.2787	15.279	15.0837	15.0965	15.3353
Camp	P51437	P51437	Cathelicidin antimicrobial peptide	0	0	-1	0.908757	1.00365	0.569525	0.132476	-0.138033	0.00525667	-0.81217	-2.9162	0.580726	0.989817	0.233896	0.0338449	3	3	3	3	3	3	3	3	15.9392	16.6152	16.5673	16.1018	16.2491	16.3568	17.5839	17.6305	17.0109	16.8398	17.4116	17.9897	17.4621	17.6363	15.8611	16.3725	15.9282	16.2223	17.6634	17.0883	17.1058	16.0616	14.0569
Camsap1	A2AHC3	A2AHC3	Calmodulin-regulated spectrin-associated protein 1	0	0	0	0.874997	0.760512	0.905211	0.785034	-0.19265	-0.394957	-0.143673	-0.349173	0.641314	0.290252	0.36568	0.0778679	3	3	3	3	3	3	3	3	13.3483	14.126	12.9521	12.968	13.5345	13.346	15.5324	15.5539	16.0452	15.6661	14.7671	15.5135	15.628	15.8025	16.0079	15.638	15.534	15.8354	15.0844	15.152	15.1064	14.901	14.4718
Camsap2	Q8C1B1	Q8C1B1	Calmodulin-regulated spectrin-associated protein 2	0	0	0	1.3238	0.731044	0.82872	0.974353	0.404683	-0.45197	-0.271043	-0.0374833	0.119378	0.0173942	0.152053	0.822204	3	3	3	3	3	3	3	3	12.6285	12.7343	13.1578	13.0489	13.4793	13.2064	14.514	14.5615	14.7979	14.3212	14.1175	14.0788	14.4596	14.4165	14.8521	14.1878	14.3117	14.4156	13.9049	14.1498	14.305	14.2757	13.9184
Camta2	Q80Y50	Q80Y50	Calmodulin-binding transcription activator 2	0	0	0	1.23256	0.415277	0.740494	0.946683	0.301657	-1.26785	-0.43344	-0.0790467	0.1756	0.0585361	0.325912	0.773888	3	3	3	3	3	3	3	3	16.7748	16.2431	16.5898	17.0314	16.7338	16.7475	19.9911	18.8451	20.0669	18.9071	17.9849	18.2076	18.4644	17.8967	19.1399	18.2955	18.1067	17.7985	17.4869	17.7142	18.323	17.8226	17.8258
Cand1	Q6ZQ38	Q6ZQ38	Cullin-associated NEDD8-dissociated protein 1	0	0	0	0.987815	0.88394	1.01111	1.12222	-0.0176867	-0.17798	0.0159367	0.16636	0.832411	0.107195	0.8728	0.0493044	3	3	3	3	3	3	3	3	19.7183	19.6768	19.7764	19.8514	19.6426	19.6245	20.8873	20.8052	21.0174	20.715	20.6274	20.8337	20.9117	20.9831	21.2202	21.0608	21.0584	21.0436	20.5062	20.551	20.6584	20.8018	20.7453
Cand2	Q6ZQ73	Q6ZQ73	Cullin-associated NEDD8-dissociated protein 2	0	0	0	1.01559	1.17783	1.40536	1.44187	0.02232	0.236133	0.49094	0.527943	0.764508	0.00645487	0.00313783	0.0644864	3	3	3	3	3	3	3	3	14.9636	14.9891	14.9577	15.128	14.9469	14.9026	15.5619	15.5714	15.4933	15.7495	15.7318	15.8537	15.5834	15.7954	15.7859	16.2806	16.1865	16.1703	15.9297	16.013	15.4796	16.0848	16.4305
Cant1	Q8VCF1	Q8VCF1	Soluble calcium-activated nucleotidase 1	0	0	0	0.879116	0.424289	0.740402	1.61111	-0.185875	-1.23688	-0.433618	0.688052	NaN	NaN	NaN	NaN	3	2	1	3	2	3	2	3	14.0782	14.0307	14.0085	NaN	13.85	13.8565	NaN	15.471	NaN	15.2445	13.4257	14.0322	15.5942	15.1049	NaN	14.5993	15.7574	14.3912	NaN	14.334	14.7241	15.5803	15.1585
Canx	P35564	P35564	Calnexin	0	0	0	0.943589	0.969297	0.860762	1.04795	-0.08377	-0.04499	-0.216313	0.0675767	0.313817	0.647028	0.00209369	0.49838	3	3	3	3	3	3	3	3	21.5165	21.6838	21.6811	21.4491	21.5851	21.5959	21.9502	22.2548	22.1335	22.0331	22.0643	22.1061	22.389	22.4279	22.458	22.233	22.1625	22.2305	21.9493	21.7088	21.7732	21.7702	21.9085
Cap1	P40124	P40124	Adenylyl cyclase-associated protein 1	0	0	0	0.910676	1.17005	1.2146	1.12067	-0.13499	0.226573	0.280483	0.164367	0.286272	0.0109233	0.0384121	0.134388	3	3	3	3	3	3	3	3	23.7448	23.7794	23.8581	23.8668	23.5766	23.534	24.3948	24.353	24.2524	24.5377	24.5273	24.6149	24.5554	24.6163	24.3226	24.8208	24.7707	24.7442	24.1947	24.2173	24.0029	24.195	24.3796
Cap2	Q9CYT6	Q9CYT6	Adenylyl cyclase-associated protein 2	0	0	0	1.22864	0.43371	0.76225	1.24753	0.29706	-1.2052	-0.391663	0.319077	0.435949	0.0168469	0.509931	0.318488	3	3	3	3	3	3	3	3	13.4954	14.6099	14.2828	14.5335	14.2417	14.504	17.6419	17.2776	18.1477	16.6988	16.144	16.6088	16.9606	16.0707	17.8366	16.7297	16.7668	16.1965	15.6762	15.6163	16.3256	16.3885	15.8656
Capg	P24452	P24452	Macrophage-capping protein	1	0	0	0.935777	2.95875	4.75973	4.58328	-0.0957633	1.56499	2.25088	2.19638	0.353277	0.000147671	7.11491e-05	0.000150964	3	3	3	3	3	3	3	3	18.5523	18.4847	18.6386	18.5939	18.4757	18.3188	19.2774	19.2311	19.1677	20.9441	20.5858	20.8413	19.472	19.5888	19.3327	21.8462	21.8039	21.4961	19.7681	19.4222	19.3215	21.7557	21.8018
Capn1	O35350	O35350	Calpain-1 catalytic subunit	0	1	0	0.926453	1.31843	1.70381	2.49556	-0.11021	0.398817	0.768763	1.31936	0.140475	0.0115478	0.000141409	0.000959704	3	3	3	3	3	3	3	3	16.8834	17.0427	17.0381	16.8331	16.9335	16.867	18.1281	17.9147	18.0297	18.5214	18.2977	18.4498	18.2243	18.256	18.3534	19.1215	19.0053	19.0131	17.8555	17.59	17.699	18.7731	19.1639
Capn2	O08529	O08529	Calpain-2 catalytic subunit	0	0	0	1.04161	0.671961	0.659047	1.32751	0.0588133	-0.57355	-0.601547	0.408723	0.633532	0.0865976	0.0462702	0.0612805	3	3	3	3	3	3	3	3	15.5586	15.6053	15.6458	15.4396	15.7668	15.7799	17.8515	17.4102	18.2681	17.3649	17.1748	17.2695	17.8155	17.8235	18.4457	17.4695	17.4414	17.3691	17.2942	17.0041	17.0417	17.304	17.5097
Capn3	Q64691	Q64691	Calpain-3	0	0	0	0.903321	1.0802	0.854514	0.915723	-0.14669	0.111293	-0.226823	-0.127017	0.540954	0.345988	0.125519	0.0858017	3	3	3	3	3	3	3	3	15.1673	14.7824	15.2744	15.118	15.0586	14.6075	15.7434	15.7116	15.718	15.8226	16.0217	15.6627	16.0663	16.1607	16.1172	15.8766	15.696	16.0911	15.7095	15.5458	15.6914	15.515	15.4892
Capn7	Q9R1S8	Q9R1S8	Calpain-7	0	0	0	0.806206	1.20248	1.01599	0.870323	-0.31078	0.26601	0.02289	-0.200377	0.289952	0.0125316	0.731809	0.154827	3	3	3	3	3	3	3	3	13.8098	14.4937	14.038	14.1041	13.7296	13.5756	15.1445	15.0025	15.0482	15.2488	15.4052	15.3392	15.5132	15.5792	15.3751	15.5266	15.5299	15.4797	15.162	15.0294	14.8418	14.6792	14.8973
Capns1	O88456	O88456	Calpain small subunit 1	0	0	0	0.978583	0.918786	1.10521	1.74492	-0.0312333	-0.1222	0.144323	0.80316	0.675025	0.385065	0.465513	0.00185287	3	3	3	3	3	3	3	3	18.0318	18.2067	18.0384	17.9863	18.1167	18.0802	19.2693	19.0862	19.438	19.2453	18.9998	19.1818	19.3536	19.3559	19.6843	19.7969	19.6981	19.3318	19.0595	18.9804	18.903	19.5983	19.8129
Caprin1	Q60865	Q60865	Caprin-1	0	0	0	1.18051	1.19466	1.21362	1.24724	0.23941	0.256603	0.279313	0.31874	0.147604	0.00284273	0.0569239	0.000844653	3	3	3	3	3	3	3	3	18.572	18.6042	18.2026	18.7137	18.7517	18.6315	19.4484	19.5538	19.4884	19.784	19.7714	19.705	19.9528	19.9769	19.6986	20.2316	20.1893	20.0454	19.46	19.5288	19.5	19.8491	19.8392
Capza1	P47753	P47753	F-actin-capping protein subunit alpha-1	0	0	0	0.858972	1.21533	1.00194	1.04937	-0.219317	0.281343	0.00279	0.0695167	0.0734542	0.0265578	0.976398	0.588998	3	3	3	3	3	3	3	3	22.6302	22.5752	22.6157	22.5666	22.3008	22.2958	22.4411	22.6671	22.4679	22.769	22.7632	22.8878	23.0597	23.2004	22.9243	22.9916	23.077	23.1241	22.5645	22.4122	22.2436	22.6139	22.4541
Capza2	P47754	P47754	F-actin-capping protein subunit alpha-2	0	0	0	0.866207	1.26176	1.06522	0.970262	-0.207217	0.335437	0.0911467	-0.0435533	0.0110208	0.0199164	0.478203	0.466907	3	3	3	3	3	3	3	3	21.4091	21.4166	21.4454	21.2994	21.2051	21.1449	21.845	21.9583	21.8164	22.0525	22.2944	22.2792	22.5447	22.3902	22.1782	22.5558	22.3958	22.435	21.6583	21.6605	21.6935	21.7329	21.5671
Capzb	P47757	P47757	F-actin-capping protein subunit beta	0	0	0	0.850697	1.12242	1.05002	1.25955	-0.233283	0.166617	0.07041	0.332913	0.00197989	0.0136792	0.281037	0.00288415	3	3	3	3	3	3	3	3	21.9342	21.9279	21.9153	21.7561	21.6549	21.6665	22.3873	22.4579	22.4618	22.5433	22.6506	22.613	22.7213	22.8946	22.7773	22.9167	22.8413	22.8464	22.2222	22.1288	22.1348	22.5707	22.4284
Card19	Q9D1I2	Q9D1I2	Caspase recruitment domain-containing protein 19	0	0	0	1.07497	1.46729	0.761469	1.23799	0.1043	0.553155	-0.393143	0.308	NaN	NaN	0.429084	0.346434	2	3	3	2	3	3	3	3	14.1534	13.7032	NaN	14.0691	14.2081	13.8205	12.527	14.3318	13.2373	13.0966	NaN	14.7405	16.1422	15.1482	14.6163	14.9222	14.8865	14.9187	14.0891	13.7073	13.4933	13.6771	14.0614
Card9	A2AIV8	A2AIV8	Caspase recruitment domain-containing protein 9	0	0	0	0.983975	1.12519	0.999127	0.894587	-0.0233067	0.17017	-0.00126	-0.160707	0.682183	0.164815	0.984952	0.233191	3	3	3	3	3	3	3	3	17.9338	17.9156	18.03	18.0113	17.9196	17.8787	18.5454	18.7455	18.5493	18.6485	18.7931	18.9092	19.2773	19.3948	19.2761	19.2511	19.2823	19.411	18.7262	18.7734	19.001	18.8265	18.5902
Carhsp1	Q9CR86	Q9CR86	Calcium-regulated heat stable protein 1	0	0	0	0.913916	0.866543	1.01897	0.695891	-0.129867	-0.206657	0.0271133	-0.523067	0.121059	0.225511	0.892505	0.128892	3	3	3	3	3	3	3	3	16.3251	16.5091	16.4606	16.2633	16.2669	16.375	17.127	17.1757	16.7644	16.9406	16.7362	16.7702	17.2109	17.0144	16.5957	16.9777	17.0496	16.8751	16.6099	16.481	16.4204	15.4444	16.2608
Carm1	Q9WVG6	Q9WVG6	Histone-arginine methyltransferase CARM1	0	0	0	1.18162	1.03943	0.943711	1.13163	0.240763	0.05579	-0.0835833	0.178403	0.281442	0.708552	0.549213	0.13327	3	3	3	3	3	3	3	3	16.243	16.2035	16.402	16.8905	16.321	16.3593	17.5417	17.4075	17.8542	17.7288	17.6596	17.5824	17.3886	17.3214	17.5359	17.5294	17.321	17.1448	17.0062	16.7635	16.8458	17.0419	17.1627
Carmil1	Q6EDY6	Q6EDY6	F-actin-uncapping protein LRRC16A	0	0	0	1.32168	0.907733	0.952187	0.761143	0.40237	-0.13966	-0.0706833	-0.39376	0.150555	0.105248	0.293117	0.222938	3	3	3	3	3	3	3	3	14.8513	14.839	14.9081	15.7028	15.1579	14.9448	16.3076	16.226	16.413	16.1222	16.1529	16.2526	16.3707	16.4265	16.2419	16.3153	16.2453	16.2664	16.112	15.9901	15.8446	15.0656	15.8196
Cars	Q9ER72	Q9ER72	Cysteine--tRNA ligase, cytoplasmic	0	0	0	0.88552	1.11455	1.20725	1.14305	-0.175403	0.15646	0.27173	0.192887	0.0742933	0.0667199	0.0737779	0.099614	3	3	3	3	3	3	3	3	18.3363	18.5253	18.4432	18.3523	18.1891	18.2372	19.2467	19.1112	19.2952	19.3494	19.3398	19.4333	19.2403	19.3296	19.318	19.4374	19.785	19.4807	18.6689	18.8972	18.6434	18.8918	19.0105
Cars2	Q8BYM8	Q8BYM8	Probable cysteine--tRNA ligase, mitochondrial	0	0	0	1.02675	0.611272	0.894002	1.09943	0.03808	-0.710113	-0.16165	0.13675	0.472278	0.0343072	0.357787	0.374954	3	3	3	3	3	3	3	3	15.0088	14.9225	14.8818	14.9373	14.9549	15.0351	16.3527	16.3179	16.7033	15.387	16.0218	15.8349	16.2485	16.2528	16.6812	16.3049	16.28	16.1127	15.5021	15.555	15.7049	15.9605	15.5477
Casd1	Q7TN73	Q7TN73	CAS1 domain-containing protein 1	0	0	1	NaN	1.08211	1.39705	2.15499	NaN	0.113853	0.482383	1.10768	NaN	0.339162	0.0384013	0.0178455	1	0	3	3	3	3	3	3	NaN	11.4475	NaN	NaN	NaN	NaN	13.9688	13.7129	13.9083	13.8743	14.1137	13.9434	13.9815	13.7519	14.059	14.6276	14.4306	14.1813	13.5517	13.3952	14.3115	14.9358	14.8144
Cask	O70589	O70589	Peripheral plasma membrane protein CASK	0	0	-1	0.94749	0.922892	0.784611	0.578947	-0.0778167	-0.115767	-0.34995	-0.788497	0.344845	0.338896	0.000454544	0.00478664	3	3	3	3	3	3	3	3	16.2618	16.3377	16.4716	16.3529	16.2199	16.2649	17.5261	17.4444	17.6863	17.5916	17.3279	17.3899	17.6155	17.5263	17.5597	17.2087	17.1867	17.2562	16.9815	17.0454	16.7392	16.1871	16.2797
Caskin1	Q6P9K8	Q6P9K8	Caskin-1	0	0	0	NaN	0.361765	0.88518	1.83028	NaN	-1.46688	-0.175957	0.872061	NaN	0.00565747	0.898583	0.52931	0	0	3	3	3	3	3	3	NaN	NaN	NaN	NaN	NaN	NaN	15.6313	15.2083	16.0743	14.0653	14.0668	14.3812	14.8634	11.9523	16.2477	14.5414	14.3648	13.6293	11.7104	11.1107	11.9964	13.7692	9.99761
Casp1	P29452	P29452	Caspase-1	0	0	0	1.00086	1.16603	1.18578	1.16176	0.00123667	0.221607	0.245833	0.216313	0.988327	0.0161966	0.0979302	0.0882456	3	3	3	3	3	3	3	3	17.6671	17.6278	17.7381	17.8144	17.6563	17.566	18.376	18.3668	18.2157	18.5797	18.5185	18.5252	18.5495	18.6401	18.2738	18.7928	18.6909	18.7172	18.0806	18.0261	18.2012	18.1615	18.4331
Casp3	P70677	P70677	Caspase-3	0	0	0	0.938516	1.11632	0.906285	0.784631	-0.0915467	0.158747	-0.141963	-0.349913	0.140678	0.232904	0.136528	0.0189108	3	3	3	3	3	3	3	3	18.6462	18.7444	18.8006	18.6784	18.6048	18.6334	19.2609	19.5406	19.3823	19.6102	19.6523	19.3975	19.527	19.6229	19.3761	19.4076	19.3188	19.3737	19.1294	19.1045	19.1031	18.6083	18.7545
Casp6	O08738	O08738	Caspase-6	0	0	0	0.93011	1.14536	1.13944	0.934338	-0.104527	0.1958	0.18833	-0.0979833	0.0550484	0.0250426	0.0606479	0.141177	3	3	3	3	3	3	3	3	18.0947	18.1184	18.2016	18.0618	18.048	17.9913	18.684	18.5558	18.6459	18.7575	18.8162	18.8995	18.5615	18.786	18.6909	18.9319	18.8273	18.8442	18.4127	18.508	18.4464	18.4435	18.2875
Casp7	P97864	P97864	Caspase-7	0	0	0	0.964034	1.45516	1.44051	0.973116	-0.0528433	0.54118	0.526583	-0.0393167	0.649958	0.00308331	0.0164927	0.718705	3	3	3	3	3	3	3	3	16.6906	16.5026	16.7371	16.7435	16.5585	16.4698	16.6957	16.8162	16.5488	17.2304	17.2869	17.167	16.9168	17.0126	16.5819	17.3776	17.3194	17.3941	16.5916	16.2431	16.4021	16.3609	16.357
Casp8	O89110	O89110	Caspase-8	0	0	0	0.91578	1.04738	0.88757	0.725652	-0.126927	0.06679	-0.172067	-0.46265	0.198598	0.29853	0.167086	0.000260464	3	3	3	3	3	3	3	3	19.0366	18.9434	19.1384	19.032	18.866	18.8396	19.5579	19.7066	19.5263	19.652	19.6747	19.6645	19.695	19.8604	19.6936	19.4892	19.4945	19.7491	19.3639	19.3479	19.4502	18.9616	18.8896
Casp9	Q8C3Q9	Q8C3Q9	Caspase-9	0	0	0	1.03722	0.789111	1.13153	1.52466	0.0527233	-0.3417	0.178273	0.60849	0.300768	0.685009	0.162507	0.000880472	3	3	3	3	3	3	3	3	14.6565	14.6226	14.569	14.739	14.65	14.6172	15.2063	17.2824	14.7598	15.2218	15.5217	15.4798	15.3417	15.5338	15.2273	15.6192	15.5772	15.4413	14.5302	14.5703	14.5612	15.2588	15.0329
Cast	P51125	P51125	Calpastatin	0	0	0	0.97364	1.0493	0.977763	0.85783	-0.03854	0.0694267	-0.0324433	-0.221237	0.7721	0.197936	0.651324	0.230984	3	3	3	3	3	3	3	3	15.9614	16.1809	16.2227	15.8945	16.1741	16.1808	18.1256	18.2046	18.0644	18.237	18.1959	18.17	18.5569	18.5119	18.3786	18.4424	18.3858	18.522	17.8402	17.4994	17.3208	17.2678	17.3957
Cat	P24270	P24270	Catalase	0	0	0	0.842549	0.975353	0.845035	1.08603	-0.247167	-0.0360033	-0.242917	0.11906	0.0206557	0.801907	0.00743001	0.428266	3	3	3	3	3	3	3	3	18.5418	18.7354	18.5541	18.3293	18.4066	18.3539	19.694	19.4886	19.5185	19.7628	19.3763	19.454	19.8044	19.7283	19.6531	19.5095	19.4437	19.5038	19.429	19.3305	19.0197	19.276	19.4661
Cav1	P49817	P49817	Caveolin-1	0	0	0	1.11478	0.831505	0.373299	0.990762	0.156763	-0.266203	-1.4216	-0.01339	0.716093	0.44435	0.00253007	0.977589	3	3	3	3	3	3	3	3	14.6248	15.1214	13.8922	14.3874	15.0235	14.6977	16.0614	16.0245	15.8623	15.491	15.3328	16.3258	16.5724	17.0048	17.287	15.6007	15.5246	15.4742	16.3097	15.4029	16.5085	15.8643	15.6829
Cav2	Q9WVC3	Q9WVC3	Caveolin-2	0	0	0	1.23825	0.916832	0.567399	1.53893	0.308302	-0.12527	-0.817563	0.62193	NaN	0.723381	0.0250834	0.539835	2	3	3	3	3	3	3	3	14.577	14.6051	NaN	14.7757	15.0758	14.8466	15.2902	15.5161	15.3583	14.7784	15.8751	15.1352	16.0255	15.9288	15.3429	14.7763	15.1108	14.9575	16.0221	15.5191	15.9275	18.2721	15.6465
Cbfb	Q08024	Q08024	Core-binding factor subunit beta	0	0	0	0.924322	1.29114	1.16015	0.990153	-0.113533	0.368647	0.214307	-0.0142767	0.189379	0.0148812	0.157276	0.812466	3	3	3	3	3	3	3	3	16.5309	16.31	16.4326	16.2791	16.3768	16.277	17.3617	17.2426	17.0759	17.5321	17.6014	17.6527	17.8046	18.0443	17.6346	17.9773	18.0641	18.085	17.3448	17.3721	17.2546	17.3945	17.2489
Cbl	P22682	P22682	E3 ubiquitin-protein ligase CBL	0	0	0	0.900343	0.89129	0.751763	1.19756	-0.151453	-0.166033	-0.41165	0.260093	0.0537164	0.0642334	0.0227961	0.0577875	3	3	3	3	3	3	3	3	17.2022	17.351	17.3435	17.1406	17.1025	17.1992	17.8457	18.0191	18.0225	17.7424	17.8446	17.8022	18.351	18.518	18.6756	18.1945	18.1393	17.9759	17.6449	17.4889	17.6515	17.7567	17.7885
Cbln1	Q9R171	Q9R171	Cerebellin-1	0	0	0	0.963798	1.72024	0.509084	0.274521	-0.0531967	0.78261	-0.974023	-1.86501	0.706583	0.0273048	0.00301501	0.000433832	3	3	3	3	3	3	3	3	15.7164	15.4685	15.684	15.3577	15.6798	15.6717	16.5585	16.2252	15.9064	16.8005	17.2565	16.9809	17.3407	17.3551	17.1771	16.1559	16.5967	16.1982	16.4548	16.9203	16.4133	14.6076	14.8181
Cbln4	Q8BME9	Q8BME9	Cerebellin-4	0	0	0	1.54736	1.31603	0.411805	0.38077	0.62981	0.396193	-1.27997	-1.39301	0.320563	0.0635404	0.000811067	0.0737828	3	3	3	3	3	3	3	3	14.8698	14.764	13.1984	15.0566	15.018	14.6471	15.2687	15.1474	15.1866	15.895	15.4952	15.4011	16.4948	16.6846	16.2768	15.0557	15.3119	15.2487	15.5535	16.0434	15.6267	13.2508	15.0746
Cbr1	P48758	P48758	Carbonyl reductase [NADPH] 1	0	0	0	0.961987	0.918268	0.860343	1.0431	-0.05591	-0.123013	-0.217017	0.0608833	0.532358	0.0140469	0.0128497	0.586047	3	3	3	3	3	3	3	3	20.371	20.3116	20.5169	20.4526	20.2799	20.2992	21.5875	21.5363	21.5355	21.4388	21.3849	21.4666	21.5376	21.4642	21.398	21.2644	21.1905	21.2939	20.8468	20.7792	20.8019	20.6912	21.0408
Cbr2	P08074	P08074	Carbonyl reductase [NADPH] 2	0	-1	0	0.987551	1.08219	0.462177	0.318567	-0.0180733	0.113957	-1.11348	-1.65033	0.914445	0.226176	0.00587626	0.000791032	3	3	3	3	3	3	3	3	19.9679	19.8371	20.1494	20.2252	19.8235	19.8515	19.6916	19.6003	19.633	19.6053	19.8319	19.8296	19.4175	19.6163	19.3519	17.9641	18.5308	18.5505	19.0399	18.9135	18.5365	17.3277	17.2175
Cbr3	Q8K354	Q8K354	Carbonyl reductase [NADPH] 3	0	0	0	0.964707	0.884841	0.870738	1.08711	-0.0518367	-0.17651	-0.19969	0.120493	0.568395	0.0823692	0.0366181	0.250265	3	3	3	3	3	3	3	3	19.5801	19.5356	19.6296	19.6869	19.4669	19.436	20.3751	20.1959	20.223	20.1929	20.0314	20.0401	20.3992	20.5672	20.425	20.2127	20.2411	20.3385	20.2425	20.2601	20.1343	20.2706	20.4927
Cbr4	Q91VT4	Q91VT4	Carbonyl reductase family member 4	0	0	0	0.985276	0.721336	0.75017	0.718837	-0.0214	-0.471257	-0.41471	-0.476263	0.626262	0.023276	0.000825324	0.00150886	3	3	3	3	3	3	3	3	17.2424	17.1981	17.2507	17.2784	17.1974	17.1512	17.9735	17.8307	18.0012	17.66	17.2437	17.488	18.1253	18.1267	18.0851	17.6357	17.6751	17.7821	17.7996	17.7742	17.7195	17.3889	17.2837
Cbx1	P83917	P83917	Chromobox protein homolog 1	0	0	0	1.07266	1.08509	0.900412	0.738773	0.101193	0.117813	-0.151343	-0.436797	0.726025	0.11515	0.262825	0.0663074	3	3	3	3	3	3	3	3	18.4634	18.5089	17.8063	18.1703	18.6446	18.2673	19.8455	19.9682	19.8358	19.9859	20.0772	19.9398	19.6988	19.8552	19.4966	19.541	19.618	19.4374	19.163	18.9902	18.7245	18.4308	18.758
Cbx3	P23198	P23198	Chromobox protein homolog 3	0	0	0	1.0632	1.13411	0.981631	0.922357	0.0884067	0.181567	-0.0267467	-0.116603	0.7041	0.0735055	0.826421	0.0571118	3	3	3	3	3	3	3	3	20.0109	20.0089	19.4878	19.7501	20.1762	19.8466	21.3249	21.4597	21.1993	21.5096	21.5013	21.5177	21.4571	21.5382	21.2107	21.4522	21.4119	21.2616	20.9077	20.8758	20.8006	20.6839	20.7713
Cbx5	Q61686	Q61686	Chromobox protein homolog 5	0	0	0	0.729817	1.43163	1.4653	1.37079	-0.454393	0.51766	0.5512	0.45501	0.202185	0.00964232	0.0328532	0.0944808	3	3	3	3	3	3	3	3	15.3796	15.6132	16.2463	15.4382	14.9962	15.4416	16.4602	16.2941	16.3047	17.0655	16.7782	16.7683	15.94	16.4322	16.3035	16.7741	16.9318	16.6234	16.0856	15.5656	15.4787	16.0699	16.0863
Cc2d1a	Q8K1A6	Q8K1A6	Coiled-coil and C2 domain-containing protein 1A	0	0	0	0.95549	0.868084	1.15544	1.41545	-0.0656867	-0.204093	0.20844	0.501257	0.67297	0.46083	0.326158	0.0552032	3	3	3	3	3	3	3	3	14.4823	14.3151	14.5427	14.1267	14.523	14.4934	15.2772	15.5454	15.7464	14.9911	15.7111	15.2545	15.6467	16.0345	16.0717	15.9987	15.9982	16.3813	15.1051	14.8569	15.0625	15.804	15.2131
Cc2d1b	Q8BRN9	Q8BRN9	Coiled-coil and C2 domain-containing protein 1B	0	-1	0	1.14352	0.805191	0.677362	0.553799	0.193483	-0.312597	-0.562	-0.852567	0.166348	0.0618871	0.00775034	0.00164112	3	3	3	3	3	3	3	3	16.1949	16.1839	16.4955	16.4141	16.5861	16.4545	17.335	17.6561	17.4533	17.0427	17.3096	17.1542	17.7842	17.8942	17.6725	17.277	17.0389	17.3491	17.1665	17.3994	17.4165	16.5785	16.3202
Ccar1	Q8CH18	Q8CH18	Cell division cycle and apoptosis regulator protein 1	0	0	0	1.30614	1.16036	1.11815	1.14733	0.385307	0.214567	0.161117	0.198287	0.303617	0.0754268	0.253947	0.459091	3	3	3	3	3	3	3	3	16.4484	16.6014	15.6007	16.4359	16.7799	16.5907	17.6991	17.7281	17.6502	17.7451	17.933	18.043	18.2051	18.4137	18.0429	18.3987	18.469	18.2774	17.5853	17.8029	17.3607	17.4003	18.1074
Ccar2	Q8VDP4	Q8VDP4	Cell cycle and apoptosis regulator protein 2	0	0	0	1.19489	1.17169	1.12142	1.11444	0.256877	0.228593	0.16533	0.156317	0.47762	0.0366586	0.102489	0.26816	3	3	3	3	3	3	3	3	16.9876	17.2286	16.1539	17.0643	17.1087	16.9676	18.1059	18.1715	18.0101	18.4157	18.2188	18.3388	18.4616	18.3108	18.2194	18.5121	18.5451	18.4306	18.0365	17.9872	17.6783	18.1488	18.0303
Ccdc115	Q8VE99	Q8VE99	Coiled-coil domain-containing protein 115	0	0	0	0.998562	1.22831	1.27703	1.21349	-0.00207667	0.296673	0.352793	0.279157	0.970294	0.061317	0.0834636	0.0227461	3	3	3	3	3	3	3	3	16.5765	16.5827	16.6441	16.5156	16.681	16.6005	17.6197	17.7685	17.4179	18.0063	17.8424	17.8473	17.7414	17.783	17.3185	18.0256	17.9858	17.8898	17.1468	17.1438	16.9947	17.4109	17.4532
Ccdc12	Q8R344	Q8R344	Coiled-coil domain-containing protein 12	0	0	0	0.952992	1.18534	0.950284	1.05837	-0.0694633	0.245307	-0.07357	0.0818433	0.423725	0.0860901	0.419799	0.572257	3	3	3	3	3	3	3	3	16.3182	16.489	16.3568	16.428	16.2993	16.2282	17.4733	17.6173	17.3291	17.59	17.7383	17.8274	17.7095	17.8226	17.6685	17.7641	17.6828	17.533	17.3262	17.2866	17.3036	17.1321	17.5784
Ccdc124	Q9D8X2	Q9D8X2	Coiled-coil domain-containing protein 124	0	0	-1	0.992187	0.839446	0.685288	0.359804	-0.0113167	-0.25249	-0.545217	-1.47472	0.928777	0.0249343	0.0348646	0.0186357	3	3	3	3	3	3	3	3	15.1095	15.0979	14.8022	15.0544	15.0564	14.8648	17.0823	17.2905	17.0872	16.9044	16.9378	16.8604	17.1509	17.1809	17.2358	16.5456	16.4079	16.9784	16.5656	16.6518	16.5692	15.8331	14.5154
Ccdc127	Q3TC33	Q3TC33	Coiled-coil domain-containing protein 127	0	0	0	1.44596	0.742435	0.812543	0.972716	0.532027	-0.429663	-0.299483	-0.03991	0.165302	0.0358919	0.0575847	0.860255	3	3	3	3	3	3	3	3	14.4667	14.7706	14.0313	14.5002	15.1333	15.2311	16.8768	16.9489	17.2963	16.5501	16.5766	16.7062	17.0369	16.9865	17.2825	16.8743	16.8649	16.6683	15.951	15.9835	16.518	15.9466	16.3116
Ccdc134	Q8C7V8	Q8C7V8	Coiled-coil domain-containing protein 134	0	0	0	0.926089	0.995118	0.90617	0.703657	-0.110777	-0.00706	-0.142147	-0.507057	0.167263	0.748378	0.243056	0.0764399	3	3	3	3	3	3	3	3	15.7078	15.9141	15.7865	15.6624	15.6686	15.7451	16.558	16.5755	16.5175	16.5522	16.521	16.5567	16.9162	16.8504	16.598	16.7195	16.6199	16.5987	16.3695	16.506	16.2696	15.8018	15.5664
Ccdc167	Q9D162	Q9D162	Coiled-coil domain-containing protein 167	0	0	0	1.18312	1.99937	0.696592	0.364174	0.2426	0.999543	-0.521615	-1.4573	NaN	0.314218	NaN	NaN	2	3	3	3	2	3	2	3	16.4489	NaN	16.5152	16.9907	16.3473	16.8361	14.1851	12.1212	15.0433	14.8916	14.7677	14.6888	NaN	15.6944	15.5826	14.3248	15.2035	15.8224	15.7437	15.0057	NaN	14.2242	13.8867
Ccdc177	Q3UHB8	Q3UHB8	Coiled-coil domain-containing protein 177	0	0	0	NaN	NaN	0.858655	1.15038	NaN	NaN	-0.21985	0.20211	NaN	NaN	NaN	0.784197	0	0	0	0	2	1	3	3	NaN	NaN	NaN	NaN	NaN	NaN	NaN	NaN	NaN	NaN	NaN	NaN	12.2462	NaN	12.8842	12.3453	NaN	NaN	11.5187	11.7898	13.3753	12.8156	11.679
Ccdc18	Q640L5	Q640L5	Coiled-coil domain-containing protein 18	0	0	0	0.973896	0.981575	0.917434	1.25414	-0.03816	-0.02683	-0.124323	0.326702	0.568234	0.969854	0.620881	NaN	3	3	3	3	3	3	3	2	20.4387	20.603	20.59	20.558	20.5103	20.4489	22.6655	21.3028	21.8453	21.5268	21.2346	22.9717	22.8952	23.07	23.4216	22.6626	23.2235	23.1277	22.4994	22.6089	22.8041	22.9174	NaN
Ccdc22	Q9JIG7	Q9JIG7	Coiled-coil domain-containing protein 22	0	0	0	0.972518	1.05045	0.895948	0.752809	-0.0402033	0.07101	-0.158513	-0.409643	0.760102	0.37925	0.218239	0.00127862	3	3	3	3	3	3	3	3	18.2385	18.0833	18.0879	18.3192	18.0029	17.9669	18.7688	18.9354	18.7586	18.9652	18.815	18.8956	19.13	19.3883	19.0443	18.9885	19.0035	19.0951	18.8739	18.9497	18.7936	18.5072	18.4525
Ccdc25	Q78PG9	Q78PG9	Coiled-coil domain-containing protein 25	0	0	0	0.867601	1.00709	1.04302	1.10357	-0.204897	0.0101933	0.0607633	0.142177	0.143141	0.763184	0.258707	0.279931	3	3	3	3	3	3	3	3	15.4394	15.4973	15.6588	15.1463	15.3908	15.4437	16.2777	16.2332	16.2471	16.298	16.2847	16.2059	16.4212	16.3848	16.3934	16.4723	16.5318	16.3777	15.6567	15.5943	15.9207	15.9542	15.7667
Ccdc30	Q8BVF4	Q8BVF4	Coiled-coil domain-containing protein 30	0	0	-1	0.858601	0.858669	0.833918	0.613353	-0.21994	-0.219827	-0.262023	-0.70521	0.111883	0.0766948	0.0617689	0.0330047	3	3	3	3	3	3	3	3	18.7615	19.0368	18.9186	18.6509	18.8261	18.58	20.2429	20.4702	20.2883	20.0147	20.101	20.2262	20.2193	20.2858	20.2022	20.0009	19.7911	20.1293	19.7867	19.5451	19.5458	18.5099	19.1346
Ccdc32	Q8BS39	Q8BS39	Uncharacterized protein C15orf57 homolog	0	0	0	NaN	NaN	1.8652	NaN	NaN	NaN	0.899334	NaN	NaN	NaN	NaN	NaN	0	0	0	1	2	2	0	1	NaN	NaN	NaN	NaN	NaN	NaN	NaN	NaN	NaN	NaN	NaN	10.7109	9.09639	10.2443	NaN	10.0584	11.081	NaN	NaN	NaN	NaN	NaN	11.2526
Ccdc43	Q9CR29	Q9CR29	Coiled-coil domain-containing protein 43	0	0	0	0.974261	1.21498	0.772957	0.416856	-0.03762	0.280937	-0.37154	-1.26238	0.744924	0.101974	0.150534	0.028759	3	3	3	3	3	3	3	3	14.5996	14.6979	14.9095	14.8126	14.6439	14.6377	15.5698	15.5625	15.6572	15.9176	16.0786	15.636	15.5056	15.9337	15.7397	15.1114	15.2739	15.6791	14.8493	14.8858	15.1062	13.1948	14.4077
Ccdc47	Q9D024	Q9D024	Coiled-coil domain-containing protein 47	0	0	0	0.938659	1.07834	0.951019	1.15423	-0.0913267	0.108813	-0.0724533	0.206937	0.00323254	0.146357	0.224829	0.059441	3	3	3	3	3	3	3	3	17.5171	17.4746	17.5086	17.4052	17.3998	17.4212	18.2646	18.3689	18.2259	18.4738	18.3264	18.3855	18.6357	18.6061	18.5389	18.5331	18.5864	18.4438	18.1048	18.0749	18.0931	18.1679	18.2856
Ccdc50	Q810U5	Q810U5	Coiled-coil domain-containing protein 50	0	0	-1	1.00018	0.909955	0.897867	0.667096	0.000256667	-0.136133	-0.155427	-0.584033	0.996822	0.134517	0.146216	0.00223735	3	3	3	3	3	3	3	3	17.0994	17.1083	17.2803	17.1431	17.1551	17.1905	18.9041	19.083	18.8695	18.7603	18.8642	18.8237	18.864	18.917	18.6446	18.61	18.6639	18.6854	18.158	18.0423	17.8826	17.4605	17.393
Ccdc51	Q3URS9	Q3URS9	Coiled-coil domain-containing protein 51	0	0	0	1.14212	0.726993	0.941274	0.91159	0.19171	-0.459987	-0.0873133	-0.133543	0.243275	0.00537533	0.633137	0.0968397	3	3	3	3	3	3	3	3	14.8456	14.9806	14.5243	15.0093	14.9019	15.0143	16.3062	16.3122	16.4324	15.9965	15.7502	15.9242	16.3118	16.0224	16.5683	16.1852	16.3314	16.124	15.7076	15.6724	15.6514	15.6626	15.4897
Ccdc53	Q9CR27	Q9CR27	WASH complex subunit CCDC53	0	0	0	1.00385	1.04817	0.996658	0.933473	0.00553667	0.06787	-0.00483	-0.09932	0.955461	0.426817	0.967816	0.601123	3	3	3	3	3	3	3	3	17.5363	17.5139	17.5282	17.7153	17.4646	17.4151	17.8394	17.8471	17.6444	17.7692	17.8681	17.8972	18.2901	18.3515	17.9889	18.2127	18.2188	18.1845	17.8269	17.8407	17.4694	17.3686	17.7898
Ccdc57	Q6PHN1	Q6PHN1	Coiled-coil domain-containing protein 57	0	0	0	0.953584	0.647439	1.59828	NaN	-0.0685683	-0.627183	0.676517	NaN	NaN	NaN	0.0375463	NaN	2	3	3	2	3	3	0	0	12.6068	12.7571	NaN	12.4497	12.8937	12.4967	14.3279	13.3689	14.2978	13.7056	NaN	13.0365	12.3648	12.7671	13.0701	13.2446	13.4703	13.5167	NaN	NaN	NaN	NaN	NaN
Ccdc58	Q8R3Q6	Q8R3Q6	Coiled-coil domain-containing protein 58	0	0	0	0.963162	0.82894	1.00823	1.27432	-0.05415	-0.27066	0.01183	0.349727	0.626059	0.0132321	0.923888	0.102446	3	3	3	3	3	3	3	3	16.7365	16.7609	16.8061	16.913	16.5887	16.6394	17.9146	17.854	17.9271	17.7129	17.5129	17.658	17.8021	17.6036	17.8311	17.7457	17.9219	17.6046	17.1242	17.0849	16.9594	17.0897	17.5625
Ccdc6	D3YZP9	D3YZP9	Coiled-coil domain-containing protein 6	0	0	0	1.07566	1.05052	1.17416	1.23968	0.10522	0.07111	0.231627	0.309967	0.423415	0.206926	0.0213661	0.0648187	3	3	3	3	3	3	3	3	16.8883	17.0119	16.6137	16.9266	16.9623	16.9407	18.2259	18.3362	18.3165	18.3763	18.302	18.4138	18.3645	18.4442	18.4269	18.6683	18.7297	18.5325	18.0343	18.1206	18.0837	18.6151	18.2056
Ccdc60	Q8C4J0	Q8C4J0	Coiled-coil domain-containing protein 60	0	0	0	0.93954	1.22781	0.8125	1.21381	-0.0899733	0.29609	-0.29956	0.279543	0.39083	0.0238054	0.259415	0.156208	3	3	3	3	3	3	3	3	19.0096	18.9213	18.8951	19.0184	18.8125	18.7251	17.8235	18.0194	17.8278	18.2002	18.0887	18.2699	18.2278	18.2474	18.9172	18.2125	18.122	18.1593	18.4234	17.8763	18.1311	18.4463	18.3693
Ccdc7	Q9D541	Q9D541	Coiled-coil domain-containing protein 7	0	0	0	0.997317	0.748766	1.38311	1.15577	-0.00387667	-0.417413	0.467917	0.208857	NaN	0.401539	0.0915687	0.272014	3	2	3	3	3	3	3	3	13.0097	13.913	14.2218	NaN	13.833	13.5889	16.2404	15.2562	16.3148	15.2327	16.0918	15.2347	15.0248	14.4088	14.5102	15.2992	15.0355	15.0129	15.6488	15.4004	15.6358	15.486	15.8906
Ccdc88a	Q5SNZ0	Q5SNZ0	Girdin	0	0	-1	1.04292	1.00554	0.875934	0.443242	0.0606233	0.00796667	-0.191107	-1.17383	0.899193	0.897579	0.103105	0.00052445	3	3	3	3	3	3	3	3	15.9336	14.6004	15.1631	15.6022	14.8451	15.4317	17.2466	17.3509	17.2685	17.2005	17.3575	17.3319	17.3431	17.2087	17.1059	16.9593	16.9787	17.1464	17.142	17.0544	16.7877	15.8448	15.8824
Ccdc88b	Q4QRL3	Q4QRL3	Coiled-coil domain-containing protein 88B	0	0	0	1.09555	0.990691	0.936528	0.771633	0.13166	-0.0134933	-0.0946067	-0.374013	0.436238	0.901494	0.331011	0.090911	3	3	3	3	3	3	3	3	16.3436	16.5683	16.0638	16.5334	16.382	16.4552	17.4653	17.4831	17.3441	17.2526	17.4264	17.5729	17.7297	17.9127	17.6382	17.6902	17.6087	17.6978	17.6657	17.7247	17.5388	16.9748	17.5231
Ccdc88c	Q6VGS5	Q6VGS5	Protein Daple	0	0	0	1.00226	1.18035	1.24142	1.00417	0.00325333	0.239213	0.311993	0.00599667	0.983187	0.000189056	0.0263955	0.965086	3	3	3	3	3	3	3	3	16.4132	16.5016	16.3603	16.6961	16.3596	16.2291	17.0211	17.0375	17.0081	17.2934	17.246	17.245	17.4627	17.6308	17.4041	17.7442	17.758	17.9315	17.3662	17.4209	17.048	17.352	17.1746
Ccdc9	Q8VC31	Q8VC31	Coiled-coil domain-containing protein 9	0	0	0	0.965695	1.14328	0.920785	0.925679	-0.05036	0.193177	-0.119063	-0.111417	0.873777	0.546414	0.475521	0.239976	3	3	3	3	3	3	3	3	15.1002	14.8408	14.2339	14.3961	14.7158	14.9119	15.3939	15.9637	15.276	15.6997	16.1062	15.4072	15.9671	16.252	16.1856	16.2364	16.0056	15.8055	15.6722	15.5565	15.7904	15.6389	15.4852
Ccdc90b	Q8C3X2	Q8C3X2	Coiled-coil domain-containing protein 90B, mitochondrial	0	0	0	0.927839	0.925978	0.817299	0.856014	-0.108053	-0.11095	-0.291063	-0.224293	0.356165	0.00900024	0.0201776	0.336228	3	3	3	3	3	3	3	3	18.4506	18.5272	18.4954	18.5845	18.3004	18.2641	19.2828	19.2788	19.2267	19.1242	19.1749	19.1563	19.6166	19.5548	19.4209	19.2852	19.2984	19.1355	18.8052	18.8604	18.2964	18.544	18.2307
Ccdc91	Q9D8L5	Q9D8L5	Coiled-coil domain-containing protein 91	0	0	0	0.960191	1.09657	1.06868	1.42273	-0.0586067	0.132997	0.0958333	0.50866	0.509893	0.243283	0.597835	0.132102	3	3	3	3	3	3	3	3	13.9027	13.8424	13.9589	13.9449	13.884	13.6994	15.4812	15.6877	15.4537	15.7841	15.5649	15.6726	15.771	15.8053	16.1487	16.0844	16.1531	15.7751	15.2361	15.443	15.4837	16.3865	15.5099
Ccdc93	Q7TQK5	Q7TQK5	Coiled-coil domain-containing protein 93	0	0	0	0.971328	0.90609	0.81272	0.819459	-0.04197	-0.142273	-0.29917	-0.287257	0.591695	0.0148826	0.00322269	0.0109749	3	3	3	3	3	3	3	3	19.4677	19.4254	19.6088	19.5398	19.3801	19.4562	20.4996	20.5496	20.4712	20.3124	20.3927	20.3884	20.7326	20.8242	20.6606	20.4446	20.4357	20.4396	20.1567	20.196	20.1486	19.756	19.9282
Ccdc94	Q9D6J3	Q9D6J3	Coiled-coil domain-containing protein 94	0	0	0	0.861839	2.21394	2.33137	2.3254	-0.21451	1.14662	1.22118	1.21748	0.375033	0.231104	0.23167	0.161563	3	3	3	3	3	3	3	3	13.8438	14.377	13.8356	13.6994	14.0418	13.6716	14.7294	14.7746	15.4969	15.3189	17.693	15.4288	15.4179	15.5621	15.4503	17.5153	17.6111	14.9674	14.9076	14.7866	14.8283	17.4726	15.4436
Ccm2	Q8K2Y9	Q8K2Y9	Cerebral cavernous malformations protein 2 homolog	0	0	-1	0.986529	1.0753	0.858413	0.562432	-0.0195667	0.104733	-0.220257	-0.83025	0.794513	0.518357	0.110485	0.0326764	3	3	3	3	3	3	3	3	14.5768	14.4769	14.6358	14.4382	14.6019	14.5907	15.2113	15.683	15.3486	15.4953	15.6114	15.4504	15.9568	16.0835	15.735	15.6976	15.6478	15.7692	15.3179	15.5771	15.2942	15.0154	14.4998
Ccnd1	P25322	P25322	G1/S-specific cyclin-D1	0	0	-1	0.877465	1.35276	0.73907	0.403564	-0.188587	0.435903	-0.436217	-1.30913	0.129281	0.0271362	0.120711	0.000222636	3	3	3	3	3	3	3	3	14.0616	13.9585	13.9299	13.9083	13.86	13.6159	14.5127	14.7633	14.4196	14.8522	15.1058	15.0454	15.0962	15.0666	14.5098	14.4655	14.6453	14.2532	14.8853	14.8775	14.8612	13.3801	13.7359
Ccnk	O88874	O88874	Cyclin-K	0	0	1	1.04134	1.5077	1.17671	1.7777	0.0584367	0.592353	0.234763	0.83001	0.75834	0.240408	0.086578	0.00061514	3	3	3	3	3	3	3	3	14.6825	14.6861	14.1987	14.4362	14.644	14.6625	13.6096	15.0214	14.6952	15.1271	15.0325	14.9437	14.8354	15.0983	14.9147	15.1703	15.3095	15.0729	14.6835	14.4457	14.6153	15.3203	15.4778
Ccny	Q8BGU5	Q8BGU5	Cyclin-Y	0	0	0	0.945422	0.905149	0.960546	1.68041	-0.08097	-0.143773	-0.0580733	0.748817	0.21342	0.227723	0.83314	0.00132117	3	3	3	3	3	3	3	3	16.308	16.364	16.3781	16.3148	16.1684	16.3239	17.6675	17.6982	17.9506	17.5356	17.6696	17.6798	17.6881	17.6015	17.8709	18.0582	17.7162	17.2118	17.0779	17.1911	17.3332	17.9427	17.8538
Ccr5	P51682	P51682	C-C chemokine receptor type 5	0	0	0	0.946403	0.769902	0.538837	0.669671	-0.0794733	-0.377253	-0.89208	-0.578477	0.568458	0.11385	0.0185717	0.148536	3	3	3	3	3	3	3	3	15.9005	16.1112	16.2737	15.9172	15.9817	16.1481	16.0013	16.4034	16.3271	16.0107	16.0039	15.5855	16.4845	16.8562	16.648	15.7249	15.4385	16.149	15.5355	14.9758	14.8829	14.4863	14.1543
Ccs	Q9WU84	Q9WU84	Copper chaperone for superoxide dismutase	0	0	0	1.0473	1.02948	1.11511	1.10936	0.0666767	0.0419167	0.157187	0.14973	0.708833	0.373156	0.0303691	0.220897	3	3	3	3	3	3	3	3	16.7064	16.294	16.819	16.7503	16.6796	16.5895	17.4656	17.3684	17.4384	17.5258	17.4284	17.4439	17.3821	17.4732	17.343	17.6126	17.5212	17.5361	17.4996	17.3008	17.2743	17.3612	17.6081
Ccsmst1	Q6RUT7	Q6RUT7	Protein CCSMST1	0	0	0	1.24967	0.700631	0.736985	0.810578	0.32155	-0.513273	-0.440293	-0.302977	NaN	0.0121961	0.0876327	0.0299893	2	2	3	3	3	3	3	3	NaN	13.9414	14.0198	14.2952	NaN	14.3091	15.9187	16.18	16.2975	15.659	15.6538	15.5436	16.2362	15.9106	16.5278	15.9161	15.7996	15.6379	15.4541	15.5857	15.4021	15.325	15.1124
Cct2	P80314	P80314	T-complex protein 1 subunit beta	0	0	0	0.994868	1.0702	1.0949	1.06543	-0.00742333	0.0978767	0.130803	0.09143	0.935112	0.171993	0.0196906	0.133368	3	3	3	3	3	3	3	3	20.3982	20.3341	20.3502	20.5196	20.2845	20.2563	20.482	20.5389	20.4806	20.6154	20.4945	20.6851	20.8563	20.8319	20.9409	21.0241	20.9871	21.0102	20.4782	20.4482	20.4724	20.6524	20.4998
Cct3	P80318	P80318	T-complex protein 1 subunit gamma	0	0	0	0.981904	0.933658	0.964641	0.965466	-0.0263467	-0.0990333	-0.0519367	-0.0507033	0.851084	0.258799	0.401594	0.61041	3	3	3	3	3	3	3	3	20.8715	20.9553	20.7928	21.0923	20.7118	20.7364	21.3262	21.1731	21.3015	21.2381	21.0518	21.2138	21.6575	21.6141	21.6852	21.6444	21.4979	21.6587	21.4052	21.2052	21.2516	21.2814	21.3276
Cct4	P80315	P80315	T-complex protein 1 subunit delta	0	0	0	0.981831	1.0067	1.07127	1.12453	-0.0264533	0.00962667	0.0993233	0.16932	0.439858	0.78727	0.000803366	0.0200045	3	3	3	3	3	3	3	3	20.474	20.4067	20.4544	20.4544	20.3743	20.4271	21.3109	21.2414	21.3418	21.3174	21.2778	21.3277	21.4585	21.4563	21.4734	21.5727	21.5704	21.5432	20.8722	20.8057	20.8831	20.9467	21.0645
Cct5	P80316	P80316	T-complex protein 1 subunit epsilon	0	0	0	0.969563	1.10562	1.07099	1.12216	-0.0445933	0.14485	0.09894	0.166283	0.634809	0.0302289	0.0681461	0.0641251	3	3	3	3	3	3	3	3	20.2472	20.202	20.3929	20.3579	20.1356	20.2147	21.3142	21.2651	21.268	21.4839	21.4505	21.3474	21.1014	21.1188	21.0416	21.2507	21.1572	21.1507	20.448	20.3107	20.2986	20.4325	20.5824
Cct6a	P80317	P80317	T-complex protein 1 subunit zeta	0	0	0	0.970235	1.00205	1.08097	1.16216	-0.0435933	0.00296	0.11232	0.216813	0.70405	0.936965	0.110444	0.0338464	3	3	3	3	3	3	3	3	19.6281	19.6528	19.8507	19.8274	19.5849	19.5884	21.0023	20.9077	20.9491	20.955	20.9947	20.9183	20.7818	20.8195	20.7619	20.9843	20.9116	20.8043	20.0359	19.9406	19.9169	20.0691	20.2622
Cct6b	Q61390	Q61390	T-complex protein 1 subunit zeta-2	0	0	0	1.04344	0.598506	0.821888	1.09475	0.0613433	-0.740563	-0.282987	0.130603	0.587785	0.00335984	0.310771	0.74654	3	3	3	3	3	3	3	3	16.7565	16.5286	16.7059	16.8797	16.6298	16.6655	17.4334	17.5162	17.8117	16.7922	16.8961	16.8513	17.5107	17.0312	17.5461	17.323	16.7309	17.1851	16.5407	17.536	17.0266	16.796	17.0725
Cct7	P80313	P80313	T-complex protein 1 subunit eta	0	0	0	0.978789	1.07281	1.05965	1.12623	-0.03093	0.10139	0.0835867	0.171497	0.735968	0.139483	0.0166045	0.0357273	3	3	3	3	3	3	3	3	20.0211	20.0354	20.1295	20.1844	19.9254	19.9834	20.8657	20.7219	20.8975	20.9163	20.9512	20.9217	20.9403	20.9504	20.9216	21.0589	21.0084	20.9957	20.6243	20.6261	20.5113	20.6805	20.8114
Cct8	P42932	P42932	T-complex protein 1 subunit theta	0	0	0	0.974241	1.05148	1.1178	1.11426	-0.03765	0.07242	0.160663	0.156083	0.530122	0.0247551	0.000717057	0.0529457	3	3	3	3	3	3	3	3	20.4899	20.503	20.5407	20.5771	20.4384	20.4051	21.1792	21.2107	21.1875	21.2447	21.3016	21.2484	21.3019	21.314	21.3153	21.5035	21.4489	21.4609	20.8754	20.8481	20.8761	21.068	21.0898
Ccz1	Q8C1Y8	Q8C1Y8	Vacuolar fusion protein CCZ1 homolog	0	0	0	1.07838	0.955833	0.810726	0.994649	0.10887	-0.06517	-0.302713	-0.00774	0.592039	0.581585	0.00423913	0.969065	3	3	3	3	3	3	3	3	16.5979	16.3817	16.6592	16.8719	16.3262	16.7672	17.1356	17.2257	17.461	17.1472	17.3065	17.1731	17.6593	17.6966	17.8188	17.4164	17.3931	17.4571	17.0924	16.6841	17.0618	17.1249	16.6785
Cd14	P10810	P10810	Monocyte differentiation antigen CD14	0	0	0	1.72357	0.957353	4.72966	3.85632	0.785403	-0.0628767	2.24174	1.94722	0.586577	0.952496	0.0116619	0.0365792	3	3	3	3	3	3	3	3	12.5169	12.0671	15.1086	13.009	13.1596	15.8802	15.4427	13.9941	12.7746	13.1452	13.6581	15.2195	13.2336	14.4784	13.1552	15.8829	15.3791	16.3304	13.893	12.664	14.3845	15.2162	16.3302
Cd151	O35566	O35566	CD151 antigen	0	0	0	1.00452	0.704584	0.901121	0.493842	0.00650333	-0.505157	-0.150207	-1.01788	0.934952	0.221356	0.634857	0.204848	3	3	3	3	3	3	3	3	14.3448	14.3765	14.4885	14.5298	14.3324	14.367	14.6393	14.9991	14.113	13.6859	14.0488	14.5012	14.6351	14.9863	14.045	14.517	14.4955	14.2033	15.1706	13.9768	14.1274	14.4692	13.1747
Cd163	Q2VLH6	Q2VLH6	Scavenger receptor cysteine-rich type 1 protein M130	0	0	0	1.04667	0.923214	0.569115	1.21333	0.0658	-0.115263	-0.813207	0.278977	0.680195	0.548574	0.00767221	0.582096	3	3	3	3	3	3	3	3	14.8132	15.262	15.224	15.172	15.2257	15.099	15.4062	15.2411	15.3435	14.8862	15.4505	15.3082	15.6556	15.5822	15.4695	14.8854	14.9342	14.4481	15.7258	15.2493	15.1542	16.2819	15.8569
Cd177	Q8R2S8	Q8R2S8	CD177 antigen	0	0	0	0.652369	1.26991	1.06618	NaN	-0.61624	0.344727	0.09245	NaN	NaN	0.245137	0.798363	NaN	2	2	3	3	3	3	3	0	NaN	11.3268	11.7409	NaN	10.5173	11.3178	14.2901	14.119	14.4863	14.1835	14.8872	14.8589	13.2337	13.2679	12.3576	13.1573	13.2512	12.728	12.2393	12.0834	12.1081	NaN	NaN
Cd180	Q62192	Q62192	CD180 antigen	1	0	0	0.912762	1.57535	2.00533	2.49861	-0.13169	0.655673	1.00384	1.32113	0.119151	0.0127858	0.00194201	0.000250336	3	3	3	3	3	3	3	3	20.4063	20.4728	20.5183	20.4422	20.3171	20.243	20.4366	20.7972	20.6175	21.0578	21.3253	21.4352	20.9078	21.1439	20.7463	22.0886	21.8831	21.8378	21.0308	20.9526	20.8535	22.3679	22.0783
Cd1d1	P11609	P11609	Antigen-presenting glycoprotein CD1d1	0	0	0	1.57887	0.691162	1.46825	1.06226	0.658897	-0.532903	0.5541	0.0871417	0.12908	0.313932	0.223687	NaN	3	3	3	3	3	3	3	2	13.9212	13.3727	13.7949	14.9577	14.1095	13.9984	16.5372	14.9529	15.5849	15.2469	15.0768	15.1526	15.668	14.7953	15.289	16.3828	15.5719	15.4599	15.4052	15.5202	15.8618	NaN	15.4854
Cd200	O54901	O54901	OX-2 membrane glycoprotein	0	0	0	1.12366	0.576386	0.675721	1.38539	0.168203	-0.794893	-0.5655	0.47029	0.321755	0.0997867	0.300437	0.267475	3	3	3	3	3	3	3	3	14.1182	14.2746	14.1008	14.2266	14.1647	14.6069	17.288	16.8096	17.8249	16.8337	16.0675	16.6366	16.6529	16.3859	17.4422	16.7798	16.4221	15.5825	15.1052	15.9134	16.1972	16.5308	16.0062
Cd22	P35329	P35329	B-cell receptor CD22	0	0	0	NaN	1.10144	0.778985	2.67064	NaN	0.139397	-0.360333	1.41718	NaN	0.839011	0.680902	0.0345508	2	0	3	3	3	3	3	3	NaN	10.4038	11.65	NaN	NaN	NaN	13.4848	13.7758	15.4406	14.2346	14.1064	14.7784	16.2928	13.5668	15.4026	14.8378	14.8872	14.4562	13.7223	14.8289	15.1987	15.9132	16.1525
Cd2ap	Q9JLQ0	Q9JLQ0	CD2-associated protein	0	0	0	0.953891	1.08238	1.00914	0.859274	-0.0681033	0.114207	0.0131267	-0.21881	0.413432	0.0995452	0.901541	0.0274548	3	3	3	3	3	3	3	3	18.9003	18.8733	18.9058	18.962	18.8051	18.708	19.6145	19.6433	19.5764	19.6319	19.7429	19.8019	19.8941	20.0513	19.7093	19.9123	19.909	19.8727	19.5855	19.5381	19.5339	19.456	19.2932
Cd2bp2	Q9CWK3	Q9CWK3	CD2 antigen cytoplasmic tail-binding protein 2	0	0	0	1.04151	1.43565	1.34236	1.48318	0.0586733	0.521703	0.424773	0.56869	0.663727	0.0591218	0.182979	0.0275031	3	3	3	3	3	3	3	3	15.1942	15.3817	14.9941	15.277	15.3286	15.1404	15.3516	15.8907	15.2564	15.9763	16.0136	16.0739	16.3379	16.3936	15.6896	16.399	16.4602	16.8361	15.6392	15.6994	15.217	15.9452	16.1464
Cd300a	Q6SJQ0	Q6SJQ0	CMRF35-like molecule 8	0	0	0	1.02622	1.10537	0.809218	1.02004	0.0373467	0.144527	-0.3054	0.02863	0.784079	0.203435	0.0189033	0.83672	3	3	3	3	3	3	3	3	14.841	15.0153	14.6843	15.017	14.7279	14.9078	16.9978	16.9056	16.8731	16.9907	17.2448	16.9745	16.2449	16.3742	16.2211	16.1035	15.9081	15.9124	14.9176	14.8436	14.6559	14.6348	14.9871
Cd302	Q9DCG2	Q9DCG2	CD302 antigen	0	0	0	1.35161	0.787216	0.746883	0.335045	0.434675	-0.345168	-0.421047	-1.57757	NaN	NaN	NaN	NaN	2	1	3	2	2	3	3	2	NaN	12.4417	13.4847	NaN	NaN	13.3978	15.4462	15.1826	15.1079	15.3044	14.4963	NaN	NaN	15.6676	15.6224	14.9974	15.3895	15.2849	14.9114	15.5434	15.0409	13.1532	14.022
Cd34	Q64314	Q64314	Hematopoietic progenitor cell antigen CD34	0	0	0	0.902766	1.19884	1.66362	1.25579	-0.147577	0.261643	0.73433	0.328597	0.200688	0.168489	0.000354305	0.0716047	3	3	3	3	3	3	3	3	17.8778	17.6854	17.8145	17.7983	17.594	17.5427	19.0403	18.6739	19.0947	19.2765	19.2846	19.0328	18.7928	18.7478	18.8031	19.6104	19.3964	19.5399	18.4107	18.0624	18.2579	18.5244	18.746
Cd37	Q61470	Q61470	Leukocyte antigen CD37	0	0	0	NaN	0.961524	0.801355	NaN	NaN	-0.056605	-0.319487	NaN	NaN	NaN	NaN	NaN	0	1	1	2	2	3	1	0	NaN	NaN	NaN	NaN	NaN	15.5682	NaN	16.089	NaN	NaN	16.1922	15.8727	16.6211	16.326	NaN	16.503	16.5262	15.433	NaN	NaN	16.0636	NaN	NaN
Cd38	P56528	P56528	ADP-ribosyl cyclase/cyclic ADP-ribose hydrolase 1	0	0	0	0.984762	0.991845	1.22923	0.858853	-0.0221533	-0.0118133	0.297757	-0.219517	0.861691	0.922715	0.225889	0.548819	3	3	3	3	3	3	3	3	15.5957	15.4652	15.3637	15.6237	15.2822	15.4522	15.8635	15.6596	15.9734	15.7603	15.7445	15.9562	16.1427	16.2203	16.2202	16.1318	16.8473	16.4973	15.1742	15.2796	16.1299	15.2257	15.5912
Cd3eap	Q76KJ5	Q76KJ5	DNA-directed RNA polymerase I subunit RPA34	0	0	0	1.33221	1.63537	0.85099	0.895476	0.41382	0.709617	-0.232787	-0.159273	NaN	0.0362298	0.188436	0.729668	2	2	3	3	3	3	3	3	NaN	9.63166	10.3622	NaN	10.3622	10.4594	12.327	12.805	12.5816	13.5024	13.4214	12.9186	12.9714	12.651	12.7346	12.7739	12.419	12.4657	11.7738	10.8464	10.9894	10.4656	11.5648
Cd47	Q61735	Q61735	Leukocyte surface antigen CD47	0	0	0	0.962539	0.579318	0.829063	1.33417	-0.0550833	-0.787573	-0.270447	0.415947	0.115671	0.0100733	0.542407	0.0155307	3	3	3	3	3	3	3	3	18.7693	18.8002	18.7901	18.7445	18.6814	18.7684	19.8247	19.698	20.2081	19.2046	18.9696	19.194	20.109	19.2903	20.6302	19.8639	19.8452	19.509	18.5742	18.5234	18.7721	19.1049	18.9005
Cd48	P18181	P18181	CD48 antigen	1	0	0	0.810593	1.46618	2.25578	2.6654	-0.30295	0.55206	1.17362	1.41435	0.0622852	0.0049079	0.000318651	3.04263e-05	3	3	3	3	3	3	3	3	15.5222	15.6004	15.4969	15.0102	15.3307	15.3697	16.798	16.7598	17.0682	17.3992	17.4459	17.437	17.4905	17.7163	17.6124	18.8773	18.8361	18.6266	16.8928	16.7174	16.8698	18.2675	18.2911
Cd5	P13379	P13379	T-cell surface glycoprotein CD5	0	0	0	NaN	NaN	NaN	NaN	NaN	NaN	NaN	NaN	NaN	NaN	NaN	NaN	0	0	0	3	0	3	0	3	NaN	NaN	NaN	NaN	NaN	NaN	NaN	NaN	NaN	13.4137	14.8643	14.0357	NaN	NaN	NaN	15.8324	16.2854	17.3655	NaN	NaN	NaN	17.5014	17.0205
Cd63	P41731	P41731	CD63 antigen	0	1	0	1.03997	0.870436	3.62125	3.67556	0.0565467	-0.20019	1.85649	1.87796	0.702184	0.383082	0.00117227	0.036416	3	3	3	3	3	3	3	3	13.9797	14.0575	14.3806	14.0799	14.2146	14.293	17.0131	16.6075	16.4282	16.4439	16.6881	16.3163	16.2094	15.8269	15.991	18.0126	18.1059	17.4782	15.9685	15.756	14.4366	17.834	17.3967
Cd68	P31996	P31996	Macrosialin	1	0	0	0.950932	1.78102	1.91734	2.33477	-0.0725867	0.8327	0.939103	1.22328	0.470924	0.000931508	0.00645009	0.00782219	3	3	3	3	3	3	3	3	20.4054	20.3575	20.5816	20.4966	20.3229	20.3072	20.5724	20.6097	20.4918	21.5616	21.2664	21.3441	20.7486	20.9093	20.4467	21.8437	21.645	21.4332	20.2959	20.1164	19.8558	20.9407	21.6755
Cd72	P21855	P21855	B-cell differentiation antigen CD72	0	0	0	NaN	4.27546	NaN	NaN	NaN	2.09608	NaN	NaN	NaN	NaN	NaN	NaN	0	0	1	1	0	3	0	1	NaN	NaN	NaN	NaN	NaN	NaN	NaN	12.1746	NaN	14.2707	NaN	NaN	NaN	NaN	NaN	15.4207	15.4895	15.28	NaN	NaN	NaN	NaN	16.0452
Cd74	P04441	P04441	H-2 class II histocompatibility antigen gamma chain	1	0	0	0.951358	2.23099	4.8754	7.88767	-0.07194	1.15768	2.28552	2.9796	0.77441	0.00174349	0.0140498	0.00358958	3	3	3	3	3	3	3	3	15.2631	15.0911	14.6307	15.09	15.0326	14.6465	15.2487	14.7217	15.0375	16.2025	16.1704	16.108	15.624	14.8367	14.1391	17.3234	17.6392	16.4937	16.3606	15.5791	14.7281	18.3044	18.6973
Cd81	P35762	P35762	CD81 antigen	0	0	0	1.01582	0.85988	1.01071	1.36599	0.0226467	-0.217793	0.0153733	0.449947	0.925169	0.0861263	0.883369	0.00457042	3	3	3	3	3	3	3	3	18.6153	18.346	18.4078	18.852	18.1203	18.4647	19.429	19.5265	19.6314	19.2298	19.24	19.4637	19.526	19.3733	19.5239	19.4204	19.6577	19.3913	18.6377	18.3996	18.6291	19.0223	18.9969
Cd82	P40237	P40237	CD82 antigen	0	0	0	1.18342	0.495877	0.634697	0.705565	0.242967	-1.01195	-0.65586	-0.50315	0.129554	0.00116617	0.0186891	0.0057369	3	3	3	3	3	3	3	3	17.5831	17.2734	17.2549	17.7099	17.4766	17.6538	19.2046	19.4801	19.0888	18.2006	18.2142	18.3228	19.5149	19.1452	19.6802	18.8839	18.826	18.6628	18.7407	18.5071	18.6256	18.2349	18.0113
Cd84	Q18PI6	Q18PI6	SLAM family member 5	0	0	0	1.06092	1.10565	0.603777	0.733757	0.08532	0.144897	-0.727913	-0.446627	0.745218	0.0294735	0.446453	0.772904	3	3	3	3	3	3	3	3	17.7782	18.3354	18.5399	18.484	18.2012	18.2243	19.4129	19.5211	19.41	19.5674	19.6407	19.5706	21.7649	19.4795	18.9544	19.3773	19.3014	19.3364	18.4779	21.2934	18.3621	21.0954	17.9387
Cd86	P42082	P42082	T-lymphocyte activation antigen CD86	0	0	0	1.0781	1.35774	1.5394	1.66663	0.108495	0.441207	0.622367	0.736933	NaN	0.0147738	0.0654728	0.00556587	3	2	3	3	3	3	3	3	13.7965	14.4005	14.19	14.3011	14.1738	NaN	15.3256	15.3804	15.2263	15.6857	15.9439	15.6262	15.3931	15.6087	15.4923	15.8742	15.8884	16.5986	14.7845	14.7477	15.0491	15.4087	15.7296
Cd9	P40240	P40240	CD9 antigen	0	0	0	0.913238	1.16077	1.65474	1.13459	-0.130937	0.21508	0.726603	0.182177	0.222103	0.215155	0.0383583	0.318275	3	3	3	3	3	3	3	3	21.1319	21.0919	21.2986	21.1725	20.9688	20.9884	22.2039	22.4841	22.1757	22.3927	22.3972	22.7191	22.7929	22.6159	22.272	23.4666	23.4742	22.9198	21.7712	21.6368	21.913	22.0979	22.091
Cd99l2	Q8BIF0	Q8BIF0	CD99 antigen-like protein 2	0	0	0	0.982255	0.662372	0.924614	2.78058	-0.02583	-0.594287	-0.113077	1.47539	NaN	0.00672281	0.323491	NaN	2	3	3	3	3	3	3	1	NaN	12.8992	13.5544	12.7436	13.8092	13.0501	15.1039	15.2914	14.9291	14.61	14.4758	14.4557	15.3354	15.1436	15.4621	15.1467	15.1784	15.2767	14.6758	14.4691	14.6264	NaN	16.0658
Cdan1	Q8CC12	Q8CC12	Codanin-1	0	0	0	1.70637	0.748207	0.344403	0.547673	0.77093	-0.41849	-1.53783	-0.868613	0.250092	0.508032	0.192561	0.294699	3	3	3	3	3	3	3	3	15.2294	14.6596	13.463	15.5618	14.7559	15.3472	17.7001	17.775	16.1087	17.0272	16.3981	16.9029	17.0323	16.2652	15.771	14.9647	13.1718	16.3186	16.6504	16.5918	16.7803	16.5628	16.4852
Cdc16	Q8R349	Q8R349	Cell division cycle protein 16 homolog	0	0	0	1.10254	1.22636	1.20948	1.16292	0.140837	0.294383	0.274383	0.217757	0.171029	0.00774135	0.0206402	0.0307128	3	3	3	3	3	3	3	3	16.2458	16.2999	16.0812	16.4488	16.3338	16.2669	17.4455	17.3011	17.3069	17.5994	17.6205	17.7167	17.8188	17.7516	17.5936	18.046	18.0045	17.9367	17.0775	17.0448	17.1892	17.3222	17.4081
Cdc23	Q8BGZ4	Q8BGZ4	Cell division cycle protein 23 homolog	0	0	0	1.09466	1.23993	1.27239	1.38429	0.130487	0.310263	0.34754	0.46915	0.320225	0.0323764	0.0187492	0.00821839	3	3	3	3	3	3	3	3	14.9454	14.8837	14.6234	14.9256	15.0599	14.8584	16.062	16.0627	16.0005	16.4439	16.4486	16.1636	16.2851	16.3362	16.0618	16.5959	16.6214	16.5084	15.5276	15.6357	15.6873	16.2465	15.9624
Cdc26	Q99JP4	Q99JP4	Anaphase-promoting complex subunit CDC26	0	0	0	1.00159	1.14433	1.04464	1.61324	0.00229	0.194507	0.0630033	0.68996	0.972511	0.222078	0.522638	0.00193392	3	3	3	3	3	3	3	3	14.5044	14.43	14.5902	14.5932	14.4815	14.4568	15.6911	15.7054	15.3745	15.7378	15.9415	15.6752	15.6491	15.7457	15.9266	15.8047	15.9137	15.792	15.0984	15.2702	15.1958	16.0293	15.7506
Cdc37	Q61081	Q61081	Hsp90 co-chaperone Cdc37	0	0	0	0.948121	1.04068	1.15314	1.32922	-0.0768567	0.05752	0.20557	0.41058	0.0232792	0.0420349	0.0192218	0.00381023	3	3	3	3	3	3	3	3	19.7155	19.7465	19.7815	19.6876	19.6722	19.6531	20.7129	20.7377	20.7712	20.7861	20.8174	20.7908	20.9922	21.0044	20.9664	21.2919	21.1776	21.1103	20.6338	20.5121	20.5398	20.8856	20.9512
Cdc40	Q9DC48	Q9DC48	Pre-mRNA-processing factor 17	0	0	0	1.32286	1.30467	1.22579	1.374	0.403658	0.38368	0.293717	0.458383	NaN	0.00878005	0.186565	0.0143108	2	3	3	3	3	3	3	3	NaN	14.4417	11.9054	10.536	15.1156	15.08	14.4007	14.3575	14.4276	14.6921	14.9338	14.7109	14.5465	14.755	14.4467	15.1239	14.93	14.5755	14.3364	14.5896	14.3206	15.0099	14.8002
Cdc42	P60766	P60766	Cell division control protein 42 homolog	0	0	0	0.928656	0.942551	0.897481	0.796605	-0.106783	-0.0853567	-0.156047	-0.328063	0.0351081	0.0177984	0.238378	0.0718381	3	3	3	3	3	3	3	3	21.0204	21.0182	21.0994	20.9798	20.9295	20.9083	22.1897	22.2535	22.199	22.144	22.1304	22.1117	22.1089	22.1413	21.8489	21.8132	21.8122	22.0056	21.3456	21.293	20.9382	20.7837	20.9295
Cdc42bpa	Q3UU96	Q3UU96	Serine/threonine-protein kinase MRCK alpha	0	0	0	0.824661	0.570366	0.755873	1.09589	-0.278127	-0.81004	-0.403783	0.132097	0.640872	0.131363	0.442467	0.687588	3	3	3	3	3	3	3	3	13.327	13.3261	13.1824	12.2275	12.7091	14.0646	14.1822	13.9479	14.4433	14.084	13.3726	12.6867	13.6197	13.5715	14.4771	13.1528	14.2282	13.076	12.5236	12.1357	12.9063	13.0297	12.6252
Cdc42bpb	Q7TT50	Q7TT50	Serine/threonine-protein kinase MRCK beta	0	-1	0	1.17046	0.778517	0.703842	0.498905	0.22707	-0.3612	-0.506677	-1.00316	0.143488	0.0161808	0.00288019	0.000180502	3	3	3	3	3	3	3	3	16.2996	16.1357	15.894	16.4159	16.3214	16.2732	17.2397	17.2111	17.3681	16.7592	16.9803	16.9958	17.5543	17.6367	17.6453	17.0659	17.0048	17.2456	17.2785	17.168	17.3257	16.3252	16.1379
Cdc42ep4	Q9JM96	Q9JM96	Cdc42 effector protein 4	0	0	0	0.915641	0.747375	0.564397	0.290986	-0.127147	-0.420097	-0.825217	-1.78098	0.566013	0.0278484	0.0729918	0.00287838	3	3	3	3	3	3	3	3	14.9429	14.6707	14.8983	14.4099	14.6723	15.0482	16.2621	16.2599	16.1186	15.5643	15.8916	15.9245	16.6467	16.6936	16.2405	15.9582	16.0616	15.0854	15.9819	15.936	15.7609	14.6383	13.7907
Cdc42se1	Q8BHL7	Q8BHL7	CDC42 small effector protein 1	0	0	0	1.73498	0.843654	0.657245	18.2579	0.79492	-0.245277	-0.605497	4.19045	0.263901	0.87244	0.596683	NaN	3	3	3	3	3	3	3	1	14.391	13.722	13.5401	14.1794	14.0714	15.7872	11.5145	13.6019	16.4349	13.3114	13.7683	13.7357	15.8026	15.4025	15.5049	16.5591	12.9892	15.3452	14.3903	15.3209	12.8612	NaN	NaN
Cdc42se2	Q8BGH7	Q8BGH7	CDC42 small effector protein 2	0	0	0	0.943563	0.83983	0.769728	NaN	-0.08381	-0.25183	-0.37758	NaN	0.814674	0.468187	0.0751163	NaN	3	3	3	3	3	3	3	0	15.6293	15.2568	16.3905	15.7187	15.6846	15.622	15.8299	14.907	15.5618	15.2753	15.3883	14.8796	16.298	16.3342	15.8894	15.7661	15.6967	15.9261	16.4417	16.2937	16.3624	NaN	NaN
Cdc5l	Q6A068	Q6A068	Cell division cycle 5-like protein	0	0	0	0.993161	1.15391	1.06967	1.17998	-0.0099	0.206537	0.0971667	0.238767	0.941242	0.223585	0.458614	0.414778	3	3	3	3	3	3	3	3	16.048	16.3199	16.0377	15.9537	16.2017	16.2206	16.5255	16.7153	16.3176	16.7806	16.8402	16.5573	17.2638	17.1797	16.911	17.1232	17.3047	17.2181	16.0871	16.3344	16.3932	16.9824	16.3903
Cdc73	Q8JZM7	Q8JZM7	Parafibromin	0	0	0	1.03001	1.26792	1.18203	1.22703	0.0426533	0.34246	0.241267	0.295167	0.823813	0.0109038	0.0888042	0.00549106	3	3	3	3	3	3	3	3	15.039	15.0172	14.6787	15.1285	15.0489	14.6854	16.2091	16.2938	16.0626	16.4756	16.597	16.5204	16.3529	16.2966	16.2465	16.623	16.6623	16.3345	15.9592	16.0728	15.9906	16.2435	16.2802
Cdh13	Q9WTR5	Q9WTR5	Cadherin-13	0	0	0	0.772007	0.588252	0.853173	0.996939	-0.373315	-0.765493	-0.22909	-0.00442333	NaN	0.0517622	0.35614	0.979468	2	2	3	3	3	3	3	3	11.4476	10.4349	NaN	10.5129	10.623	NaN	14.3611	14.4908	15.0939	13.8664	13.6076	14.1753	14.2889	14.0115	14.7344	14.0985	14.2326	14.0163	13.2932	13.4829	13.6598	13.3557	13.3487
Cdh2	P15116	P15116	Cadherin-2	0	0	0	NaN	0.343515	0.768782	1.03795	NaN	-1.54155	-0.379353	0.0537333	NaN	0.0200844	0.618548	0.912393	0	0	3	3	3	3	3	3	NaN	NaN	NaN	NaN	NaN	NaN	15.3915	15.2995	15.4441	13.1564	13.7814	14.5726	14.8054	13.508	15.9011	14.5885	14.353	14.1349	14.2221	15.0301	14.6553	15.3836	14.0163
Cdipt	Q8VDP6	Q8VDP6	CDP-diacylglycerol--inositol 3-phosphatidyltransferase	0	0	0	0.950932	0.931792	0.926732	1.3433	-0.0725867	-0.10192	-0.109777	0.425787	0.304834	0.358825	0.34626	0.0578091	3	3	3	3	3	3	3	3	18.2469	18.3411	18.345	18.1382	18.26	18.317	19.3941	19.6525	19.6893	19.5232	19.414	19.4929	19.437	19.4545	19.7218	19.4563	19.4894	19.3383	18.6633	18.4739	18.848	18.8481	19.2243
Cdk1	P11440	P11440	Cyclin-dependent kinase 1	0	0	0	1.25273	0.867511	0.804576	0.787548	0.325073	-0.205047	-0.3137	-0.34456	0.210443	0.288277	0.0142636	0.232151	3	3	3	3	3	3	3	3	19.8955	20.4474	19.9209	20.5944	20.1773	20.4672	20.0796	20.5818	20.1865	19.9401	20.156	20.1366	20.4396	20.5922	20.5083	20.2192	20.0849	20.2949	20.0731	20.2164	20.0431	19.355	20.1828
Cdk11b	P24788	P24788	Cyclin-dependent kinase 11B	0	0	0	2.1708	1.21451	0.7932	0.909104	1.11823	0.28038	-0.334243	-0.137483	0.287399	0.0948403	0.0213563	0.591551	3	3	3	3	3	3	3	3	11.2742	13.1358	12.9645	13.9215	12.2431	14.5645	15.8965	15.9441	15.5533	16.1077	16.1233	16.004	16.0878	16.2223	16.3193	15.9948	15.7898	15.842	15.1373	15.1929	15.6703	15.3988	15.3194
Cdk13	Q69ZA1	Q69ZA1	Cyclin-dependent kinase 13	0	0	0	0.95478	1.30929	1.26913	0.529718	-0.06676	0.38879	0.343837	-0.916703	NaN	0.0677517	0.246697	0.00839396	3	2	3	3	3	3	3	3	11.9764	11.1575	11.7593	NaN	11.4564	11.6722	13.6198	14.106	13.9567	14.2695	14.3955	14.1839	14.6081	14.53	13.9714	14.9962	14.6846	14.4603	15.4802	15.2532	15.3516	14.184	14.3669
Cdk17	Q8K0D0	Q8K0D0	Cyclin-dependent kinase 17	0	0	0	1.16634	0.584888	1.41055	1.32651	0.221993	-0.773767	0.49626	0.40764	0.3405	0.110661	0.00330054	0.536842	3	3	3	3	3	3	3	3	13.8971	13.5506	13.8943	13.9257	13.7541	14.3281	15.8109	15.9426	14.7611	14.767	14.6111	14.8151	14.9484	14.9062	15.0066	15.3177	15.5719	15.4605	16.0527	14.2625	14.3799	15.5704	14.9745
Cdk19	Q8BWD8	Q8BWD8	Cyclin-dependent kinase 19	0	0	0	1.02644	0.910455	1.3583	1.85321	0.03765	-0.13534	0.441807	0.890023	0.703006	0.497627	0.0426895	0.0135195	3	3	3	3	3	3	3	3	14.2421	14.3148	14.3622	14.2415	14.5127	14.2779	15.1902	14.7244	15.2556	14.9134	14.8029	15.048	14.8578	15.1782	14.8658	15.5165	15.194	15.5167	14.5411	15.0923	14.5165	15.7721	15.4394
Cdk2	P97377	P97377	Cyclin-dependent kinase 2	0	0	0	0.760384	1.34889	1.54032	1.22414	-0.3952	0.431777	0.623233	0.29177	0.13076	0.340415	0.00235374	0.168113	3	3	3	3	3	3	3	3	14.4852	14.7211	14.7168	14.1827	13.9472	14.6076	14.7866	14.979	13.79	14.6734	14.9723	15.2053	15.2451	15.0537	15.0749	15.8791	15.7097	15.6547	14.0724	14.3282	14.2061	14.5044	14.2168
Cdk2ap1	O35207	O35207	Cyclin-dependent kinase 2-associated protein 1	0	0	0	0.907519	1.31396	1.30393	1.33663	-0.14	0.393927	0.382867	0.418605	0.514127	0.24472	0.21022	NaN	3	3	3	3	3	3	2	3	13.3652	13.4876	13.1211	13.0047	13.5111	13.0381	14.1265	13.9325	13.3601	14.4499	14.2883	13.8626	13.956	13.7436	13.7741	14.5431	14.356	13.7232	NaN	12.5376	12.5326	13.0293	13.3073
Cdk4	P30285	P30285	Cyclin-dependent kinase 4	0	0	0	0.971426	1.25206	1.17401	1.05392	-0.0418233	0.3243	0.231443	0.0757667	0.398101	0.0218117	0.0493001	0.648479	3	3	3	3	3	3	3	3	15.7119	15.7207	15.6969	15.7459	15.5947	15.6634	16.3341	16.3186	16.3703	16.6807	16.8087	16.5065	16.4511	16.347	16.1715	16.549	16.5828	16.5321	15.9554	15.7389	15.4912	15.7926	15.9408
Cdk5	P49615	P49615	Cyclin-dependent-like kinase 5	0	0	0	1.04277	0.815144	1.06845	1.51421	0.0604267	-0.294873	0.0955133	0.598567	0.480075	0.105016	0.635556	0.00187294	3	3	3	3	3	3	3	3	16.78	16.8039	16.7815	16.971	16.7057	16.87	18.147	17.997	18.4588	17.8349	17.9188	17.9644	18.0962	18.0146	18.6005	18.3945	18.3294	18.2738	17.4797	17.3584	17.506	17.9306	18.0423
Cdk5rap3	Q99LM2	Q99LM2	CDK5 regulatory subunit-associated protein 3	0	0	0	0.992466	1.01592	0.891055	0.812089	-0.01091	0.0227833	-0.166413	-0.30029	0.73577	0.805857	0.121798	0.0135616	3	3	3	3	3	3	3	3	17.4328	17.4865	17.5091	17.5007	17.4632	17.4318	18.1189	18.2646	17.981	18.1506	18.1905	18.0917	18.3812	18.416	18.1673	18.1682	18.2069	18.0901	17.8614	17.7583	17.7261	17.4289	17.5984
Cdk6	Q64261	Q64261	Cyclin-dependent kinase 6	1	0	0	0.916718	1.47731	1.57868	1.45842	-0.12545	0.562973	0.65872	0.544407	0.276036	0.00797632	0.0120579	0.006322	3	3	3	3	3	3	3	3	17.928	17.7341	17.932	17.8877	17.6853	17.6448	18.1062	17.8878	17.9511	18.3564	18.6248	18.6528	18.195	18.2838	17.8717	18.8861	18.831	18.6096	17.6461	17.6081	17.6406	18.2751	17.9698
Cdk7	Q03147	Q03147	Cyclin-dependent kinase 7	0	1	0	1.09824	1.25485	1.45565	1.9536	0.135193	0.32751	0.541667	0.966137	0.830084	0.0712715	0.000661619	0.01554	3	3	3	3	3	3	3	3	12.1426	12.353	11.8504	13.1737	12.3741	11.2038	12.8673	12.5365	12.5345	13.1028	12.9788	12.8392	12.7438	12.7454	12.8137	13.3702	13.2067	13.351	12.6731	12.8239	12.5165	13.2774	13.5929
Cdk9	Q99J95	Q99J95	Cyclin-dependent kinase 9	0	0	0	0.676357	1.15064	1.25168	1.32335	-0.564143	0.202437	0.323863	0.404197	0.127571	0.0127295	0.0139079	0.0470339	3	3	3	3	3	3	3	3	14.7749	13.9265	14.7949	13.9093	14.0629	13.8317	15.2336	15.1423	15.1941	15.4376	15.4251	15.3146	15.3445	15.5171	15.5201	15.804	15.6875	15.8619	15.0434	15.0841	15.0589	15.1858	15.645
Cdkal1	Q91WE6	Q91WE6	Threonylcarbamoyladenosine tRNA methylthiotransferase	0	0	0	1.05138	0.942207	1.12766	0.858351	0.0722867	-0.0858833	0.173327	-0.22036	0.520243	0.800172	0.217804	0.100146	3	3	3	3	3	3	3	3	13.357	13.3646	13.099	13.2937	13.4539	13.2899	14.4999	14.7517	15.5228	14.7716	14.995	14.7502	15.2763	15.5393	15.2096	15.422	15.4886	15.6346	14.8512	14.8023	14.6145	14.4203	14.5127
Cdkn1b	P46414	P46414	Cyclin-dependent kinase inhibitor 1B	0	0	0	1.07986	1.05484	0.872958	0.580618	0.11084	0.0770233	-0.196017	-0.78434	0.649373	0.32939	0.167613	0.0186604	3	3	3	3	3	3	3	3	16.4667	16.2665	15.8019	16.2676	16.4909	16.1091	16.8936	16.8216	16.6726	16.882	16.9097	16.8273	16.9763	17.0791	16.6912	16.7385	16.7051	16.7149	16.7861	16.7762	16.7387	16.1096	15.5826
Cdkn2aip	Q8BI72	Q8BI72	CDKN2A-interacting protein	0	0	0	1.02423	1.22867	0.974416	0.923894	0.03454	0.2971	-0.03739	-0.1142	0.59718	0.144783	0.778487	0.305298	3	3	3	3	3	3	3	3	16.5538	16.4742	16.36	16.4717	16.5402	16.4798	16.774	17.276	17.0595	17.4483	17.3638	17.1886	17.308	17.6131	17.2035	17.3025	17.3445	17.3654	16.9999	17.0755	16.8623	16.9941	16.7358
Cdkn2aipnl	Q9D211	Q9D211	CDKN2AIP N-terminal-like protein	0	0	0	1.41039	0.768186	1.56054	0.165535	0.496093	-0.380473	0.642043	-2.59479	0.803433	NaN	0.639132	0.0656329	3	3	2	3	3	3	3	3	14.0943	10.8722	14.4586	14.9735	15.2516	10.6884	12.6823	15.2708	NaN	13.4307	13.5216	13.836	15.8865	15.3046	12.6069	15.6934	16.2821	13.7485	15.2631	15.2663	12.3154	12.2143	11.1357
Cdkn2c	Q60772	Q60772	Cyclin-dependent kinase 4 inhibitor C	0	0	0	0.926629	1.30008	1.57311	1.87753	-0.109937	0.3786	0.653617	0.908833	0.679081	0.000262137	0.111519	0.00476552	3	3	3	3	3	3	3	3	16.0657	15.9613	16.5885	16.18	16.3067	15.799	14.8647	14.7821	14.8531	15.2233	15.1777	15.2347	15.0511	14.8732	14.2381	15.5523	15.6063	14.9646	14.1938	14.108	13.7276	15.026	14.7824
Cds1	P98191	P98191	Phosphatidate cytidylyltransferase 1	0	0	0	1.29962	0.486178	0.708613	0.839295	0.378093	-1.04044	-0.49693	-0.25275	0.204612	0.0178602	0.282831	0.134298	3	3	3	3	3	3	3	3	14.0095	14.2617	13.5839	14.0259	14.4594	14.5041	15.3034	14.9099	15.0988	14.4426	13.6106	14.1375	15.4163	15.1331	16.1776	15.4324	15.2123	14.5914	15.1695	14.9421	15.2418	14.9429	14.6662
Cds2	Q99L43	Q99L43	Phosphatidate cytidylyltransferase 2	0	0	0	1.07625	0.625447	0.908749	1.38001	0.10601	-0.67704	-0.138047	0.464677	0.0790991	0.0178402	0.556371	0.0152885	3	3	3	3	3	3	3	3	16.92	17.0415	16.986	17.1451	17.0537	17.0668	18.1849	18.1228	18.6452	17.7554	17.5833	17.583	18.3447	18.1527	18.8677	18.3621	18.3204	18.2684	17.8674	17.7717	18.1313	18.4623	18.3709
Cdv3	Q4VAA2	Q4VAA2	Protein CDV3	0	0	0	1.02718	1.11234	0.970045	0.704148	0.0386933	0.153597	-0.0438767	-0.50605	0.286055	0.171256	0.188541	0.0286672	3	3	3	3	3	3	3	3	17.1725	17.1539	17.1788	17.2478	17.2263	17.1473	18.5773	18.7801	18.6022	18.9352	18.7728	18.7123	18.9342	18.8544	18.8915	18.8477	18.8239	18.877	18.2989	18.0794	18.0617	17.816	17.3853
Cdyl	Q9WTK2	Q9WTK2	Chromodomain Y-like protein	0	0	0	0.843697	0.698696	1.15854	1.59872	-0.245203	-0.517263	0.21231	0.676917	0.362486	0.126925	0.627944	0.108967	3	3	3	3	3	3	3	3	15.5833	16.3416	16.2095	15.7153	15.8017	15.8819	18.3292	17.813	17.7852	17.7036	17.0562	17.6158	17.8857	17.3868	17.7166	17.9897	17.1715	18.4649	16.9439	17.4561	17.2754	18.3181	18.0517
Ceacam1	P31809	P31809	Carcinoembryonic antigen-related cell adhesion molecule 1	0	0	0	1.38288	0.97899	0.698987	1.11855	0.467677	-0.0306333	-0.516663	0.161623	0.0161254	0.822319	0.0370441	0.25039	3	3	3	3	3	3	3	3	15.6795	15.7452	15.8143	16.2166	16.0218	16.4036	16.1485	16.2889	16.1918	15.9441	16.2478	16.3455	16.1655	16.697	16.4219	15.9036	15.7976	16.0332	16.1048	15.9495	15.928	16.2451	15.9432
Cebpzos	Q8BTE5	Q8BTE5	Protein CEBPZOS	0	0	0	1.11496	0.908682	0.509612	0.165344	0.156997	-0.138153	-0.97253	-2.59646	0.08389	0.0317117	0.00761012	NaN	3	3	3	3	3	3	3	2	16.1723	16.0348	16.1244	16.3512	16.2887	16.1626	17.3995	17.3728	17.359	17.3186	17.216	17.1824	17.4009	17.3544	17.6163	16.8224	16.2186	16.4131	15.1383	16.5232	16.4577	NaN	13.1265
Cecr5	Q91WM2	Q91WM2	Cat eye syndrome critical region protein 5 homolog	0	0	0	0.989209	0.691089	0.823115	1.06091	-0.0156533	-0.533057	-0.280833	0.0853067	0.895342	0.0188054	0.273038	0.660307	3	3	3	3	3	3	3	3	14.8148	14.7933	15.1336	14.8606	14.9091	14.9252	16.8973	16.7548	17.1306	16.2214	16.4797	16.4825	17.02	16.8146	17.3911	16.9648	16.9082	16.5102	16.1436	16.227	16.5743	16.2736	16.2819
Celf1	P28659	P28659	CUGBP Elav-like family member 1	0	0	0	1.01375	1.22486	1.03277	1.11365	0.0196967	0.292617	0.0465233	0.155293	0.85413	0.0258147	0.378056	0.251531	3	3	3	3	3	3	3	3	16.2347	16.2452	16.0736	16.0539	16.3433	16.2154	16.4285	16.297	16.1424	16.5931	16.547	16.6056	16.6532	16.6622	16.6279	16.6214	16.6826	16.7789	15.9044	16.1288	16.2125	16.3782	16.16
Celf2	Q9Z0H4	Q9Z0H4	CUGBP Elav-like family member 2	0	0	0	1.00258	1.20318	0.977149	0.913236	0.00372	0.266847	-0.03335	-0.13094	0.943878	0.103462	0.841197	0.340701	3	3	3	3	3	3	3	3	18.8254	18.738	18.7147	18.7772	18.818	18.694	18.7362	18.6205	18.3261	18.871	18.8538	18.7586	19.0952	19.0495	18.6142	18.8838	18.9377	18.8373	18.3442	18.6071	18.3085	18.4392	18.237
Cend1	Q9JKC6	Q9JKC6	Cell cycle exit and neuronal differentiation protein 1	0	0	0	1.64814	0.292061	0.549628	1.238	0.72084	-1.77566	-0.863473	0.308013	0.037248	0.00731016	0.321391	0.208992	3	3	3	3	3	3	3	3	13.3389	13.2038	13.8286	13.9046	14.3483	14.2811	19.0806	19.0705	19.8577	17.7876	17.0857	17.8085	17.9926	16.9177	19.3472	17.76	17.1785	16.7285	16.2931	16.2757	16.6627	16.5373	16.5751
Cenpv	Q9CXS4	Q9CXS4	Centromere protein V	0	0	0	0.737239	1.36738	0.935116	0.995512	-0.439797	0.451417	-0.0967833	-0.00649	0.25617	0.190381	0.744487	0.956219	3	3	3	3	3	3	3	3	13.3098	12.8755	13.5043	12.4982	13.3405	12.5316	17.1117	16.4902	16.4127	16.9277	17.4872	16.9541	14.6788	14.4509	14.5624	15.0034	14.1578	14.2404	13.9162	14.271	13.9875	14.006	14.0599
Cep135	Q6P5D4	Q6P5D4	Centrosomal protein of 135 kDa	0	0	0	0.991838	0.789155	0.897435	1.10079	-0.0118233	-0.34162	-0.15612	0.138543	0.943474	0.360638	0.389725	0.370878	3	3	3	3	3	3	3	3	17.303	17.6903	17.2987	17.5913	17.361	17.3043	18.8709	19.8616	19.6489	18.8675	19.1456	19.3434	19.1143	19.1145	19.5804	19.1319	19.1824	19.0265	19.3332	19.3648	19.4764	19.3006	19.5368
Cep170	Q6A065	Q6A065	Centrosomal protein of 170 kDa	0	0	-1	1.05411	0.963914	0.966771	0.631227	0.07602	-0.0530233	-0.0487533	-0.66377	0.536613	0.721523	0.347934	0.0195556	3	3	3	3	3	3	3	3	17.2346	17.1134	17.0617	17.4057	17.1631	17.0691	18.6757	18.7936	18.798	18.4381	18.8518	18.8183	18.8246	18.6733	18.7454	18.6712	18.7098	18.7161	18.3639	18.3715	18.4058	18.0174	17.4097
Cep41	Q99NF3	Q99NF3	Centrosomal protein of 41 kDa	0	0	0	0.918754	NaN	0.623815	NaN	-0.12225	NaN	-0.68081	NaN	NaN	NaN	NaN	NaN	2	2	0	1	1	1	0	2	13.0128	12.2745	NaN	NaN	12.4465	12.5963	NaN	NaN	NaN	NaN	NaN	13.4444	NaN	14.3137	NaN	13.6329	NaN	NaN	NaN	NaN	NaN	NaN	12.5806
Cept1	Q8BGS7	Q8BGS7	Choline/ethanolaminephosphotransferase 1	0	0	0	1.2906	0.696435	0.793902	1.01342	0.368043	-0.52194	-0.332967	0.01923	0.284431	0.0403979	0.261436	0.831006	3	3	3	3	3	3	3	3	17.6007	17.7254	17.268	18.1187	18.2074	17.372	18.3012	17.8753	18.2296	17.8083	17.411	17.6209	18.8044	18.829	19.1035	18.4344	18.2626	19.0411	19.2467	19.1735	19.174	19.2377	19.346
Cerk	Q8K4Q7	Q8K4Q7	Ceramide kinase	0	0	0	0.871386	1.03896	0.883074	0.825101	-0.198617	0.0551467	-0.179393	-0.277357	0.414425	0.748503	0.619684	0.442525	3	3	3	3	3	3	3	3	13.9756	14.4064	13.7235	14.0144	13.7455	13.7498	15.1221	15.4396	15.633	15.3619	15.5662	15.4321	15.7614	15.5883	15.5479	15.0849	16.1064	15.168	14.8027	14.7224	14.8254	13.9022	14.6034
Cers2	Q924Z4	Q924Z4	Ceramide synthase 2	0	0	0	1.01388	1.0063	1.13206	0.932651	0.0198933	0.00906667	0.178947	-0.10059	0.873967	0.962384	0.228216	0.701873	3	3	3	3	3	3	3	3	16.1283	16.3861	16.4169	16.477	16.2741	16.2399	16.9844	17.259	17.113	16.8334	17.3935	17.1567	17.2839	17.5393	17.3317	17.3671	17.6556	17.6691	16.8043	16.5247	17.3102	16.8483	16.8759
Cers5	Q9D6K9	Q9D6K9	Ceramide synthase 5	0	0	0	0.571244	1.22186	1.00565	0.953781	-0.80782	0.289073	0.00812333	-0.06827	0.278528	0.156886	0.983904	0.799235	3	3	3	3	3	3	3	3	13.8256	14.2368	13.9612	12.2168	14.3833	13	14.0663	14.3344	13.8264	14.3341	14.5126	14.2475	14.0774	13.6918	13.9441	14.2741	14.2735	13.1902	14.2971	14.2943	13.6009	14.0955	14.0906
Cers6	Q8C172	Q8C172	Ceramide synthase 6	0	0	0	1.03328	1.41864	1.49026	2.34195	0.0472367	0.50451	0.575563	1.22771	0.820686	0.249645	0.0205943	0.0241783	3	3	3	3	3	3	3	3	13.5006	13.5868	13.9354	13.4671	13.9617	13.7357	13.8223	13.9338	14.8134	15.0501	14.3373	14.6956	14.2358	14.1114	14.6099	14.974	14.8604	14.8495	12.6914	12.6226	13.292	13.7897	14.645
Cetn2	Q9R1K9	Q9R1K9	Centrin-2	0	0	0	0.883133	0.813308	1.12576	1.06914	-0.179297	-0.298127	0.1709	0.09645	0.410403	0.0984695	0.15661	0.291741	3	3	3	3	3	3	3	3	15.0589	15.6	15.0496	14.9822	15.1984	14.99	16.7258	16.4295	16.3528	16.0461	16.2671	16.3006	16.6401	16.3952	16.4415	16.5395	16.7473	16.7029	15.3077	15.4916	15.4523	15.6075	15.4121
Cetn3	O35648	O35648	Centrin-3	0	0	0	1.10519	0.925465	0.78673	0.895853	0.14429	-0.11175	-0.34606	-0.158667	0.313188	0.727648	0.00828034	0.258839	3	3	3	3	3	3	3	3	14.4305	14.2877	14.0999	14.5706	14.3827	14.2976	14.5099	15.5209	15.1534	14.8644	15.0249	14.9597	15.4416	15.5382	15.6673	15.1701	15.1796	15.2592	14.8511	14.5947	14.9062	14.4924	14.7446
Cfap20	Q8BTU1	Q8BTU1	Cilia- and flagella-associated protein 20	0	0	0	1.22881	0.407764	0.469567	1.61617	0.297263	-1.29419	-1.0906	0.692583	0.652052	NaN	NaN	NaN	3	3	2	3	2	3	2	3	14.4675	15.6101	15.4738	15.9874	14.4943	15.9616	NaN	17.5155	17.445	16.4712	15.8611	16.2258	NaN	16.953	18.0586	16.2988	16.3711	16.5758	14.1571	NaN	16.1217	16.6756	15.4251
Cfap36	Q8C6E0	Q8C6E0	Cilia- and flagella-associated protein 36	0	0	0	1.08886	0.666224	0.71569	0.958741	0.12282	-0.58592	-0.482593	-0.0607867	0.175319	0.236614	0.228911	0.756401	3	3	3	3	3	3	3	3	14.6191	14.5593	14.3829	14.6156	14.6244	14.6898	16.1767	16.0453	15.3358	15.9105	15.0742	14.8153	15.4426	16.3054	15.3123	15.2651	15.4039	14.9436	15.1477	15.097	14.9099	15.3209	14.7709
Cfdp1	O88271	O88271	Craniofacial development protein 1	0	0	0	1.06612	1.13143	0.845846	1.03063	0.0923633	0.178153	-0.241533	0.04353	0.575416	0.0163241	0.0429136	0.599542	3	3	3	3	3	3	3	3	16.0124	16.0036	15.5901	15.9773	16.0558	15.8501	16.6712	16.7964	16.7453	16.9601	16.9171	16.87	17.0523	17.2219	17.1282	16.8977	17.0049	16.7752	16.7824	16.5699	16.7761	16.733	16.8141
Cfh	P06909	P06909	Complement factor H	0	0	0	0.831645	0.940581	0.611679	0.802231	-0.26596	-0.0883767	-0.709153	-0.31791	0.140848	0.743227	0.0600907	0.303762	3	3	3	3	3	3	3	3	15.9349	16.0371	16.0562	15.4783	15.955	15.7971	16.0937	16.0269	15.3557	15.8421	15.8079	15.5612	16.5886	16.5881	15.822	15.4761	15.5918	15.8034	15.883	15.7483	15.4422	14.9153	15.5032
Cfl1	P18760	P18760	Cofilin-1	0	0	-1	0.932251	1.05243	1.04435	0.688187	-0.10121	0.07373	0.06261	-0.539127	0.262237	0.113618	0.637036	0.00550744	3	3	3	3	3	3	3	3	26.1546	26.0587	26.1628	26.1643	25.9524	25.9559	26.1848	26.2503	26.1408	26.2335	26.2682	26.2955	26.3076	26.3672	25.9792	26.2979	26.3091	26.2349	26.1284	26.2089	26.0805	25.7793	25.4779
Cfl2	P45591	P45591	Cofilin-2	0	0	0	0.930856	0.716012	0.832006	0.724275	-0.10337	-0.481943	-0.265333	-0.46539	0.581351	0.0114835	0.134355	0.00950284	3	3	3	3	3	3	3	3	18.3351	18.2544	18.4916	18.4589	17.9459	18.3663	19.732	19.7482	20.001	19.4255	19.2154	19.3945	19.4862	19.268	19.733	19.2079	19.3171	19.1662	19.0158	19.0856	19.2316	18.7454	18.4948
Cggbp1	Q8BHG9	Q8BHG9	CGG triplet repeat-binding protein 1	0	0	0	0.150673	1.40299	0.954575	1.61429	-2.7305	0.4885	-0.06707	0.690903	0.0689618	0.583574	0.946135	0.0349727	3	3	3	3	3	3	3	3	17.1257	17.5291	17.5231	13.5927	13.5369	16.8568	14.9968	15.1069	15.5357	17.309	14.8917	14.9042	15.2146	17.4921	16.7184	16.1855	15.4091	17.6293	14.8471	15.4836	15.515	15.925	16.0397
Champ1	Q8K327	Q8K327	Chromosome alignment-maintaining phosphoprotein 1	0	0	0	0.641196	0.617049	0.917581	1.83062	-0.641163	-0.696543	-0.124093	0.87233	0.0314346	0.459409	0.552271	0.014642	3	3	3	3	3	3	3	3	16.9095	17.2516	17.5224	16.7216	16.6137	16.4248	20.1894	20.0653	20.0556	20.4545	20.0441	17.7221	20.1328	20.3043	20.2165	20.1968	20.3499	19.7345	20.3557	20.4199	20.5141	21.7151	21.0743
Chchd1	Q9CQA6	Q9CQA6	Coiled-coil-helix-coiled-coil-helix domain-containing protein 1	0	0	0	NaN	0.514587	0.607869	0.125168	NaN	-0.958513	-0.718167	-2.99806	NaN	NaN	NaN	NaN	0	1	3	2	3	2	3	1	NaN	NaN	NaN	9.36933	NaN	NaN	14.9556	14.599	15.085	14.1303	13.7124	NaN	14.298	15.1258	14.7224	14.4268	NaN	13.5677	14.2445	13.9211	13.4508	10.8741	NaN
Chchd2	Q9D1L0	Q9D1L0	Coiled-coil-helix-coiled-coil-helix domain-containing protein 2	0	0	0	1.09563	0.869451	0.886247	1.02835	0.131757	-0.201823	-0.17422	0.0403367	0.301149	0.19315	0.459335	0.726152	3	3	3	3	3	3	3	3	17.5249	17.1905	17.2249	17.4876	17.4665	17.3814	17.8164	17.437	17.44	17.4186	17.3248	17.3445	18.2369	18.1536	17.6318	17.8369	18.0003	17.6625	17.7729	18.0207	17.8797	17.7725	18.0237
Chchd3	Q9CRB9	Q9CRB9	MICOS complex subunit Mic19	0	0	0	1.1566	0.643209	0.796048	0.845731	0.209887	-0.63664	-0.329073	-0.24173	0.128035	0.0065822	0.153966	0.0291607	3	3	3	3	3	3	3	3	18.2698	18.1277	17.9038	18.2589	18.3324	18.3398	20.0449	20.1239	20.3904	19.6532	19.4315	19.5646	20.0294	19.83	20.3312	19.854	19.8507	19.4987	19.347	19.1265	19.1945	19.0069	19.0186
Chchd4	Q8VEA4	Q8VEA4	Mitochondrial intermembrane space import and assembly protein 40	0	0	0	1.04139	0.601668	1.08963	0.773352	0.0585067	-0.73296	0.12384	-0.370803	0.595507	0.0880968	0.663892	0.0833203	3	3	3	3	3	3	3	3	15.5945	15.5724	15.7322	15.5246	15.8257	15.7243	16.3735	16.1122	16.2247	16.0809	14.9856	15.445	16.6787	15.9694	16.1949	16.432	16.6703	16.1123	15.0998	15.2	14.9275	14.5216	14.9812
Chchd5	Q9CQP3	Q9CQP3	Coiled-coil-helix-coiled-coil-helix domain-containing protein 5	0	0	0	0.855018	1.15868	1.26642	1.11128	-0.225973	0.212485	0.34076	0.15222	0.596828	NaN	NaN	0.732743	3	3	1	2	2	3	3	3	14.6409	13.6447	13.9886	14.3922	13.5683	13.6358	14.7707	NaN	NaN	15.1403	14.8261	NaN	NaN	15.2317	14.912	15.3666	15.7605	15.1106	14.7888	14.7067	15.5176	15.4493	14.5055
Chchd6	Q91VN4	Q91VN4	MICOS complex subunit Mic25	0	0	0	1.34388	0.39088	0.692784	1.11409	0.426407	-1.3552	-0.529523	0.155867	0.0406495	0.00291175	0.347018	0.360243	3	3	3	3	3	3	3	3	14.2513	14.0033	13.984	14.2775	14.6204	14.6199	17.5197	17.5108	18.021	16.4834	16.0848	16.4176	17.2756	16.527	18.1572	17.022	16.8643	16.4849	16.2529	16.2791	16.6452	16.5403	16.4099
Chchd7	Q8K2Q5	Q8K2Q5	Coiled-coil-helix-coiled-coil-helix domain-containing protein 7	0	0	0	1.32872	0.425086	0.791803	2.37754	0.410033	-1.23417	-0.336787	1.24947	0.699359	0.012426	0.707893	NaN	3	3	3	3	3	3	3	2	10.7609	12.9178	11.7358	10.6873	12.8775	13.0798	14.9753	15.27	15.7061	14.1669	14.3638	13.7183	14.4066	12.5567	13.76	12.9651	14.4525	12.2953	14.6413	14.0262	11.3401	NaN	14.0202
Chd1	P40201	P40201	Chromodomain-helicase-DNA-binding protein 1	0	0	0	NaN	1.48215	1.01003	NaN	NaN	0.567687	0.0144033	NaN	NaN	NaN	0.983211	NaN	0	0	2	3	3	3	0	0	NaN	NaN	NaN	NaN	NaN	NaN	15.2958	14.8173	NaN	15.3279	16.6077	14.9373	15.4416	14.358	14.1398	14.7963	15.4545	13.7318	NaN	NaN	NaN	NaN	NaN
Chd2	E9PZM4	E9PZM4	Chromodomain-helicase-DNA-binding protein 2	0	0	0	0.757678	1.23055	0.876227	0.595661	-0.400343	0.2993	-0.190623	-0.747437	0.563269	0.224943	0.586805	0.337734	3	3	3	3	3	3	3	3	13.946	13.7622	12.5559	13.8672	12.9247	12.2713	15.4523	14.8775	14.8866	15.2774	15.5437	15.2931	13.9882	14.804	14.8924	14.325	14.1431	14.6447	15.3578	14.413	14.7313	14.5791	12.839
Chd4	Q6PDQ2	Q6PDQ2	Chromodomain-helicase-DNA-binding protein 4	0	0	0	1.0072	1.11444	1.14172	1.2827	0.01035	0.156317	0.19121	0.35918	0.954195	0.126163	0.101544	0.00160411	3	3	3	3	3	3	3	3	17.2714	17.2338	16.8266	17.1076	17.2859	16.9693	18.3689	18.5054	18.3128	18.5384	18.6577	18.4599	18.4144	18.6825	18.4799	18.7338	18.7768	18.6398	17.9078	17.9161	18.0232	18.3633	18.2975
Cherp	Q8CGZ0	Q8CGZ0	Calcium homeostasis endoplasmic reticulum protein	0	0	0	1.18976	1.29967	1.29445	1.1833	0.250667	0.37814	0.372337	0.242813	0.198503	0.40595	0.296322	0.0899978	3	3	3	3	3	3	3	3	16.0946	15.8515	15.5816	16.0798	16.2163	15.9837	17.1667	17.3917	16.0905	17.2193	17.1671	17.3969	17.5457	17.5504	16.6526	17.5473	17.7909	17.5275	17.2664	17.0687	16.9584	17.2405	17.329
Chga	P26339	P26339	Chromogranin-A	0	0	0	1.47097	1.40349	0.650802	1.79802	0.556763	0.48902	-0.61971	0.846407	0.373778	0.207426	0.0362204	0.142096	3	3	3	3	3	3	3	3	13.9121	12.6971	13.1897	14.5108	13.0306	13.9276	15.6054	15.4894	15.0753	15.3291	16.0385	16.2696	16.0745	15.6943	15.574	15.357	15.2146	14.9121	14.7443	14.0964	15.3449	15.0784	16.0891
Chgb	P16014	P16014	Secretogranin-1	0	0	0	0.302213	1.55005	1.03429	1.50498	-1.72636	0.632313	0.0486467	0.589747	NaN	0.0274014	0.924524	0.0150165	1	3	3	3	3	3	3	3	NaN	13.7317	NaN	11.4907	12.0457	12.4795	15.095	15.2402	15.7099	15.9882	15.95	16.0037	15.8564	17.3974	16.2829	16.7057	16.7104	16.2666	15.3179	14.837	14.9599	15.6197	15.6364
Chid1	Q922Q9	Q922Q9	Chitinase domain-containing protein 1	0	0	0	1.21896	0.735289	0.867222	1.12002	0.285653	-0.443617	-0.205527	0.163523	0.00220411	0.0136443	0.335893	0.454637	3	3	3	3	3	3	3	3	15.8865	15.8164	15.826	16.1962	16.0829	16.1068	17.3347	17.076	17.316	16.926	16.7551	16.7147	16.8493	17.0361	17.1566	17.0628	16.8647	16.4979	16.4954	16.3669	16.6541	16.3755	16.9944
Chil3	O35744	O35744	Chitinase-like protein 3	0	0	0	1.08271	1.40742	0.973311	0.301224	0.114643	0.493057	-0.0390267	-1.73109	0.482106	0.0678222	0.920285	0.00190863	3	3	3	3	3	3	3	3	16.9182	17.3028	17.4014	17.2944	17.343	17.329	17.6288	17.799	17.512	17.7866	18.2549	18.3774	17.7495	17.878	16.7663	17.3663	17.2817	17.6287	18.1279	17.6767	17.8891	16.5108	16.17
Chkb	O55229	O55229	Choline/ethanolamine kinase	0	0	0	0.771264	0.695962	1.09467	0.720155	-0.374703	-0.52292	0.1305	-0.47362	0.23322	0.188249	0.0809517	0.378913	3	3	3	3	3	3	3	3	16.7727	17.329	17.5215	17.1221	16.6803	16.6967	17.8667	18.027	18.0084	17.099	18.0963	17.138	17.0686	17.104	17.121	17.3336	17.1544	17.197	17.8833	17.5055	17.613	16.5337	16.9541
Chm	Q9QXG2	Q9QXG2	Rab proteins geranylgeranyltransferase component A 1	0	0	0	0.980716	1.01322	0.892372	1.20479	-0.0280933	0.0189533	-0.164283	0.26878	0.474133	0.796928	0.21241	0.154776	3	3	3	3	3	3	3	3	15.5592	15.5495	15.6378	15.5596	15.5134	15.5891	17.3932	17.5534	17.6099	17.5761	17.5413	17.4959	17.4343	17.5146	17.5107	17.4542	17.4038	17.1088	16.7105	16.5919	16.4409	16.5959	16.9135
Chmp1a	Q921W0	Q921W0	Charged multivesicular body protein 1a	0	0	0	0.91993	1.15414	0.799485	0.610894	-0.120403	0.206817	-0.322857	-0.711007	0.14501	0.189591	0.018264	0.0102694	3	3	3	3	3	3	3	3	17.8889	18.0917	18.08	17.8811	17.9186	17.8998	18.3169	18.4686	18.1252	18.3416	18.6176	18.572	18.6419	18.6195	18.3836	18.1991	18.2296	18.2476	17.94	18.0403	17.7782	16.9378	17.3294
Chmp1b2	Q9CQD4	Q9CQD4	Charged multivesicular body protein 1b-2	0	0	0	0.963476	0.987519	0.760372	0.778425	-0.05368	-0.01812	-0.395223	-0.36137	0.484105	0.788702	0.00835175	0.0409847	3	3	3	3	3	3	3	3	16.4037	16.4331	16.2951	16.4348	16.2653	16.2706	17.194	16.9815	17.1037	17.0711	17.1017	17.052	17.0878	17.3137	17.2633	16.7428	16.8429	16.8934	16.0836	16.098	16.1843	15.5596	15.7561
Chmp2a	Q9DB34	Q9DB34	Charged multivesicular body protein 2a	0	0	0	1.01696	0.966026	0.813595	0.724563	0.02426	-0.0498667	-0.297617	-0.464817	0.728611	0.278282	0.0071943	0.000904321	3	3	3	3	3	3	3	3	17.4844	17.5378	17.5791	17.6724	17.4747	17.5271	18.4812	18.3805	18.4186	18.3518	18.4306	18.3484	18.6322	18.7194	18.7857	18.3484	18.482	18.414	17.8742	17.8438	17.7039	17.3343	17.3479
Chmp2b	Q8BJF9	Q8BJF9	Charged multivesicular body protein 2b	0	0	0	0.974646	0.592359	0.674999	0.367149	-0.03705	-0.755457	-0.567043	-1.44556	0.434173	0.00241539	0.102451	0.00508181	3	3	3	3	3	3	3	3	15.8921	15.8546	15.7537	15.7987	15.8137	15.777	17.2411	17.3621	17.1384	16.3565	16.6621	16.4567	17.5574	17.5791	17.3756	17.0298	16.446	17.3352	17.1304	17.3201	16.9377	15.3979	15.5044
Chmp3	Q9CQ10	Q9CQ10	Charged multivesicular body protein 3	0	0	-1	0.945457	0.873296	0.711591	0.48232	-0.0809167	-0.195457	-0.49088	-1.05194	0.439791	0.0672095	0.00967121	0.000496975	3	3	3	3	3	3	3	3	18.6	18.5706	18.7648	18.7093	18.4931	18.4902	19.8091	19.7102	19.6822	19.4357	19.6676	19.5117	19.7565	19.9138	19.6127	19.293	19.1569	19.3605	19.0874	19.0719	18.9624	17.9077	18.1761
Chmp4b	Q9D8B3	Q9D8B3	Charged multivesicular body protein 4b	0	0	0	0.91907	1.11398	1.02325	0.967062	-0.121753	0.155723	0.0331567	-0.04832	0.0472153	0.137484	0.463611	0.78619	3	3	3	3	3	3	3	3	19.3395	19.4813	19.3915	19.2926	19.2951	19.2593	20.7025	20.9405	20.6828	20.9039	20.9368	20.9522	20.9788	20.9805	20.8811	21.0287	20.9525	20.9586	20.3417	20.1545	19.9612	19.8581	20.2676
Chmp5	Q9D7S9	Q9D7S9	Charged multivesicular body protein 5	0	0	0	0.962236	0.807237	0.673685	0.469638	-0.0555367	-0.308937	-0.569853	-1.09038	0.510799	0.0296739	0.0034205	0.000179062	3	3	3	3	3	3	3	3	16.7664	16.6084	16.6701	16.7324	16.6276	16.5183	17.8383	17.9159	17.9119	17.4063	17.6258	17.7072	18.0111	18.0214	17.995	17.4866	17.2627	17.5686	17.6653	17.7834	17.5204	16.5109	16.5787
Chmp6	P0C0A3	P0C0A3	Charged multivesicular body protein 6	0	0	-1	0.931919	0.879785	0.743898	0.667502	-0.101723	-0.184777	-0.426823	-0.583157	0.130129	0.0444269	0.00076165	0.0125653	3	3	3	3	3	3	3	3	16.654	16.7633	16.6544	16.5421	16.5577	16.6669	17.3563	17.4813	17.5543	17.316	17.2953	17.2263	17.5873	17.7289	17.6165	17.2329	17.1846	17.2347	16.62	16.7168	16.7385	16.3683	15.9582
Chmp7	Q8R1T1	Q8R1T1	Charged multivesicular body protein 7	0	0	0	0.838402	0.760992	0.895548	1.14544	-0.254287	-0.394047	-0.159157	0.195903	0.284978	0.17797	0.798117	0.379991	3	3	3	3	3	3	3	3	13.6227	14.1709	13.982	13.8678	13.7171	13.4279	13.7634	14.1835	14.5493	13.6137	13.8108	13.8896	14.1119	14.1746	15.095	13.9232	15.2694	13.7113	13.9897	13.7354	13.4359	13.8907	13.7262
Chn1	Q91V57	Q91V57	N-chimaerin	0	0	0	1.09295	0.933458	0.956131	0.704424	0.128233	-0.0993433	-0.06472	-0.505483	0.695317	0.736395	0.921875	0.576431	3	3	3	3	3	3	3	3	14.6137	14.4632	13.7626	14.1054	14.503	14.6158	13.7438	14.115	13.7735	13.8976	13.3012	14.1355	13.3751	14.1679	14.7553	13.0897	14.4498	14.5647	13.9908	14.158	14.6652	12.1651	14.7486
Chn2	Q80XD1	Q80XD1	Beta-chimaerin	0	0	0	0.918718	1.3878	1.58841	1.45936	-0.122307	0.4728	0.667587	0.545333	0.0987367	0.00236681	0.000750976	0.000327452	3	3	3	3	3	3	3	3	16.5578	16.7196	16.6363	16.4854	16.581	16.4803	17.7715	17.9124	17.7439	18.2375	18.3722	18.2364	17.9865	18.1576	18.0167	18.8163	18.6534	18.6938	17.7321	17.7059	17.7515	18.3307	18.1848
Chordc1	Q9D1P4	Q9D1P4	Cysteine and histidine-rich domain-containing protein 1	0	0	0	0.964857	0.956347	0.950457	1.00357	-0.0516133	-0.0643933	-0.0733067	0.00514333	0.466399	0.220457	0.0316419	0.956678	3	3	3	3	3	3	3	3	17.996	17.9187	18.0458	18.0311	17.8504	17.9241	18.4523	18.4327	18.3948	18.4019	18.4046	18.2801	18.6139	18.6505	18.5977	18.5793	18.5377	18.5252	18.1801	18.0353	17.9436	17.9485	18.0902
Chp1	P61022	P61022	Calcineurin B homologous protein 1	0	0	0	1.04167	0.999429	0.785807	0.846383	0.0589033	-0.000823333	-0.347753	-0.240617	0.210373	0.988871	0.0177785	0.104045	3	3	3	3	3	3	3	3	15.495	15.4922	15.6037	15.6004	15.5603	15.607	16.9463	16.9736	16.9942	16.9859	17.055	16.8708	16.5562	16.6374	16.7643	16.2318	16.2463	16.4366	15.961	15.5784	15.845	15.591	15.5317
Chst12	Q99LL3	Q99LL3	Carbohydrate sulfotransferase 12	0	1	0	0.921605	1.65986	2.73586	2.39692	-0.11778	0.731062	1.452	1.26118	0.377697	NaN	0.00974703	9.76241e-05	3	3	2	3	3	3	3	3	12.5576	12.5209	12.4083	12.3412	12.2082	12.584	12.2937	12.5555	NaN	13.0467	13.0979	13.3225	12.5309	11.8943	12.2558	13.9981	13.8596	13.1793	11.8716	11.9577	12.1405	13.222	13.2625
Chst2	Q80WV3	Q80WV3	Carbohydrate sulfotransferase 2	0	0	0	1.36293	1.26365	3.53155	6.8132	0.446709	0.3376	1.8203	2.76833	NaN	0.384527	0.0226768	NaN	1	2	3	3	3	3	1	3	NaN	9.94299	NaN	10.6067	NaN	10.1727	12.4682	11.9387	12.7146	12.8453	12.2102	13.0788	12.2909	11.9255	13.5625	14.5418	14.4697	14.2283	NaN	NaN	11.6966	14.7009	14.4792
Chst7	Q9EP78	Q9EP78	Carbohydrate sulfotransferase 7	0	0	0	1.00046	2.28518	0.684747	0.303993	0.00066	1.19231	-0.546357	-1.71789	0.997254	0.0330217	0.200178	NaN	3	3	3	3	3	3	3	2	13.8666	14.4203	13.8949	14.0434	14.0749	14.0655	11.3885	11.7862	10.5609	12.3741	12.3151	12.6233	13.4812	13.2413	12.6007	12.8814	12.7133	12.0894	12.2502	11.5848	11.8306	NaN	10.5986
Chtop	Q9CY57	Q9CY57	Chromatin target of PRMT1 protein	0	0	0	1.18546	1.14442	0.959847	0.795816	0.245447	0.194617	-0.0591233	-0.329493	0.314752	0.271456	0.615935	0.00924525	3	3	3	3	3	3	3	3	15.7356	15.7797	15.2149	15.7576	16.042	15.6669	18.1193	17.8502	17.6656	17.9812	18.2264	18.0115	17.975	18.0063	17.8048	18.0477	17.7794	17.7816	16.9697	17.143	16.9185	16.6502	16.6848
Chuk	Q60680	Q60680	Inhibitor of nuclear factor kappa-B kinase subunit alpha	0	0	0	1.24653	0.894864	0.807244	1.09555	0.31792	-0.16026	-0.308923	0.131653	0.036289	0.309084	0.0286453	0.478183	3	3	3	3	3	3	3	3	14.2142	14.187	14.4294	14.5268	14.5265	14.7312	15.6413	15.209	15.5794	15.3286	15.2645	15.3558	15.7827	16.0543	15.8099	15.5284	15.5552	15.6366	14.8137	15.1963	14.6701	15.0214	15.1323
Churc1	Q6DG52	Q6DG52	Protein Churchill	0	0	0	0.916335	1.25852	1.09258	0.830727	-0.126053	0.33173	0.127733	-0.267553	NaN	NaN	NaN	0.383366	2	3	2	2	3	1	3	3	14.9419	NaN	14.7192	14.7857	14.4372	14.8905	14.2011	14.605	NaN	NaN	14.9721	14.4975	14.8944	14.1319	14.212	14.5405	NaN	NaN	14.3455	15.1751	14.6309	14.2906	14.3623
Ciao1	Q99KN2	Q99KN2	Probable cytosolic iron-sulfur protein assembly protein CIAO1	0	0	0	0.930327	1.17242	0.981681	0.541555	-0.10419	0.229487	-0.0266733	-0.88482	0.262011	0.0755978	0.898293	0.00429872	3	3	3	3	3	3	3	3	16.6071	16.5275	16.7008	16.3839	16.5814	16.5574	16.2234	16.487	16.2803	16.6349	16.5878	16.4566	16.9143	16.9086	16.3416	16.599	16.7363	16.7491	16.4554	16.5299	16.2077	15.7452	15.391
Ciapin1	Q8WTY4	Q8WTY4	Anamorsin	0	0	0	0.909169	0.963019	1.17262	1.25953	-0.13738	-0.0543633	0.22973	0.33288	0.405421	0.638742	0.0856476	0.0399095	3	3	3	3	3	3	3	3	14.8814	15.254	14.9038	15.0303	14.7353	14.8615	15.6288	15.6387	15.6089	15.7794	15.5083	15.4257	15.7812	15.8199	16.0605	16.2186	16.0727	16.0594	15.4201	15.3135	15.5468	15.9157	15.6109
Cib1	Q9Z0F4	Q9Z0F4	Calcium and integrin-binding protein 1	0	0	0	0.787155	0.996414	0.970475	0.24088	-0.34528	-0.00518333	-0.0432367	-2.05362	0.268533	0.988358	0.874999	NaN	3	3	3	3	3	3	3	2	14.3549	15.171	14.8352	14.1869	14.5618	14.5766	14.2119	14.9489	14.3968	14.0299	14.8641	14.648	15.5377	14.8553	14.8051	14.8178	15.1011	15.1495	14.7784	15.1128	14.8511	12.9754	NaN
Cic	Q924A2	Q924A2	Protein capicua homolog	0	0	0	1.2319	1.22103	1.20265	1.43905	0.300885	0.288093	0.266213	0.525122	NaN	NaN	0.199209	NaN	1	2	2	3	3	3	2	3	NaN	NaN	13.3458	13.6865	13.6067	NaN	NaN	15.3461	15.1461	15.3458	15.6921	15.5647	15.8934	15.7914	15.8708	16.3598	16.2054	15.789	15.0189	NaN	15.5512	15.2539	16.1781
Cirbp	P60824	P60824	Cold-inducible RNA-binding protein	0	0	0	0.95684	1.25695	1.04865	0.786757	-0.06365	0.329927	0.0685367	-0.34601	0.49851	0.0166615	0.812957	0.0658108	3	3	3	3	3	3	3	3	17.389	17.2523	17.3623	17.2134	17.4191	17.1802	17.4427	17.4968	17.2672	17.8226	17.6708	17.7032	18.0829	18.2789	17.5174	18.1605	18.1885	17.7359	17.6738	17.8263	17.8384	17.6757	17.2458
Cisd1	Q91WS0	Q91WS0	CDGSH iron-sulfur domain-containing protein 1	0	0	0	1.25199	0.284556	0.644038	0.715007	0.324223	-1.81321	-0.634783	-0.48397	0.216537	0.0029232	0.227686	0.0210461	3	3	3	3	3	3	3	3	17.4438	17.5686	17.3871	18.2184	17.5465	17.6073	20.1612	19.8642	20.5097	18.6912	17.9768	18.4275	19.7913	19.0503	20.4199	19.4262	19.2017	18.7293	18.1751	18.2249	18.5307	17.9583	17.7212
Cisd2	Q9CQB5	Q9CQB5	CDGSH iron-sulfur domain-containing protein 2	0	0	0	0.918843	0.943373	0.998742	0.952493	-0.12211	-0.0841	-0.00181667	-0.07022	0.117809	0.403005	0.976	0.761892	3	3	3	3	3	3	3	3	18.6006	18.6346	18.7988	18.5601	18.5448	18.5629	19.1844	19.4631	19.2084	19.1938	19.1848	19.2251	19.3718	19.5265	19.4016	19.4566	19.4685	19.3693	18.935	18.7694	18.6255	18.3239	18.9802
Cisd3	B1AR13	B1AR13	CDGSH iron-sulfur domain-containing protein 3, mitochondrial	0	0	0	NaN	0.255693	0.431687	0.308622	NaN	-1.96752	-1.21194	-1.69609	NaN	NaN	0.116372	0.00579298	0	2	3	2	3	3	3	3	NaN	NaN	NaN	NaN	11.3858	12.2109	16.2825	15.6067	16.4841	14.4247	NaN	13.8891	15.3963	14.7255	16.6899	14.608	14.5517	14.0163	14.5752	14.3634	15.0602	13.4459	12.7712
Ckap4	Q8BMK4	Q8BMK4	Cytoskeleton-associated protein 4	0	0	0	1.03107	1.24732	1.00654	1.03384	0.0441433	0.318833	0.00941	0.0480067	0.505113	0.0588572	0.897893	0.797421	3	3	3	3	3	3	3	3	18.1784	18.1988	18.0234	18.1864	18.1324	18.2143	18.0368	18.2466	17.9812	18.5891	18.3184	18.3135	18.9933	19.0657	18.898	18.9988	19.0777	18.9088	18.7346	18.6868	18.4579	18.5021	18.979
Ckap5	A2AGT5	A2AGT5	Cytoskeleton-associated protein 5	0	0	0	0.982176	0.8919	0.861755	0.95316	-0.0259467	-0.165047	-0.21465	-0.06921	0.465003	0.0814688	0.0398872	0.164985	3	3	3	3	3	3	3	3	17.513	17.5971	17.5981	17.5161	17.5446	17.5696	18.9112	18.8278	19.0423	18.6943	18.7861	18.8059	19.1451	19.1233	19.2433	19.0665	18.9463	18.855	18.7592	18.7565	18.7433	18.7595	18.6706
Ckb	Q04447	Q04447	Creatine kinase B-type	0	0	-1	0.942201	0.7789	0.90233	0.565221	-0.0858933	-0.36049	-0.148273	-0.823113	0.543207	0.225841	0.587379	0.000963067	3	3	3	3	3	3	3	3	24.1702	23.9523	24.1991	24.1562	23.8182	24.0895	24.0815	23.792	24.6296	23.8337	23.889	23.6989	24.4969	23.8045	24.5639	24.0176	24.1572	24.2457	23.9127	23.8102	23.6613	22.9259	22.898
Ckm	P07310	P07310	Creatine kinase M-type	0	0	0	1.13191	1.08682	0.755278	0.0759868	0.178757	0.12011	-0.40492	-3.71811	0.143491	0.678875	0.485994	NaN	3	3	3	3	3	3	3	2	17.3102	17.1956	17.1275	17.5106	17.4275	17.2315	14.645	15.2282	14.7138	15.3402	14.6611	14.946	16.8078	16.7495	15.5749	15.4492	15.85	16.6182	17.2745	17.725	16.2991	14.0838	12.6791
Ckmt1	P30275	P30275	Creatine kinase U-type, mitochondrial	0	0	0	1.02477	0.481589	0.544795	0.7224	0.0352933	-1.05413	-0.876213	-0.46913	0.839517	0.00680907	0.0688667	0.161228	3	3	3	3	3	3	3	3	20.7791	20.5354	20.3951	20.8385	20.5267	20.4503	22.3075	22.2691	22.7202	21.108	21.4179	21.6085	22.0649	21.6985	22.7627	21.6043	21.2694	21.0238	19.9804	20.0031	20.7938	19.6771	19.8483
Clasp1	Q80TV8	Q80TV8	CLIP-associating protein 1	0	0	0	1.03134	0.883621	0.886197	1.03158	0.0445133	-0.1785	-0.1743	0.0448533	0.542353	0.104957	0.194352	0.416458	3	3	3	3	3	3	3	3	17.3502	17.4671	17.4448	17.5748	17.4345	17.3864	18.8331	18.6765	18.9651	18.6756	18.6118	18.6517	18.7209	18.9987	19.0262	18.7186	18.8453	18.659	18.4744	18.5248	18.5117	18.6413	18.5168
Clasp2	Q8BRT1	Q8BRT1	CLIP-associating protein 2	0	0	0	1.01653	0.937944	0.9013	0.759176	0.02365	-0.0924267	-0.14992	-0.397493	0.668015	0.208422	0.00754388	0.0225704	3	3	3	3	3	3	3	3	18.4206	18.4409	18.4035	18.4692	18.5175	18.3492	19.4776	19.3432	19.4882	19.3165	19.2919	19.4234	19.5638	19.6223	19.6003	19.4373	19.492	19.4075	19.2071	19.2947	19.0372	18.6227	18.8753
Clcc1	Q99LI2	Q99LI2	Chloride channel CLIC-like protein 1	0	0	0	0.901477	1.00764	1.01588	0.803702	-0.149637	0.0109767	0.0227367	-0.315267	0.170385	0.913757	0.839505	0.138129	3	3	3	3	3	3	3	3	16.4687	16.3918	16.6074	16.2165	16.4295	16.3729	18.1436	18.3417	18.0852	18.3027	18.1874	18.1133	18.3062	18.2761	17.9842	18.1967	18.2566	18.1814	17.4643	17.4255	17.156	16.7632	17.2338
Clcn3	P51791	P51791	H(+)/Cl(-) exchange transporter 3	0	0	0	1.18565	1.42675	1.16696	1.35138	0.245683	0.51273	0.22276	0.434433	0.348915	0.0464081	0.135215	0.00993302	3	3	3	3	3	3	3	3	16.2965	15.8105	15.7661	16.5185	16.054	16.0376	16.3373	16.4157	16.6686	16.7871	16.8933	17.2794	16.7377	16.4359	16.8268	16.8901	16.8629	16.9157	16.1422	16.1629	16.3573	16.5487	16.6451
Clcn4	Q61418	Q61418	H(+)/Cl(-) exchange transporter 4	0	0	0	1.02715	1.54886	1.29841	0.964166	0.03864	0.63121	0.376747	-0.0526467	0.912968	0.01162	0.00327772	0.892688	3	3	3	3	3	3	3	3	15.4032	15.2109	16.2435	15.8323	15.4908	15.6505	16.4474	16.5594	16.9198	17.2829	17.2458	17.2916	16.6229	16.5369	16.7195	16.9493	17.0139	17.0464	15.6404	15.569	15.3845	14.8533	16.0946
Clcn5	Q9WVD4	Q9WVD4	H(+)/Cl(-) exchange transporter 5	0	0	0	1.07549	1.22811	0.796692	0.776428	0.104993	0.296437	-0.327907	-0.365077	0.333014	0.024321	0.0194149	0.345413	3	3	3	3	3	3	3	3	15.3527	15.2367	15.1436	15.4936	15.3044	15.25	16.042	16.0971	15.875	16.3733	16.3277	16.2024	16.2768	16.5164	16.2648	16.0114	16.0793	15.9837	15.0526	14.9555	15.1126	14.1086	15.2795
Clcn6	O35454	O35454	Chloride transport protein 6	0	0	0	0.893133	3.52683	2.75713	2.91833	-0.163053	1.81837	1.46317	1.54514	0.814744	0.00101587	0.00385685	0.000597334	3	3	3	3	3	3	3	3	12.9513	14.946	13.0902	13.3711	13.4179	13.7093	14.7377	14.5463	15.204	16.6074	16.5291	16.8066	14.8788	14.8838	15.4402	16.2594	16.8021	16.5308	14.2736	14.4932	14.6671	16.1994	15.8267
Clcn7	O70496	O70496	H(+)/Cl(-) exchange transporter 7	0	0	0	1.01214	1.5208	1.43432	1.69117	0.0174133	0.604833	0.520363	0.75802	0.683979	0.00252359	0.0191409	0.000781447	3	3	3	3	3	3	3	3	15.9052	15.8502	15.777	15.8335	15.8718	15.8794	16.5621	16.5027	16.3428	17.1685	16.9591	17.0945	16.817	17.1109	16.7948	17.5327	17.5057	17.2453	16.5612	16.4218	16.3413	17.1139	17.2931
Cldn11	Q60771	Q60771	Claudin-11	0	0	0	1.05773	0.270766	0.413818	0.57232	0.0809733	-1.88488	-1.27293	-0.805107	0.791396	0.0146757	0.0573936	0.0803772	3	3	3	3	3	3	3	3	15.1503	15.6031	15.8735	15.298	15.604	15.968	16.8486	16.8107	17.7728	15.7652	14.6311	15.3812	15.9853	15.9448	17.1944	14.8371	15.6072	14.8614	15.6417	15.6928	16.1915	15.4809	14.4706
Cldn5	O54942	O54942	Claudin-5	0	0	0	0.958974	0.864865	0.476522	1.01184	-0.0604367	-0.209453	-1.06939	0.0169833	0.826082	0.487077	0.0127766	0.949286	3	3	3	3	3	3	3	3	15.7389	16.1684	15.8988	15.4415	15.9857	16.1975	16.7156	16.6633	17.3306	16.9744	16.3852	16.7214	17.0546	17.4203	17.5357	16.4169	16.5197	15.8659	16.2784	15.8432	16.7041	16.3352	16.3176
Cldnd1	Q9CQX5	Q9CQX5	Claudin domain-containing protein 1	0	0	0	1.09675	0.761657	0.804988	1.1571	0.13324	-0.392787	-0.31296	0.210517	0.74883	0.106941	0.426327	0.405006	3	3	3	3	3	3	3	3	12.6363	13.4884	13.4178	12.7642	13.6357	13.5423	16.1901	16.3153	16.7422	15.8451	16.0969	16.1272	16.2087	15.8109	16.771	16.2857	16.025	15.5411	15.5187	15.4241	15.9544	16.0542	15.5367
Clec10a	P49300	P49300	C-type lectin domain family 10 member A	0	0	0	0.97265	0.917952	0.487276	0.560385	-0.0400067	-0.12351	-1.03719	-0.83551	0.831452	0.260367	0.00271671	NaN	3	3	3	3	3	3	3	2	16.1019	16.1996	16.5827	16.4494	16.1489	16.166	16.9715	16.9735	17.0291	16.6867	16.9899	16.9269	16.5605	16.7177	16.865	15.4894	15.6154	15.9268	15.982	15.3549	15.3033	14.6419	NaN
Clec3b	P43025	P43025	Tetranectin	0	0	0	NaN	0.669632	1.52374	1.19458	NaN	-0.57856	0.607613	0.256503	NaN	0.291409	0.115221	NaN	0	0	3	3	3	3	2	3	NaN	NaN	NaN	NaN	NaN	NaN	17.4846	17.8635	17.1879	16.1247	17.0624	17.6131	16.5341	15.5507	15.8173	16.7226	16.4973	16.5051	14.8902	NaN	15.2529	14.6976	15.5684
Clec4a	Q9QZ15	Q9QZ15	C-type lectin domain family 4 member A	0	0	0	0.92889	0.679105	0.559459	0.196061	-0.10642	-0.558293	-0.837897	-2.35063	0.732468	0.0399339	0.0470286	NaN	3	3	3	3	3	3	3	2	15.3865	14.7436	15.1604	15.3902	14.6277	14.9532	16.0121	16.3547	16.1024	15.8924	15.5367	15.3651	16.0871	16.2311	16.0912	15.2646	14.8113	15.8197	15.8347	15.7239	15.6475	13.7855	NaN
Clec5a	Q9R007	Q9R007	C-type lectin domain family 5 member A	0	0	-1	0.855453	1.00904	0.788714	0.589681	-0.22524	0.0129833	-0.342427	-0.761993	0.143784	0.934845	0.129792	0.0423105	3	3	3	3	3	3	3	3	15.239	15.1995	15.0195	14.9276	15.1077	14.7469	16.1521	16.55	16.3639	16.2068	16.5362	16.3621	16.4693	16.6783	16.2724	15.9269	16.0757	16.3902	16.2103	16.1363	16.483	15.8676	15.0652
Clec7a	Q6QLQ4	Q6QLQ4	C-type lectin domain family 7 member A	1	0	0	0.976278	5.84711	11.3744	6.53676	-0.0346367	2.54772	3.50771	2.70858	0.866123	2.85041e-05	9.32021e-05	0.000568102	3	3	3	3	3	3	3	3	15.803	15.7037	15.8903	16.1326	15.6127	15.5478	15.3795	15.4221	15.5288	18.1949	17.8138	17.9648	15.4605	15.9285	15.6611	19.3948	19.3365	18.8419	16.4568	16.8704	15.9885	19.2907	19.1811
Clic1	Q9Z1Q5	Q9Z1Q5	Chloride intracellular channel protein 1	0	0	0	0.928834	1.17978	1.00268	0.897894	-0.106507	0.238513	0.00385667	-0.155383	0.213015	0.0948998	0.971292	0.265276	3	3	3	3	3	3	3	3	22.1002	22.0769	22.2122	22.1392	21.9501	21.9806	22.5896	22.8718	22.5612	22.8575	22.8757	23.0051	22.8684	22.9071	22.5922	22.8224	22.7954	22.7614	22.5578	22.4059	22.2545	22.0913	22.2957
Clic4	Q9QYB1	Q9QYB1	Chloride intracellular channel protein 4	0	0	0	1.12729	0.550473	0.787283	1.10313	0.172853	-0.861257	-0.345047	0.1416	0.440103	0.024122	0.294128	0.367734	3	3	3	3	3	3	3	3	16.2971	16.715	16.4292	16.3353	16.7849	16.8397	18.7196	18.266	18.9113	18.0566	17.544	17.7125	18.6746	18.3607	19.1331	18.6334	18.4633	18.0366	17.4375	17.1008	17.5615	17.4622	17.5279
Clic6	Q8BHB9	Q8BHB9	Chloride intracellular channel protein 6	0	0	0	0.795064	1.26709	1.08266	2.80875	-0.330857	0.34152	0.114583	1.48993	0.157932	0.20063	0.768493	0.588206	3	3	3	3	3	3	3	3	20.104	19.4601	19.6918	19.4564	19.4474	19.3594	20.2582	20.4268	20.1742	20.3257	20.5253	21.0327	20.939	20.6422	20.3981	21.4309	20.4591	20.4329	18.4661	13.3547	20.3506	16.0204	20.1318
Clint1	Q99KN9	Q99KN9	Clathrin interactor 1	0	0	0	0.952048	1.00829	1.12843	0.939568	-0.0708933	0.0119167	0.17432	-0.08993	0.371581	0.888265	0.110603	0.635994	3	3	3	3	3	3	3	3	18.0265	18.1895	18.2254	18.0811	18.1343	18.0133	19.3833	19.6307	19.4039	19.4804	19.4741	19.4993	19.7624	19.6681	19.5033	19.8944	19.8006	19.7618	18.8921	18.8261	18.3778	18.4701	18.6723
Clip1	Q922J3	Q922J3	CAP-Gly domain-containing linker protein 1	0	0	0	0.923299	1.14332	1.28801	1.24535	-0.11513	0.19323	0.36514	0.31655	0.145586	0.00435628	0.014591	0.0107579	3	3	3	3	3	3	3	3	17.5271	17.5566	17.4807	17.5209	17.3793	17.3188	18.4336	18.4077	18.5078	18.6181	18.6678	18.6429	18.7528	18.8323	18.583	19.1862	19.0467	19.0306	18.4898	18.5577	18.3549	18.8355	18.8047
Clip2	Q9Z0H8	Q9Z0H8	CAP-Gly domain-containing linker protein 2	0	0	0	1.11897	1.19321	1.19301	1.21275	0.16217	0.254843	0.25461	0.278283	0.387703	0.105332	0.0219386	0.171017	3	3	3	3	3	3	3	3	17.2792	17.1835	16.787	17.3399	17.2948	17.1015	18.53	18.538	18.4227	18.5206	18.8436	18.8911	18.7904	18.9123	18.7461	19.0847	19.1483	18.9796	18.4628	18.5315	18.5762	19.1278	18.6651
Cln3	Q61124	Q61124	Battenin	1	0	0	0.985704	1.65732	1.72043	1.97294	-0.0207733	0.72885	0.782767	0.98035	0.910497	0.00140446	0.00606262	0.00214604	3	3	3	3	3	3	3	3	15.1631	15.049	14.8226	15.2744	14.848	14.85	15.466	15.3961	15.3198	16.0399	16.0411	16.2875	16.0971	16.2512	16.0108	16.8224	17.1561	16.7288	15.844	15.9485	15.5483	16.9023	16.6849
Cln5	Q3UMW8	Q3UMW8	Ceroid-lipofuscinosis neuronal protein 5 homolog	0	0	0	0.855144	1.17553	1.16289	0.922184	-0.22576	0.23331	0.21771	-0.116873	0.158627	0.0166669	0.258853	0.534066	3	3	3	3	3	3	3	3	16.4293	16.3238	16.3506	16.3357	16.1867	15.9041	16.7352	16.5713	16.5841	16.8302	16.9157	16.8446	16.7418	16.9373	16.4659	16.9405	17.0904	16.7673	16.3058	16.6886	16.2025	16.4577	16.2011
Cln8	Q9QUK3	Q9QUK3	Protein CLN8	0	0	0	1.03668	1.06816	0.946786	1.24205	0.0519733	0.0951333	-0.07889	0.312727	0.845554	0.401219	0.234768	0.0446696	3	3	3	3	3	3	3	3	15.9547	15.187	15.9126	15.7248	15.7065	15.7789	16.4891	16.5488	16.6258	16.5536	16.8363	16.5591	16.8476	16.8858	16.7553	16.7364	16.6878	16.8278	16.2825	16.0531	16.2069	16.3357	16.5193
Clns1a	Q61189	Q61189	Methylosome subunit pICln	0	0	0	1.05159	1.01314	0.747896	0.82756	0.0725733	0.0188333	-0.41909	-0.273063	0.443407	0.856081	0.130657	0.00418076	3	3	3	3	3	3	3	3	17.3088	17.3306	17.2787	17.5153	17.2255	17.3951	17.7121	17.7001	17.4938	17.7412	17.5228	17.6984	17.984	17.91	17.5524	17.39	17.0945	17.7047	17.1505	17.2763	17.2983	16.9664	16.9803
Clpb	Q60649	Q60649	Caseinolytic peptidase B protein homolog	0	0	0	0.8083	0.750514	0.595157	1.33451	-0.307037	-0.41405	-0.748657	0.416307	0.534736	0.00701613	0.0417171	0.241663	3	3	3	3	3	3	3	3	14.6204	14.872	15.8017	14.3736	14.6888	15.3105	15.5841	15.4945	15.7688	15.2	15.2188	15.1864	16.1067	16.0507	16.4641	15.8787	15.1499	15.3469	15.4244	15.8795	15.3616	16.4749	15.6437
Clpp	O88696	O88696	ATP-dependent Clp protease proteolytic subunit, mitochondrial	0	0	0	1.04882	0.618985	0.996853	1.41602	0.0687667	-0.692023	-0.00454667	0.50184	0.190504	0.00565634	0.983079	0.00449296	3	3	3	3	3	3	3	3	16.8231	16.8292	16.7006	16.8779	16.8403	16.841	18.5132	18.5132	18.747	18.0965	17.8412	17.7597	18.2477	18.0172	18.6524	18.3015	18.4369	18.1653	17.5718	17.4386	17.5934	17.9104	18.0379
Clptm1	Q8VBZ3	Q8VBZ3	Cleft lip and palate transmembrane protein 1 homolog	0	0	0	1.24009	1.60756	1.24462	1.4279	0.310447	0.684873	0.31571	0.51389	0.2651	0.158956	0.689663	0.0284896	3	3	3	3	3	3	3	3	16.869	16.8081	16.9592	17.6552	17.018	16.8944	18.1289	18.1709	18.465	18.1827	19.405	19.2317	19.5582	19.6218	18.2651	20.0392	20.0635	18.2897	19.0894	19.0423	18.8294	19.2575	19.7054
Clptm1l	Q8BXA5	Q8BXA5	Cleft lip and palate transmembrane protein 1-like protein	0	0	0	1.01394	0.812825	1.29124	1.59902	0.0199767	-0.298983	0.368753	0.677187	0.898591	0.133606	0.011727	0.0113492	3	3	3	3	3	3	3	3	16.2464	15.9823	15.9041	16.2726	15.9761	15.944	16.6678	16.4125	16.6338	16.4699	16.3397	16.0076	16.9028	16.8381	16.8803	17.3092	17.3383	17.0799	16.6761	16.5269	16.3091	16.9641	17.2696
Clpx	Q9JHS4	Q9JHS4	ATP-dependent Clp protease ATP-binding subunit clpX-like, mitochondrial	0	0	0	1.11243	0.793581	0.896687	0.434238	0.15372	-0.33355	-0.157323	-1.20344	0.318231	0.0276571	0.189457	0.00226078	3	3	3	3	3	3	3	3	15.3786	15.0846	15.1238	15.5365	15.3095	15.2021	15.4181	15.7384	15.6248	15.2073	15.3122	15.2612	16.332	16.5484	16.2786	16.2063	16.1456	16.3351	16.0255	15.9968	15.9872	14.9805	14.9648
Clstn1	Q9EPL2	Q9EPL2	Calsyntenin-1	0	0	-1	1.03877	1.01524	0.7433	0.515467	0.05488	0.02182	-0.427983	-0.956047	0.65871	0.820341	0.0139289	0.00147215	3	3	3	3	3	3	3	3	17.8221	17.716	17.753	18.0363	17.6726	17.7468	18.7007	18.8472	18.7786	18.6508	18.8174	18.9238	18.9937	18.9882	18.6849	18.4458	18.4606	18.4765	18.3873	18.4069	18.0813	17.4612	17.2857
Clstn3	Q99JH7	Q99JH7	Calsyntenin-3	0	0	0	1.07364	0.997807	0.811909	0.501188	0.102517	-0.00316667	-0.30061	-0.996577	0.265042	0.989102	0.0838489	0.0798649	3	3	3	3	3	3	3	3	14.965	14.7128	14.7757	14.9617	14.9166	14.8828	15.585	15.6256	15.4977	15.1385	15.7497	15.8106	15.8571	15.8078	15.7431	15.2511	15.5932	15.662	14.9305	15.3013	15.1061	14.8871	13.4728
Clta	O08585	O08585	Clathrin light chain A	0	0	0	0.896163	1.02812	1.08357	1.24953	-0.158167	0.0400133	0.115797	0.32138	0.655481	0.0693818	0.440748	0.105208	3	3	3	3	3	3	3	3	21.6885	21.568	21.7052	21.9651	21.6525	20.8696	22.0999	22.1308	22.1352	22.1819	22.1409	22.1633	22.7104	22.5231	22.638	22.854	22.8731	22.4919	22.0394	22.0174	21.806	22.0301	22.495
Cltb	Q6IRU5	Q6IRU5	Clathrin light chain B	0	0	0	1.0248	0.654557	0.914979	1.08795	0.03534	-0.61141	-0.12819	0.121617	0.405288	0.0158973	0.587844	0.302621	3	3	3	3	3	3	3	3	19.1258	19.1308	19.0794	19.0804	19.1677	19.194	21.0384	20.8684	21.2332	20.6546	20.3169	20.3342	21.1111	20.7271	21.3733	21.0008	21.098	20.7283	20.0075	20.0964	20.3179	20.3	20.1717
Cltc	Q68FD5	Q68FD5	Clathrin heavy chain 1	0	0	0	1.00491	0.897044	0.990114	1.33662	0.00706	-0.15675	-0.0143333	0.41859	0.892536	0.0850984	0.845709	0.00648208	3	3	3	3	3	3	3	3	23.3974	23.328	23.4255	23.4674	23.3692	23.3355	24.1776	24.1474	24.3629	24.0837	24.0444	24.0896	24.6341	24.5702	24.7693	24.6921	24.6663	24.5723	23.8964	24.0889	24.0403	24.5192	24.3263
Clu	Q06890	Q06890	Clusterin	0	0	0	1.15326	0.967536	1.07284	1.87196	0.20572	-0.0476133	0.10144	0.90455	0.00570224	0.68129	0.635585	0.00111163	3	3	3	3	3	3	3	3	16.4542	16.4738	16.4864	16.7497	16.6286	16.6533	17.4798	17.5341	17.5333	17.3635	17.6806	17.3604	17.8343	17.825	17.8515	17.8243	18.3237	17.6671	17.0045	16.8782	16.9906	18.0592	17.7302
Cluh	Q5SW19	Q5SW19	Clustered mitochondria protein homolog	0	0	0	1.21425	0.997489	1.21627	1.33776	0.28007	-0.00362667	0.282467	0.419823	0.0508964	0.963821	0.253424	0.490316	3	3	3	3	3	3	3	3	14.3981	14.1936	14.3274	14.7502	14.506	14.5031	15.0999	15.0853	15.1901	15.1613	14.9896	15.2134	15.1457	15.1371	15.5614	15.7034	15.7417	15.2465	14.1985	15.8559	14.3018	15.0166	15.4726
Clvs1	Q9D4C9	Q9D4C9	Clavesin-1	0	0	0	NaN	0.344643	0.440061	4.3212	NaN	-1.53682	-1.18422	2.11143	NaN	NaN	NaN	NaN	0	1	3	1	2	3	1	3	NaN	NaN	NaN	11.2279	NaN	NaN	15.4773	15.5386	16.3985	14.268	NaN	NaN	14.8307	NaN	16.2947	14.5808	14.7191	13.8355	NaN	NaN	13.0385	15.2	15.2604
Clvs2	Q8BG92	Q8BG92	Clavesin-2	0	0	0	1.04523	0.855161	0.962475	1.20381	0.0638233	-0.225732	-0.0551783	0.26761	0.698104	NaN	NaN	NaN	3	3	2	3	3	2	2	2	14.8801	15.04	15.2546	14.9199	15.289	15.1573	15.6534	NaN	16.4043	15.6722	15.9204	15.8168	15.3735	16.0707	16.3881	16.0893	15.6887	NaN	14.7652	NaN	14.9418	NaN	15.0744
Clybl	Q8R4N0	Q8R4N0	Citrate lyase subunit beta-like protein, mitochondrial	0	0	0	0.925801	0.431626	0.857451	1.4746	-0.111227	-1.21215	-0.221873	0.560323	0.705064	0.00163794	0.459642	0.0520765	3	3	3	3	3	3	3	3	14.5795	15.1974	15.3042	14.6078	15.0833	15.0562	17.3936	17.0849	17.5858	16.2693	16.0453	16.1132	16.979	16.5716	17.4834	16.7629	16.9121	16.6934	15.7223	16.2076	16.4064	16.6786	16.6257
Cmas	Q99KK2	Q99KK2	N-acylneuraminate cytidylyltransferase	0	0	0	0.979572	1.19667	0.846618	1.13038	-0.0297767	0.25902	-0.240217	0.17681	0.778561	0.0012619	0.0325878	0.296498	3	3	3	3	3	3	3	3	18.4881	18.411	18.194	18.328	18.416	18.2597	19.1468	19.1461	19.1896	19.4584	19.437	19.3641	19.4658	19.6981	19.583	19.3764	19.2757	19.3741	19.4639	19.2969	19.1393	19.47	19.6772
Cmc1	Q9CPZ8	Q9CPZ8	COX assembly mitochondrial protein homolog	0	0	0	0.891609	0.730938	0.859782	1.25895	-0.165517	-0.45218	-0.217957	0.332227	0.203069	0.00680845	0.284761	0.390098	3	3	3	3	3	3	3	3	15.9518	15.975	15.7436	15.6022	15.8758	15.6959	17.6944	17.4576	17.5542	17.2037	17.0149	17.1309	17.3943	17.1051	17.5782	17.229	17.2733	16.9215	16.8934	17.0833	16.95	17.9873	16.9326
Cmc4	Q61908	Q61908	Cx9C motif-containing protein 4	0	0	0	NaN	0.449554	1.024	1.25774	NaN	-1.15343	0.0342117	0.33083	NaN	NaN	NaN	0.237046	1	0	3	1	3	2	3	3	NaN	14.4078	NaN	NaN	NaN	NaN	16.1028	15.5975	16.0849	NaN	NaN	14.775	15.5667	14.8699	15.5543	15.6604	15.0686	NaN	15.0387	15.208	15.4914	15.9241	15.5686
Cmklr1	P97468	P97468	Chemokine-like receptor 1	0	0	-1	0.997003	1.00463	0.688151	0.581436	-0.00433	0.00667	-0.539203	-0.782307	0.988154	0.991688	0.267208	0.00402474	3	3	3	3	3	3	3	3	16.0188	16.1636	16.7856	16.5573	16.0699	16.3278	17.8449	15.8606	17.3837	17.003	17.1391	16.9671	16.121	17.1888	16.9866	15.841	16.1144	16.7234	15.9961	16.031	16.0719	15.4972	15.1981
Cmpk1	Q9DBP5	Q9DBP5	UMP-CMP kinase	0	0	0	0.923167	1.03063	1.04739	1.10458	-0.115337	0.0435267	0.0668033	0.1435	0.28406	0.368542	0.303435	0.0307544	3	3	3	3	3	3	3	3	21.1793	21.076	21.1995	21.2059	20.9639	20.9391	21.552	21.5388	21.4389	21.5073	21.5655	21.5875	21.5181	21.6388	21.4713	21.589	21.6626	21.5769	21.2311	21.1984	21.2528	21.3902	21.2924
Cmpk2	Q3U5Q7	Q3U5Q7	UMP-CMP kinase 2, mitochondrial	0	0	0	0.943321	0.873496	1.8827	2.72731	-0.08418	-0.195127	0.912803	1.44748	0.508621	0.367875	0.0177902	0.000300173	3	3	3	3	3	3	3	3	16.5056	16.5049	16.2538	16.3923	16.179	16.4406	17.4041	17.0285	17.4244	17.3451	16.8503	17.0763	17.2498	16.8206	17.5914	18.1961	18.2189	17.9853	17.1259	17.0105	17.0153	18.2658	18.586
Cmtm3	Q99LJ5	Q99LJ5	CKLF-like MARVEL transmembrane domain-containing protein 3	0	0	0	0.944352	0.760294	0.819779	0.711215	-0.0826033	-0.39537	-0.286693	-0.491643	0.477738	0.178405	0.561886	0.235972	3	3	3	3	3	3	3	3	16.7958	16.5292	16.5955	16.6873	16.4534	16.532	18.2833	17.4601	17.8054	17.4226	17.4003	17.5398	18.6085	17.3973	17.1812	17.563	17.505	17.2588	17.7536	17.8191	17.6515	17.9329	17.0361
Cmtm4	Q8CJ61	Q8CJ61	CKLF-like MARVEL transmembrane domain-containing protein 4	0	0	0	0.947808	0.960806	0.719483	0.80689	-0.0773333	-0.0576833	-0.474967	-0.309557	0.72734	0.750963	0.0103689	0.52827	3	3	3	3	3	3	3	3	15.2115	15.6641	15.8763	15.5831	15.376	15.5608	17.2905	17.6903	17.7247	17.4693	17.6954	17.3679	17.1033	17.4358	17.35	16.882	16.7837	16.7985	15.3174	15.68	15.8626	16.0317	15.32
Cmtm5	Q9D6G9	Q9D6G9	CKLF-like MARVEL transmembrane domain-containing protein 5	0	0	0	1.45076	0.114855	0.810882	0.836722	0.53681	-3.12211	-0.302437	-0.25718	0.315776	0.00305459	0.706598	0.798076	3	3	3	3	3	3	3	3	11.4343	11.6533	10.8824	11.1896	11.7912	12.5997	16.6863	17.2319	17.6742	14.4094	13.2882	14.5284	16.404	15.0717	17.4879	16.1806	16.3778	15.4979	14.277	14.9769	16.4323	16.0416	13.6705
Cmtm6	Q9CZ69	Q9CZ69	CKLF-like MARVEL transmembrane domain-containing protein 6	0	0	0	0.911489	0.988039	0.611826	0.744366	-0.133703	-0.01736	-0.708807	-0.425917	0.0748166	0.961802	0.0300986	0.225778	3	3	3	3	3	3	3	3	18.9719	19.0211	18.8511	18.8029	18.7799	18.8602	17.795	18.8048	18.5858	18.0962	18.4378	18.5995	18.9641	19.0858	18.4183	18.1264	17.9964	18.219	18.2773	17.8957	17.31	17.4814	17.2078
Cmtm7	Q9ESD6	Q9ESD6	CKLF-like MARVEL transmembrane domain-containing protein 7	0	-1	0	0.927951	0.983698	0.538986	0.294598	-0.10788	-0.0237133	-0.89168	-1.76318	0.208805	0.908239	0.0138338	0.00269584	3	3	3	3	3	3	3	3	17.6307	17.5683	17.6039	17.3634	17.5132	17.6026	16.9993	17.5711	17.158	17.2218	17.3754	17.0601	17.8618	18.1795	17.5955	16.814	16.9064	17.2413	17.7694	17.2276	16.9141	15.688	15.5622
Cmtr1	Q9DBC3	Q9DBC3	Cap-specific mRNA (nucleoside-2'-O-)-methyltransferase 1	0	0	0	1.00524	1.268	1.37637	1.46008	0.00753667	0.342553	0.460863	0.54605	0.938636	0.00435108	0.000683836	0.0298143	3	3	3	3	3	3	3	3	15.9993	16.0813	15.8179	15.959	15.8971	16.065	17.0581	17.1129	17.0936	17.3377	17.4212	17.5333	17.3438	17.3713	17.2935	17.7743	17.737	17.8799	16.6772	16.702	16.5616	16.9062	17.2153
Cnbp	P53996	P53996	Cellular nucleic acid-binding protein	0	0	0	0.899977	0.991101	1.29371	1.19379	-0.15204	-0.0128967	0.37151	0.255553	0.291554	0.911874	0.0559975	0.378264	3	3	3	3	3	3	3	3	15.8337	15.4867	15.646	15.377	15.6366	15.4966	16.7543	16.9647	16.6876	16.9307	16.724	16.7132	17.7077	17.6054	17.3786	17.982	18.0802	17.7441	17.1613	17.4069	17.2	17.9859	17.1569
Cndp2	Q9D1A2	Q9D1A2	Cytosolic non-specific dipeptidase	0	0	0	0.916767	1.25675	1.18273	0.941903	-0.125373	0.329697	0.242127	-0.08635	0.256495	0.00368798	0.241544	0.504947	3	3	3	3	3	3	3	3	22.841	22.878	22.9257	22.939	22.6548	22.6748	23.3462	23.4022	23.2365	23.6279	23.7051	23.641	23.7441	23.9695	23.3752	23.9272	23.9997	23.8882	23.5151	23.5558	23.2348	23.454	23.3507
Cnep1r1	Q3UJ81	Q3UJ81	Nuclear envelope phosphatase-regulatory subunit 1	0	0	0	0.89039	1.04482	1.08275	0.818933	-0.16749	0.0632533	0.1147	-0.288183	0.37033	0.524071	0.291711	0.246157	3	3	3	3	3	3	3	3	13.4274	13.7458	13.6313	13.165	13.6184	13.5187	14.1816	14.2525	14.2985	14.4682	14.2702	14.1841	14.4551	14.6218	14.4069	14.5776	14.7406	14.5097	13.6499	13.2506	13.8414	13.4411	13.3847
Cnih4	Q9CX13	Q9CX13	Protein cornichon homolog 4	0	0	1	0.920279	1.31408	1.07291	2.18931	-0.119857	0.394053	0.10153	1.13048	0.177931	0.103348	0.640069	0.00510238	3	3	3	3	3	3	3	3	17.2315	17.0816	17.2048	17.037	16.9627	17.1586	17.0236	17.5162	17.3666	17.467	17.764	17.8576	17.3403	17.6139	17.4228	17.4915	17.908	17.2821	17.0902	16.8879	17.0257	17.772	18.4381
Cnksr2	Q80YA9	Q80YA9	Connector enhancer of kinase suppressor of ras 2	0	0	0	1.53297	0.956884	1.82123	0.449613	0.61633	-0.0635833	0.864917	-1.15324	NaN	0.925102	NaN	NaN	1	2	3	3	1	3	2	3	NaN	13.8709	NaN	14.8696	14.1049	NaN	13.5365	14.4113	12.944	12.8107	13.4582	14.4322	NaN	NaN	13.9733	14.7254	14.9899	14.7993	14.1874	14.835	NaN	14.4542	13.9018
Cnn2	Q08093	Q08093	Calponin-2	0	-1	0	0.952376	0.989348	0.627724	0.357028	-0.0703967	-0.01545	-0.671797	-1.48589	0.4565	0.849703	0.0227105	0.00649826	3	3	3	3	3	3	3	3	16.9492	16.8794	16.9225	16.8001	16.7319	17.008	17.1862	17.3906	17.1578	17.225	17.1943	17.269	17.6821	17.8347	17.6103	17.0963	16.7101	17.3053	17.3303	16.8746	16.991	16.042	15.1806
Cnn3	Q9DAW9	Q9DAW9	Calponin-3	0	0	0	4.05874	0.539841	0.708325	1.84984	2.02103	-0.889393	-0.497517	0.8874	NaN	0.0182166	0.0775818	0.0553486	2	3	3	3	3	3	3	3	12.2688	NaN	13.3523	15.6181	14.5107	14.3659	16.8069	16.7558	16.9894	16.1836	15.5223	16.178	16.5274	16.6818	17.2175	16.2972	16.2751	16.3619	15.9135	14.8935	15.6913	16.2501	16.2886
Cnnm3	Q32NY4	Q32NY4	Metal transporter CNNM3	0	0	0	1.20717	1.03105	1.10131	1.42798	0.271633	0.04411	0.139217	0.51398	0.360806	0.510366	0.182816	0.333663	3	3	3	3	3	3	3	3	13.7421	14.3017	13.8908	13.8431	14.4663	14.4401	15.4141	15.4571	15.4904	15.6111	15.453	15.4298	15.3894	15.5314	15.6222	15.6414	15.7522	15.5671	15.0417	14.9407	14.9588	15.1762	14.8933
Cnot1	Q6ZQ08	Q6ZQ08	CCR4-NOT transcription complex subunit 1	0	0	0	1.13121	1.2642	1.09423	1.31189	0.177863	0.33822	0.129917	0.391643	0.115955	0.00616694	0.0559244	2.50922e-05	3	3	3	3	3	3	3	3	17.2024	17.1114	16.9633	17.3512	17.2947	17.1649	18.2378	18.0951	18.1279	18.401	18.5141	18.5603	18.4907	18.5772	18.4903	18.7016	18.6738	18.5726	18.1075	18.0957	18.1461	18.4908	18.5223
Cnot10	Q8BH15	Q8BH15	CCR4-NOT transcription complex subunit 10	0	0	0	1.44594	1.1501	1.09027	1.12912	0.53201	0.201763	0.12469	0.175193	0.0223574	0.0320056	0.0408047	0.396027	3	3	3	3	3	3	3	3	14.6416	14.7469	14.2857	15.0002	15.1172	15.1529	16.3786	16.2659	16.3589	16.6212	16.442	16.5454	16.621	16.6957	16.5845	16.8019	16.7617	16.7116	16.385	15.8756	16.3864	16.3117	16.5336
Cnot11	Q9CWN7	Q9CWN7	CCR4-NOT transcription complex subunit 11	0	0	0	1.25874	1.97535	1.34037	1.45425	0.33198	0.982107	0.422627	0.54028	0.014758	0.00185811	0.0425264	0.114814	3	3	3	3	3	3	3	3	16.0969	16.0929	15.8885	16.3978	16.403	16.2734	18.3969	18.3479	18.1394	19.1134	19.4824	19.2346	18.8109	18.8776	18.5869	19.3475	19.2327	18.9631	17.6647	17.9909	17.4063	17.841	18.5584
Cnot2	Q8C5L3	Q8C5L3	CCR4-NOT transcription complex subunit 2	0	0	0	1.02806	1.26064	1.07419	1.0799	0.03993	0.334157	0.103253	0.1109	0.659323	0.0554136	0.360731	0.594348	3	3	3	3	3	3	3	3	15.9906	15.9769	15.905	16.0919	15.839	16.0614	15.7834	16.2063	15.9642	16.3627	16.3137	16.2798	16.5591	16.7843	16.4488	16.7184	16.7163	16.6672	16.1847	16.0362	15.8735	15.8126	16.3761
Cnot3	Q8K0V4	Q8K0V4	CCR4-NOT transcription complex subunit 3	0	0	0	0.954678	1.10966	1.08767	1.04093	-0.0669133	0.15012	0.121247	0.05787	0.417866	0.0509944	0.22031	0.644628	3	3	3	3	3	3	3	3	16.1197	16.0651	16.2651	16.1672	16.0186	16.0634	17.5708	17.6552	17.4944	17.6902	17.7801	17.7005	17.5717	17.583	17.3724	17.6919	17.6632	17.5357	16.9216	16.7471	16.6658	16.6685	16.9686
Cnot4	Q8BT14	Q8BT14	CCR4-NOT transcription complex subunit 4	0	0	0	1.26924	2.70101	1.2629	0.619885	0.343962	1.4335	0.336743	-0.689927	NaN	0.498642	0.0692813	0.0329372	3	2	3	3	3	3	3	3	13.8813	13.7292	13.7636	NaN	14.5777	13.6929	15.6041	15.378	9.71654	15.0996	15.1106	14.789	15.1807	15.3079	15.548	15.7998	15.7274	15.5195	16.1879	16.5057	16.2276	15.6803	15.2591
Cnot7	Q60809	Q60809	CCR4-NOT transcription complex subunit 7	0	0	0	1.20458	0.954522	1.13397	1.27664	0.268533	-0.06715	0.181377	0.35235	0.0629482	0.707692	0.101043	0.0774615	3	3	3	3	3	3	3	3	14.9371	14.58	14.7784	14.9957	15.0585	15.0469	16.3614	16.3284	16.5073	16.5508	16.4182	16.0265	16.6748	16.6814	16.849	17.03	16.9094	16.8098	16.4613	16.2192	16.3866	16.6048	16.5514
Cnot8	Q9D8X5	Q9D8X5	CCR4-NOT transcription complex subunit 8	0	0	0	NaN	1.10343	1.11944	1.26919	NaN	0.142	0.162773	0.34391	NaN	0.579377	0.175097	0.61167	0	3	3	3	3	3	3	3	NaN	NaN	NaN	14.5182	14.5568	14.8393	15.4672	15.0222	15.6597	15.4332	15.8021	15.3397	15.8525	16.0151	15.8758	16.2244	15.9304	16.0769	16.511	14.7194	15.3731	15.1962	16.2692
Cnp	P16330	P16330	2',3'-cyclic-nucleotide 3'-phosphodiesterase	0	0	0	1.2076	0.166995	0.329176	0.588328	0.272143	-2.58212	-1.60307	-0.765307	0.300857	0.00214532	0.0613232	0.1845	3	3	3	3	3	3	3	3	19.963	20.2377	19.7996	19.9441	20.2693	20.6033	24.3626	24.1778	24.8961	22.2634	21.3089	22.1177	24.0017	22.9687	24.8111	22.7896	22.4693	21.7134	22.7886	22.6632	23.7386	22.7864	21.6535
Cnpy2	Q9QXT0	Q9QXT0	Protein canopy homolog 2	0	0	1	0.932193	1.1979	1.4489	1.80663	-0.1013	0.260513	0.534953	0.8533	0.0380433	0.0191741	0.0208917	0.000577652	3	3	3	3	3	3	3	3	19.0959	19.1578	19.1847	19.0132	19.0385	19.0828	20.0585	20.2162	19.9999	20.3846	20.3071	20.3644	20.2781	20.1559	20.0268	20.8682	20.7497	20.4476	19.9541	20.0526	20.0018	20.7195	21.0002
Cnpy3	Q9DAU1	Q9DAU1	Protein canopy homolog 3	0	0	0	0.99648	1.01031	1.09957	1.24188	-0.00508667	0.0147967	0.136937	0.312523	0.926441	0.834019	0.089897	0.0320231	3	3	3	3	3	3	3	3	19.2379	19.1356	19.2748	19.2721	19.1746	19.1863	19.9334	20.1125	20.0758	20.0695	19.9848	20.1118	20.3385	20.3586	20.2244	20.534	20.4056	20.3927	19.7758	19.6808	19.7121	19.9291	20.2201
Cnpy4	Q8BQ47	Q8BQ47	Protein canopy homolog 4	0	0	0	1.04369	0.932333	1.06512	1.40619	0.0617	-0.101083	0.0910167	0.491787	0.603462	0.57657	0.34582	0.0172388	3	3	3	3	3	3	3	3	15.1429	15.1148	14.8164	15.1041	15.0224	15.1328	16.5517	16.7477	16.4487	16.7151	16.2263	16.5035	16.781	16.6923	16.8267	17.0082	16.7709	16.7938	16.5239	16.3918	16.3889	16.8236	17.1606
Cnr1	P47746	P47746	Cannabinoid receptor 1	0	0	0	NaN	0.487556	1.00957	1.0062	NaN	-1.03636	0.0137367	0.008915	NaN	0.0263763	0.992558	NaN	0	1	3	3	3	3	1	2	NaN	NaN	NaN	NaN	NaN	10.0198	15.3007	15.1997	15.9728	14.7937	14.1849	14.3855	14.2855	10.8588	15.3336	14.0938	13.0947	13.3306	NaN	NaN	13.2595	13.6619	12.875
Cnrip1	Q5M8N0	Q5M8N0	CB1 cannabinoid receptor-interacting protein 1	0	0	0	0.939108	0.97909	0.828188	1.31259	-0.0906367	-0.0304867	-0.27197	0.39242	0.43131	0.667218	0.172159	0.0242204	3	3	3	3	3	3	3	3	18.3437	18.3877	18.4072	18.4843	18.1407	18.2416	19.2403	19.1575	19.3562	19.2232	19.1647	19.2747	19.1434	19.0013	19.474	18.9417	19.0775	18.7836	18.5054	18.5943	18.6204	19.1716	18.9038
Cntn1	P12960	P12960	Contactin-1	0	0	0	0.900104	0.733601	0.691081	1.09324	-0.151837	-0.446933	-0.533073	0.128607	0.169601	0.077134	0.222553	0.600251	3	3	3	3	3	3	3	3	15.9091	15.9461	16.1449	15.7912	15.798	15.9554	17.6919	17.5856	18.141	17.3783	17.2088	17.4906	17.762	17.3549	18.4717	17.3542	17.6169	17.0182	17.1119	17.262	17.6291	17.7458	17.1702
Cntn2	Q61330	Q61330	Contactin-2	0	0	0	NaN	1.55993	NaN	NaN	NaN	0.64148	NaN	NaN	NaN	NaN	NaN	NaN	0	1	3	1	2	0	1	0	NaN	NaN	NaN	NaN	NaN	9.6332	13.3422	14.5678	14.6913	NaN	NaN	14.8419	13.7488	NaN	15.0793	NaN	NaN	NaN	NaN	NaN	13.278	NaN	NaN
Cntnap1	O54991	O54991	Contactin-associated protein 1	1	0	0	1.05618	1.88724	3.45019	5.81036	0.0788567	0.91628	1.78668	2.53863	0.594949	0.0200675	0.0264526	0.00126194	3	3	3	3	3	3	3	3	14.3925	14.1783	13.9464	14.342	14.195	14.2167	16.7237	16.6119	17.3514	17.8291	17.6597	17.9472	16.9779	16.3608	17.7789	19.0765	19.2102	18.191	16.1515	16.3447	17.1277	19.1591	18.8899
Coa3	Q9D2R6	Q9D2R6	Cytochrome c oxidase assembly factor 3 homolog, mitochondrial	0	0	0	0.970726	0.680792	0.900853	1.08577	-0.0428633	-0.554713	-0.150637	0.118713	0.660479	0.00404839	0.452077	0.231225	3	3	3	3	3	3	3	3	16.9268	17.1482	17.19	16.9705	17.1021	17.0637	18.6413	18.5659	18.8681	18.1536	18.0929	18.1646	18.6831	18.4684	19.0227	18.7081	18.5889	18.4253	17.9577	17.8679	17.8228	17.8532	18.0701
COA4	Q8BT51	Q8BT51	Cytochrome c oxidase assembly factor 4 homolog, mitochondrial	0	0	0	0.802304	0.54897	0.571409	0.797428	-0.31778	-0.8652	-0.807403	-0.326573	0.0656944	0.329006	NaN	0.443967	3	3	3	3	2	3	3	3	15.7059	15.5203	15.7913	15.4951	15.4025	15.1666	15.7687	16.4704	16.2725	16.1196	15.9903	13.8062	16.8294	16.6731	NaN	16.048	15.7607	16.0228	15.2915	15.7553	15.376	15.824	14.6086
Coa6	Q8BGD8	Q8BGD8	Cytochrome c oxidase assembly factor 6 homolog	0	0	0	0.850331	0.693796	0.729246	0.876551	-0.233903	-0.527417	-0.455523	-0.19009	0.204633	0.0179325	0.294356	0.177911	3	3	3	3	3	3	3	3	14.951	14.6406	14.7497	14.2977	14.6513	14.6906	16.825	16.5233	16.5541	16.3	16.0072	16.013	16.2092	15.5948	16.366	15.9024	15.8909	15.0101	15.6787	15.8675	15.5973	15.6922	15.4218
Coasy	Q9DBL7	Q9DBL7	Bifunctional coenzyme A synthase	0	0	0	0.950661	1.10442	1.08698	1.12299	-0.0729967	0.14329	0.120323	0.16735	0.252813	0.0898423	0.0364861	0.0490414	3	3	3	3	3	3	3	3	18.0935	18.0898	18.1506	18.138	18.0073	17.9697	18.6092	18.6634	18.6147	18.6503	18.8149	18.852	18.8823	18.9279	18.904	19.0882	19.0256	18.9614	18.476	18.5108	18.4053	18.7327	18.5681
Cog1	Q9Z160	Q9Z160	Conserved oligomeric Golgi complex subunit 1	0	0	0	1.00819	1.16154	1.09857	1.12878	0.01177	0.21604	0.135627	0.17477	0.991675	0.265133	0.893951	0.620903	3	3	3	3	3	3	3	3	13.7974	16.6741	13.7468	15.4062	13.9305	14.9168	17.5815	17.3552	17.0833	17.4298	17.5224	17.7159	17.5278	17.6395	14.8104	16.4935	16.6258	17.2653	15.9239	16.0785	15.8863	15.5349	16.2466
Cog2	Q921L5	Q921L5	Conserved oligomeric Golgi complex subunit 2	1	0	0	1.40836	1.50004	1.69216	1.70292	0.49402	0.585003	0.758863	0.768013	0.0266504	1.39714e-05	0.00597288	0.0031772	3	3	3	3	3	3	3	3	14.5944	14.2549	14.1468	14.9271	14.7895	14.7616	15.1987	15.1691	15.2286	15.7998	15.7535	15.798	15.8051	15.9637	15.491	16.5492	16.5375	16.4496	15.7786	15.6244	15.3643	16.3729	16.3429
Cog3	Q8CI04	Q8CI04	Conserved oligomeric Golgi complex subunit 3	0	0	0	0.83682	1.00918	1.2135	1.22783	-0.25701	0.01319	0.27917	0.29611	0.34371	0.933809	0.0523591	0.00267841	3	3	3	3	3	3	3	3	14.6395	14.8381	14.5857	14.7198	14.5892	13.9833	15.8007	15.975	15.9142	16.152	15.6664	15.9111	16.1124	15.9607	15.9539	16.3587	16.3928	16.113	15.3974	15.5036	15.4182	15.7134	15.6978
Cog4	Q8R1U1	Q8R1U1	Conserved oligomeric Golgi complex subunit 4	0	0	0	1.07721	1.42513	1.26104	2.85286	0.1073	0.511097	0.33461	1.51241	0.795946	0.0250054	0.183835	0.00291135	3	3	3	3	3	3	3	3	13.618	13.1824	12.3668	13.3084	12.9091	13.2716	13.2259	13.7021	13.4776	13.9139	13.9481	14.0769	14.3469	14.215	13.9061	14.8052	14.4045	14.2623	13.0852	12.9185	13.6821	14.7732	14.6921
Cog5	Q8C0L8	Q8C0L8	Conserved oligomeric Golgi complex subunit 5	1	0	0	1.27419	1.61891	1.62343	1.74295	0.349577	0.695027	0.699047	0.801533	0.204641	0.0228166	0.00744355	0.00471135	3	3	3	3	3	3	3	3	14.029	14.6588	14.6654	14.6132	14.8899	14.8988	15.0322	15.2276	14.6364	15.5735	15.579	15.8287	15.6511	15.4732	15.3875	16.3387	16.298	15.9723	15.5279	15.1442	15.1546	16.0983	16.1733
Cog6	Q8R3I3	Q8R3I3	Conserved oligomeric Golgi complex subunit 6	0	0	0	0.874872	1.15814	1.45717	1.64667	-0.192857	0.211813	0.543173	0.719553	0.690476	0.584538	0.0115042	0.000728998	3	3	3	3	3	3	3	3	14.29	13.7949	14.0883	13.0128	14.249	14.3328	15.0434	15.1369	15.0673	15.7206	14.5883	15.5742	15.1987	15.4262	15.593	15.8627	15.9696	16.015	15.2325	15.0863	15.2396	15.8235	16.0191
Cog7	Q3UM29	Q3UM29	Conserved oligomeric Golgi complex subunit 7	0	1	0	1.01637	1.33214	1.45508	1.45497	0.0234267	0.413747	0.5411	0.54099	0.922794	0.0289252	0.0191724	0.00833844	3	3	3	3	3	3	3	3	14.6078	15.2933	14.834	14.7295	15.0063	15.0695	16.3715	16.212	15.9712	16.6842	16.5511	16.5605	16.4823	16.6992	16.5178	17.2071	17.2577	16.8577	16.5105	16.4596	16.1986	16.8207	17.0017
Cog8	Q9JJA2	Q9JJA2	Conserved oligomeric Golgi complex subunit 8	0	0	1	0.9747	1.15175	0.671002	1.82937	-0.03697	0.203833	-0.57561	0.87135	0.945578	0.815281	0.36083	0.000536067	3	3	3	3	3	3	3	3	13.8907	13.7044	15.2555	14.5196	14.0477	14.1723	16.3986	14.2514	13.8898	15.3253	15.2398	14.5862	16.7552	16.8747	15.153	15.5649	15.7574	15.7338	14.8261	14.7152	14.7079	15.4683	15.6788
Col4a1	P02463	P02463	Collagen alpha-1(IV) chain	0	0	0	0.909518	1.30991	1.07586	1.34869	-0.136827	0.38947	0.105497	0.43156	0.550904	0.0530642	0.307824	0.362405	3	3	3	3	3	3	3	3	13.4589	13.4413	14.0077	13.6885	13.4511	13.3578	14.3282	14.2608	14.4605	14.9514	14.7656	14.5009	14.2328	14.3126	14.4424	14.5679	14.3685	14.3679	13.1569	12.537	12.1862	12.5361	13.6083
Col4a3bp	Q9EQG9	Q9EQG9	Collagen type IV alpha-3-binding protein	0	0	0	1.03975	0.96489	1.17282	1.42401	0.05623	-0.0515633	0.229987	0.509963	0.526713	0.414987	0.0133431	0.00161654	3	3	3	3	3	3	3	3	14.9341	15.1176	15.1406	15.2165	15.079	15.0655	16.275	16.1204	16.1794	16.2029	16.0839	16.1333	16.2347	16.3716	16.4067	16.563	16.5458	16.5942	15.8427	15.8985	15.7815	16.2455	16.4459
Colgalt1	Q8K297	Q8K297	Procollagen galactosyltransferase 1	1	0	0	0.953801	1.53583	1.62204	1.5153	-0.06824	0.61902	0.697807	0.5996	0.0188406	0.00467435	0.00190312	0.00499861	3	3	3	3	3	3	3	3	16.6361	16.6312	16.6155	16.5264	16.5708	16.581	16.5227	16.272	16.3569	17.1051	17.0579	16.8457	16.9042	17.1296	16.8286	17.7164	17.6167	17.6227	16.6295	16.6684	16.4054	17.2037	17.2643
Commd1	Q8K4M5	Q8K4M5	COMM domain-containing protein 1	0	0	-1	0.924527	1.05375	0.893003	0.684841	-0.113213	0.0755367	-0.163263	-0.54616	0.130746	0.314637	0.419747	0.00251508	3	3	3	3	3	3	3	3	18.0319	17.9792	17.8777	17.9253	17.8281	17.7957	18.9723	19.1683	18.972	19.1009	19.1247	19.1136	19.4519	19.5625	18.982	19.1642	19.1076	19.2347	18.8135	18.6915	18.6492	18.284	18.1703
Commd10	Q8JZY2	Q8JZY2	COMM domain-containing protein 10	0	0	-1	0.975204	1.01117	0.860726	0.70255	-0.0362233	0.0160233	-0.216373	-0.509327	0.720891	0.816173	0.00156648	0.0107718	3	3	3	3	3	3	3	3	19.2758	19.1599	19.2951	19.374	19.0996	19.1485	19.9623	20.1567	20.0216	20.0114	20.0644	20.1128	20.2695	20.2106	20.2086	20.0406	19.9742	20.0247	19.6349	19.631	19.6326	19.3401	19.0712
Commd2	Q8BXC6	Q8BXC6	COMM domain-containing protein 2	0	0	0	0.987015	1.03561	0.794111	0.832195	-0.0188567	0.0504867	-0.332587	-0.265007	0.820098	0.566997	0.0158371	0.00266706	3	3	3	3	3	3	3	3	18.6811	18.6649	18.7631	18.827	18.6082	18.6173	19.2839	19.397	19.3314	19.2401	19.4713	19.4523	19.6015	19.7662	19.7793	19.3254	19.3214	19.5025	19.0776	19.03	19.0403	18.7555	18.7393
Commd3	Q63829	Q63829	COMM domain-containing protein 3	0	0	0	0.938117	1.12956	0.772441	0.732334	-0.09216	0.17576	-0.372503	-0.449427	0.33194	0.178027	0.143742	0.0423525	3	3	3	3	3	3	3	3	18.5672	18.4549	18.6185	18.5909	18.392	18.3811	18.563	18.8008	18.4519	18.7278	18.8376	18.7777	19.2472	19.3241	18.7109	18.7693	18.812	18.5833	18.8491	18.7988	18.503	18.4694	18.234
Commd4	Q9CQ02	Q9CQ02	COMM domain-containing protein 4	0	0	0	0.989586	0.920813	0.742857	0.767098	-0.0151033	-0.11902	-0.428843	-0.382517	0.86678	0.0998627	0.0898573	0.04544	3	3	3	3	3	3	3	3	18.3448	18.2642	18.3264	18.4577	18.2032	18.2291	18.9209	18.7793	18.8117	18.7823	18.6586	18.7139	18.9692	19.1952	19.2236	18.5128	18.5388	19.05	18.4669	18.4663	18.2231	17.815	18.1807
Commd5	Q8R395	Q8R395	COMM domain-containing protein 5	0	0	-1	0.982081	1.0765	0.758766	0.522548	-0.0260867	0.106353	-0.398273	-0.936363	0.778465	0.258636	0.0234701	0.000200075	3	3	3	3	3	3	3	3	17.8092	17.8644	17.8019	17.9631	17.6824	17.7518	17.7146	17.9502	17.718	17.9401	17.8668	17.8949	18.3919	18.5162	18.295	17.9275	17.8959	18.1849	17.8721	17.9737	17.7852	17.0314	16.8749
Commd6	Q3V4B5	Q3V4B5	COMM domain-containing protein 6	0	0	0	0.888722	1.15989	0.945498	0.697187	-0.170197	0.213983	-0.0808533	-0.520383	0.288388	0.052146	0.746119	0.132359	3	3	3	3	3	3	3	3	17.8247	17.4688	17.8415	17.677	17.475	17.4724	18.3787	18.3452	18.2698	18.4093	18.6504	18.5759	18.8207	18.6001	18.0402	18.3694	18.4295	18.4195	18.1642	17.836	18.0598	17.6286	17.8684
Commd7	Q8BG94	Q8BG94	COMM domain-containing protein 7	0	0	0	1.02075	0.932169	0.798107	0.79835	0.0296233	-0.101337	-0.325347	-0.324907	0.783822	0.154831	0.00153453	0.00145156	3	3	3	3	3	3	3	3	17.3079	17.2362	17.2741	17.4892	17.2648	17.1531	18.2877	18.3083	18.23	18.2463	18.0709	18.2047	18.6127	18.6676	18.6704	18.2771	18.2979	18.3997	18.1703	18.119	18.0789	17.7336	17.8309
Commd8	Q9CZG3	Q9CZG3	COMM domain-containing protein 8	0	0	-1	0.99349	1.11988	1.04704	0.614397	-0.00942333	0.163347	0.0663167	-0.702757	0.898139	0.284615	0.813726	0.00499745	3	3	3	3	3	3	3	3	17.808	17.6535	17.8523	17.8227	17.7572	17.7057	18.0102	18.1589	17.71	18.11	18.1408	18.1183	18.5067	18.3127	17.665	18.1789	18.363	18.1413	17.8309	17.9127	17.5832	17.1641	17.1348
Commd9	Q8K2Q0	Q8K2Q0	COMM domain-containing protein 9	0	0	0	1.02376	1.01535	0.82609	0.77561	0.0338833	0.0219733	-0.27563	-0.366597	0.475718	0.736364	0.0131075	0.000919965	3	3	3	3	3	3	3	3	18.4233	18.3012	18.3899	18.4395	18.415	18.3616	18.9525	18.9287	18.8799	19.0551	18.9003	18.8716	19.3467	19.3583	19.2314	19.0108	18.9647	19.1341	18.4532	18.4408	18.4227	18.0337	18.0295
Comt	O88587	O88587	Catechol O-methyltransferase	0	0	0	0.986584	1.17864	1.21692	1.41872	-0.0194867	0.237127	0.283233	0.50459	0.808826	0.00150021	0.0306859	0.00355789	3	3	3	3	3	3	3	3	19.6803	19.7126	19.7565	19.8408	19.6157	19.6345	20.4179	20.3937	20.3223	20.5956	20.6172	20.6325	20.698	20.6978	20.5397	21.0117	20.9811	20.7924	20.5329	20.5317	20.5443	21.1972	20.9196
Comtd1	Q8BIG7	Q8BIG7	Catechol O-methyltransferase domain-containing protein 1	0	0	0	0.915693	1.08752	0.91172	1.01945	-0.127063	0.121037	-0.133337	0.0277933	0.189379	0.328469	0.0344281	0.884243	3	3	3	3	3	3	3	3	18.6228	18.3956	18.4243	18.4252	18.3354	18.3009	19.5559	19.9224	19.8116	19.8934	19.8669	19.8926	19.8048	19.9017	19.881	19.7634	19.7554	19.6687	19.1242	18.9204	19.0751	19.4036	18.8806
Copa	Q8CIE6	Q8CIE6	Coatomer subunit alpha	0	0	0	1.04679	1.08619	1.38749	1.61319	0.0659733	0.11927	0.472473	0.689917	0.217354	0.140632	0.000297712	0.000723755	3	3	3	3	3	3	3	3	19.3591	19.3311	19.2993	19.4547	19.4174	19.3153	20.1856	20.1659	20.1804	20.4009	20.3109	20.1779	20.3931	20.496	20.5247	20.9456	20.9494	20.9362	20.1625	20.2333	20.1461	20.7671	21.0004
Copb1	Q9JIF7	Q9JIF7	Coatomer subunit beta	0	0	0	1.01143	1.21829	1.4036	1.59328	0.0164	0.284857	0.489133	0.672	0.725193	0.0113343	0.00397932	1.5288e-06	3	3	3	3	3	3	3	3	18.784	18.9226	18.8335	18.8326	18.8718	18.8849	19.6724	19.7057	19.536	19.9819	19.8527	19.9342	20.025	20.0535	19.9425	20.5994	20.5388	20.3502	19.7492	19.7127	19.7153	20.3996	20.3805
Copb2	O55029	O55029	Coatomer subunit beta'	0	0	0	0.983659	1.26817	1.41162	1.42583	-0.02377	0.342753	0.49735	0.511803	0.466296	0.0117317	0.00636604	0.00655529	3	3	3	3	3	3	3	3	19.1421	19.0701	19.0982	19.1201	19.0681	19.0508	19.5415	19.6853	19.4861	20.0137	19.8501	19.8774	20.0148	20.1381	19.8646	20.5601	20.5515	20.398	19.7608	19.8019	19.5536	20.1452	20.3401
Cope	O89079	O89079	Coatomer subunit epsilon	0	0	0	0.966778	1.32042	1.43406	1.01772	-0.0487433	0.401	0.520107	0.0253467	0.0834104	0.00236556	0.00798911	0.802181	3	3	3	3	3	3	3	3	17.8518	17.8615	17.8133	17.7846	17.8232	17.7725	17.9104	18.0033	17.8344	18.381	18.2903	18.2799	18.375	18.5734	18.2091	18.8987	18.8906	18.9285	17.8752	17.9739	17.8564	17.9006	18.0901
Copg1	Q9QZE5	Q9QZE5	Coatomer subunit gamma-1	0	0	0	1.00457	1.25538	1.35076	1.52654	0.00657333	0.32812	0.43377	0.610267	0.896428	0.00502915	0.00162859	0.000287331	3	3	3	3	3	3	3	3	17.7878	17.6276	17.6856	17.7184	17.7096	17.6927	18.4007	18.5542	18.3837	18.8184	18.7602	18.7444	18.7684	18.859	18.6819	19.2547	19.1719	19.1841	18.5386	18.4389	18.5612	19.1919	19.1008
Copg2	Q9QXK3	Q9QXK3	Coatomer subunit gamma-2	0	0	0	1.01691	1.26163	1.30096	1.59638	0.0241867	0.335283	0.379577	0.674803	0.29219	0.0142213	0.0073489	0.00275858	3	3	3	3	3	3	3	3	17.3966	17.3597	17.4048	17.406	17.4382	17.3893	18.2928	18.4252	18.1847	18.6662	18.5551	18.6872	18.5383	18.555	18.4386	18.9449	18.9673	18.7585	18.3996	18.3112	18.1684	18.8741	18.9083
Cops2	P61202	P61202	COP9 signalosome complex subunit 2	0	0	0	1.00625	0.937058	0.991249	0.945835	0.00898333	-0.09379	-0.01268	-0.08034	0.8888	0.290447	0.826127	0.223071	3	3	3	3	3	3	3	3	18.454	18.2674	18.3559	18.4221	18.3448	18.3374	18.8169	18.5867	18.8186	18.6438	18.6462	18.6508	18.9677	18.9268	18.9757	18.914	18.873	19.0451	18.2587	18.3732	18.2945	18.226	18.153
Cops3	O88543	O88543	COP9 signalosome complex subunit 3	0	0	0	0.991751	0.970744	0.963585	1.04131	-0.01195	-0.0428367	-0.0535167	0.0584033	0.818467	0.230855	0.301981	0.127766	3	3	3	3	3	3	3	3	19.3046	19.3815	19.4525	19.4129	19.3341	19.3557	20.4699	20.416	20.5179	20.4337	20.4312	20.4104	20.4755	20.3766	20.4621	20.4351	20.3959	20.3227	19.7734	19.7997	19.7284	19.8366	19.8574
Cops4	O88544	O88544	COP9 signalosome complex subunit 4	0	0	0	0.972329	1.03761	0.989133	1.03144	-0.0404833	0.05326	-0.0157633	0.0446633	0.311375	0.226896	0.794791	0.309746	3	3	3	3	3	3	3	3	18.4804	18.4572	18.3908	18.4409	18.4026	18.3634	19.3921	19.4606	19.4922	19.5391	19.5052	19.4603	19.6036	19.7057	19.5471	19.6048	19.6586	19.5457	19.1618	19.1599	19.0735	19.16	19.1436
Cops5	O35864	O35864	COP9 signalosome complex subunit 5	0	0	0	1.02558	0.985665	0.981863	1.10904	0.0364333	-0.02083	-0.0264067	0.149307	0.743964	0.753216	0.41007	0.38442	3	3	3	3	3	3	3	3	18.218	18.2837	18.4662	18.505	18.2839	18.2884	19.7323	19.6523	19.8494	19.725	19.7638	19.6827	19.472	19.4426	19.4809	19.4841	19.4392	19.393	18.5743	18.5761	18.3389	18.4434	18.8915
Cops6	O88545	O88545	COP9 signalosome complex subunit 6	0	0	0	0.991336	1.01166	0.982948	1.05062	-0.0125533	0.0167233	-0.0248133	0.0712367	0.80282	0.7908	0.571427	0.317454	3	3	3	3	3	3	3	3	18.3016	18.2195	18.2614	18.2865	18.167	18.2913	18.9604	18.8119	19.0065	18.9532	18.942	18.9338	18.9921	19.0005	19.0653	18.9505	18.9738	19.0591	18.5968	18.7423	18.6131	18.7079	18.801
Cops7a	Q9CZ04	Q9CZ04	COP9 signalosome complex subunit 7a	0	0	0	0.924283	1.1174	0.914241	1.1377	-0.113593	0.16015	-0.129353	0.18612	0.0672797	0.34736	0.295329	0.00830988	3	3	3	3	3	3	3	3	16.8425	16.8635	16.9592	16.7955	16.8097	16.7192	17.7073	17.4232	17.8643	17.8943	17.9106	17.6704	17.6142	17.6187	17.8871	17.694	17.5263	17.5116	17.2695	17.2075	17.2876	17.474	17.3817
Cops7b	Q8BV13	Q8BV13	COP9 signalosome complex subunit 7b	0	0	0	0.983179	1.02228	1.19011	0.963671	-0.0244733	0.0317967	0.2511	-0.0533867	0.723966	0.745585	0.0204938	0.234715	3	3	3	3	3	3	3	3	17.4039	17.3563	17.4795	17.4962	17.3365	17.3337	17.7537	17.6504	17.7236	17.8799	17.7599	17.5833	17.7595	17.867	17.9277	18.1846	18.0245	18.0984	17.4313	17.4557	17.4555	17.379	17.3383
Cops8	Q8VBV7	Q8VBV7	COP9 signalosome complex subunit 8	0	0	0	0.925349	1.06349	0.999769	1.02468	-0.11193	0.08881	-0.000333333	0.03517	0.275489	0.414612	0.997199	0.718078	3	3	3	3	3	3	3	3	18.0176	17.8513	17.9173	17.9655	17.7406	17.7444	18.6836	18.4825	18.4505	18.6069	18.527	18.7491	18.8575	18.6958	18.6089	18.6178	18.7623	18.7811	18.4556	18.5559	18.3181	18.5962	18.4123
Cops9	Q3U898	Q3U898	COP9 signalosome complex subunit 9	0	0	0	NaN	NaN	0.843672	NaN	NaN	NaN	-0.245247	NaN	NaN	NaN	0.557173	NaN	2	0	0	2	3	3	3	0	13.5272	NaN	13.5314	NaN	NaN	NaN	NaN	NaN	NaN	13.7694	NaN	12.4238	15.3579	14.7255	14.2841	14.1606	14.9342	14.5371	13.6854	14.4208	14.2281	NaN	NaN
Copz1	P61924	P61924	Coatomer subunit zeta-1	0	0	0	0.905789	1.25691	1.33164	1.32921	-0.142753	0.32988	0.413203	0.410567	0.0843256	0.0310504	0.0235108	0.0304052	3	3	3	3	3	3	3	3	19.5425	19.6714	19.6901	19.4086	19.5403	19.5268	19.8115	19.5532	19.6963	20.0908	20.0792	19.8806	20.0639	20.1274	19.8604	20.5781	20.424	20.2893	19.4477	19.4394	19.2628	20.0095	19.7193
Copz2	Q9JHH9	Q9JHH9	Coatomer subunit zeta-2	0	0	0	1.09359	1.31122	1.12629	2.06032	0.129075	0.390908	0.171583	1.04287	NaN	NaN	0.582841	0.00112998	3	2	2	3	3	3	3	3	15.9648	15.8924	15.9558	NaN	16.0008	16.1327	16.559	16.6168	NaN	16.9677	17.0554	16.9134	17.0778	17.1884	16.8444	17.6746	16.7425	17.2082	16.1549	16.148	16.3947	17.4657	17.181
Coq10b	Q3THF9	Q3THF9	Coenzyme Q-binding protein COQ10 homolog B, mitochondrial	0	0	0	1.08297	0.777352	0.863262	1.38218	0.114997	-0.36336	-0.21213	0.46695	0.349649	0.134572	0.369157	0.112322	3	3	3	3	3	3	3	3	14.1294	14.1324	14.1246	14.4554	14.0952	14.1806	14.1626	14.5629	14.6932	13.9122	14.1223	14.2942	14.1071	14.4274	14.7433	14.0475	14.3976	14.1963	13.8805	13.6503	13.884	13.8418	14.4398
Coq3	Q8BMS4	Q8BMS4	Ubiquinone biosynthesis O-methyltransferase, mitochondrial	0	0	0	1.17572	0.698785	0.663035	0.800278	0.23355	-0.51708	-0.592843	-0.321427	0.448256	0.327522	0.104106	NaN	3	3	3	3	3	3	3	1	13.6869	13.6789	12.9634	13.9575	13.5207	13.5516	15.5225	14.5107	15.6087	15.0361	14.0952	14.9594	15.2049	14.7817	15.6478	14.5325	14.8781	14.4452	14.729	15.4898	13.8376	14.364	NaN
Coq5	Q9CXI0	Q9CXI0	2-methoxy-6-polyprenyl-1,4-benzoquinol methylase, mitochondrial	0	0	0	1.1454	0.386046	0.813404	0.974439	0.19585	-1.37316	-0.297957	-0.0373567	0.549518	0.0365371	0.233915	0.854541	3	3	3	3	3	3	3	3	13.5267	13.8714	14.393	14.2598	14.3172	13.8016	16.0885	15.7951	16.0886	15.477	14.0912	14.2845	16.1132	15.7426	16.449	15.7281	15.9227	15.7601	15.3023	15.3772	15.6028	15.7034	15.3404
Coq6	Q8R1S0	Q8R1S0	Ubiquinone biosynthesis monooxygenase COQ6, mitochondrial	0	0	0	0.393331	1.10099	1.0843	2.53645	-1.34618	0.138797	0.116767	1.34281	0.391514	0.479773	0.223855	0.318632	3	3	3	3	3	3	3	3	18.6009	18.3987	18.5201	18.6143	14.3583	18.5085	17.7132	17.6036	17.9605	18.1149	17.9526	17.6263	18.7765	18.7752	18.5833	18.9104	18.8364	18.7386	18.6816	14.8909	18.0231	18.3763	18.8558
Coq7	P97478	P97478	5-demethoxyubiquinone hydroxylase, mitochondrial	0	0	0	0.833607	0.514946	1.03321	1.36228	-0.26256	-0.957507	0.0471267	0.446027	0.47591	0.00907064	0.828609	0.0176831	3	3	3	3	3	3	3	3	13.7221	13.2533	13.7341	13.8763	13.1529	12.8927	15.6971	15.4325	15.8849	14.6662	14.4747	15.0011	15.3195	14.77	15.3998	15.2973	15.2069	15.1264	14.422	14.68	14.6724	14.9357	14.9878
Coq8a	Q60936	Q60936	Atypical kinase COQ8A, mitochondrial	0	0	0	1.0597	0.095258	0.476584	5.63982	0.083655	-3.39202	-1.0692	2.49565	NaN	NaN	0.0633178	0.31693	2	2	3	1	3	3	3	3	NaN	12.3315	11.8157	NaN	12.4842	11.8303	14.3168	15.7798	14.2537	11.3914	NaN	NaN	14.1202	14.0745	14.2315	12.9441	13.8504	12.4241	11.966	10.6774	17.6159	14.9567	16.4188
Coq8b	Q566J8	Q566J8	Atypical kinase COQ8B, mitochondrial	0	0	0	0.972859	0.864378	0.937216	0.96522	-0.0396967	-0.210265	-0.0935467	-0.05107	0.712177	NaN	0.745663	NaN	3	3	2	1	3	3	2	1	14.0392	13.9722	13.8687	13.8925	13.7854	14.0831	13.9575	14.6831	NaN	14.11	NaN	NaN	14.5747	15.1904	14.8792	14.9384	15.0374	14.3878	14.2249	14.3666	NaN	NaN	NaN
Coq9	Q8K1Z0	Q8K1Z0	Ubiquinone biosynthesis protein COQ9, mitochondrial	0	0	0	0.933717	0.516585	0.70722	0.821649	-0.0989433	-0.952923	-0.49977	-0.283407	0.245714	0.00504565	0.0939158	0.0691917	3	3	3	3	3	3	3	3	15.633	15.8049	15.8277	15.6052	15.6306	15.7329	18.2946	18.0058	18.5384	17.473	17.2382	17.2688	17.731	17.2989	18.0107	17.3204	17.2256	16.9953	16.5412	16.6942	16.4775	16.1485	16.4698
Coro1a	O89053	O89053	Coronin-1A	0	0	0	0.966423	1.19141	0.956257	0.703393	-0.0492733	0.25267	-0.06453	-0.507597	0.561575	0.0466786	0.789946	0.102633	3	3	3	3	3	3	3	3	23.9368	23.9566	24.0797	24.0673	23.859	23.8989	23.4688	23.7026	23.4378	23.7302	23.8071	23.83	23.6644	23.8519	23.106	23.4505	23.4345	23.5437	23.539	23.252	22.8086	22.4876	22.8783
Coro1b	Q9WUM3	Q9WUM3	Coronin-1B	0	0	-1	0.931551	1.02734	0.853867	0.548946	-0.102293	0.0389133	-0.227917	-0.865263	0.271575	0.598389	0.21085	3.99853e-06	3	3	3	3	3	3	3	3	21.6852	21.7063	21.8856	21.7541	21.598	21.6181	22.5243	22.5715	22.4537	22.4461	22.6481	22.5719	22.4356	22.5114	22.0682	22.0578	22.027	22.2467	22.0477	22.1317	22.0911	21.2155	21.2321
Coro1c	Q9WUM4	Q9WUM4	Coronin-1C	0	0	0	0.945562	1.26851	1.4708	1.72394	-0.0807567	0.343133	0.5566	0.78571	0.3911	0.000421782	0.00227444	0.00127362	3	3	3	3	3	3	3	3	19.7547	19.6576	19.882	19.7824	19.6704	19.5992	20.0611	20.0829	20.144	20.414	20.4786	20.4248	19.2646	19.401	19.1251	19.8156	19.8397	19.8052	19.4039	19.5443	19.3026	20.1351	20.3374
Coro2a	Q8C0P5	Q8C0P5	Coronin-2A	0	0	0	1.0817	0.869955	1.67936	0.979282	0.113307	-0.200987	0.747913	-0.0302033	0.711445	0.584341	0.0766797	0.907409	3	3	3	3	3	3	3	3	15.9822	15.5453	15.7767	16.3384	15.8518	15.4539	16.212	16.5247	16.5174	15.574	16.5731	16.5041	15.4721	15.4842	16.3726	16.3273	16.6731	16.5724	16.7081	16.4084	16.6347	16.3637	16.2921
[truncated: 5,081 more rows]
[truncated: 108 more columns]

## Sheet: APP-KI
				MARPs (upregulated: +1; downregulated: -1)			Protein LFQ ratios of APP-KI vs WT microglia				log2 transformed protein LFQ ratios of APP-KI vs WT microglia				Student's Ttest p-values of protein changes APP-KI vs WT microglia (p < 0.05: red)				Number of quantifications in different experimental groups								log2 transformed LFQ intensities WT 1 month			log2 transformed LFQ intensities APP-KI 1 month			log2 transformed LFQ intensities WT 3 months			log2 transformed LFQ intensities APP-KI 3 months			log2 transformed LFQ intensities WT 6 months			log2 transformed LFQ intensities APP-KI 6 months			log2 transformed LFQ intensities WT 12 months			log2 transformed LFQ intensities APP-KI 12 months
[truncated: 6,113 more rows]
[truncated: 108 more columns]

[truncated: 1 more sheets: MARPs]
